# Supplementary material for: Integrative Cancer Pharmacogenomics to Infer Large-Scale Drug Taxonomy
Source: Oxford University Press journal article supplement (doi:10.1158/0008-5472.can-17-0096), 2017-03-17
Supplement: 00085472can170096-sup-177323_1_supp_3899876_bmkvbb.xlsx [file 00085472can170096-sup-177323_1_supp_3899876_bmkvbb.xlsx]

## Sheet: A) DNF(CTRPv2)
	ABIRATERONE	ABT737	AC55649	AFATINIB	AGK2	ALISERTIB	ALVOCIDIB	AM580	APICIDIN	AT7867	AVICIND	AXITINIB	AZACITIDINE	AZD1480	AZD6482	AZD7545	AZD7762	AZD8055	BARASERTIB	BAXCHANNELBLOCKER	BELINOSTAT	BETULINICACID	BI2536	BIBR1532	BIX01294	BLEBBISTATIN	BMS345541	BMS536924	BMS754807	BORTEZOMIB	BOSUTINIB	BRDK01737880	BRDK02492147	BRDK13999467	BRDK14844214	BRDK27224038	BRDK27986637	BRDK33514849	BRDK49290616	BRDK50799972	BRDK55116708	BRDK63431240	BRDK71935468	BRDK86535717	BRDK88742110	BRDK94991378	BRDK96431673	BREFELDINA	BRIVANIB
ABIRATERONE	0.559046	0.00376615	0.00439967	0.00363016	0.00377332	0.00379009	0.00380156	0.00457158	0.00410417	0.00386931	0.00379147	0.00417181	0.00466555	0.00378541	0.00362068	0.00386065	0.00362756	0.00362677	0.00367383	0.00400738	0.00421174	0.00508569	0.00370776	0.00389494	0.00362344	0.00374025	0.003723	0.00360649	0.00363311	0.00372866	0.00364296	0.00372492	0.00401486	0.00429358	0.00389262	0.00372123	0.00379887	0.00411954	0.00382645	0.00373547	0.00371165	0.00377452	0.00369056	0.0038912	0.00452552	0.00371483	0.0038622	0.00381967	0.00522927
ABT737	0.00376615	0.558719	0.00388166	0.00363786	0.00380951	0.00410331	0.0036233	0.00398921	0.0038556	0.00367932	0.00371119	0.00376034	0.00414616	0.00363751	0.00369623	0.0045381	0.0039366	0.0036028	0.00383164	0.00424987	0.00444426	0.00389222	0.00412925	0.00400911	0.00369974	0.00390629	0.00362948	0.00380349	0.00381649	0.0039072	0.00359152	0.00458202	0.00438137	0.00410321	0.00396074	0.00396896	0.00385044	0.00388624	0.00378487	0.00430654	0.00400368	0.00393153	0.00393089	0.00383518	0.00372208	0.00381972	0.00385023	0.00529664	0.00367126
AC55649	0.00439967	0.00388166	0.559068	0.0036315	0.00382986	0.00366184	0.00376387	0.0047295	0.00381124	0.00439028	0.00413546	0.00367011	0.00390826	0.00385147	0.0035618	0.0037856	0.00362281	0.00362166	0.00369599	0.00373443	0.00377226	0.00412442	0.00364948	0.00417885	0.00372049	0.00552407	0.0036914	0.00359607	0.00360892	0.00384299	0.00361689	0.00371908	0.0044655	0.0040204	0.00389887	0.00417523	0.00422338	0.00365195	0.00455215	0.00396074	0.00373666	0.00362408	0.00394953	0.00430949	0.0039014	0.0039882	0.00430704	0.00377449	0.00368162
AFATINIB	0.00363016	0.00363786	0.0036315	0.558099	0.00403419	0.00399466	0.00359406	0.00355859	0.00356895	0.00380471	0.00368344	0.0039311	0.00351643	0.00408057	0.00385804	0.00368997	0.00407477	0.00386353	0.00510596	0.00376013	0.00353662	0.00354727	0.00400273	0.00357821	0.00432769	0.00411376	0.00356909	0.004145	0.00411988	0.00357332	0.00644464	0.00378353	0.0036189	0.00373086	0.00361706	0.0036186	0.00359258	0.00383146	0.00360972	0.00367936	0.00367377	0.00391616	0.00354645	0.00357878	0.00425327	0.00353326	0.0035838	0.00356566	0.00402816
AGK2	0.00377332	0.00380951	0.00382986	0.00403419	0.559514	0.00376104	0.00375229	0.00388988	0.00494267	0.00374121	0.00381839	0.00407406	0.00380379	0.00373262	0.00376998	0.0039259	0.00377145	0.00373891	0.00380835	0.00379046	0.00388395	0.00412158	0.00372375	0.00453335	0.00459585	0.00379958	0.00377157	0.00431977	0.00373825	0.00382398	0.00491696	0.00377241	0.00403422	0.00388664	0.00462016	0.00384092	0.00440837	0.0038354	0.00382682	0.00437856	0.00377046	0.00382603	0.00377709	0.0039481	0.00387243	0.00378408	0.00436718	0.00370837	0.00378771
ALISERTIB	0.00379009	0.00410331	0.00366184	0.00399466	0.00376104	0.558085	0.0037468	0.00419955	0.00367569	0.00388216	0.00373434	0.00447167	0.00371901	0.00394246	0.00374878	0.00368973	0.00387779	0.00438337	0.0053935	0.0037101	0.00396573	0.00427927	0.00417993	0.00401166	0.00379538	0.00372201	0.0038371	0.00413477	0.00471269	0.00364046	0.0038326	0.00526271	0.00379865	0.00384833	0.00380737	0.00371259	0.00372083	0.00385269	0.00375629	0.00380136	0.00391079	0.00387233	0.00365639	0.00375947	0.00376952	0.00365533	0.00378349	0.00368012	0.00392659
ALVOCIDIB	0.00380156	0.0036233	0.00376387	0.00359406	0.00375229	0.0037468	0.55764	0.00368222	0.00392258	0.00387011	0.00409216	0.00367554	0.00372375	0.00371454	0.00376458	0.00368946	0.00421191	0.00395477	0.00384195	0.0037299	0.0040804	0.00370295	0.00428056	0.00377657	0.00432204	0.00401327	0.00688535	0.00372843	0.0037361	0.00405071	0.00413279	0.00375488	0.00371254	0.00363861	0.00367985	0.00374416	0.00382632	0.00362529	0.00378215	0.00371748	0.00369792	0.0037195	0.00408014	0.00394308	0.00378659	0.00408781	0.00387915	0.00432439	0.0037153
AM580	0.00457158	0.00398921	0.0047295	0.00355859	0.00388988	0.00419955	0.00368222	0.558118	0.00384623	0.00382344	0.00372526	0.00382603	0.00386971	0.00368886	0.00363002	0.00411617	0.00369687	0.00356812	0.00369411	0.00386382	0.00443905	0.00468479	0.00369766	0.00568326	0.0036247	0.00405797	0.00365279	0.00394124	0.00370278	0.00378887	0.00354243	0.00384324	0.00368462	0.00364479	0.0037118	0.00357956	0.0036874	0.00387128	0.00368853	0.00368143	0.00378679	0.00362226	0.00381367	0.00361162	0.00370603	0.00380448	0.00362038	0.00379702	0.00490262
APICIDIN	0.00410417	0.0038556	0.00381124	0.00356895	0.00494267	0.00367569	0.00392258	0.00384623	0.557853	0.00376639	0.00383527	0.00366702	0.00388257	0.00374321	0.00362582	0.00375472	0.00378243	0.00370421	0.00362775	0.00436297	0.00596286	0.0040738	0.00387414	0.00378006	0.00480283	0.00372148	0.00380891	0.00366332	0.00360722	0.00514312	0.00478148	0.00372321	0.0037397	0.00372403	0.00385084	0.00374082	0.00392846	0.0037918	0.00392571	0.00394259	0.00391693	0.00369032	0.00384032	0.00376792	0.00395705	0.00385455	0.00382416	0.00381886	0.00371543
AT7867	0.00386931	0.00367932	0.00439028	0.00380471	0.00374121	0.00388216	0.00387011	0.00382344	0.00376639	0.559575	0.00413573	0.0045728	0.00365658	0.00439754	0.00474981	0.0039321	0.00476259	0.00468798	0.00382495	0.00384311	0.00367986	0.00365954	0.00384439	0.00379251	0.00392012	0.00395713	0.00429684	0.00407068	0.00414508	0.00395745	0.00381443	0.00373087	0.00369688	0.00360497	0.00358532	0.0036348	0.00365521	0.00368836	0.0036664	0.0036215	0.00369525	0.00367964	0.00363257	0.00363136	0.00404968	0.00364335	0.00365655	0.00378665	0.00379659
AVICIND	0.00379147	0.00371119	0.00413546	0.00368344	0.00381839	0.00373434	0.00409216	0.00372526	0.00383527	0.00413573	0.556842	0.00374279	0.00390143	0.00372725	0.00416133	0.00461204	0.00403703	0.00391211	0.0037465	0.00369876	0.00366566	0.00393418	0.00372724	0.00376878	0.00461819	0.00379845	0.00439107	0.00372384	0.00386432	0.0038268	0.00440884	0.00374732	0.00417334	0.00371724	0.00373628	0.00409625	0.00403585	0.00375266	0.00387396	0.00377549	0.00370651	0.00369464	0.00374717	0.00407069	0.00378263	0.00378032	0.00420491	0.0045447	0.00376718
AXITINIB	0.00417181	0.00376034	0.00367011	0.0039311	0.00407406	0.00447167	0.00367554	0.00382603	0.00366702	0.0045728	0.00374279	0.557836	0.00366628	0.00471979	0.00381058	0.00398697	0.0038474	0.00378025	0.0048678	0.00376206	0.00392909	0.00372085	0.00380074	0.00379678	0.00375108	0.00371809	0.00379647	0.00395688	0.00395532	0.00358321	0.0038724	0.00402903	0.00450956	0.00433788	0.00382483	0.00373113	0.00369971	0.00398858	0.00413543	0.0038296	0.0037234	0.00411038	0.00359219	0.00387618	0.00429628	0.00360585	0.00388234	0.00361029	0.0042679
AZACITIDINE	0.00466555	0.00414616	0.00390826	0.00351643	0.00380379	0.00371901	0.00372375	0.00386971	0.00388257	0.00365658	0.00390143	0.00366628	0.560748	0.0036671	0.00372673	0.00378364	0.00360006	0.00356809	0.00363454	0.00389037	0.00376758	0.00395183	0.00361869	0.00391168	0.00359429	0.00378337	0.00366376	0.00360412	0.00365551	0.00390799	0.00353906	0.00387387	0.00378492	0.00372809	0.0039035	0.00378032	0.00394709	0.00383462	0.00395028	0.00374668	0.00374385	0.00371992	0.00409505	0.00397467	0.00396364	0.0039882	0.00398003	0.00446524	0.0041784
AZD1480	0.00378541	0.00363751	0.00385147	0.00408057	0.00373262	0.00394246	0.00371454	0.00368886	0.00374321	0.00439754	0.00372725	0.00471979	0.0036671	0.558422	0.00394144	0.00368456	0.00386933	0.00428469	0.00481574	0.00379016	0.00445335	0.00371539	0.00402303	0.00364078	0.0041281	0.00373591	0.00391739	0.00402938	0.0052801	0.0036026	0.00398306	0.00377452	0.00412794	0.00370791	0.00365312	0.00363635	0.00362197	0.00420433	0.00444289	0.00368457	0.00367378	0.00375867	0.00367245	0.0037928	0.00377395	0.00366034	0.00372507	0.00361832	0.0040094
AZD6482	0.00362068	0.00369623	0.0035618	0.00385804	0.00376998	0.00374878	0.00376458	0.00363002	0.00362582	0.00474981	0.00416133	0.00381058	0.00372673	0.00394144	0.557677	0.00402946	0.00499179	0.0055059	0.00372598	0.00377075	0.003683	0.00350831	0.0038931	0.00387545	0.00386292	0.00404264	0.0037913	0.00544951	0.00437644	0.00358912	0.00384835	0.00365326	0.00368657	0.00359896	0.00357311	0.00371438	0.00356299	0.003701	0.00363688	0.00364796	0.00412236	0.00369043	0.00352024	0.00359852	0.0038518	0.0035436	0.00361588	0.00363659	0.0037658
AZD7545	0.00386065	0.0045381	0.0037856	0.00368997	0.0039259	0.00368973	0.00368946	0.00411617	0.00375472	0.0039321	0.00461204	0.00398697	0.00378364	0.00368456	0.00402946	0.556742	0.00391569	0.00382297	0.00368264	0.00387797	0.00401007	0.0038312	0.00372137	0.00425929	0.00374694	0.00387388	0.00371903	0.00373859	0.00392722	0.00382954	0.00371111	0.00383155	0.003742	0.00372979	0.00374394	0.00412973	0.00380841	0.00373067	0.00367855	0.00375662	0.00396269	0.00369376	0.003692	0.00370484	0.00384329	0.00367734	0.00372797	0.00382838	0.00438394
AZD7762	0.00362756	0.0039366	0.00362281	0.00407477	0.00377145	0.00387779	0.00421191	0.00369687	0.00378243	0.00476259	0.00403703	0.0038474	0.00360006	0.00386933	0.00499179	0.00391569	0.557731	0.00419108	0.00397162	0.00379506	0.00377145	0.00355237	0.00463765	0.00367968	0.00394084	0.00368982	0.0039627	0.00511988	0.00465534	0.00374722	0.00443212	0.00418594	0.00366495	0.00366519	0.00365481	0.00370699	0.00369581	0.00373629	0.0037149	0.00369682	0.0044154	0.00383549	0.00358155	0.00367188	0.00416203	0.00359559	0.00372493	0.00373795	0.0037657
AZD8055	0.00362677	0.0036028	0.00362166	0.00386353	0.00373891	0.00438337	0.00395477	0.00356812	0.00370421	0.00468798	0.00391211	0.00378025	0.00356809	0.00428469	0.0055059	0.00382297	0.00419108	0.55896	0.00381655	0.00377949	0.0038031	0.00355244	0.00387927	0.0036718	0.00466876	0.00410985	0.00400697	0.00419603	0.00420951	0.00355798	0.00391447	0.00370247	0.00365941	0.00359103	0.00356554	0.00364624	0.00354562	0.00373134	0.00361571	0.00363883	0.00384178	0.00365814	0.00347168	0.00359243	0.00371704	0.00348439	0.00360989	0.00396958	0.00384301
BARASERTIB	0.00367383	0.00383164	0.00369599	0.00510596	0.00380835	0.0053935	0.00384195	0.00369411	0.00362775	0.00382495	0.0037465	0.0048678	0.00363454	0.00481574	0.00372598	0.00368264	0.00397162	0.00381655	0.557281	0.00373305	0.00363764	0.00366861	0.00413814	0.00363625	0.00429405	0.00383946	0.00387913	0.0042668	0.00528626	0.00354722	0.0043687	0.00576178	0.00413652	0.00402679	0.00374746	0.00374678	0.00370282	0.00393468	0.00385221	0.00442048	0.00398551	0.00400429	0.00359941	0.00382582	0.00380139	0.00357343	0.00422904	0.00363481	0.00478363
BAXCHANNELBLOCKER	0.00400738	0.00424987	0.00373443	0.00376013	0.00379046	0.0037101	0.0037299	0.00386382	0.00436297	0.00384311	0.00369876	0.00376206	0.00389037	0.00379016	0.00377075	0.00387797	0.00379506	0.00377949	0.00373305	0.558065	0.00381231	0.00374893	0.00394688	0.00383591	0.00470397	0.00363627	0.0037783	0.00433317	0.00384246	0.00393165	0.00379484	0.00379842	0.00359607	0.00371479	0.003731	0.00369444	0.00372245	0.00381099	0.00366664	0.00425874	0.00392875	0.00409101	0.00379396	0.00364422	0.00462628	0.00376858	0.00367997	0.00393845	0.00378972
BELINOSTAT	0.00421174	0.00444426	0.00377226	0.00353662	0.00388395	0.00396573	0.0040804	0.00443905	0.00596286	0.00367986	0.00366566	0.00392909	0.00376758	0.00445335	0.003683	0.00401007	0.00377145	0.0038031	0.00363764	0.00381231	0.557608	0.00446665	0.00407593	0.00440459	0.00366304	0.00372184	0.00376081	0.00370713	0.0036435	0.00408822	0.00358011	0.0037803	0.00430155	0.00381149	0.00388662	0.00364705	0.00368145	0.00438905	0.0044475	0.0037395	0.00395146	0.0038168	0.00379359	0.00379393	0.00378464	0.00379726	0.00373191	0.00393899	0.00397499
BETULINICACID	0.00508569	0.00389222	0.00412442	0.00354727	0.00412158	0.00427927	0.00370295	0.00468479	0.0040738	0.00365954	0.00393418	0.00372085	0.00395183	0.00371539	0.00350831	0.0038312	0.00355237	0.00355244	0.00366861	0.00374893	0.00446665	0.559224	0.00363007	0.00401957	0.0036427	0.00392254	0.00366096	0.00356629	0.00360201	0.00378882	0.00354701	0.00388026	0.00395006	0.00391969	0.00452219	0.00384228	0.00495038	0.00385557	0.00390959	0.00382209	0.00372683	0.00378657	0.00391139	0.00393837	0.00375842	0.00389739	0.00396664	0.00465232	0.00383815
BI2536	0.00370776	0.00412925	0.00364948	0.00400273	0.00372375	0.00417993	0.00428056	0.00369766	0.00387414	0.00384439	0.00372724	0.00380074	0.00361869	0.00402303	0.0038931	0.00372137	0.00463765	0.00387927	0.00413814	0.00394688	0.00407593	0.00363007	0.556511	0.00364028	0.00483851	0.00373282	0.0041427	0.00419606	0.00455072	0.00367801	0.00399515	0.00380968	0.00366045	0.0037006	0.00369766	0.00370111	0.00368561	0.00377796	0.00371314	0.00375928	0.00389304	0.00388075	0.00411888	0.00367886	0.00420828	0.00387915	0.00366831	0.00370059	0.00380108
BIBR1532	0.00389494	0.00400911	0.00417885	0.00357821	0.00453335	0.00401166	0.00377657	0.00568326	0.00378006	0.00379251	0.00376878	0.00379678	0.00391168	0.00364078	0.00387545	0.00425929	0.00367968	0.0036718	0.00363625	0.00383591	0.00440459	0.00401957	0.00364028	0.557962	0.00361731	0.00384275	0.00364847	0.00397864	0.00425216	0.00391092	0.00356563	0.00380428	0.00367958	0.00362873	0.0036241	0.00363313	0.00368074	0.00364023	0.00364155	0.0036959	0.00425119	0.00361297	0.00388548	0.00362825	0.00369458	0.00382816	0.00367242	0.00391205	0.00380123
BIX01294	0.00362344	0.00369974	0.00372049	0.00432769	0.00459585	0.00379538	0.00432204	0.0036247	0.00480283	0.00392012	0.00461819	0.00375108	0.00359429	0.0041281	0.00386292	0.00374694	0.00394084	0.00466876	0.00429405	0.00470397	0.00366304	0.0036427	0.00483851	0.00361731	0.557339	0.00375772	0.00441114	0.00388219	0.00396069	0.00378406	0.0067099	0.00375168	0.00364399	0.00375511	0.00378593	0.0038414	0.00378748	0.00390828	0.0036577	0.00383378	0.00372674	0.00441385	0.00362769	0.00366511	0.00381725	0.00361376	0.00371448	0.00373483	0.00379594
BLEBBISTATIN	0.00374025	0.00390629	0.00552407	0.00411376	0.00379958	0.00372201	0.00401327	0.00405797	0.00372148	0.00395713	0.00379845	0.00371809	0.00378337	0.00373591	0.00404264	0.00387388	0.00368982	0.00410985	0.00383946	0.00363627	0.00372184	0.00392254	0.00373282	0.00384275	0.00375772	0.558076	0.00374139	0.00375676	0.00368906	0.00377373	0.00367649	0.00377756	0.00499917	0.00450808	0.0039919	0.00454213	0.00415207	0.003798	0.00463954	0.00442607	0.00383558	0.00376943	0.00461453	0.00495006	0.00391621	0.00485959	0.00477167	0.00371855	0.00368583
BMS345541	0.003723	0.00362948	0.0036914	0.00356909	0.00377157	0.0038371	0.00688535	0.00365279	0.00380891	0.00429684	0.00439107	0.00379647	0.00366376	0.00391739	0.0037913	0.00371903	0.0039627	0.00400697	0.00387913	0.0037783	0.00376081	0.00366096	0.0041427	0.00364847	0.00441114	0.00374139	0.558118	0.00378926	0.00428679	0.00376055	0.00398734	0.0037012	0.00370709	0.00364946	0.00368147	0.00376071	0.00372142	0.00368562	0.00379726	0.00374499	0.00370302	0.00375442	0.00373165	0.00371058	0.00381603	0.00371395	0.00372707	0.00459855	0.0042352
BMS536924	0.00360649	0.00380349	0.00359607	0.004145	0.00431977	0.00413477	0.00372843	0.00394124	0.00366332	0.00407068	0.00372384	0.00395688	0.00360412	0.00402938	0.00544951	0.00373859	0.00511988	0.00419603	0.0042668	0.00433317	0.00370713	0.00356629	0.00419606	0.00397864	0.00388219	0.00375676	0.00378926	0.557399	0.00654393	0.00381081	0.00400615	0.00375887	0.00362354	0.00370171	0.00364177	0.00361836	0.00361759	0.0037426	0.00366245	0.0037684	0.00382576	0.00383812	0.00362189	0.00358824	0.00405047	0.00360613	0.0036184	0.00372286	0.00409921
BMS754807	0.00363311	0.00381649	0.00360892	0.00411988	0.00373825	0.00471269	0.0037361	0.00370278	0.00360722	0.00414508	0.00386432	0.00395532	0.00365551	0.0052801	0.00437644	0.00392722	0.00465534	0.00420951	0.00528626	0.00384246	0.0036435	0.00360201	0.00455072	0.00425216	0.00396069	0.00368906	0.00428679	0.00654393	0.557601	0.00362938	0.00395456	0.00387215	0.0036709	0.00367797	0.00361274	0.00372084	0.00367666	0.00367742	0.00368491	0.00369188	0.003767	0.00371663	0.00405374	0.00362715	0.00391314	0.00378102	0.00365773	0.0040989	0.00449191
BORTEZOMIB	0.00372866	0.0039072	0.00384299	0.00357332	0.00382398	0.00364046	0.00405071	0.00378887	0.00514312	0.00395745	0.0038268	0.00358321	0.00390799	0.0036026	0.00358912	0.00382954	0.00374722	0.00355798	0.00354722	0.00393165	0.00408822	0.00378882	0.00367801	0.00391092	0.00378406	0.00377373	0.00376055	0.00381081	0.00362938	0.56058	0.00362771	0.00365132	0.0036535	0.00361846	0.00368244	0.0037118	0.00380406	0.003591	0.00374765	0.00368937	0.00365902	0.00358284	0.00484298	0.00372959	0.00367701	0.00500497	0.00376574	0.00457584	0.00362634
BOSUTINIB	0.00364296	0.00359152	0.00361689	0.00644464	0.00491696	0.0038326	0.00413279	0.00354243	0.00478148	0.00381443	0.00440884	0.0038724	0.00353906	0.00398306	0.00384835	0.00371111	0.00443212	0.00391447	0.0043687	0.00379484	0.00358011	0.00354701	0.00399515	0.00356563	0.0067099	0.00367649	0.00398734	0.00400615	0.00395456	0.00362771	0.558026	0.00377952	0.0036424	0.00385644	0.00377658	0.00372866	0.00368921	0.00427307	0.00362311	0.00375068	0.00373264	0.00444082	0.00352306	0.00358698	0.00385632	0.00351411	0.00362803	0.00358072	0.00416876
BRDK01737880	0.00372492	0.00458202	0.00371908	0.00378353	0.00377241	0.00526271	0.00375488	0.00384324	0.00372321	0.00373087	0.00374732	0.00402903	0.00387387	0.00377452	0.00365326	0.00383155	0.00418594	0.00370247	0.00576178	0.00379842	0.0037803	0.00388026	0.00380968	0.00380428	0.00375168	0.00377756	0.0037012	0.00375887	0.00387215	0.00365132	0.00377952	0.557089	0.00408504	0.00512003	0.00460741	0.00471923	0.00470973	0.00466744	0.00440506	0.00407242	0.00685417	0.00482287	0.00380364	0.00476985	0.00378467	0.00386071	0.00489924	0.00375574	0.00375435
BRDK02492147	0.00401486	0.00438137	0.0044655	0.0036189	0.00403422	0.00379865	0.00371254	0.00368462	0.0037397	0.00369688	0.00417334	0.00450956	0.00378492	0.00412794	0.00368657	0.003742	0.00366495	0.00365941	0.00413652	0.00359607	0.00430155	0.00395006	0.00366045	0.00367958	0.00364399	0.00499917	0.00370709	0.00362354	0.0036709	0.0036535	0.0036424	0.00408504	0.558224	0.00548794	0.00514075	0.00502292	0.00491197	0.00503949	0.00642238	0.00465	0.00404617	0.00467816	0.00418912	0.00707209	0.00416558	0.00422812	0.00734935	0.00372069	0.00384408
BRDK13999467	0.00429358	0.00410321	0.0040204	0.00373086	0.00388664	0.00384833	0.00363861	0.00364479	0.00372403	0.00360497	0.00371724	0.00433788	0.00372809	0.00370791	0.00359896	0.00372979	0.00366519	0.00359103	0.00402679	0.00371479	0.00381149	0.00391969	0.0037006	0.00362873	0.00375511	0.00450808	0.00364946	0.00370171	0.00367797	0.00361846	0.00385644	0.00512003	0.00548794	0.558916	0.00728765	0.00726143	0.00538649	0.00683677	0.00445941	0.00504682	0.00453158	0.00699033	0.00394811	0.00521813	0.00406207	0.00397638	0.00526065	0.0036551	0.0038137
BRDK14844214	0.00389262	0.00396074	0.00389887	0.00361706	0.00462016	0.00380737	0.00367985	0.0037118	0.00385084	0.00358532	0.00373628	0.00382483	0.0039035	0.00365312	0.00357311	0.00374394	0.00365481	0.00356554	0.00374746	0.003731	0.00388662	0.00452219	0.00369766	0.0036241	0.00378593	0.0039919	0.00368147	0.00364177	0.00361274	0.00368244	0.00377658	0.00460741	0.00514075	0.00728765	0.560088	0.00613186	0.0064934	0.00714535	0.00436044	0.00573537	0.00449376	0.00712577	0.00444768	0.00463431	0.00381774	0.00442206	0.0045076	0.00374385	0.00369207
BRDK27224038	0.00372123	0.00396896	0.00417523	0.0036186	0.00384092	0.00371259	0.00374416	0.00357956	0.00374082	0.0036348	0.00409625	0.00373113	0.00378032	0.00363635	0.00371438	0.00412973	0.00370699	0.00364624	0.00374678	0.00369444	0.00364705	0.00384228	0.00370111	0.00363313	0.0038414	0.00454213	0.00376071	0.00361836	0.00372084	0.0037118	0.00372866	0.00471923	0.00502292	0.00726143	0.00613186	0.558358	0.00605751	0.00472895	0.00507449	0.0054422	0.00494007	0.00480499	0.00468405	0.0057625	0.00407568	0.00472272	0.00563578	0.00368361	0.00369099
BRDK27986637	0.00379887	0.00385044	0.00422338	0.00359258	0.00440837	0.00372083	0.00382632	0.0036874	0.00392846	0.00365521	0.00403585	0.00369971	0.00394709	0.00362197	0.00356299	0.00380841	0.00369581	0.00354562	0.00370282	0.00372245	0.00368145	0.00495038	0.00368561	0.00368074	0.00378748	0.00415207	0.00372142	0.00361759	0.00367666	0.00380406	0.00368921	0.00470973	0.00491197	0.00538649	0.0064934	0.00605751	0.559661	0.0043467	0.00497048	0.00475725	0.00472397	0.00462467	0.00464899	0.00570777	0.00411425	0.00469957	0.00575967	0.0037219	0.00368599
BRDK33514849	0.00411954	0.00388624	0.00365195	0.00383146	0.0038354	0.00385269	0.00362529	0.00387128	0.0037918	0.00368836	0.00375266	0.00398858	0.00383462	0.00420433	0.003701	0.00373067	0.00373629	0.00373134	0.00393468	0.00381099	0.00438905	0.00385557	0.00377796	0.00364023	0.00390828	0.003798	0.00368562	0.0037426	0.00367742	0.003591	0.00427307	0.00466744	0.00503949	0.00683677	0.00714535	0.00472895	0.0043467	0.558287	0.00456557	0.00454771	0.00451008	0.00917059	0.00390513	0.00405706	0.00371803	0.00377891	0.00401737	0.00373666	0.00389573
BRDK49290616	0.00382645	0.00378487	0.00455215	0.00360972	0.00382682	0.00375629	0.00378215	0.00368853	0.00392571	0.0036664	0.00387396	0.00413543	0.00395028	0.00444289	0.00363688	0.00367855	0.0037149	0.00361571	0.00385221	0.00366664	0.0044475	0.00390959	0.00371314	0.00364155	0.0036577	0.00463954	0.00379726	0.00366245	0.00368491	0.00374765	0.00362311	0.00440506	0.00642238	0.00445941	0.00436044	0.00507449	0.00497048	0.00456557	0.556632	0.00504041	0.00484688	0.00396842	0.00445452	0.00669218	0.00440012	0.00435245	0.00663343	0.00368542	0.00396654
BRDK50799972	0.00373547	0.00430654	0.00396074	0.00367936	0.00437856	0.00380136	0.00371748	0.00368143	0.00394259	0.0036215	0.00377549	0.0038296	0.00374668	0.00368457	0.00364796	0.00375662	0.00369682	0.00363883	0.00442048	0.00425874	0.0037395	0.00382209	0.00375928	0.0036959	0.00383378	0.00442607	0.00374499	0.0037684	0.00369188	0.00368937	0.00375068	0.00407242	0.00465	0.00504682	0.00573537	0.0054422	0.00475725	0.00454771	0.00504041	0.559525	0.00555713	0.00531158	0.00391599	0.00523684	0.00414938	0.00395573	0.00494405	0.00373462	0.00376419
BRDK55116708	0.00371165	0.00400368	0.00373666	0.00367377	0.00377046	0.00391079	0.00369792	0.00378679	0.00391693	0.00369525	0.00370651	0.0037234	0.00374385	0.00367378	0.00412236	0.00396269	0.0044154	0.00384178	0.00398551	0.00392875	0.00395146	0.00372683	0.00389304	0.00425119	0.00372674	0.00383558	0.00370302	0.00382576	0.003767	0.00365902	0.00373264	0.00685417	0.00404617	0.00453158	0.00449376	0.00494007	0.00472397	0.00451008	0.00484688	0.00555713	0.559147	0.00501032	0.00381407	0.00489811	0.00399726	0.00394617	0.00480476	0.00371698	0.00370956
BRDK63431240	0.00377452	0.00393153	0.00362408	0.00391616	0.00382603	0.00387233	0.0037195	0.00362226	0.00369032	0.00367964	0.00369464	0.00411038	0.00371992	0.00375867	0.00369043	0.00369376	0.00383549	0.00365814	0.00400429	0.00409101	0.0038168	0.00378657	0.00388075	0.00361297	0.00441385	0.00376943	0.00375442	0.00383812	0.00371663	0.00358284	0.00444082	0.00482287	0.00467816	0.00699033	0.00712577	0.00480499	0.00462467	0.00917059	0.00396842	0.00531158	0.00501032	0.560167	0.00376352	0.00401715	0.00375345	0.00369858	0.0040268	0.0042466	0.00375723
BRDK71935468	0.00369056	0.00393089	0.00394953	0.00354645	0.00377709	0.00365639	0.00408014	0.00381367	0.00384032	0.00363257	0.00374717	0.00359219	0.00409505	0.00367245	0.00352024	0.003692	0.00358155	0.00347168	0.00359941	0.00379396	0.00379359	0.00391139	0.00411888	0.00388548	0.00362769	0.00461453	0.00373165	0.00362189	0.00405374	0.00484298	0.00352306	0.00380364	0.00418912	0.00394811	0.00444768	0.00468405	0.00464899	0.00390513	0.00445452	0.00391599	0.00381407	0.00376352	0.559975	0.00519725	0.00372296	0.0135748	0.0043322	0.0042893	0.00363254
BRDK86535717	0.0038912	0.00383518	0.00430949	0.00357878	0.0039481	0.00375947	0.00394308	0.00361162	0.00376792	0.00363136	0.00407069	0.00387618	0.00397467	0.0037928	0.00359852	0.00370484	0.00367188	0.00359243	0.00382582	0.00364422	0.00379393	0.00393837	0.00367886	0.00362825	0.00366511	0.00495006	0.00371058	0.00358824	0.00362715	0.00372959	0.00358698	0.00476985	0.00707209	0.00521813	0.00463431	0.0057625	0.00570777	0.00405706	0.00669218	0.00523684	0.00489811	0.00401715	0.00519725	0.557106	0.00445092	0.0052891	0.00770462	0.0036842	0.00369121
BRDK88742110	0.00452552	0.00372208	0.0039014	0.00425327	0.00387243	0.00376952	0.00378659	0.00370603	0.00395705	0.00404968	0.00378263	0.00429628	0.00396364	0.00377395	0.0038518	0.00384329	0.00416203	0.00371704	0.00380139	0.00462628	0.00378464	0.00375842	0.00420828	0.00369458	0.00381725	0.00391621	0.00381603	0.00405047	0.00391314	0.00367701	0.00385632	0.00378467	0.00416558	0.00406207	0.00381774	0.00407568	0.00411425	0.00371803	0.00440012	0.00414938	0.00399726	0.00375345	0.00372296	0.00445092	0.558487	0.00374019	0.00451059	0.00362763	0.00451045
BRDK94991378	0.00371483	0.00381972	0.0039882	0.00353326	0.00378408	0.00365533	0.00408781	0.00380448	0.00385455	0.00364335	0.00378032	0.00360585	0.0039882	0.00366034	0.0035436	0.00367734	0.00359559	0.00348439	0.00357343	0.00376858	0.00379726	0.00389739	0.00387915	0.00382816	0.00361376	0.00485959	0.00371395	0.00360613	0.00378102	0.00500497	0.00351411	0.00386071	0.00422812	0.00397638	0.00442206	0.00472272	0.00469957	0.00377891	0.00435245	0.00395573	0.00394617	0.00369858	0.0135748	0.0052891	0.00374019	0.55973	0.00439259	0.00401363	0.00360848
BRDK96431673	0.0038622	0.00385023	0.00430704	0.0035838	0.00436718	0.00378349	0.00387915	0.00362038	0.00382416	0.00365655	0.00420491	0.00388234	0.00398003	0.00372507	0.00361588	0.00372797	0.00372493	0.00360989	0.00422904	0.00367997	0.00373191	0.00396664	0.00366831	0.00367242	0.00371448	0.00477167	0.00372707	0.0036184	0.00365773	0.00376574	0.00362803	0.00489924	0.00734935	0.00526065	0.0045076	0.00563578	0.00575967	0.00401737	0.00663343	0.00494405	0.00480476	0.0040268	0.0043322	0.00770462	0.00451059	0.00439259	0.557438	0.00372205	0.00372052
BREFELDINA	0.00381967	0.00529664	0.00377449	0.00356566	0.00370837	0.00368012	0.00432439	0.00379702	0.00381886	0.00378665	0.0045447	0.00361029	0.00446524	0.00361832	0.00363659	0.00382838	0.00373795	0.00396958	0.00363481	0.00393845	0.00393899	0.00465232	0.00370059	0.00391205	0.00373483	0.00371855	0.00459855	0.00372286	0.0040989	0.00457584	0.00358072	0.00375574	0.00372069	0.0036551	0.00374385	0.00368361	0.0037219	0.00373666	0.00368542	0.00373462	0.00371698	0.0042466	0.0042893	0.0036842	0.00362763	0.00401363	0.00372205	0.558958	0.00366596
BRIVANIB	0.00522927	0.00367126	0.00368162	0.00402816	0.00378771	0.00392659	0.0037153	0.00490262	0.00371543	0.00379659	0.00376718	0.0042679	0.0041784	0.0040094	0.0037658	0.00438394	0.0037657	0.00384301	0.00478363	0.00378972	0.00397499	0.00383815	0.00380108	0.00380123	0.00379594	0.00368583	0.0042352	0.00409921	0.00449191	0.00362634	0.00416876	0.00375435	0.00384408	0.0038137	0.00369207	0.00369099	0.00368599	0.00389573	0.00396654	0.00376419	0.00370956	0.00375723	0.00363254	0.00369121	0.00451045	0.00360848	0.00372052	0.00366596	0.559528
CANERTINIB	0.00363878	0.00356321	0.00354036	0.00943743	0.00417582	0.00389746	0.00362582	0.00356771	0.00357475	0.00409011	0.00391519	0.0039314	0.00347545	0.00408712	0.0040584	0.00419591	0.00433446	0.00392971	0.00523421	0.00372612	0.00352135	0.00351219	0.00407599	0.00358423	0.00440153	0.00382201	0.0036275	0.00415211	0.00420986	0.00357472	0.00666603	0.00371597	0.00357959	0.0036763	0.00357387	0.00366023	0.00359021	0.00378431	0.0035649	0.00361543	0.00365281	0.00384369	0.00347943	0.00352303	0.00466407	0.00349748	0.0035443	0.00348964	0.00404658
CAY10594	0.00381085	0.00546293	0.00369132	0.00406289	0.00400194	0.00385139	0.00364125	0.00399289	0.00387824	0.00374709	0.00368317	0.00372453	0.00384937	0.00366758	0.00379366	0.00413782	0.00420592	0.003646	0.00388191	0.00510998	0.0037922	0.00386906	0.0042964	0.00402989	0.00397737	0.00369203	0.00364695	0.00393043	0.00377631	0.00391406	0.00417428	0.00459521	0.00369354	0.00377003	0.00374653	0.00372851	0.00378314	0.00385995	0.00377905	0.00384852	0.00447602	0.00427631	0.0040854	0.00379737	0.00379915	0.00373723	0.00417613	0.00482186	0.0037583
CAY10618	0.00412989	0.0039674	0.00380027	0.00362951	0.0042539	0.00383587	0.00384968	0.00386869	0.00393896	0.00434553	0.00375573	0.00379917	0.00397869	0.0036561	0.0035912	0.00386436	0.00365939	0.00372916	0.0036717	0.00395539	0.00402322	0.00379994	0.00371303	0.00495244	0.00369041	0.00377182	0.00376878	0.00369224	0.00401331	0.00468926	0.00368062	0.00376418	0.00367241	0.00366111	0.0036977	0.00368779	0.0042865	0.00362343	0.0037021	0.00371896	0.00381037	0.00367666	0.00430734	0.00373759	0.00378317	0.00414531	0.00376324	0.00404796	0.00428416
CCT036477	0.00386261	0.00395866	0.00376457	0.00366986	0.00397579	0.00384467	0.00375153	0.00382029	0.00413651	0.0042453	0.00372675	0.00386823	0.00385528	0.00471802	0.00369587	0.00373065	0.00367026	0.00376911	0.00375855	0.00390839	0.00462344	0.00383055	0.00378244	0.00418905	0.00384805	0.00378229	0.00435388	0.00376433	0.00370316	0.0037937	0.00373864	0.0038143	0.00388953	0.00381752	0.00386908	0.00372885	0.00372052	0.00459331	0.00456279	0.00388609	0.00382162	0.00386336	0.00383394	0.00386138	0.00388967	0.00383042	0.00374752	0.00371416	0.00381829
CD1530	0.00438615	0.00416928	0.00643963	0.00347765	0.00432728	0.00374931	0.00379023	0.00599577	0.00379053	0.00430015	0.00374937	0.00359435	0.00432944	0.00360502	0.00355357	0.00385635	0.00353421	0.00356444	0.00364787	0.00456189	0.0037875	0.00433942	0.00360567	0.00471885	0.00366728	0.00391947	0.00365514	0.00364835	0.00362225	0.00412794	0.00352163	0.0041536	0.00365267	0.00361788	0.00373389	0.00368509	0.00370404	0.00354151	0.003698	0.00368031	0.00371042	0.00354648	0.00484299	0.00371186	0.00367847	0.00482282	0.00371927	0.00409943	0.0036765
CD437	0.00436298	0.00389014	0.00596384	0.00346514	0.00374865	0.00384791	0.00408375	0.00486431	0.00379043	0.00427776	0.0037213	0.00358705	0.0041366	0.00361516	0.00351052	0.00375511	0.00364834	0.00353207	0.00373172	0.00464967	0.00377405	0.00399262	0.00382363	0.00422891	0.00367608	0.00381783	0.00389896	0.00361106	0.00355454	0.00405123	0.003529	0.00392579	0.00360253	0.00354931	0.00358981	0.00360378	0.00367707	0.00352343	0.00363441	0.00364526	0.00367488	0.00356385	0.00397559	0.00362778	0.00367564	0.00399561	0.00366087	0.00390698	0.00363277
CEDIRANIB	0.00373089	0.00369372	0.00357521	0.00515334	0.00378579	0.00404029	0.00363864	0.00365862	0.00361601	0.00396355	0.00367597	0.00518633	0.00352946	0.0044886	0.00392732	0.00369826	0.00408159	0.00394561	0.00532648	0.00389121	0.0036324	0.00357227	0.00436871	0.00368309	0.00463113	0.00366676	0.00391047	0.00422196	0.00418364	0.00348766	0.00502824	0.00417592	0.0037279	0.00465659	0.00386458	0.00372132	0.00364542	0.00411309	0.00362488	0.00388851	0.00377546	0.00482056	0.00349801	0.00361023	0.00384914	0.00348511	0.00364849	0.0036058	0.00533779
CERULENIN	0.00391531	0.0044524	0.00388088	0.0035832	0.00373513	0.00391318	0.00375711	0.00426511	0.00408772	0.00369924	0.0041936	0.00362643	0.00390226	0.00375845	0.0035566	0.00384398	0.00357359	0.00359069	0.00358521	0.00386678	0.00452042	0.00503974	0.00365026	0.00386501	0.00367256	0.00426394	0.00367558	0.00356406	0.0036593	0.00437799	0.00352727	0.00380249	0.00383793	0.00377409	0.00375919	0.00382268	0.003808	0.0037311	0.00383365	0.00374863	0.0037339	0.00360088	0.00505833	0.00383352	0.00361762	0.00503822	0.0037637	0.00467735	0.00366932
CHIR99021	0.00402401	0.00392616	0.00376629	0.00375796	0.00381438	0.0046622	0.00372676	0.00366729	0.00383748	0.00382163	0.00382179	0.00393773	0.00370784	0.00480917	0.00377117	0.00368588	0.00372668	0.00435965	0.00386131	0.00368565	0.0043855	0.00386751	0.00372265	0.00367943	0.00377812	0.00407152	0.00449945	0.00380102	0.00386936	0.0037009	0.00381567	0.00373926	0.00444849	0.00406986	0.00394218	0.00398595	0.00396424	0.00526241	0.00469016	0.00392779	0.00378345	0.00402527	0.00375593	0.00432468	0.0038765	0.00374379	0.004049	0.00368582	0.00392576
CHLORAMBUCIL	0.00392872	0.00373967	0.00461321	0.00373211	0.00374885	0.00405455	0.00390596	0.00522619	0.0037958	0.00424674	0.0036933	0.0041225	0.00391101	0.00431385	0.00361403	0.00427689	0.00365775	0.00353946	0.00422097	0.00370768	0.00400807	0.00392156	0.0037552	0.00446874	0.00361115	0.00454019	0.00381178	0.00364483	0.00365168	0.00370833	0.00352807	0.00398377	0.00375353	0.00367766	0.00365954	0.00362605	0.0037027	0.00370484	0.00399483	0.00369636	0.00373271	0.00362671	0.00375084	0.00400729	0.00369739	0.00375651	0.00377483	0.00375834	0.00373182
CI976	0.00391393	0.00397647	0.0040994	0.00371293	0.00435778	0.00373914	0.00367771	0.00432232	0.00380217	0.0037513	0.00380283	0.00372596	0.00418843	0.00365521	0.00356411	0.00421365	0.00364836	0.00381431	0.00367373	0.00386371	0.00391557	0.00464649	0.00373531	0.00506855	0.00372029	0.00433331	0.0036064	0.00368808	0.00375969	0.00382184	0.00369204	0.00389689	0.00358877	0.00362852	0.00366441	0.00362098	0.00372661	0.00363166	0.00363074	0.00362691	0.00386657	0.00362247	0.00391764	0.00364463	0.0037198	0.00388525	0.0036403	0.0039581	0.00379009
CICLOPIROX	0.0038023	0.0037521	0.00379274	0.00358338	0.00368277	0.00381555	0.00381628	0.00389282	0.00381455	0.0037743	0.00385319	0.00377628	0.00396213	0.00416362	0.00423184	0.00375175	0.00364153	0.00387164	0.00378295	0.00374296	0.00426242	0.00390571	0.00367642	0.00384527	0.00369104	0.00376059	0.00375349	0.00368205	0.0036062	0.00394276	0.00355917	0.0040008	0.00391014	0.00359252	0.00364764	0.00362893	0.00361884	0.00374751	0.00383083	0.00364482	0.00373138	0.0036284	0.00374723	0.00379967	0.00370756	0.00377868	0.00396774	0.00416435	0.00374164
CIMETIDINE	0.00459906	0.0045077	0.00415877	0.00370829	0.00388498	0.00386204	0.00368551	0.00383545	0.00374769	0.00371789	0.00370588	0.00462122	0.00380925	0.00406446	0.00364341	0.00376056	0.0036593	0.00366117	0.00379683	0.00368051	0.00384021	0.00473897	0.00367136	0.00426534	0.00368372	0.0039012	0.0040628	0.00374147	0.00375073	0.00371355	0.00372301	0.00377266	0.00395949	0.0039466	0.00391553	0.00388377	0.00459134	0.00382796	0.00414736	0.00384988	0.00372084	0.00375088	0.00373703	0.00443662	0.00388208	0.0037428	0.00392896	0.00368535	0.00390585
CLOFARABINE	0.00370481	0.0037274	0.00386679	0.00377635	0.00375687	0.00389791	0.00409994	0.00383562	0.00378551	0.00373747	0.00376683	0.00362363	0.00453381	0.00392949	0.00366666	0.00366231	0.00370539	0.00374131	0.00393423	0.00387332	0.00366682	0.00370076	0.00391386	0.0037616	0.00373287	0.00371943	0.00405722	0.00360116	0.00369972	0.00393686	0.0036457	0.00409891	0.00366243	0.00359627	0.0036566	0.00372975	0.00375632	0.00358353	0.00376516	0.00372734	0.00370947	0.00362337	0.00380023	0.00371429	0.00370318	0.00379867	0.00373428	0.00380213	0.00372769
COL3	0.00432851	0.00425107	0.00476427	0.00346448	0.00377491	0.00375009	0.00379388	0.00516718	0.00377083	0.00385305	0.00380739	0.00357872	0.00462198	0.00356696	0.00348775	0.00452358	0.00354674	0.00354293	0.00358145	0.00426474	0.00376085	0.00454556	0.00358897	0.00459885	0.0035619	0.0039592	0.003649	0.00365534	0.00394141	0.00384578	0.00346443	0.00379987	0.0036332	0.00362257	0.00381055	0.00368634	0.00371038	0.00352308	0.00370152	0.00370368	0.00369985	0.00354942	0.004116	0.0036666	0.00372468	0.00409828	0.00372028	0.00431587	0.00370024
CRIZOTINIB	0.00368285	0.00367988	0.00361122	0.00430494	0.00382627	0.0042029	0.00411477	0.0036265	0.00366359	0.00545032	0.00447061	0.00402967	0.00363577	0.00394406	0.0046451	0.00420813	0.00481805	0.00401235	0.00474086	0.00477435	0.00364018	0.00358632	0.00406428	0.00364759	0.00446028	0.00368872	0.00395718	0.00498645	0.00522402	0.00362844	0.00438613	0.00389839	0.00361143	0.00368279	0.0036109	0.00367927	0.0037365	0.00374864	0.00358343	0.00370116	0.00380416	0.0038713	0.00355018	0.00357263	0.00401211	0.00356041	0.00360944	0.00408313	0.00449444
CUCURBITACINI	0.00427296	0.00445506	0.00391024	0.00360279	0.00372656	0.0037077	0.00382003	0.0039192	0.0040778	0.00432506	0.00419743	0.00359676	0.00429873	0.00367741	0.00361784	0.00375975	0.00364323	0.00378561	0.00358193	0.00441096	0.00390016	0.00529205	0.00367273	0.00389733	0.00407061	0.00377588	0.00375085	0.00363275	0.00378218	0.0051498	0.00363876	0.00371511	0.00370021	0.00366138	0.00372851	0.00371409	0.00377251	0.0036426	0.00367855	0.00369061	0.00367132	0.00360961	0.0047803	0.00369735	0.003633	0.00486743	0.00370702	0.00503169	0.00362322
CURCUMIN	0.00423293	0.00377696	0.0039281	0.00368849	0.00373379	0.0037734	0.00545721	0.00383463	0.00384204	0.00396516	0.00499743	0.00366109	0.00373943	0.00365545	0.00376402	0.0044516	0.00418731	0.00362043	0.00387721	0.00372581	0.00434127	0.00390713	0.00389207	0.00422979	0.00385767	0.00379168	0.00446746	0.00373614	0.00377147	0.00413564	0.0038938	0.00406119	0.00369821	0.00364543	0.00365832	0.00402731	0.00408308	0.00366938	0.00367056	0.00367838	0.00371831	0.00370023	0.00390438	0.0037025	0.0038116	0.00391915	0.00369553	0.00444211	0.00372719
CYANOQUINOLINE11	0.00370704	0.00375966	0.0038423	0.00602878	0.00397734	0.00391585	0.00371641	0.00368723	0.00371543	0.00378889	0.00378449	0.00382798	0.00366781	0.00410564	0.00381685	0.00372779	0.00377932	0.00390489	0.00406715	0.00376061	0.00364655	0.00369119	0.00378753	0.00372723	0.00395582	0.00388759	0.00416213	0.00439424	0.00399805	0.00387091	0.00569739	0.00385454	0.00371872	0.00431838	0.00376948	0.00380861	0.00376917	0.00379172	0.00378638	0.00373724	0.00388474	0.00382795	0.00430701	0.00379745	0.00381715	0.00432295	0.00369884	0.00367239	0.00383868
CYCLOPHOSPHAMIDE	0.00461258	0.00372909	0.00390654	0.00359833	0.00373352	0.00373604	0.00373322	0.00388679	0.0039041	0.00369696	0.00374796	0.00378854	0.00400103	0.00472392	0.00378484	0.00387893	0.00367985	0.00357979	0.00362952	0.00372526	0.00465272	0.00464559	0.0036751	0.00380035	0.00367415	0.00390832	0.00370315	0.00362041	0.00361196	0.00376915	0.00358248	0.00368974	0.0038339	0.00374599	0.00378291	0.00371585	0.00397481	0.00406702	0.0040057	0.00369781	0.00377889	0.00368127	0.00380009	0.00385943	0.00373835	0.00375337	0.00371869	0.0037174	0.00388041
CYTOCHALASINB	0.00369594	0.00391696	0.00379231	0.00369453	0.00371215	0.00441919	0.00396681	0.00371245	0.00370372	0.00491175	0.005544	0.00384105	0.00381474	0.0038141	0.00404547	0.00443053	0.00416972	0.0040499	0.00433436	0.00379043	0.0036964	0.00383857	0.00377847	0.00395746	0.00371836	0.003826	0.00380235	0.0045894	0.00565715	0.00369451	0.00369999	0.00433301	0.00447134	0.00376394	0.0037517	0.003909	0.00385289	0.00367598	0.00414783	0.00384847	0.0039098	0.00369936	0.00424471	0.00424322	0.00423739	0.00429366	0.00438314	0.00439471	0.00372798
DABRAFENIB	0.00440348	0.00424301	0.00371237	0.00370481	0.0046445	0.00455726	0.00361882	0.00377612	0.00428006	0.00371296	0.00367644	0.00394827	0.0038105	0.00394706	0.00372598	0.00382864	0.00370599	0.0038394	0.00376215	0.00372968	0.00495413	0.00393372	0.00370165	0.00373122	0.00372679	0.00379444	0.00379608	0.00385078	0.00377558	0.00365792	0.00375554	0.00375762	0.00398301	0.0043523	0.00412415	0.00373818	0.00376795	0.00468482	0.00416483	0.00385433	0.00373389	0.00399635	0.00377758	0.00454832	0.00375849	0.00376628	0.00409041	0.00366908	0.00407334
DACARBAZINE	0.00392747	0.00375727	0.00400062	0.0036343	0.00434971	0.00386156	0.00373707	0.00372763	0.00379836	0.00366053	0.00368929	0.00382477	0.00390552	0.00382511	0.00359607	0.00365861	0.00360558	0.00363195	0.00384683	0.00367225	0.00377033	0.0038952	0.00368581	0.00371529	0.00369215	0.00459712	0.00428264	0.00369988	0.00370383	0.00376865	0.00370005	0.00377559	0.00424762	0.00455424	0.00400051	0.00428551	0.00426641	0.00390514	0.00463722	0.00408117	0.00378929	0.00420413	0.00383078	0.00480533	0.00394415	0.00382827	0.00490023	0.00368497	0.0038679
DARINAPARSIN	0.00372293	0.00382235	0.00448697	0.00353185	0.00388007	0.00364178	0.00368809	0.00379978	0.0043164	0.00370272	0.00405803	0.00365529	0.00446912	0.00362302	0.00372342	0.00450471	0.0037209	0.00365779	0.00362555	0.00373681	0.00374689	0.0039674	0.00362556	0.00450601	0.00378251	0.0039166	0.00369297	0.00362354	0.00375208	0.00465861	0.0035939	0.00378505	0.00410225	0.00395985	0.00393593	0.0046718	0.00408601	0.00372229	0.00398178	0.0039257	0.00378357	0.00368236	0.00386439	0.00402329	0.0037544	0.00387405	0.00411291	0.00379991	0.00387013
DASATINIB	0.00364072	0.00368361	0.00358296	0.00521234	0.00385288	0.0039281	0.00368419	0.00358061	0.00362327	0.00392918	0.00387043	0.00395351	0.00356409	0.00460567	0.00450685	0.00380424	0.00499933	0.00409397	0.00438123	0.00371632	0.00359382	0.00353828	0.0044671	0.00364975	0.00416531	0.00369669	0.00378971	0.00418406	0.0047062	0.00357409	0.00524115	0.00373527	0.00365342	0.00372632	0.00366321	0.00392309	0.00365219	0.00380473	0.0036535	0.00371909	0.00381295	0.00381639	0.00355517	0.00360538	0.00394251	0.00353886	0.00361962	0.00362343	0.00385717
DECITABINE	0.00385628	0.00376962	0.00429164	0.003516	0.00450391	0.00386236	0.00382618	0.00374959	0.00489494	0.00369884	0.00386639	0.00363972	0.00803079	0.00376195	0.00374185	0.00366682	0.00368157	0.00357316	0.00429041	0.00377689	0.00420326	0.00433356	0.00368557	0.00369106	0.00378309	0.00386996	0.00378894	0.003642	0.00367315	0.00391026	0.00367834	0.00437436	0.00376975	0.0037573	0.00423825	0.00378403	0.00386735	0.00376008	0.00401205	0.00378494	0.00381708	0.00371042	0.00375045	0.00395884	0.00394902	0.00375217	0.00397944	0.003888	0.00376963
DEXAMETHASONE	0.00446953	0.00379568	0.00455476	0.00354862	0.0038163	0.00366549	0.00378173	0.00382903	0.00385277	0.0036709	0.00411167	0.00363841	0.00427568	0.00389342	0.00356965	0.00374414	0.00355302	0.00358155	0.00360142	0.00367829	0.00392336	0.00578204	0.00359913	0.00378402	0.00366974	0.00433338	0.00372839	0.00355275	0.003568	0.00384258	0.00358519	0.00366911	0.00376879	0.00378282	0.00384869	0.00377475	0.00432713	0.00368885	0.00382451	0.0037361	0.00366666	0.00363108	0.00381195	0.00384717	0.00376371	0.00383087	0.00381726	0.00474287	0.00370836
DOCETAXEL	0.00403886	0.00364079	0.00380683	0.00359172	0.00368605	0.00414294	0.0047259	0.00377602	0.00380106	0.00381508	0.0046435	0.0041382	0.00371925	0.00446114	0.00367718	0.00366512	0.00431952	0.00366299	0.00392122	0.00363698	0.00435299	0.00385453	0.005147	0.00364069	0.00369942	0.00393255	0.0044364	0.00370408	0.00372914	0.0037172	0.00365017	0.00377753	0.00412784	0.00366022	0.00368135	0.00373317	0.00376495	0.00388501	0.00464437	0.00371746	0.00365659	0.00363967	0.00431654	0.00464742	0.00371259	0.004428	0.00409878	0.00399744	0.00376037
DOXORUBICIN	0.00376237	0.0036211	0.00391798	0.00349857	0.00371191	0.0038841	0.0080077	0.00383268	0.00385514	0.00376596	0.00419242	0.00364297	0.00379402	0.00369337	0.00363357	0.00367734	0.00405102	0.00359959	0.00416418	0.00368694	0.00372007	0.00371419	0.00421616	0.00368115	0.00421651	0.00398855	0.00607807	0.0036791	0.00370905	0.0037404	0.00386457	0.0038752	0.00372604	0.00360718	0.00365905	0.00382476	0.00387029	0.00357805	0.00384797	0.00375507	0.00366272	0.00364857	0.00448713	0.00403092	0.00373583	0.00451908	0.00387102	0.00396271	0.00363356
ENTINOSTAT	0.00381944	0.00391012	0.0037613	0.00358462	0.00379001	0.00371713	0.00396048	0.00471179	0.00558643	0.00375568	0.00366883	0.00395013	0.00370445	0.0037515	0.00381352	0.00417903	0.0041181	0.00379526	0.00365481	0.00397192	0.00622771	0.00373791	0.00516962	0.00401756	0.00373975	0.00368479	0.00417291	0.00386661	0.00368439	0.0040071	0.00362262	0.00392905	0.00362279	0.00372508	0.00366545	0.00370848	0.00363647	0.00374098	0.00370988	0.00376905	0.00500502	0.00373997	0.00363688	0.00363098	0.00448493	0.00365545	0.00361937	0.00377943	0.00371694
ERASTIN	0.00376351	0.00442282	0.00380392	0.0039288	0.00385777	0.00381518	0.00375491	0.00414888	0.00385937	0.0037034	0.00377199	0.00366417	0.00416459	0.00390382	0.00381888	0.00442016	0.00380309	0.00363232	0.00375464	0.00398838	0.00385423	0.00386271	0.00374878	0.00424167	0.00369025	0.00457404	0.00368314	0.00380589	0.00378754	0.00405378	0.00365973	0.00455136	0.00367816	0.00373987	0.00374547	0.00373593	0.0038212	0.00381995	0.00370879	0.00375266	0.00463674	0.00376381	0.0039746	0.0037471	0.00370078	0.00397229	0.00376624	0.0040344	0.00368314
ERISMODEGIB	0.00636768	0.00379315	0.00371829	0.00387419	0.00384643	0.00388677	0.00374088	0.00390513	0.00376404	0.00387999	0.00427267	0.00384677	0.00418148	0.00378736	0.00426312	0.00495653	0.00391761	0.00469845	0.00383545	0.00372191	0.0037614	0.00384689	0.00416313	0.00383869	0.00387604	0.0037817	0.00385486	0.00379056	0.00379151	0.00366111	0.00400545	0.0039214	0.00373316	0.00380769	0.00381715	0.00413764	0.00374404	0.00424553	0.00373356	0.00398117	0.0043102	0.0038497	0.0036017	0.00370519	0.00412657	0.00357602	0.00371604	0.00368292	0.00456211
ERLOTINIB	0.00373745	0.00358882	0.00357476	0.00751919	0.00393903	0.00386467	0.00369149	0.00354378	0.00361323	0.00395193	0.00432757	0.00399751	0.00350008	0.00431906	0.00399127	0.00386512	0.0041896	0.00410327	0.00508121	0.00370264	0.00351964	0.00352155	0.00407929	0.00356795	0.00503955	0.00372881	0.00368811	0.00413576	0.00419186	0.00353568	0.00711281	0.00372587	0.00363079	0.00372029	0.00362185	0.0037653	0.00366622	0.00382898	0.00363555	0.00368124	0.00374229	0.00386519	0.00346742	0.00357437	0.00446978	0.00347033	0.00359776	0.00352937	0.004224
ETOMOXIR	0.00376814	0.00393747	0.00415469	0.0036968	0.00378902	0.00376314	0.00377595	0.00368537	0.00373999	0.00368182	0.00402255	0.0037274	0.00398662	0.00369901	0.00365556	0.00410801	0.00362784	0.00431137	0.00370813	0.00363158	0.00370207	0.0045563	0.00361974	0.00382516	0.00365626	0.00568634	0.00369578	0.0036686	0.00365184	0.00375271	0.00366432	0.00459204	0.00474285	0.00477199	0.00399797	0.00441035	0.00430256	0.00379699	0.00480931	0.00410885	0.00440859	0.0037663	0.00399375	0.00525939	0.00388719	0.0040767	0.00474283	0.00429921	0.00367448
ETOPOSIDE	0.0037234	0.00370233	0.00429233	0.00353739	0.00376373	0.00440831	0.00511442	0.0037378	0.00406077	0.00375269	0.00527272	0.00367539	0.00382799	0.00370445	0.00361246	0.00374902	0.00374443	0.00365427	0.00432592	0.00367792	0.00371563	0.00392249	0.00387444	0.00365111	0.00447161	0.00388822	0.0046719	0.00358656	0.00369533	0.00369343	0.00432994	0.00441717	0.00383803	0.00366668	0.00369878	0.0038207	0.00430677	0.00361174	0.00381853	0.00377468	0.00371773	0.00364945	0.00379623	0.00384802	0.00367604	0.00382972	0.00386678	0.0041522	0.00363706
EX527	0.00545933	0.00386935	0.00387557	0.00363448	0.00391834	0.0037486	0.00371564	0.00449323	0.0052173	0.00421257	0.00380311	0.00376406	0.00495851	0.00374357	0.00360037	0.00380168	0.00361437	0.00358343	0.00362095	0.00392166	0.00412169	0.00455525	0.00370409	0.00382708	0.00391811	0.00396857	0.00374004	0.00369875	0.00362941	0.00408522	0.00380614	0.00371409	0.00379964	0.0038594	0.00405744	0.00383039	0.00439897	0.00374963	0.00390853	0.00390714	0.00371634	0.00369584	0.00384971	0.00385787	0.00449725	0.00386965	0.00381736	0.00380868	0.00408808
FGIN127	0.00394068	0.00392281	0.00438658	0.00365638	0.00427972	0.00409588	0.0036635	0.00372444	0.00461089	0.00377028	0.00376223	0.00423769	0.00370444	0.00399186	0.00364873	0.00372901	0.00366461	0.00366803	0.00385878	0.00386737	0.0037769	0.00398496	0.00370035	0.00417492	0.00369095	0.0049131	0.00376098	0.00379277	0.00397128	0.00389578	0.00367508	0.00378696	0.00591223	0.00483908	0.00411381	0.00464254	0.00425588	0.00420723	0.00528275	0.00499312	0.00388515	0.00386666	0.00462507	0.00548321	0.00450992	0.00471104	0.00552531	0.00370304	0.003884
FLUOROURACIL	0.00387721	0.00368201	0.0047852	0.00364936	0.00374649	0.00388338	0.00403401	0.0037944	0.00386284	0.00372835	0.00371311	0.00374308	0.00416941	0.00380884	0.00375648	0.00363796	0.00370861	0.00357208	0.00406887	0.00367555	0.00418358	0.00385506	0.00373507	0.00381043	0.0036617	0.00480069	0.00392137	0.00368662	0.00365799	0.00412044	0.0035647	0.00384465	0.00374294	0.00368173	0.0036662	0.003643	0.00374957	0.00366486	0.00386048	0.00366818	0.00364563	0.00365228	0.00375646	0.00390992	0.00374139	0.00376755	0.0038327	0.00384542	0.0037471
FLUVASTATIN	0.0044927	0.00375185	0.00390449	0.00368673	0.00478438	0.00374539	0.0037172	0.00376402	0.00445361	0.00390214	0.00491975	0.00439764	0.0038729	0.00370906	0.00373604	0.00382978	0.00372179	0.00374049	0.00369315	0.00435402	0.00372742	0.0039236	0.00371173	0.00405721	0.00437046	0.00376825	0.00376199	0.00373463	0.00374564	0.0039272	0.00388819	0.00372727	0.00406565	0.0038374	0.0043271	0.00386403	0.00414512	0.00376389	0.00386031	0.00407536	0.00371047	0.00377086	0.00368835	0.00380648	0.00414893	0.0037018	0.00431768	0.00382782	0.00387003
FORETINIB	0.0036789	0.00363364	0.0037511	0.00583883	0.0037971	0.00448059	0.00362041	0.00363093	0.00354761	0.0043091	0.00379349	0.00499242	0.00353428	0.00418305	0.00418571	0.00381151	0.00507622	0.00401088	0.0053284	0.00372819	0.00358564	0.00354106	0.00407431	0.00367367	0.00424669	0.00411458	0.00364329	0.00504909	0.00524378	0.00349362	0.00509167	0.00434496	0.00370525	0.00424405	0.00384392	0.00375179	0.00365851	0.00433303	0.00361676	0.00374966	0.00400333	0.00443984	0.00347524	0.00360013	0.00413373	0.00346989	0.00363968	0.00357482	0.00463684
FULVESTRANT	0.00455354	0.00392281	0.00541509	0.0035709	0.00372096	0.00372089	0.0038471	0.00484901	0.00370371	0.00383388	0.0037001	0.00371703	0.00438694	0.00407174	0.00374466	0.00383815	0.0036028	0.00352594	0.00376429	0.00387246	0.00383808	0.00400578	0.00361994	0.00448101	0.00363147	0.00410768	0.00369908	0.00362031	0.00375972	0.00373249	0.00353389	0.00375093	0.00410969	0.00397008	0.00372181	0.00376832	0.00385971	0.00384111	0.00400799	0.00446115	0.00378551	0.00372313	0.00384957	0.00410266	0.00397748	0.00383142	0.0049971	0.00375686	0.00373539
FUMONISINB1	0.00375286	0.0039124	0.00407591	0.00360792	0.00429448	0.00363737	0.00378815	0.00363883	0.00377678	0.00371185	0.00485577	0.00369029	0.00413065	0.00367402	0.0038066	0.0044592	0.00367134	0.00371248	0.00364954	0.00363985	0.00363932	0.00454015	0.00363089	0.00375629	0.00394549	0.00415887	0.00376001	0.00364219	0.00369412	0.00383375	0.00370063	0.00372455	0.00403639	0.00415427	0.00460043	0.00531003	0.00495437	0.00380044	0.00399699	0.00406058	0.00375654	0.00375485	0.00403531	0.00414349	0.003761	0.00426152	0.00407819	0.00451885	0.00369813
GANT61	0.00383701	0.0037966	0.00371682	0.00402707	0.00393518	0.00375708	0.00367699	0.00390572	0.00391554	0.00387333	0.00370094	0.00386656	0.00371393	0.00379617	0.00423756	0.0038657	0.00434055	0.00380385	0.00384658	0.00490179	0.00375971	0.00386419	0.0039695	0.0038607	0.00472494	0.00367749	0.00372828	0.00383108	0.0037263	0.00369103	0.00400173	0.00384121	0.00367893	0.00384601	0.00438769	0.00374078	0.0044557	0.00388446	0.00368271	0.00386652	0.00392388	0.00457649	0.00364761	0.00366043	0.00454302	0.00362153	0.00370093	0.00366886	0.00378397
GDC0879	0.00389671	0.00384717	0.00375812	0.00389895	0.00387635	0.003875	0.00362146	0.00375623	0.00373768	0.00448608	0.0037184	0.00494434	0.00379539	0.00382734	0.00373831	0.00409902	0.00370389	0.00375908	0.00401934	0.00434426	0.00383045	0.00393114	0.00377358	0.00373564	0.00374651	0.00382194	0.00370008	0.00391392	0.00382764	0.00377628	0.00378173	0.0038423	0.00382252	0.00390084	0.00380864	0.00371112	0.00376774	0.00402439	0.00373403	0.0040134	0.0037513	0.00393652	0.00397094	0.00379779	0.00390702	0.00429705	0.00374376	0.00375049	0.00440945
GDC0941	0.00358304	0.00359706	0.00351707	0.00412992	0.00375044	0.00397269	0.00365917	0.00354977	0.00362424	0.00486394	0.00445029	0.00386305	0.00351289	0.00433479	0.00663197	0.00425844	0.00548211	0.00638132	0.00384655	0.00379514	0.00363168	0.00349668	0.0040576	0.00361089	0.00436009	0.00358745	0.00388651	0.00455673	0.00433861	0.00351067	0.0040985	0.00363361	0.00363868	0.00358255	0.00355075	0.00368275	0.00354154	0.00376016	0.00356123	0.00364943	0.00387327	0.00373919	0.00344794	0.00354454	0.00381723	0.00346076	0.00357055	0.00364379	0.0038035
GEFITINIB	0.00362138	0.0035686	0.00354895	0.00827994	0.00392965	0.00389727	0.00362009	0.00352891	0.00357103	0.00395265	0.00381938	0.0039586	0.00346971	0.00413609	0.00410999	0.00377834	0.00437444	0.00414981	0.00527124	0.00373296	0.00352014	0.00348694	0.00411907	0.00353717	0.00469977	0.00385405	0.00361222	0.00422627	0.00415622	0.00350591	0.00692123	0.00375515	0.0035915	0.00369261	0.0035828	0.00362059	0.00354937	0.00382942	0.00359257	0.003637	0.00372159	0.00389028	0.003445	0.00353745	0.00449179	0.00344747	0.0035519	0.0035022	0.00407864
GEMCITABINE	0.00382628	0.00365865	0.00384426	0.00358899	0.00371624	0.00407651	0.00407213	0.00375503	0.00378667	0.00372698	0.00390502	0.0036979	0.00538983	0.00439124	0.00421328	0.00363421	0.00387538	0.00360665	0.00377663	0.0036694	0.00396597	0.0037888	0.00381234	0.00366604	0.00363582	0.00378785	0.00394799	0.00369189	0.00359435	0.00393813	0.00356229	0.00415654	0.00400323	0.0036836	0.00369686	0.00367503	0.00368861	0.00374902	0.00396648	0.00369601	0.00368618	0.00364409	0.0037131	0.00386056	0.00373045	0.00372206	0.00396104	0.00377187	0.00370103
GMX1778	0.00375642	0.00376455	0.0037057	0.00444533	0.0041185	0.00381334	0.00367952	0.00371999	0.00375238	0.00375866	0.0037353	0.00378286	0.00374825	0.00378232	0.0037	0.00384572	0.00372325	0.00378493	0.00448016	0.00375703	0.0037369	0.00373594	0.00375481	0.00391068	0.00418214	0.00378085	0.00370456	0.00373221	0.00376643	0.00421049	0.00471925	0.0039028	0.00370318	0.00373537	0.00375428	0.00379651	0.00378093	0.00372797	0.0037115	0.0040834	0.00439906	0.00377321	0.00370659	0.00429302	0.00377894	0.00374826	0.00400006	0.00375499	0.00403243
GOSSYPOL	0.00402854	0.00444007	0.00511244	0.00357749	0.00376417	0.0039716	0.00377514	0.00443201	0.00377209	0.00435283	0.00379117	0.00370873	0.00502578	0.0036044	0.00351606	0.00414144	0.00356568	0.00356224	0.00356634	0.00399768	0.00380828	0.00388249	0.00360793	0.0048856	0.00359428	0.00374298	0.00363004	0.00361317	0.00366997	0.00427477	0.00352406	0.00383843	0.00361061	0.00359507	0.00366855	0.00362168	0.00367006	0.00355773	0.00365789	0.00367684	0.00371188	0.00359248	0.00413336	0.00363862	0.00407327	0.00401735	0.00366715	0.0040628	0.00369426
GSK1059615	0.00420778	0.00381362	0.00363713	0.00400875	0.00443582	0.00378231	0.00378392	0.00366008	0.00397061	0.00489317	0.00472198	0.00445641	0.00359096	0.00389927	0.00645638	0.00403532	0.00487443	0.0049078	0.00378029	0.00384318	0.00421653	0.00364482	0.003789	0.00426569	0.00420867	0.00364368	0.00379265	0.00415279	0.0042227	0.00384502	0.00419056	0.00376231	0.00369722	0.00364413	0.00362945	0.00374307	0.00363934	0.00368727	0.00361412	0.00367826	0.00387939	0.00367859	0.0035728	0.00361784	0.00406579	0.00358539	0.00364831	0.00366812	0.00375984
GSK3INHIBITORIX	0.00369191	0.00429635	0.00377998	0.00388895	0.00456	0.00378279	0.00378319	0.00407409	0.00375725	0.00384371	0.00377656	0.0038567	0.00429562	0.00375642	0.00446899	0.00385787	0.00380783	0.00381086	0.00375022	0.00378641	0.00377871	0.00379508	0.00372991	0.00476819	0.00384251	0.00384994	0.00373587	0.00463163	0.00385789	0.00446331	0.00417899	0.0037401	0.00364697	0.003677	0.00370208	0.00368859	0.0036911	0.00375366	0.00367478	0.00373742	0.00373664	0.00368065	0.00376642	0.00364375	0.00380072	0.00376627	0.00364691	0.00432893	0.00371853
GSK461364	0.00370459	0.00375313	0.00363874	0.00404313	0.0037488	0.00446877	0.00435102	0.00367473	0.00373065	0.00388457	0.00376679	0.00384606	0.00359381	0.00382128	0.00396363	0.00369208	0.00540026	0.00385222	0.00439108	0.00432274	0.00379141	0.00360053	0.00641528	0.00364159	0.00388414	0.00373347	0.00403902	0.00441717	0.00396268	0.00365235	0.00392608	0.00385951	0.00369961	0.003686	0.00365398	0.00370329	0.00365514	0.00375364	0.00371517	0.00381791	0.00377164	0.00409587	0.00373016	0.00369992	0.00402371	0.00373319	0.00370469	0.00368491	0.00403026
GW405833	0.00382893	0.00461836	0.00377808	0.00365736	0.0037824	0.00387999	0.00368564	0.00390089	0.00453887	0.00380301	0.00367128	0.00377831	0.00421994	0.00365249	0.0036404	0.00392407	0.00370972	0.00358833	0.00379816	0.00510652	0.00386955	0.00382539	0.00373289	0.0042828	0.00377647	0.00373481	0.00372213	0.00419057	0.00392764	0.00394241	0.00360292	0.00425694	0.00366931	0.00389443	0.00376914	0.00378252	0.0039086	0.00371999	0.00377837	0.00413904	0.00394324	0.00398428	0.00435268	0.00372394	0.00461218	0.00401827	0.00376633	0.00410858	0.00389124
GW843682X	0.00374551	0.00371783	0.0037214	0.00381724	0.00381036	0.00455776	0.00412218	0.00380271	0.00373154	0.00370797	0.00378876	0.00378235	0.00363722	0.0038017	0.00376346	0.0038386	0.00458963	0.00375719	0.00412958	0.00382968	0.00375624	0.00368792	0.0051135	0.00375507	0.0039053	0.00375655	0.0039006	0.00387518	0.0038923	0.0037891	0.00398963	0.00385548	0.00371918	0.00376279	0.00376282	0.00437632	0.00385343	0.00377125	0.00373793	0.00378563	0.00376057	0.00379141	0.00379246	0.00375603	0.00378947	0.00380658	0.00374385	0.00367571	0.0043412
HLI373	0.00362128	0.00376663	0.00370763	0.00368199	0.00440921	0.00377908	0.00546944	0.00370074	0.00378049	0.0044587	0.0039399	0.00377836	0.00383334	0.00384064	0.00513527	0.0038051	0.00394855	0.00386263	0.00384665	0.00434717	0.00375736	0.00365801	0.00378364	0.00425452	0.00496175	0.00425508	0.00548626	0.00460194	0.00397649	0.003815	0.0038896	0.00376917	0.00367983	0.00380381	0.00378579	0.00392547	0.00378751	0.00386816	0.00370292	0.00383566	0.00377735	0.0039037	0.00367636	0.0036977	0.00378148	0.00368011	0.00370542	0.00428528	0.00371979
HYPERFORIN	0.00489434	0.00409994	0.00388517	0.00355069	0.00380962	0.00366816	0.00373322	0.00442119	0.00377699	0.00367541	0.00411899	0.00364712	0.00446997	0.00361109	0.00352651	0.00392331	0.00355956	0.00359594	0.00355483	0.00405796	0.00385337	0.00581393	0.00361259	0.00476992	0.00361988	0.00373589	0.0036555	0.00361727	0.00366804	0.00390702	0.00353616	0.00378541	0.00359601	0.00358857	0.00365342	0.00361222	0.00369921	0.00361168	0.00362265	0.00363333	0.00372387	0.00362146	0.00393211	0.00360974	0.00375786	0.00385933	0.00362977	0.00535183	0.00435001
IBRUTINIB	0.00419809	0.00360273	0.00359766	0.00709936	0.00408697	0.00403937	0.00361619	0.00417081	0.00361967	0.00398068	0.00378499	0.00400993	0.00360394	0.00395966	0.00398302	0.00372695	0.00417386	0.00438655	0.00411099	0.00375195	0.00360788	0.00387676	0.00384425	0.00362251	0.00398798	0.00370915	0.00369967	0.00406289	0.00432346	0.0035573	0.00551212	0.00368508	0.00368734	0.00369522	0.00373131	0.00364616	0.00374248	0.00385688	0.0036846	0.00366884	0.00365218	0.0038556	0.00355151	0.00362691	0.00388196	0.00356051	0.00363865	0.00356826	0.00499658
IFOSFAMIDE	0.00426258	0.00367487	0.00393229	0.0036306	0.00373966	0.00366069	0.00392932	0.00376901	0.0038197	0.00374046	0.00407249	0.00375559	0.00480584	0.00385567	0.00371228	0.00446779	0.00365884	0.00360634	0.0036714	0.00383531	0.00382236	0.00406082	0.00365255	0.00372331	0.00377822	0.00435302	0.00378769	0.00361136	0.00363566	0.00376316	0.00373055	0.0036642	0.00384562	0.00375721	0.00382423	0.00385522	0.00455555	0.00371428	0.00380118	0.00373441	0.00365898	0.00366151	0.0041507	0.00387324	0.0039132	0.00392165	0.00380498	0.00372208	0.00433549
IMATINIB	0.00382428	0.00368928	0.00362703	0.00384201	0.00373475	0.00488738	0.00367454	0.00376827	0.00363911	0.00416893	0.00374123	0.00554737	0.00398847	0.00417946	0.00381045	0.00374503	0.00386275	0.003938	0.00447588	0.00377044	0.00378211	0.00378721	0.00381743	0.00377268	0.00384452	0.00365179	0.00426636	0.00380807	0.00390445	0.00359153	0.00382541	0.00383922	0.00416359	0.00389536	0.00374685	0.003689	0.00370245	0.00446026	0.00382664	0.00382199	0.00370248	0.00424659	0.00357261	0.00373429	0.00375551	0.00355458	0.00375499	0.00363345	0.00404235
IMPORTAZOLE	0.00377173	0.00377966	0.00385853	0.00391495	0.00439969	0.00378482	0.00376363	0.00467818	0.00371344	0.00381339	0.00376551	0.00371104	0.00388353	0.00437275	0.00378335	0.00372198	0.00371567	0.00458623	0.00388705	0.00420261	0.00368475	0.00436061	0.00440654	0.00416225	0.00520169	0.00368624	0.00413427	0.00380899	0.00388358	0.003786	0.00404228	0.00376948	0.0035652	0.00357098	0.00364919	0.00362884	0.00367066	0.00364374	0.00361252	0.00363294	0.00365494	0.00368051	0.00392656	0.00357976	0.00375529	0.00387898	0.00360123	0.00378389	0.00377894
ISOLIQUIRITIGENIN	0.00425539	0.0038151	0.00454843	0.00423637	0.00380529	0.00366042	0.00453514	0.00412614	0.00383576	0.00382926	0.00376787	0.00360335	0.00390984	0.00368211	0.00353019	0.00410181	0.00361289	0.00351467	0.00359934	0.00385051	0.00433353	0.00397498	0.00364071	0.00459833	0.00362427	0.00380126	0.00366545	0.00357791	0.00361678	0.00467328	0.00365793	0.00371544	0.00365046	0.00365071	0.0036927	0.00368222	0.00372603	0.00370966	0.00366358	0.00362883	0.00364348	0.00360482	0.0047954	0.00367097	0.00374722	0.00481213	0.00364674	0.00387625	0.00424317
ISONICOTINOHYDROXAMICACID	0.00541131	0.00376484	0.00395041	0.00364809	0.00379587	0.00372089	0.00379423	0.00378732	0.00387297	0.00373231	0.00378259	0.00437719	0.00483064	0.00403966	0.00362939	0.00414858	0.00362908	0.00356778	0.00381025	0.00440114	0.00426197	0.00391306	0.00371668	0.00374627	0.0036879	0.00393225	0.00396477	0.00365372	0.00363346	0.00369651	0.00363084	0.00385667	0.00447311	0.00435814	0.00409423	0.0038243	0.0038474	0.00383829	0.00396386	0.00386789	0.00376521	0.00374685	0.00369528	0.00448186	0.0061707	0.0037173	0.00451389	0.00371831	0.00469179
ISOX	0.00383228	0.00432114	0.00381913	0.0035587	0.00401467	0.0037347	0.00380799	0.0041266	0.00629653	0.00367767	0.0036727	0.00378942	0.00389954	0.00448679	0.00367483	0.00382147	0.0042483	0.00365584	0.00375528	0.00383362	0.00646818	0.00387092	0.00399413	0.00383729	0.00370681	0.00383825	0.00376245	0.0037335	0.00372296	0.00394586	0.0036366	0.00382637	0.00390571	0.0037382	0.0037554	0.00375688	0.00376609	0.00412183	0.00477204	0.00379295	0.00433539	0.00372622	0.00386045	0.0039061	0.00380693	0.00383667	0.00397864	0.00379194	0.00381085
ITRACONAZOLE	0.00369843	0.00453111	0.00396549	0.00416105	0.00439133	0.00391574	0.00384962	0.00377549	0.00373924	0.0043378	0.00395829	0.00377642	0.00372798	0.00371606	0.00374854	0.00384851	0.00374579	0.00365446	0.00395701	0.00383473	0.0037195	0.00384892	0.00406194	0.00415241	0.00386999	0.00391956	0.00372127	0.00385431	0.0041257	0.00380997	0.0038611	0.00408795	0.00385891	0.00426965	0.00396455	0.0040288	0.00498375	0.0039606	0.00395858	0.0041058	0.00393159	0.00431441	0.00459073	0.00393597	0.00387452	0.00457767	0.00388705	0.00393216	0.00381205
KI8751	0.00445955	0.00368888	0.00364186	0.00457978	0.00391459	0.00422732	0.00362729	0.00376618	0.00367791	0.00396295	0.00367306	0.00610715	0.00373486	0.00445339	0.00371726	0.00375354	0.00386498	0.00380836	0.00436235	0.00366557	0.00369905	0.0037511	0.00380652	0.00383188	0.0039436	0.00367211	0.00371212	0.00391318	0.00396934	0.00366729	0.00464775	0.00420826	0.00366306	0.00380491	0.00372159	0.00362423	0.00366177	0.00393148	0.003616	0.00363381	0.0037927	0.00400463	0.00396366	0.00365783	0.00379055	0.00396404	0.00364516	0.00363605	0.00463959
KO143	0.00378024	0.00429712	0.00395498	0.0036962	0.00390061	0.00371534	0.00370619	0.00379475	0.00476382	0.00377798	0.00389499	0.00367253	0.00388028	0.00364273	0.00371272	0.00449276	0.00370102	0.00364378	0.003675	0.00417696	0.00372458	0.00382373	0.00369368	0.00418834	0.00365503	0.00403224	0.00367705	0.00395642	0.00435989	0.00462426	0.00371678	0.00379854	0.00428192	0.00431232	0.00457666	0.00510431	0.00419193	0.00378389	0.00493341	0.00474569	0.00391876	0.00377121	0.004743	0.00462544	0.00405258	0.00469068	0.00463617	0.00445718	0.00366957
KU0060648	0.00366537	0.00379265	0.00357047	0.00398324	0.00373325	0.00376849	0.00442655	0.0037355	0.00383313	0.00401936	0.00375404	0.00385254	0.00362541	0.00392817	0.00585085	0.00376373	0.00481521	0.00417789	0.0038239	0.00440934	0.00392507	0.00356064	0.00605311	0.00368243	0.00394015	0.00373063	0.00376148	0.00503387	0.00410194	0.00363145	0.00384386	0.00374947	0.0036009	0.00368287	0.00368119	0.00364495	0.00361133	0.00412278	0.00360899	0.00374692	0.00414603	0.00413707	0.00381783	0.00358029	0.00438107	0.00400472	0.00357339	0.00387244	0.00378791
KU0063794	0.00362005	0.00357994	0.00356077	0.00383278	0.00370952	0.00427329	0.00369376	0.0035415	0.00363056	0.00476126	0.00395673	0.00378908	0.00352105	0.00442545	0.00622686	0.00390484	0.00421155	0.0111056	0.00382737	0.00374285	0.00364631	0.00352097	0.00389396	0.00363251	0.00455081	0.00371379	0.00391439	0.00447703	0.0049148	0.00351766	0.00388208	0.00367103	0.00366971	0.00357879	0.00353979	0.00365794	0.0035342	0.00372013	0.00361349	0.00363788	0.00385088	0.00364592	0.00345705	0.00359749	0.00374082	0.0034684	0.00360755	0.00372282	0.00384843
KU55933	0.00368683	0.00370248	0.00359311	0.00412019	0.00373345	0.00380989	0.00442541	0.00366988	0.00369744	0.00419108	0.00383467	0.00425368	0.00361496	0.00381469	0.00662862	0.00391533	0.00541899	0.00451633	0.0038416	0.00382121	0.00414886	0.00356154	0.00394169	0.00380474	0.00383963	0.00372103	0.00373058	0.00439469	0.00412735	0.00367801	0.00391945	0.00375946	0.00369234	0.00375485	0.00364866	0.00378879	0.00364206	0.00373837	0.00364725	0.00376697	0.00447495	0.00382837	0.00363798	0.00363838	0.00417762	0.00366553	0.00366857	0.00363299	0.00377595
KU60019	0.00370289	0.00396879	0.00369051	0.00442308	0.00380679	0.00391966	0.00432132	0.00378614	0.00371884	0.00378571	0.00365442	0.00394177	0.00377006	0.00392872	0.00505068	0.00376807	0.00447371	0.00379146	0.00395403	0.00389519	0.00395299	0.00370511	0.00384872	0.00381704	0.0038008	0.00387237	0.00368537	0.00432063	0.00389001	0.00375715	0.00378874	0.00456537	0.00372882	0.00377202	0.00374162	0.00369079	0.00372428	0.00387156	0.00384586	0.00404301	0.00458179	0.00394339	0.00417222	0.00380855	0.00381456	0.00418198	0.00373285	0.00373493	0.00373867
LAPATINIB	0.00368218	0.00360002	0.00360405	0.00762781	0.00449863	0.00434775	0.00365414	0.00359825	0.00361008	0.00380486	0.00369916	0.00431325	0.00354273	0.00479182	0.00385659	0.00363604	0.0039132	0.00386892	0.00529121	0.00371867	0.00366878	0.00356311	0.0039088	0.00357737	0.00441472	0.00373859	0.00365783	0.00405189	0.00402873	0.00357371	0.00634712	0.00379357	0.00411405	0.00372007	0.00364794	0.00360742	0.00362677	0.00420578	0.00433206	0.00371786	0.00366697	0.00387083	0.00355235	0.00379834	0.00382675	0.00355264	0.00375747	0.00354016	0.00407805
LE135	0.00389436	0.00465002	0.00465024	0.00356048	0.00389584	0.00405273	0.00374164	0.00498631	0.0037747	0.00378442	0.003702	0.00360567	0.00412331	0.00366987	0.003579	0.00398918	0.00357645	0.00358759	0.00370704	0.00390822	0.0037971	0.00393166	0.00361256	0.00475994	0.00366899	0.00454834	0.00365983	0.00370107	0.00367605	0.00399214	0.00358051	0.00400394	0.00363167	0.00360972	0.00369365	0.00363846	0.00367328	0.00356818	0.00364838	0.00368804	0.00375122	0.00357774	0.00438827	0.00366237	0.00363616	0.00410558	0.00367963	0.00427528	0.00365171
LINIFANIB	0.00377204	0.00368108	0.00366362	0.003768	0.00424992	0.00391019	0.00509465	0.00374581	0.00376833	0.00450715	0.00407086	0.00525162	0.00367055	0.00399948	0.00374568	0.00381225	0.00401309	0.00383321	0.00425276	0.00373362	0.00376053	0.00361908	0.00396304	0.00379514	0.00394332	0.00368405	0.00680344	0.00387652	0.00395853	0.00370392	0.00398993	0.00395103	0.00364358	0.00365952	0.00361999	0.00366581	0.00369274	0.00370633	0.0036424	0.00365641	0.00394203	0.00375971	0.00360117	0.00362582	0.00377834	0.0036135	0.00364711	0.00389824	0.00393254
LINSITINIB	0.0036295	0.00371517	0.00360792	0.00379314	0.00376509	0.00456687	0.00369287	0.00364112	0.00368752	0.00401718	0.00378187	0.00388438	0.00359682	0.0040581	0.00443158	0.00402185	0.0042157	0.00482803	0.00424597	0.00372799	0.00369206	0.00364612	0.00381211	0.00418768	0.00386008	0.00369556	0.00473405	0.00608074	0.00735225	0.00357837	0.00381351	0.00389857	0.00380444	0.00384071	0.00371921	0.00389747	0.00369181	0.00390541	0.00381986	0.00383571	0.00382443	0.00379159	0.00364921	0.00372909	0.00421217	0.00360977	0.00375157	0.00370769	0.00429078
LOVASTATIN	0.00391725	0.00388236	0.00397164	0.00370443	0.00377672	0.00379136	0.0037629	0.00376216	0.00375291	0.00375455	0.00551515	0.00429881	0.00375209	0.00437548	0.00365118	0.00378623	0.00365269	0.0036566	0.00384684	0.00370553	0.00381923	0.00470195	0.00361666	0.00374537	0.00370331	0.0038822	0.00375467	0.00363875	0.00367162	0.00376499	0.0036656	0.00379899	0.00444001	0.00393734	0.00385703	0.00382156	0.00383733	0.00437212	0.00484498	0.00431257	0.00376175	0.0038261	0.00375781	0.00401616	0.00378996	0.00378011	0.00418756	0.00515439	0.00375861
LY2183240	0.00410993	0.00372524	0.004259	0.00361088	0.00381365	0.00445571	0.00406651	0.00380957	0.00377904	0.00502351	0.00376929	0.00458639	0.00373911	0.00399844	0.00364283	0.00370167	0.00397382	0.00367316	0.00402261	0.00368584	0.00394376	0.00375276	0.00466751	0.00372673	0.00366781	0.00389955	0.00403504	0.00370976	0.00369796	0.00393217	0.00362931	0.00414513	0.00421508	0.00371847	0.00369787	0.00368335	0.00372613	0.0038227	0.00447746	0.00378287	0.00372522	0.00367755	0.00378592	0.00443406	0.00375916	0.00379248	0.00414543	0.00373613	0.0037477
MANUMYCINA	0.00379047	0.00415471	0.0037986	0.00349493	0.00437818	0.0039245	0.00379768	0.00399442	0.00402117	0.00370309	0.00446356	0.00372235	0.00403515	0.00448145	0.00367862	0.00386638	0.00363211	0.00363614	0.00377708	0.0037221	0.00483262	0.00408586	0.00366897	0.00383249	0.00363781	0.00380282	0.00378297	0.00362264	0.00366574	0.00391723	0.00353625	0.00438852	0.0044955	0.00369921	0.00378577	0.00372354	0.00376492	0.00388715	0.00437851	0.00376881	0.00379043	0.00368981	0.00461499	0.00391069	0.00361232	0.00469814	0.00386544	0.00408967	0.00368982
MASITINIB	0.00372579	0.00367769	0.00357414	0.0041093	0.00374193	0.00428229	0.00366603	0.0037572	0.00363678	0.00413739	0.00409829	0.00484792	0.003623	0.00406937	0.00417328	0.00394737	0.00439044	0.00413346	0.00400297	0.0041756	0.0037179	0.00363557	0.00390963	0.00372765	0.00398784	0.00363232	0.00389824	0.0040118	0.00405225	0.00355898	0.00410161	0.00374537	0.00367731	0.00373053	0.0036388	0.00373532	0.00372763	0.00384419	0.00362562	0.00372655	0.00380838	0.00406635	0.00349409	0.00358399	0.0039496	0.00348946	0.00359677	0.00359772	0.00393602
MERCK60	0.00381826	0.00396477	0.0040068	0.00359804	0.003829	0.00372711	0.00387294	0.00466542	0.00549456	0.00373197	0.00364356	0.00380572	0.00377106	0.00373655	0.00375499	0.00446803	0.00466025	0.0038562	0.00372016	0.00391877	0.00565612	0.00373523	0.00466602	0.00416861	0.00369079	0.0037333	0.00384876	0.00381647	0.00371316	0.00376311	0.00361305	0.00441911	0.00366952	0.00387709	0.0037413	0.00388118	0.00383563	0.00375068	0.00373785	0.00380952	0.00494595	0.00375386	0.00360919	0.00369255	0.00454576	0.00362031	0.00368625	0.00378001	0.00371054
METHOTREXATE	0.00426014	0.00374352	0.00438323	0.00365201	0.00375679	0.00380697	0.00389982	0.00374287	0.00381585	0.0036749	0.00377795	0.00375946	0.00431871	0.00379468	0.0036415	0.00371202	0.00367232	0.00384113	0.00373523	0.0036806	0.00375933	0.00382923	0.00466245	0.00372515	0.00383741	0.00432617	0.00472486	0.00368999	0.00403584	0.00397833	0.00383651	0.00384698	0.00380345	0.00385893	0.00400936	0.00429376	0.00415814	0.00372884	0.00440233	0.00388943	0.00401331	0.00369917	0.00396501	0.00394706	0.00383446	0.00376154	0.0039206	0.00382784	0.0046311
MG132	0.00371834	0.00389558	0.00384059	0.00348096	0.00375395	0.00360967	0.00420527	0.00384953	0.00491517	0.00370536	0.00392967	0.00356724	0.00408119	0.00359862	0.00352126	0.00379869	0.00373064	0.00355379	0.00351164	0.00415344	0.00403042	0.00383137	0.00372528	0.00387836	0.00398041	0.00377438	0.00380854	0.00354932	0.00354072	0.00924999	0.00356674	0.00375136	0.00365647	0.0036281	0.00370625	0.0037181	0.00383624	0.00362181	0.00378665	0.00366475	0.00372994	0.00359234	0.00504717	0.00382365	0.00360266	0.00526428	0.00397719	0.00417703	0.00361129
MGCD265	0.00374474	0.00370509	0.00371176	0.00413511	0.00380057	0.00446991	0.00363516	0.0036922	0.00357724	0.00403867	0.00447345	0.00494012	0.00362215	0.00445719	0.00399585	0.0046219	0.00404363	0.00400193	0.00426009	0.00368341	0.00364728	0.00369097	0.0037779	0.00374761	0.00390877	0.00375101	0.00380903	0.00401653	0.00434114	0.00354543	0.00411332	0.00380469	0.00374209	0.00382756	0.00374295	0.00418229	0.00425404	0.00382784	0.00367515	0.00374691	0.00373923	0.00387834	0.00355548	0.00369662	0.00384109	0.00355506	0.00369695	0.00357556	0.00470486
MK1775	0.00367523	0.00369608	0.00368729	0.00404529	0.00382536	0.00413416	0.00441368	0.00388388	0.00371534	0.00392399	0.00408091	0.0038326	0.00359891	0.00456882	0.00389371	0.00376986	0.0051215	0.00395606	0.00452052	0.00373014	0.00370642	0.00371166	0.00534889	0.00366402	0.00427045	0.00369772	0.00417694	0.00430199	0.00478775	0.00374033	0.00436899	0.00374725	0.00371392	0.00374733	0.00380489	0.00392018	0.00482712	0.00372222	0.00372698	0.00374409	0.0036855	0.00377931	0.003752	0.00371306	0.00383697	0.00371245	0.00372867	0.0037293	0.00384671
MK2206	0.00361742	0.00379458	0.00359772	0.00405414	0.00376452	0.0043801	0.00365799	0.00361161	0.003698	0.00456386	0.0038274	0.00391902	0.00353971	0.00446547	0.00530781	0.00377217	0.00416248	0.00534373	0.00386898	0.00399964	0.00366208	0.00356757	0.00426411	0.00361146	0.00389624	0.00367216	0.00380777	0.00431171	0.00406413	0.00358551	0.00390296	0.00378904	0.0039365	0.00374052	0.0036809	0.00376842	0.00360161	0.00381666	0.00370362	0.00464318	0.00381417	0.00395694	0.00355301	0.00367982	0.00390537	0.00354185	0.00368928	0.00368438	0.00384144
MLN2238	0.00374479	0.00425761	0.00457873	0.00349772	0.00385387	0.00362207	0.0042924	0.00380591	0.00506586	0.00368044	0.00383601	0.00359218	0.00393287	0.00359592	0.00354805	0.00420721	0.00421774	0.00367794	0.00358225	0.00378672	0.00418789	0.00381372	0.00374129	0.00374218	0.00382278	0.00436741	0.00420262	0.00354661	0.00355734	0.00934929	0.00365748	0.00376766	0.00375387	0.00367891	0.00376338	0.00377661	0.00426642	0.00364077	0.00402048	0.0037214	0.00378467	0.00363113	0.00405305	0.00389634	0.00365695	0.00408893	0.00426305	0.00440256	0.00365932
MST312	0.00379291	0.00397077	0.0039234	0.00345457	0.0037584	0.00373996	0.00410108	0.00507394	0.00387062	0.0037381	0.00371461	0.0037661	0.00381556	0.00362829	0.00357018	0.00460373	0.00374322	0.00367124	0.00359418	0.00386119	0.00405627	0.00378921	0.00377376	0.00487258	0.00364982	0.00373574	0.00409907	0.00355483	0.00357796	0.00425292	0.00351858	0.00430416	0.00355839	0.0035636	0.00360193	0.00360921	0.00365322	0.00361036	0.00360724	0.00364055	0.00435392	0.00363435	0.0037762	0.00360958	0.0037294	0.00377508	0.00364878	0.0040983	0.00365715
MYRICETIN	0.00503186	0.00366936	0.00399836	0.00365909	0.00378705	0.00374513	0.00576691	0.00382509	0.00379549	0.00373825	0.00408149	0.0037031	0.00492284	0.00430423	0.00371854	0.00377025	0.0036674	0.0035936	0.00377235	0.00367743	0.00404221	0.00387851	0.00370027	0.00408683	0.00363197	0.00405105	0.00383698	0.00362533	0.00361455	0.00379884	0.00360989	0.00380893	0.00376833	0.00367468	0.0037187	0.00364021	0.00373861	0.00380489	0.00389967	0.00366096	0.00366128	0.00360983	0.00382639	0.00406307	0.00424614	0.00397931	0.00403074	0.00383554	0.00458261
MYRIOCIN	0.00394537	0.00427971	0.0058083	0.00363179	0.00374346	0.00364837	0.00370351	0.0038847	0.00372409	0.00380004	0.00449802	0.00370739	0.00378971	0.00366139	0.00377691	0.00426061	0.00389216	0.0037136	0.00362083	0.00364224	0.003724	0.00547059	0.00363578	0.00416576	0.00376575	0.00402388	0.00369807	0.00365566	0.0037055	0.00376659	0.00367729	0.00374048	0.00429675	0.00398264	0.00398571	0.00481965	0.00484456	0.00369954	0.00432384	0.00390129	0.00375291	0.00369987	0.00378037	0.00404527	0.00421524	0.00382421	0.00399725	0.00460749	0.00369101
NARCICLASINE	0.00395345	0.0038326	0.0038083	0.00348947	0.00389511	0.00380853	0.00634901	0.00380557	0.00385882	0.0037541	0.00391184	0.00360397	0.00386048	0.00366005	0.00361542	0.00367213	0.00441013	0.00365708	0.00376677	0.004014	0.00382843	0.00375447	0.00447605	0.00376893	0.00376553	0.00387816	0.00497149	0.00369222	0.00369027	0.00412297	0.00362738	0.00424825	0.00381112	0.00366546	0.00370359	0.00385452	0.00407378	0.00362394	0.00391654	0.00374462	0.00386727	0.00384561	0.0042732	0.00407629	0.00369796	0.00454976	0.00446201	0.0046151	0.00362307
NAVITOCLAX	0.00398586	0.00850473	0.00391779	0.00361307	0.00382555	0.0038587	0.00375236	0.0042414	0.00380314	0.00368554	0.00377883	0.00376334	0.00378778	0.00373864	0.00403225	0.00434545	0.00376456	0.00372324	0.00381921	0.00380563	0.00442169	0.0039831	0.00378044	0.00407582	0.00371368	0.00415429	0.00366569	0.00380517	0.00370996	0.00380992	0.00360352	0.00507661	0.00461584	0.00467189	0.00433993	0.00391974	0.00396804	0.00412968	0.00385884	0.00401469	0.00395194	0.00408529	0.00383897	0.00435288	0.0036978	0.00387457	0.00393269	0.00392327	0.00369747
NECROSTATIN1	0.00470262	0.00421179	0.0038031	0.003936	0.00376017	0.00405183	0.00368513	0.00379433	0.00519622	0.00417932	0.00372421	0.00377968	0.00388909	0.00404287	0.00393809	0.00382969	0.00380698	0.00368353	0.0036902	0.00425723	0.00395056	0.00386676	0.00374791	0.00382332	0.00368276	0.00380531	0.00368807	0.00376096	0.00369878	0.0044024	0.00368186	0.00417329	0.00384786	0.00383557	0.00377479	0.00376908	0.00376405	0.00394061	0.00404889	0.00416765	0.00462881	0.00380139	0.00380177	0.00387492	0.00396655	0.00375643	0.00385177	0.00374326	0.00379006
NERATINIB	0.00363016	0.00367372	0.00360045	0.00846013	0.00453043	0.00389425	0.00365658	0.00364947	0.00365188	0.00381703	0.00370011	0.00384154	0.00363689	0.00394179	0.00388853	0.00380348	0.00396176	0.00383423	0.00433275	0.00427465	0.00359826	0.00357668	0.00398044	0.00393354	0.00412412	0.00375238	0.0036194	0.00444518	0.00405981	0.00394109	0.00684977	0.0036832	0.00360141	0.00364518	0.00358515	0.00360754	0.00362982	0.00379021	0.00362002	0.00363356	0.00367602	0.00396754	0.00371751	0.00358365	0.00408065	0.00373858	0.00359323	0.00364065	0.00394573
NICLOSAMIDE	0.00386414	0.00430403	0.00396962	0.00354162	0.00379583	0.00370162	0.00370361	0.00547438	0.0038955	0.0036866	0.00399348	0.00374885	0.00420186	0.00358953	0.00352488	0.00482312	0.00364516	0.00355756	0.00353833	0.00534046	0.00395178	0.00395531	0.00370246	0.00524143	0.00364543	0.00376874	0.00366931	0.00369123	0.0036203	0.00431932	0.00352539	0.00393573	0.00353691	0.00356276	0.00361482	0.00358843	0.00364031	0.00355871	0.0035863	0.00363803	0.00407467	0.00362473	0.00392595	0.00358176	0.00371366	0.00392796	0.0036203	0.00438744	0.00368375
NILOTINIB	0.00380751	0.00379619	0.00365542	0.00392387	0.00382173	0.00455764	0.00363425	0.00432988	0.00363047	0.00415018	0.0043742	0.00411977	0.00384521	0.00389025	0.00390533	0.00418224	0.00412562	0.00398424	0.00386731	0.00383178	0.00370042	0.00438508	0.0038229	0.00410752	0.00387465	0.0036674	0.0039428	0.00389044	0.00409076	0.00364212	0.00388754	0.00372923	0.00363412	0.00362719	0.00361594	0.00366124	0.00368822	0.00376064	0.00360321	0.0036646	0.00376101	0.00379528	0.00361137	0.00358283	0.00405301	0.00360684	0.00359211	0.00375124	0.00434127
NINTEDANIB	0.00373313	0.00382219	0.00374477	0.00407289	0.00445145	0.0038677	0.00381112	0.00485358	0.00363322	0.0042219	0.00379809	0.00450787	0.0036285	0.00393246	0.00469089	0.00419385	0.00473887	0.00387414	0.0039249	0.00375506	0.0037907	0.00371535	0.00399385	0.00495676	0.00393634	0.00387106	0.00368765	0.00563883	0.00416483	0.00383841	0.00398193	0.00378675	0.00364328	0.00370724	0.00368256	0.00378064	0.00369635	0.00373537	0.00361904	0.00372955	0.00379356	0.00379929	0.00358673	0.0035858	0.00388269	0.0036014	0.00359485	0.00362234	0.00392051
NSC23766	0.00365883	0.00367805	0.0037164	0.00395391	0.00399916	0.00383147	0.00385606	0.00363324	0.00375728	0.00395907	0.00384986	0.00383393	0.00357541	0.00528748	0.00405774	0.00384632	0.00394442	0.00513624	0.00441152	0.00459525	0.00368197	0.00361401	0.00457617	0.00363427	0.0060088	0.00373529	0.00449101	0.00401013	0.00460524	0.0036203	0.00413758	0.00372176	0.00368973	0.0038586	0.00384091	0.00444268	0.00379073	0.00396131	0.00367558	0.00384279	0.00385003	0.00454348	0.00359886	0.00365368	0.00379912	0.0035947	0.0036751	0.00369841	0.00386663
NSC632839	0.00406409	0.00382979	0.00390774	0.00356879	0.00382563	0.00371927	0.00466409	0.00396618	0.00409083	0.00420691	0.00380638	0.00360399	0.00392251	0.0036505	0.00358797	0.00372575	0.00373966	0.00361977	0.00356962	0.0040915	0.00453451	0.00395675	0.00391656	0.00459931	0.00370142	0.00379022	0.00386071	0.00356779	0.00359813	0.00573477	0.00360015	0.00367609	0.00363008	0.00356913	0.00362816	0.00361672	0.00373025	0.00361086	0.00364217	0.00359793	0.00362351	0.00360102	0.00498586	0.00367459	0.00363329	0.00521546	0.0036601	0.00401945	0.00365566
NUTLIN3	0.00373969	0.00416031	0.00381478	0.00357199	0.00374937	0.0042313	0.00380981	0.00387487	0.00394877	0.00394707	0.00373363	0.00360061	0.00403346	0.0037055	0.00360499	0.00384836	0.00377953	0.00368017	0.00377039	0.00455911	0.00383302	0.00382485	0.00375353	0.0039324	0.0043095	0.0039223	0.00380205	0.00370244	0.0037397	0.0045698	0.00362325	0.00475038	0.00367323	0.00385006	0.00377379	0.00385006	0.00385836	0.00378976	0.0037393	0.0038168	0.00470752	0.0038076	0.00432084	0.00384234	0.00373732	0.0045269	0.00379238	0.0043991	0.0036465
NVPBEZ235	0.00394606	0.00361522	0.00360679	0.00389095	0.00432679	0.00382895	0.00377094	0.00360017	0.00393656	0.00507453	0.0039338	0.00386046	0.00377309	0.00418171	0.00491051	0.00382517	0.00408446	0.00722943	0.00376269	0.00385101	0.00365552	0.00360151	0.00387751	0.00369436	0.00398322	0.00365679	0.00396815	0.0040087	0.00408037	0.0036592	0.00440321	0.00364383	0.00363893	0.00362782	0.00367858	0.00364638	0.00361636	0.00401713	0.00360361	0.00365679	0.00379279	0.00379291	0.00358403	0.00359687	0.00374142	0.0035915	0.00362644	0.00374177	0.00387674
NVPTAE684	0.00358903	0.00373174	0.00355028	0.00506004	0.00381297	0.00437208	0.00373409	0.00363075	0.00360665	0.00465675	0.00409609	0.00396682	0.00351014	0.00480615	0.0043871	0.00387008	0.00526361	0.00407288	0.00472399	0.0039714	0.00361432	0.00353583	0.00520301	0.00362925	0.00485948	0.00364963	0.00381401	0.00614274	0.00622343	0.00354026	0.00455492	0.00383299	0.00359493	0.00370005	0.00362623	0.00365044	0.0036324	0.0037891	0.00358532	0.00371176	0.00376713	0.00389185	0.00353111	0.0035445	0.00423099	0.00350476	0.00357535	0.00363859	0.00390627
OBATOCLAX	0.00403014	0.0040229	0.003702	0.00362046	0.00385266	0.00379613	0.00410595	0.00386557	0.00378957	0.00381031	0.00374892	0.00436011	0.00390222	0.00371243	0.00410429	0.00374655	0.00405979	0.00378015	0.00374099	0.00443791	0.00380785	0.00376805	0.00393648	0.00419209	0.00439749	0.00367882	0.00394542	0.00439656	0.00379805	0.00387366	0.00373081	0.00380013	0.00367856	0.00369764	0.00372563	0.00366865	0.00364098	0.00384323	0.00362055	0.00387732	0.00380447	0.00472561	0.00382074	0.00360709	0.00380042	0.00376346	0.00366408	0.00493273	0.00373099
OLAPARIB	0.00375413	0.00449684	0.00382971	0.003678	0.00378725	0.00455022	0.00375635	0.00432667	0.00386411	0.00382487	0.00373747	0.00377761	0.00374554	0.0039381	0.00403411	0.00392858	0.00441442	0.00381603	0.00428087	0.00413001	0.00375645	0.00374495	0.00392022	0.00384849	0.00378606	0.00385847	0.00371326	0.00406017	0.00389377	0.00399222	0.00377625	0.00417273	0.00381443	0.00396168	0.00377551	0.00427146	0.00383035	0.00373031	0.00402266	0.00395326	0.00468304	0.00373955	0.00376326	0.00387778	0.00381067	0.00378559	0.0040999	0.00377107	0.00374273
OLIGOMYCINA	0.00382513	0.00433555	0.00382395	0.003509	0.00373882	0.00371558	0.0037361	0.00396066	0.00377948	0.00372984	0.00474168	0.00365382	0.00404581	0.00362626	0.00355964	0.00521048	0.00357685	0.00368481	0.0035722	0.00384564	0.0037773	0.00454156	0.00357675	0.00480111	0.00359539	0.00374261	0.00373358	0.00365722	0.00381796	0.00389145	0.00352269	0.00381091	0.00370011	0.00358891	0.00367444	0.00364025	0.003687	0.00358005	0.00370006	0.00366142	0.00376138	0.00357785	0.00393958	0.00369214	0.00363732	0.00389411	0.0037282	0.00556965	0.00370324
OSI027	0.00363881	0.00364284	0.00355092	0.00386784	0.0036967	0.00466988	0.00367038	0.00359847	0.00365034	0.00444377	0.0040185	0.0038735	0.00351558	0.00405388	0.00614888	0.0039498	0.00425117	0.00791977	0.00393039	0.0036833	0.00367015	0.00355342	0.00382438	0.0036607	0.0038557	0.0036615	0.00402027	0.00418477	0.00481105	0.00350508	0.00381781	0.00380751	0.00368666	0.00362306	0.00358013	0.00368592	0.00358304	0.003732	0.00365836	0.00365884	0.00388416	0.00367079	0.00349359	0.00361075	0.00381444	0.00347227	0.0036333	0.00362863	0.00455784
OSI930	0.0037917	0.00390608	0.00369564	0.0036692	0.00399589	0.00389223	0.00366061	0.00392451	0.00374345	0.00375461	0.00372506	0.00422811	0.00381698	0.00374911	0.00386041	0.00451453	0.00471131	0.00437728	0.00400072	0.00379395	0.00386436	0.00369572	0.0038332	0.00462451	0.00370581	0.00369259	0.00373797	0.00374751	0.00375162	0.00368434	0.00370526	0.00474753	0.00392161	0.00383864	0.00431936	0.0038065	0.00373317	0.00418615	0.00370061	0.00387365	0.0051828	0.00395332	0.0036207	0.00375437	0.00431172	0.00360933	0.0037537	0.00370924	0.00386091
OUABAIN	0.00379688	0.00374824	0.00379577	0.00347504	0.00415549	0.00371924	0.00493661	0.00370971	0.00413913	0.00429538	0.00499468	0.00367621	0.00384719	0.00365944	0.00365922	0.00374359	0.00375712	0.00416071	0.00362312	0.00373375	0.00377319	0.00442693	0.00386647	0.00377683	0.00401557	0.00374338	0.0052533	0.00359327	0.00365778	0.00445594	0.00364781	0.00372151	0.00371812	0.0035779	0.00368295	0.00363853	0.00373594	0.00358027	0.00370233	0.00365848	0.00364856	0.00367963	0.00383376	0.00374971	0.00363168	0.00386857	0.00381106	0.00628097	0.00364796
PAC1	0.00377004	0.00394566	0.00386982	0.00356662	0.00376902	0.00376239	0.00377603	0.00437336	0.00399578	0.00375116	0.0036319	0.00372651	0.0038208	0.00429097	0.00364918	0.00397898	0.00374836	0.00369083	0.00363713	0.00449897	0.00435513	0.00378681	0.00372363	0.00424728	0.00427374	0.00372861	0.00369876	0.00364679	0.0036297	0.00460406	0.00361858	0.00386344	0.00361152	0.00361357	0.00361958	0.00359692	0.0035911	0.00365054	0.00362934	0.00371735	0.00387907	0.003668	0.00378343	0.00365582	0.00409175	0.00381328	0.00375249	0.00389093	0.0036962
PACLITAXEL	0.00383975	0.00364863	0.00466421	0.00362507	0.00366462	0.0040817	0.00475998	0.0037036	0.0037507	0.00376861	0.00464067	0.00381747	0.00382132	0.00382206	0.00364287	0.00366889	0.00416397	0.00367717	0.0043942	0.0036465	0.00384098	0.00377606	0.00509649	0.00364108	0.00370851	0.00494921	0.00434744	0.00369288	0.00371104	0.00372601	0.00363304	0.00385732	0.00404026	0.00368495	0.00369608	0.00380769	0.00383777	0.00366533	0.00451977	0.0037762	0.00367994	0.00367747	0.00431372	0.00462993	0.00374205	0.00440065	0.00440303	0.0039146	0.00370179
PARBENDAZOLE	0.00442474	0.00366414	0.00418788	0.00359225	0.00436992	0.00417285	0.00460347	0.00380242	0.0039741	0.00402348	0.00386467	0.00387861	0.0037124	0.00382553	0.00371769	0.00375069	0.00397843	0.00378718	0.0038517	0.00383124	0.00387091	0.00374972	0.00506608	0.00369753	0.00429563	0.00387367	0.00525462	0.00371548	0.0037527	0.0037466	0.00397405	0.00376172	0.00388457	0.00371934	0.0037266	0.00379185	0.00374353	0.00368667	0.0039164	0.00382301	0.00375993	0.00368159	0.00381424	0.00438142	0.0043612	0.00382884	0.00440067	0.00375051	0.00379411
PARTHENOLIDE	0.00441226	0.00376857	0.00382861	0.0036596	0.00371496	0.0036851	0.00383523	0.00381899	0.00381046	0.0037449	0.00465353	0.00380537	0.00454289	0.00434983	0.00356484	0.00375761	0.00359117	0.00359589	0.00370639	0.00367685	0.00410866	0.00472729	0.00363516	0.0038152	0.00371318	0.00380921	0.00375079	0.0035461	0.00362862	0.00403365	0.00362642	0.00371915	0.0039212	0.00372363	0.0039451	0.00370644	0.00375829	0.00394555	0.00392589	0.00374818	0.00363213	0.00368311	0.00414048	0.00394166	0.00378602	0.00438066	0.00387655	0.00530054	0.00381492
PAZOPANIB	0.00373597	0.00370978	0.00360949	0.0043627	0.00381774	0.00389515	0.00370129	0.00362319	0.00361617	0.0042934	0.00434792	0.00549488	0.00358068	0.00541916	0.00443948	0.00456078	0.00410192	0.00437081	0.00462436	0.00373515	0.00361845	0.00356406	0.00440172	0.00371464	0.00415918	0.00370863	0.00388628	0.00411201	0.00476213	0.0035618	0.00434416	0.00373359	0.00371426	0.00415553	0.00370792	0.00414689	0.00373717	0.00382039	0.00367736	0.00374427	0.00372978	0.00383205	0.00354003	0.0036257	0.0039675	0.00351279	0.0036643	0.00361194	0.00403485
PF543	0.00389108	0.00386453	0.00368228	0.00392686	0.00383201	0.00511471	0.00436835	0.00384198	0.00382208	0.00375204	0.00372264	0.00396552	0.00377472	0.0041048	0.00371186	0.00423709	0.00381602	0.00366328	0.00388017	0.0045833	0.00443261	0.00468181	0.00373913	0.00371883	0.00448156	0.00373404	0.00414054	0.00412047	0.0037864	0.00376941	0.00380563	0.00458427	0.00406228	0.00473773	0.00509428	0.00407999	0.00462121	0.00503009	0.00408721	0.0040564	0.00453532	0.00548299	0.00376746	0.00444322	0.00371902	0.00375878	0.00448656	0.00397214	0.00378123
PF750	0.00440694	0.00462292	0.00382416	0.00363291	0.00391137	0.00374974	0.00363077	0.00391875	0.00456629	0.004306	0.00378321	0.00373008	0.00395577	0.00366676	0.0035755	0.00486729	0.00365137	0.0037105	0.00364123	0.00406869	0.00377233	0.00389475	0.00367924	0.00493234	0.00366778	0.00376363	0.00370963	0.00374184	0.00398497	0.00402168	0.00368992	0.00381374	0.00369769	0.0036632	0.00374612	0.00367737	0.0038715	0.00365538	0.00371596	0.00374148	0.00394859	0.00367952	0.00429365	0.00370102	0.00380834	0.00408095	0.00373559	0.00444279	0.00375839
PHA793887	0.00367736	0.00369966	0.00374169	0.00361822	0.00380528	0.00380132	0.00692984	0.00365419	0.00403488	0.0040547	0.00440733	0.0037455	0.00376104	0.00437961	0.00375824	0.00381831	0.00471021	0.00370655	0.00469186	0.00372381	0.00381646	0.00366273	0.00434208	0.00366695	0.00430956	0.00428212	0.00679857	0.00377846	0.00447261	0.00381922	0.00393988	0.00388526	0.00380343	0.00372196	0.0037741	0.00406581	0.00390772	0.00367999	0.00412917	0.00381997	0.00377416	0.00390213	0.0038987	0.00386964	0.00376627	0.00385095	0.00391736	0.00419816	0.00375784
PHLORETIN	0.00401911	0.00432984	0.0051508	0.00353229	0.00376292	0.00377164	0.00383304	0.00477192	0.00384031	0.003912	0.00379153	0.00362545	0.00404269	0.00363442	0.00351748	0.0046662	0.00357109	0.00353382	0.00363378	0.00417835	0.00388513	0.00394339	0.00358909	0.00509979	0.00357636	0.00382708	0.00365314	0.00408755	0.00382169	0.00391841	0.0035355	0.00386945	0.00365417	0.00363249	0.0036294	0.00364141	0.00371927	0.00357132	0.00383396	0.0036594	0.00382046	0.00356341	0.00405312	0.00368186	0.00370162	0.00402109	0.00370372	0.00402408	0.00369965
PI103	0.00359941	0.00363706	0.00354953	0.00391449	0.00379804	0.0039645	0.00366767	0.00363593	0.00369164	0.00448229	0.00392239	0.00378599	0.00354864	0.00417629	0.00577449	0.00381474	0.00421771	0.00750651	0.00386676	0.00423676	0.00363225	0.0035723	0.00418409	0.00365441	0.00462079	0.0036504	0.0041205	0.00428961	0.00421281	0.00360202	0.00399302	0.00364186	0.00363623	0.00362092	0.00363066	0.00370335	0.0035632	0.00408144	0.00361962	0.00367762	0.00396877	0.00379169	0.00352081	0.00356932	0.00382513	0.0035094	0.00358559	0.00360887	0.00381848
PIFITHRINALPHA	0.00384333	0.00412632	0.00378415	0.00369124	0.00392277	0.0040314	0.00377398	0.00388171	0.00390345	0.00404806	0.00386389	0.00378203	0.00386027	0.00447262	0.0037526	0.00430652	0.00370947	0.00363391	0.00368617	0.00374276	0.0041083	0.00390333	0.00368059	0.00400795	0.00366984	0.00401513	0.00365473	0.00372813	0.00369557	0.00455825	0.00363458	0.0038926	0.0038885	0.00378211	0.00382388	0.00368658	0.0037591	0.004353	0.00393541	0.00374749	0.00372767	0.00385689	0.00385616	0.00382192	0.00371	0.00385045	0.00373769	0.00377815	0.00378672
PIFITHRINMU	0.00387068	0.00428768	0.00460251	0.00366677	0.00382099	0.00368641	0.00373888	0.00396721	0.00390584	0.0038457	0.00374447	0.00364943	0.00382871	0.00368892	0.00355832	0.00386631	0.00365022	0.00354038	0.00363269	0.00416547	0.00440212	0.00400527	0.00369259	0.0039226	0.00370901	0.00437438	0.00368566	0.00362627	0.0036457	0.004413	0.00360594	0.00375387	0.00391751	0.00403339	0.00379023	0.00386354	0.00447746	0.00371136	0.00381868	0.00379476	0.0037839	0.0036672	0.00417544	0.0039159	0.00392179	0.00439287	0.00397314	0.00378688	0.00366363
PIPERLONGUMINE	0.00386963	0.00385865	0.00386102	0.00369072	0.0038319	0.00365444	0.00449928	0.00389216	0.00417646	0.00379975	0.00380602	0.00358448	0.00381404	0.00369567	0.00365344	0.00376667	0.00364939	0.00357373	0.0035915	0.003927	0.00454867	0.00387983	0.00403959	0.00450903	0.00374858	0.00383792	0.00379746	0.00363245	0.00364365	0.00550875	0.003608	0.00373399	0.00364754	0.00366143	0.00370446	0.00365107	0.00376473	0.00399396	0.00364563	0.00364854	0.00368229	0.00368053	0.00489291	0.00366427	0.00369238	0.0051346	0.00367759	0.00391777	0.00365004
PLX4720	0.00389492	0.00403788	0.00373621	0.00375181	0.00393984	0.00435191	0.00365418	0.00376125	0.0039994	0.00378128	0.00372009	0.0038443	0.0039739	0.00376716	0.00371951	0.00405925	0.00365198	0.00367705	0.00369967	0.00389326	0.00428894	0.00383215	0.00368894	0.00389334	0.00363215	0.00400495	0.00375071	0.00390238	0.00377402	0.00383069	0.0037477	0.00373714	0.00390826	0.00382032	0.0038534	0.00378218	0.00374661	0.00411563	0.00383838	0.00383983	0.00373412	0.00381932	0.00443145	0.00386059	0.00385833	0.00437789	0.00379254	0.00405311	0.00385119
PRIMA1	0.00384729	0.0039616	0.00384648	0.00363395	0.003759	0.00374352	0.0036792	0.0039525	0.00390454	0.0037268	0.00386384	0.00372904	0.00401584	0.00446453	0.00364477	0.00381968	0.00362697	0.0036791	0.00368153	0.00416128	0.00394594	0.00449228	0.00367275	0.00376967	0.00395909	0.00391741	0.00367286	0.00360335	0.00368099	0.00397208	0.00362275	0.00443759	0.00394319	0.00424385	0.00391922	0.0039354	0.00386578	0.00422432	0.00400149	0.0038344	0.0038385	0.0037946	0.00430012	0.00433644	0.00365563	0.00426029	0.00386781	0.00386632	0.00367255
PRIMA1MET	0.00370347	0.00378077	0.00417559	0.00362744	0.00385155	0.00364419	0.00372926	0.00374873	0.00381541	0.00376574	0.00477613	0.00365541	0.00401834	0.00367813	0.00380116	0.00451588	0.00370803	0.00377728	0.00363291	0.00370869	0.00367133	0.00434027	0.0036251	0.00375017	0.00394492	0.00443821	0.00372754	0.00360835	0.00374336	0.00401283	0.0036822	0.00382374	0.00452691	0.00463816	0.00518945	0.00549795	0.00464155	0.00389252	0.00438578	0.00476195	0.00407889	0.00384629	0.00431601	0.00496925	0.00378316	0.00442698	0.00475122	0.00385334	0.00370438
PRL3INHIBITORI	0.00451336	0.00379146	0.00379573	0.00375899	0.00451894	0.00383894	0.00441645	0.00488943	0.0038035	0.00379378	0.0037826	0.00378129	0.00389555	0.00374859	0.00382075	0.00383267	0.00376942	0.00373025	0.00382951	0.00430079	0.00436523	0.0044874	0.00376664	0.00505431	0.00376748	0.00374141	0.00372472	0.00424003	0.00375237	0.00394783	0.00380091	0.00390105	0.00373843	0.00369407	0.0037307	0.0038048	0.0037895	0.00373477	0.00371247	0.00372288	0.00378955	0.00368463	0.00393301	0.00370583	0.00385247	0.00381182	0.00371844	0.00375214	0.00479901
PROCARBAZINE	0.00502904	0.00392898	0.00423601	0.00363337	0.00372862	0.00382152	0.00365116	0.00451754	0.00395665	0.00370356	0.00370648	0.00383064	0.00392218	0.00395427	0.00363678	0.00473926	0.00396779	0.00356875	0.0036558	0.00382522	0.00462905	0.00482394	0.00371135	0.00389002	0.0036552	0.00396989	0.00365585	0.00361508	0.00357456	0.00393918	0.00360081	0.00389452	0.00387139	0.00407602	0.00380557	0.00376305	0.00378087	0.00429162	0.00440559	0.00399991	0.00428239	0.00384306	0.00366563	0.00391241	0.00392205	0.00366543	0.00382438	0.00369713	0.00428098
PROCHLORPERAZINE	0.00370111	0.00458791	0.00365079	0.00448267	0.00379516	0.00383018	0.00365578	0.00378109	0.00382818	0.00400857	0.00369848	0.00387699	0.0036067	0.00378301	0.00382039	0.00460021	0.00394945	0.00370397	0.00395299	0.0057475	0.00411618	0.00396402	0.00410922	0.00368407	0.0045792	0.0037148	0.0036637	0.00399748	0.00384591	0.00361679	0.0041497	0.00395497	0.00373673	0.003999	0.00392344	0.00370457	0.00366482	0.00474352	0.00365825	0.00425682	0.00409027	0.00550635	0.00361557	0.00362303	0.00381454	0.0035717	0.00365699	0.00382344	0.00381346
PURMORPHAMINE	0.00372577	0.00395278	0.00381999	0.00468463	0.00435411	0.0037818	0.00368313	0.00360989	0.00375991	0.00378235	0.00411986	0.00375193	0.00382	0.00390848	0.0038387	0.00454975	0.00377526	0.00435338	0.00435639	0.00373415	0.00363538	0.00381182	0.00428188	0.00380649	0.00405829	0.0038447	0.00375086	0.00383941	0.00420218	0.00406083	0.00412108	0.00369313	0.00399317	0.00401766	0.00395894	0.00438854	0.00467864	0.0037472	0.00393347	0.00394224	0.0037372	0.0037356	0.00377027	0.00410571	0.00401384	0.00376903	0.00412338	0.00372355	0.00388517
PX12	0.00378625	0.00383743	0.00384034	0.00372134	0.00378104	0.00375271	0.00382232	0.0037697	0.00394401	0.00374906	0.00377092	0.00367674	0.00381514	0.00403325	0.00358722	0.00387043	0.00365636	0.00361864	0.00372922	0.00442918	0.00395689	0.0038019	0.00378912	0.00378166	0.00415041	0.00380467	0.0040485	0.0036754	0.00383691	0.0043209	0.00368762	0.00374537	0.00366243	0.00370952	0.00367403	0.0037314	0.00376005	0.00373385	0.00372262	0.00371933	0.00375253	0.00367442	0.00405328	0.00371088	0.00379611	0.00411359	0.00367515	0.00380247	0.00372167
PYRAZOLANTHRONE	0.00436963	0.00437072	0.00416687	0.00388864	0.00376536	0.00497276	0.00363654	0.00521354	0.00371738	0.00463547	0.00391602	0.00459491	0.00380872	0.00381515	0.00372678	0.0038053	0.00383434	0.00371162	0.00413649	0.0037812	0.00380393	0.00445104	0.00374933	0.00388484	0.00370134	0.00379873	0.00372486	0.00462386	0.00445446	0.0036894	0.00378443	0.00393878	0.00380791	0.00382864	0.00408284	0.00370779	0.0043933	0.00411984	0.00372143	0.00377778	0.00373217	0.00387975	0.00373527	0.0037317	0.00379888	0.00369992	0.00377484	0.00402774	0.00449566
QS11	0.00424799	0.00371111	0.00375833	0.00373922	0.00442201	0.00381602	0.00373742	0.00382519	0.00458083	0.00369512	0.00380046	0.0037399	0.0051307	0.00413224	0.00375846	0.00385856	0.00366965	0.00452999	0.00377141	0.003737	0.00444088	0.00437603	0.00422665	0.00376532	0.00385781	0.00374273	0.0038012	0.00370899	0.00380804	0.00372948	0.00377988	0.00374324	0.00372723	0.00375712	0.004341	0.00370751	0.00380626	0.0042571	0.0038836	0.00378021	0.00370483	0.00375574	0.00373944	0.00371743	0.00387749	0.0037083	0.00374024	0.00412662	0.00511523
QUIZARTINIB	0.00374371	0.00372192	0.0036634	0.00392869	0.00378799	0.00407525	0.00364875	0.00395052	0.00359788	0.00411295	0.00395771	0.00473594	0.00362964	0.00407116	0.00479056	0.00449845	0.00410305	0.00474749	0.00412561	0.00374156	0.00365792	0.00372724	0.00380026	0.00431716	0.00384044	0.00366325	0.00388536	0.00402555	0.00420694	0.0035717	0.00394662	0.00375437	0.00374531	0.00369446	0.00361233	0.00374875	0.00363986	0.00385379	0.00366074	0.00369269	0.00424225	0.00388029	0.00356472	0.00364258	0.00381627	0.0035643	0.00367326	0.00363769	0.00458278
RG108	0.00390076	0.00383516	0.00384805	0.00357103	0.00394385	0.00369541	0.00373947	0.00371755	0.00508556	0.00377007	0.00385556	0.00368031	0.00388438	0.0036465	0.00384514	0.00412344	0.00373026	0.00366299	0.0036818	0.00418842	0.00373693	0.00381246	0.00371167	0.00380252	0.00380992	0.00380244	0.00377129	0.00372135	0.0037327	0.00459195	0.0037494	0.00372022	0.00383613	0.00397358	0.00406063	0.00473714	0.00447319	0.00393576	0.00414267	0.00449542	0.00385481	0.00381918	0.00382553	0.00394426	0.00419993	0.00379907	0.00395739	0.00375283	0.00388287
RITA	0.00380117	0.00388949	0.00447245	0.00420059	0.00444575	0.00379012	0.00374587	0.00381589	0.00378705	0.00377872	0.00374597	0.0037325	0.00383536	0.00375996	0.00363348	0.00375524	0.00438873	0.00364468	0.00370897	0.0037759	0.0038696	0.00392959	0.00372617	0.00383895	0.00377373	0.00387269	0.00367207	0.00367501	0.00368785	0.00400655	0.0036988	0.00379374	0.0039629	0.00405331	0.00441009	0.00433417	0.00399302	0.00415064	0.00402639	0.00388013	0.00381787	0.00379403	0.00455293	0.00405999	0.00376326	0.00456404	0.00397356	0.00378847	0.00371178
RUXOLITINIB	0.0037406	0.00370731	0.00394158	0.00391119	0.00380588	0.00394835	0.0037475	0.00374631	0.00365721	0.00483107	0.00414366	0.00401244	0.00365886	0.00396322	0.00399224	0.0039734	0.00397752	0.00435553	0.00393604	0.00377536	0.00360923	0.00380426	0.00380241	0.00369107	0.00391499	0.00400995	0.00417262	0.0044091	0.00419716	0.0036093	0.0038775	0.00368583	0.00398307	0.00393637	0.00378144	0.00403481	0.00450328	0.00372976	0.00402631	0.00386068	0.00370067	0.00371223	0.00362658	0.00390914	0.00398961	0.00365428	0.00420354	0.00370937	0.00401137
SALERMIDE	0.00381449	0.00396462	0.00406385	0.00358632	0.00445463	0.00368461	0.00368964	0.00563159	0.00378455	0.00375627	0.00387298	0.00367745	0.00419374	0.00362762	0.00368079	0.00442079	0.00358659	0.00362814	0.00357073	0.00414092	0.00384554	0.00460789	0.00368001	0.00574651	0.0037488	0.00431855	0.00365496	0.00369658	0.00363771	0.00401278	0.00360986	0.00380883	0.00353321	0.00356089	0.00363552	0.00359386	0.0036541	0.00355612	0.00356297	0.00360306	0.00377535	0.00359237	0.00439216	0.00357727	0.00367467	0.00427556	0.00359118	0.00397313	0.0037235
SARACATINIB	0.00360048	0.00357752	0.00354298	0.00725805	0.00389182	0.00389233	0.0037133	0.0035209	0.00356858	0.00405278	0.00398706	0.00393424	0.00346853	0.00427427	0.00441208	0.00384073	0.00516841	0.00404063	0.00502583	0.00370463	0.0035191	0.00346819	0.00455713	0.00354026	0.00481116	0.00370015	0.00363451	0.00430762	0.00430043	0.00348582	0.00654421	0.00372854	0.00358287	0.00368583	0.00361726	0.0036842	0.00358771	0.00390399	0.00357614	0.00368568	0.00373995	0.00398702	0.00344228	0.00353344	0.00400714	0.00343221	0.00355949	0.00350699	0.00401749
SB225002	0.00457169	0.00375289	0.00377932	0.00364754	0.00380691	0.00492354	0.00438058	0.00450341	0.00395947	0.00385126	0.0037193	0.0044518	0.00373838	0.00405945	0.00359676	0.00386089	0.00391986	0.00363821	0.00383832	0.00375564	0.0048752	0.00449553	0.00473971	0.00392948	0.00367358	0.00382482	0.00407584	0.00367912	0.00369607	0.00386149	0.00367717	0.00410461	0.00382919	0.00375162	0.00394103	0.00365719	0.00372535	0.00382754	0.00386747	0.00366724	0.00402573	0.00373184	0.00388416	0.00381762	0.00375206	0.00389438	0.00379204	0.00374618	0.00389279
SB431542	0.00377472	0.00372	0.00394926	0.00385235	0.00387899	0.00449447	0.0036472	0.00365366	0.00371481	0.00387635	0.0038206	0.0038941	0.00364372	0.00412489	0.0041632	0.00390016	0.00382578	0.00455646	0.00385796	0.00375925	0.0036542	0.00373716	0.00374934	0.00367408	0.00410354	0.00383013	0.0039474	0.00386486	0.00394583	0.00363419	0.00428971	0.00373412	0.00406247	0.00403374	0.00389996	0.00427105	0.00384428	0.00397867	0.00412466	0.00454205	0.00417407	0.00429792	0.00370002	0.00409343	0.00434567	0.00367952	0.00437726	0.00361047	0.00424189
SB525334	0.00380453	0.00374932	0.00375008	0.00381197	0.00378358	0.00407506	0.00364989	0.00379776	0.00373871	0.00435376	0.00390334	0.00393778	0.00366223	0.00434478	0.00406933	0.00456121	0.00377093	0.00411162	0.0037959	0.00376692	0.00370096	0.00419065	0.00369955	0.00377444	0.00381577	0.00378108	0.00438077	0.00399926	0.00447381	0.00362987	0.00418925	0.00365773	0.00388342	0.00380421	0.00375736	0.00385258	0.00379825	0.00397149	0.00421987	0.00390645	0.00378255	0.00382442	0.00368413	0.0038281	0.0045834	0.00366545	0.00385053	0.00365551	0.00434152
SCH79797	0.00376989	0.00376758	0.00377845	0.00370994	0.00382019	0.00381811	0.00395115	0.00382148	0.00378306	0.00385017	0.0037816	0.00371187	0.00395274	0.00409969	0.00374935	0.00374949	0.00382774	0.00443356	0.00381168	0.00495406	0.00368964	0.00372286	0.00434667	0.00387247	0.00459485	0.00370609	0.00458334	0.00377563	0.00389347	0.00412132	0.00380625	0.00369802	0.00359698	0.0036272	0.00363948	0.00365501	0.0036657	0.00364397	0.00365713	0.00369389	0.00386411	0.00376402	0.00384182	0.00364231	0.00439857	0.00394871	0.00366903	0.00390615	0.00420971
SELUMETINIB	0.00370475	0.00385091	0.00420987	0.00505754	0.00387532	0.00437656	0.00365417	0.00364026	0.00366687	0.0037494	0.00367044	0.00398224	0.00371434	0.00440595	0.00389959	0.00392753	0.00389693	0.00431308	0.00448285	0.00389685	0.00377627	0.00366427	0.00382519	0.00370768	0.00388236	0.00447671	0.00370569	0.00541743	0.00408495	0.00360656	0.0044545	0.00405608	0.00378826	0.00378959	0.00367655	0.00369871	0.00369517	0.00389426	0.0040165	0.00375928	0.00378982	0.00407499	0.00367108	0.00381013	0.00443527	0.0036676	0.00377711	0.00371673	0.00391848
SERDEMETAN	0.00375326	0.00400071	0.00372681	0.00385186	0.00427378	0.00393656	0.00371616	0.00375482	0.00448688	0.00450054	0.00370511	0.00370353	0.00374868	0.00406217	0.00378138	0.00375016	0.00379222	0.00421888	0.00400258	0.00539499	0.00371134	0.00374023	0.00401059	0.0037926	0.00461907	0.00371153	0.00401688	0.00385787	0.0037625	0.00387242	0.00429181	0.00453634	0.00364823	0.00380374	0.00373501	0.00373404	0.00368379	0.00382758	0.00365401	0.00391047	0.00384382	0.00442536	0.00374307	0.00362982	0.0038793	0.00371599	0.00364473	0.00380041	0.00371043
SGX523	0.00384938	0.00372074	0.00383218	0.00385006	0.00380976	0.00398705	0.00367549	0.00368711	0.0036757	0.00447692	0.00424371	0.00480201	0.00371878	0.00461514	0.00384073	0.00379256	0.00373064	0.00378766	0.00399056	0.00368721	0.00382539	0.00390587	0.00368969	0.00365557	0.00369769	0.00450274	0.00380869	0.00378336	0.00391451	0.00367637	0.00375001	0.0039971	0.00472496	0.00399498	0.00378414	0.00395672	0.00407907	0.0040137	0.00427168	0.00387122	0.00371118	0.00373947	0.0038057	0.00460355	0.00389775	0.00382699	0.00451808	0.00362705	0.0045218
SID26681509	0.00386743	0.00450654	0.00387378	0.00353044	0.00387656	0.00369419	0.00373517	0.00422982	0.00493398	0.00376223	0.00440575	0.0036308	0.00397463	0.00362614	0.00360256	0.00426237	0.00363997	0.00354982	0.003561	0.00535889	0.00389406	0.00412444	0.00368031	0.00412751	0.00371087	0.00377661	0.00370117	0.00419548	0.00372198	0.00482358	0.0035915	0.00381448	0.0037002	0.00371917	0.00374378	0.00376641	0.00422775	0.00365702	0.00381445	0.00391747	0.00424024	0.00366913	0.0042462	0.00374773	0.00386077	0.00428815	0.00374569	0.0040814	0.00367984
SILDENAFIL	0.00443256	0.00443169	0.00402884	0.00379998	0.00379576	0.00376964	0.00375086	0.0037311	0.00372387	0.00376385	0.004811	0.00384635	0.00380716	0.00379119	0.00402711	0.00448601	0.00380341	0.00373587	0.00379059	0.00379865	0.00385308	0.00396007	0.00376701	0.0036657	0.00404748	0.00486664	0.00391897	0.00372848	0.00371614	0.00365566	0.00409797	0.00393239	0.0046194	0.0047674	0.00489868	0.00472948	0.00405383	0.00596729	0.00395621	0.00457774	0.00415225	0.00493152	0.00373824	0.0040738	0.00388774	0.00372528	0.00401632	0.00367414	0.00392892
SIMVASTATIN	0.00383564	0.00391456	0.00454289	0.00419043	0.00379356	0.00368795	0.00376562	0.00367295	0.00375553	0.00371611	0.00500398	0.00376645	0.00376521	0.00375112	0.00362846	0.00379594	0.00365651	0.0036721	0.00372127	0.00370556	0.00370975	0.00477133	0.00363517	0.00369254	0.00370316	0.00452724	0.00372784	0.00366984	0.00368204	0.00373219	0.00365268	0.00382303	0.00425631	0.00425393	0.0040223	0.00405854	0.00400524	0.00386628	0.00453678	0.00501153	0.00408318	0.00407064	0.00382979	0.00426505	0.00392381	0.00385711	0.00433242	0.00518242	0.00365073
SIROLIMUS	0.00365718	0.00365428	0.00363335	0.00370224	0.00372372	0.00375833	0.00380274	0.00358402	0.00378105	0.00432254	0.0055689	0.00375203	0.00362171	0.0039119	0.00630714	0.00459888	0.00449425	0.00600992	0.00372328	0.00367672	0.00364504	0.00374063	0.00372184	0.00372073	0.00383431	0.00368158	0.00387237	0.00397433	0.00418969	0.00358704	0.00378263	0.00372314	0.00420136	0.00366152	0.00365827	0.00407444	0.00367993	0.00371403	0.00376305	0.00372974	0.00432957	0.00366454	0.00364305	0.00398303	0.00370941	0.0036686	0.00416708	0.004109	0.00370139
SITAGLIPTIN	0.0038383	0.00370653	0.00388779	0.00381572	0.00379469	0.00387884	0.00371912	0.00381516	0.00431266	0.00407764	0.00379823	0.00463313	0.00370076	0.00458827	0.00383613	0.00370671	0.0041489	0.00373375	0.00438273	0.00364149	0.00388589	0.0042109	0.00371814	0.00371309	0.00368947	0.00493048	0.0037963	0.00378027	0.00401545	0.00433756	0.0037314	0.00378683	0.00565844	0.00399199	0.00387401	0.00404966	0.00404775	0.00451018	0.00548553	0.00404118	0.0037833	0.00380475	0.00450109	0.00481192	0.00383991	0.00445199	0.00477725	0.00366211	0.00421504
SJ172550	0.0041276	0.00378057	0.00397099	0.00411823	0.00451372	0.0038788	0.00383092	0.00385239	0.00374645	0.00372978	0.00369407	0.00425092	0.00376684	0.00408203	0.00390874	0.00451498	0.0036602	0.00361698	0.00389066	0.00368554	0.00397823	0.00412878	0.00367814	0.00455651	0.00365336	0.00455017	0.00369828	0.00389564	0.00372437	0.00379387	0.00372985	0.00378575	0.00466608	0.00425718	0.0038339	0.00393537	0.00409604	0.00433967	0.0043831	0.00436965	0.00385835	0.00381944	0.00391883	0.00455736	0.00432662	0.00394284	0.00429472	0.00364842	0.00400464
SN38	0.0037064	0.00375198	0.00379169	0.00348231	0.00373532	0.00402281	0.00425542	0.00384585	0.00377465	0.00370835	0.00382585	0.00372485	0.00386531	0.00373299	0.00363399	0.00364755	0.00367281	0.00396659	0.00388998	0.00373307	0.00376404	0.00366299	0.00387038	0.00370926	0.00370212	0.00375012	0.00421971	0.00380762	0.00362653	0.00375456	0.00359619	0.00461945	0.00411982	0.00370848	0.0037403	0.00425673	0.00373999	0.00361439	0.00414195	0.00445646	0.00382723	0.00366154	0.00383335	0.00385406	0.0037097	0.0038486	0.00389278	0.00381643	0.00361786
SORAFENIB	0.00385663	0.00451079	0.00374226	0.00372732	0.00385298	0.00384701	0.00361529	0.00444508	0.00371226	0.00378204	0.00374165	0.00448007	0.00442078	0.00376626	0.00360912	0.00469789	0.00382082	0.00417066	0.00374538	0.00386436	0.0038437	0.00388557	0.00370419	0.0052326	0.00365046	0.00372711	0.00363785	0.00382915	0.00382017	0.00374468	0.00369684	0.00462858	0.00355968	0.0036343	0.00367355	0.00363164	0.00365072	0.00369621	0.00359979	0.00364688	0.00452118	0.0037177	0.00372983	0.0036245	0.00389557	0.00369707	0.00365511	0.00438959	0.00393645
SRT1720	0.00367234	0.00389383	0.00390028	0.00374651	0.00383275	0.00386167	0.00367413	0.00363825	0.00375252	0.00379568	0.00401301	0.00387135	0.00366514	0.00376389	0.00390025	0.0041394	0.00388471	0.00392115	0.00376965	0.00402161	0.00372967	0.00375227	0.00377589	0.00376713	0.00434511	0.0040735	0.00450332	0.00391875	0.00403255	0.00372807	0.00378285	0.00372382	0.00406045	0.00504493	0.00406563	0.00531071	0.00408996	0.00385013	0.00398656	0.00468797	0.00396674	0.00392049	0.00376066	0.00403718	0.00402731	0.00376578	0.00409472	0.00364198	0.00385073
STAUROSPORINE	0.00370828	0.00375444	0.00376373	0.00372471	0.00433163	0.00370497	0.00612754	0.00360744	0.00450856	0.00377116	0.00452463	0.00376594	0.00389653	0.00375353	0.00385827	0.00377608	0.00383337	0.00372374	0.00376404	0.00445274	0.00374242	0.00368247	0.00380577	0.00363739	0.00461098	0.0038052	0.00498519	0.00400057	0.00377848	0.00377257	0.00447416	0.0038924	0.00393136	0.00405337	0.00394707	0.00460305	0.0045918	0.00381372	0.00469111	0.00500541	0.00444658	0.00385237	0.00384761	0.00447474	0.00544919	0.00383657	0.00451578	0.00379886	0.00371345
SU11274	0.00379543	0.00470218	0.00369125	0.0040824	0.00437785	0.00421268	0.00365231	0.00451559	0.00371342	0.00385659	0.00374338	0.00446428	0.00402821	0.00380187	0.00387556	0.00407669	0.00391508	0.00371126	0.00404255	0.00375154	0.00460329	0.00384069	0.00387484	0.00401312	0.00371505	0.00382668	0.00368722	0.00453685	0.00386163	0.00368353	0.00375292	0.00464262	0.00389153	0.00389512	0.00401809	0.0037261	0.00368155	0.00386607	0.00373708	0.00439849	0.00386133	0.00393022	0.00360968	0.00373639	0.00402656	0.00360206	0.00373933	0.00373961	0.00454249
SUNITINIB	0.00378874	0.0045893	0.00372063	0.00390683	0.00384919	0.00418028	0.00367844	0.00381573	0.00371214	0.00413476	0.00369053	0.00519901	0.00425717	0.00428792	0.00384223	0.00382183	0.00444907	0.00370922	0.00404472	0.00382551	0.00498689	0.00366963	0.00386209	0.00404165	0.00430247	0.0037736	0.00368128	0.00459091	0.00419943	0.00360556	0.00391537	0.00449619	0.00444411	0.00456334	0.0044401	0.00383704	0.00374703	0.00463602	0.00427589	0.00412109	0.00392281	0.00485748	0.00364096	0.00379594	0.00377224	0.00361604	0.00377997	0.00373009	0.00382487
TACEDINALINE	0.00430578	0.00386859	0.00393703	0.00354867	0.00375331	0.00366656	0.00379436	0.00508685	0.00501053	0.00379307	0.00380245	0.00380139	0.00373308	0.00409281	0.00390839	0.00457261	0.00403434	0.00373026	0.00362786	0.00434426	0.00557821	0.00375367	0.00486246	0.00451134	0.00379824	0.00371848	0.00421464	0.00377741	0.0037167	0.00377962	0.0036106	0.00393368	0.00359686	0.00366401	0.00363293	0.00368019	0.00361985	0.00371157	0.00367188	0.00370878	0.00516629	0.0037115	0.00359006	0.00360249	0.00450666	0.00359471	0.00360981	0.00390471	0.00375452
TACROLIMUS	0.00376424	0.00383073	0.0037064	0.00378823	0.00381314	0.00393108	0.00375728	0.00373296	0.003701	0.00383729	0.00553157	0.00459394	0.00377469	0.00381574	0.00389682	0.00393966	0.00384233	0.00394255	0.00452771	0.00379254	0.00371558	0.00383208	0.0037999	0.00422668	0.00379037	0.00372283	0.00376374	0.00376053	0.00384583	0.00362496	0.00375034	0.00437281	0.00456068	0.00392034	0.00393546	0.00387032	0.00382445	0.00426096	0.0039029	0.00395996	0.00390341	0.00465693	0.00379197	0.0043145	0.00378221	0.00378624	0.00435697	0.00427944	0.00404453
TAMOXIFEN	0.00520618	0.00372619	0.0044771	0.00373389	0.00386534	0.00385074	0.0045131	0.00481235	0.00379643	0.0042563	0.0037581	0.00392104	0.00386265	0.00414605	0.00368778	0.0038515	0.00369015	0.00362062	0.00438226	0.00383703	0.00411596	0.00400143	0.00368604	0.00498934	0.00373724	0.00383478	0.00373793	0.00368897	0.00366434	0.00379683	0.00369353	0.00376438	0.00422158	0.00382825	0.00379355	0.00370996	0.00373839	0.00467434	0.00416699	0.00410755	0.00377579	0.00389808	0.00377196	0.00381436	0.00377562	0.00375054	0.00381819	0.00373791	0.00450982
TANDUTINIB	0.00372089	0.00368713	0.00363766	0.0051936	0.00392399	0.00384493	0.00364124	0.00370518	0.00365973	0.00398915	0.00376913	0.00415865	0.00366043	0.00408925	0.00378975	0.00379712	0.00392983	0.00395443	0.00529024	0.0037514	0.00362509	0.00370583	0.00446635	0.00376201	0.00566891	0.00373712	0.00364542	0.00391934	0.00394186	0.00360203	0.00517377	0.00400937	0.00368131	0.00396629	0.00431383	0.00401214	0.00376313	0.00427756	0.00361499	0.00404937	0.0037726	0.00442987	0.00359347	0.00365868	0.00379077	0.00361223	0.00367428	0.0036289	0.00405712
TANESPIMYCIN	0.00374675	0.00387795	0.00373183	0.00365802	0.00371709	0.00378094	0.00399037	0.00420224	0.00375485	0.00380952	0.00453518	0.00383202	0.00386079	0.00381912	0.00381356	0.00375112	0.00395232	0.00374319	0.00375126	0.0039292	0.00393047	0.00385677	0.0037255	0.00370949	0.0036697	0.00375074	0.00452654	0.00384313	0.00376645	0.00398663	0.00367027	0.0037795	0.00420676	0.00366504	0.00375698	0.00371195	0.00367079	0.00429021	0.00388606	0.0039997	0.00371864	0.0038465	0.00435975	0.00384452	0.00363474	0.00450306	0.00380447	0.00544693	0.00374485
TEMOZOLOMIDE	0.00447224	0.00367251	0.00441672	0.0037138	0.00381291	0.00407781	0.00377896	0.00374878	0.00375417	0.00374314	0.00376684	0.00388493	0.00461291	0.0044258	0.00365433	0.0037109	0.003659	0.00368455	0.00443627	0.00364787	0.00384951	0.00384103	0.00371982	0.00377086	0.00367116	0.00453728	0.00387076	0.00368304	0.00372288	0.00372785	0.00364826	0.0037511	0.00390868	0.00373438	0.00376664	0.00371085	0.00373303	0.00385117	0.00445239	0.00381306	0.00365582	0.00367508	0.00389317	0.0041864	0.0038464	0.00377436	0.00393034	0.00371484	0.00426779
TEMSIROLIMUS	0.00363067	0.0036981	0.00364388	0.00369171	0.00370608	0.00381091	0.00373277	0.0035963	0.00371892	0.00433974	0.00562886	0.00377476	0.00363628	0.00389336	0.00598352	0.0049852	0.00441309	0.00588057	0.00372847	0.0037831	0.00364468	0.00371045	0.00369803	0.00386065	0.00383611	0.003682	0.00375985	0.00405513	0.00476647	0.00365181	0.00373591	0.00369949	0.00421234	0.00369653	0.00367479	0.00410433	0.00373937	0.00368375	0.00378903	0.00376072	0.00411152	0.00367171	0.00366432	0.00408185	0.00373528	0.00368174	0.00410791	0.0041395	0.00374129
TENIPOSIDE	0.00374186	0.00366124	0.00393009	0.00353915	0.00372574	0.00434037	0.00461443	0.00388111	0.00383991	0.00373147	0.00411578	0.00366463	0.00387455	0.00370274	0.00358455	0.00365641	0.00382847	0.00362524	0.00419841	0.0037464	0.0036959	0.00373148	0.00429629	0.00386096	0.0038096	0.00381935	0.00428563	0.00368586	0.00369943	0.00373929	0.00366913	0.00411521	0.0037271	0.00359758	0.00362619	0.00372552	0.00378202	0.00356948	0.00381015	0.00372877	0.00366859	0.00359008	0.00393554	0.00381431	0.00366409	0.00396846	0.0039419	0.0038532	0.00361783
TG100115	0.00383481	0.00370106	0.00381559	0.003764	0.00377244	0.00446679	0.0036891	0.00388328	0.00373494	0.00383286	0.00374084	0.00473785	0.00366479	0.00452065	0.00461675	0.00368331	0.00379844	0.00482656	0.00455893	0.0036163	0.00382359	0.00379543	0.00373121	0.0037049	0.00376823	0.00394983	0.00454448	0.00388841	0.00399941	0.00362716	0.00371714	0.00387768	0.00482932	0.00389582	0.00375975	0.00383325	0.00380226	0.00431826	0.00522057	0.00400239	0.00407163	0.00379077	0.00379211	0.00445261	0.0039104	0.00377565	0.00429837	0.00360807	0.00478763
TG101348	0.0036072	0.00394364	0.00356823	0.0046159	0.00379318	0.0039006	0.00374588	0.00368201	0.00375629	0.00397312	0.00374635	0.00388832	0.00355928	0.00433127	0.0042914	0.00369112	0.00493403	0.00395059	0.00468502	0.00450797	0.00378102	0.00354667	0.00688213	0.00363026	0.00472965	0.00365458	0.00377808	0.00573046	0.00495363	0.00358165	0.00429626	0.00384103	0.00367648	0.0042581	0.00405899	0.0037795	0.00368959	0.00438842	0.0036682	0.00424089	0.00457453	0.00469935	0.00358692	0.00361273	0.00444128	0.00357273	0.0036365	0.00367382	0.0038335
TGX221	0.00363097	0.00370436	0.00359591	0.00396929	0.0037849	0.00378382	0.0037824	0.00361679	0.00365641	0.00462287	0.00387638	0.0038475	0.0037697	0.00392375	0.00962527	0.0037263	0.00493791	0.00454782	0.0038059	0.00380992	0.00370288	0.00354514	0.00409906	0.00368255	0.00381042	0.00409257	0.00377247	0.00572318	0.00452747	0.00359307	0.00385237	0.00369437	0.00380505	0.00365975	0.00359463	0.00362039	0.00356978	0.00377465	0.00388215	0.00374305	0.00430886	0.00375859	0.00358893	0.00370866	0.00451973	0.00359783	0.00367426	0.00365242	0.00380846
THALIDOMIDE	0.00423228	0.00386419	0.0038549	0.00361405	0.00567135	0.00369075	0.00375655	0.00407228	0.00575587	0.00366002	0.00377981	0.0036634	0.00452097	0.00374611	0.00359143	0.00383124	0.00420618	0.00358275	0.00366901	0.00380881	0.00413637	0.00395216	0.0037037	0.00380868	0.00442456	0.00380806	0.00367378	0.00361739	0.00358942	0.0047811	0.00466521	0.00381658	0.00391161	0.00385236	0.00443863	0.00392935	0.00401436	0.00407183	0.00446988	0.00434657	0.00386748	0.00385474	0.00394028	0.00455756	0.00381733	0.00388899	0.00451207	0.00376454	0.00384888
TIGECYCLINE	0.0038978	0.0046164	0.0040882	0.00355163	0.00382516	0.00384817	0.00380294	0.00485278	0.0038156	0.00367518	0.00375361	0.00358883	0.00470411	0.00356877	0.00357536	0.00450532	0.00360568	0.00355757	0.00355615	0.00439493	0.00378825	0.00454058	0.00365392	0.0044149	0.00359738	0.00450629	0.00364454	0.00370506	0.00390536	0.00386529	0.00350213	0.0037971	0.00362871	0.0036382	0.00415987	0.00375309	0.00382868	0.00360835	0.00372707	0.00386545	0.00374111	0.00360824	0.00475257	0.0037569	0.00364982	0.00467595	0.00377485	0.00468322	0.00367181
TIPIFARNIBP2	0.00369519	0.00427975	0.003798	0.00373448	0.00447908	0.00486028	0.00368077	0.00413353	0.00377343	0.00377908	0.00372157	0.00394219	0.00371584	0.00376483	0.00384201	0.00405639	0.003736	0.0037236	0.00463737	0.00397369	0.00381266	0.00378886	0.00369699	0.00461882	0.00380409	0.00405037	0.00378544	0.00451293	0.00408702	0.00381468	0.00371198	0.00404143	0.00388966	0.00458515	0.00382014	0.00431852	0.0037848	0.00385074	0.00374895	0.00435144	0.00406312	0.0038258	0.00376712	0.0038222	0.00373605	0.00375832	0.00384493	0.00381128	0.00399598
TIVANTINIB	0.0044621	0.00379246	0.00376299	0.00360944	0.00382488	0.00439569	0.00434067	0.00376442	0.00502324	0.00388551	0.00374449	0.00402058	0.00374176	0.00385709	0.003626	0.00369668	0.00419832	0.00362329	0.00397358	0.00447552	0.0039743	0.00377949	0.00494367	0.00374248	0.00375126	0.00380702	0.00414195	0.00374381	0.00370741	0.00436469	0.0037112	0.00387886	0.00417919	0.003757	0.00375743	0.0037517	0.00381692	0.00382699	0.00422604	0.00415823	0.00370563	0.00377075	0.00386066	0.00397072	0.00431164	0.00385945	0.0039897	0.00377536	0.00376434
TIVOZANIB	0.00410531	0.00371055	0.00359814	0.0048091	0.00424548	0.00428877	0.00361388	0.00369436	0.00361108	0.0040069	0.00368682	0.00530376	0.00364633	0.00472666	0.00395149	0.00380391	0.00456619	0.00437472	0.00431964	0.00379221	0.0036195	0.00358313	0.00401458	0.00398594	0.00401873	0.00367765	0.00370401	0.00500654	0.00461892	0.00351518	0.0048606	0.00390574	0.00359436	0.00373422	0.00359489	0.00357862	0.00355842	0.00383328	0.00356809	0.00366691	0.00377542	0.00397715	0.00351579	0.00354062	0.00397464	0.00348531	0.00355286	0.00364113	0.00491423
TOPOTECAN	0.00369255	0.00369765	0.00380432	0.00346553	0.00373338	0.00398883	0.00526569	0.00381506	0.00380491	0.00373836	0.00416705	0.00372538	0.00382597	0.00370631	0.00363652	0.00368229	0.00372917	0.00363024	0.00389343	0.00370532	0.00377265	0.00364746	0.00391796	0.00368268	0.00389837	0.0037501	0.00558015	0.00380123	0.00364645	0.00376759	0.00380388	0.00407207	0.0041372	0.00366338	0.00372427	0.00426779	0.00379738	0.00361051	0.00416387	0.00443065	0.00377155	0.00363296	0.00383052	0.0038314	0.00371943	0.0038475	0.00385526	0.00383057	0.00362246
TOSEDOSTAT	0.00374324	0.00424795	0.00403784	0.0036	0.00379383	0.00371012	0.00382148	0.00395974	0.00399464	0.00367687	0.00400406	0.00359575	0.00440437	0.00361501	0.00356817	0.00396614	0.00368878	0.00359976	0.00365813	0.00444194	0.00382604	0.00400909	0.00371665	0.004105	0.00366857	0.0039002	0.00373336	0.00367313	0.00381449	0.00417399	0.00358429	0.00385866	0.00404403	0.00384631	0.00383175	0.00416325	0.00412249	0.00363079	0.00481492	0.00387486	0.00389919	0.00366812	0.00477944	0.00467349	0.00384557	0.00454606	0.0047002	0.00425561	0.00364291
TPCA1	0.00369256	0.00479143	0.00364809	0.00411851	0.00379685	0.00400772	0.0037856	0.00383656	0.00380398	0.0038633	0.0037156	0.00397028	0.00438317	0.00387461	0.00383429	0.0038657	0.0052295	0.00379056	0.00450759	0.003893	0.00410707	0.003681	0.00390556	0.00393837	0.00372642	0.00365405	0.00378249	0.00484487	0.00475002	0.00366601	0.00378346	0.00428368	0.00365379	0.00370664	0.00366129	0.00362224	0.00365399	0.00373332	0.00366743	0.00373964	0.00399176	0.00382902	0.00370784	0.00359573	0.00382793	0.00365256	0.00362694	0.00473413	0.00378294
TRAMETINIB	0.00383981	0.00381737	0.00373229	0.00393168	0.0038972	0.00384278	0.00376229	0.00374728	0.003806	0.00374706	0.00368056	0.00388893	0.00376988	0.00480561	0.00477707	0.00373878	0.00377784	0.0037247	0.00383244	0.00371937	0.00462074	0.00376853	0.00376763	0.00377895	0.00369919	0.00390897	0.00372609	0.00505465	0.00384185	0.00372918	0.00382229	0.00380154	0.00416588	0.00376424	0.00371344	0.00365724	0.00365632	0.00429655	0.00453245	0.00371891	0.00374117	0.00405771	0.00376974	0.00409578	0.00377006	0.00378014	0.00379228	0.00371018	0.00383885
TRETINOIN	0.00443544	0.00381744	0.00501925	0.00369856	0.00382933	0.00368338	0.00378574	0.00485085	0.0040085	0.00377356	0.00439362	0.00361648	0.00377811	0.00367749	0.00376945	0.00393617	0.00363241	0.00376429	0.00362374	0.00371639	0.00377327	0.00494312	0.00363328	0.00392993	0.0039939	0.00389045	0.00376015	0.00358998	0.00365261	0.00392516	0.00414177	0.00370771	0.00388719	0.00382152	0.00428199	0.00399833	0.00400903	0.00371823	0.00403311	0.00385335	0.00370883	0.00366577	0.00385755	0.00381196	0.00400868	0.00389123	0.00382506	0.00473274	0.00375714
TRIFLUOPERAZINE	0.00368622	0.00459499	0.00363949	0.00394914	0.00384263	0.00384925	0.00368494	0.00378705	0.00381525	0.00377939	0.00370391	0.00389173	0.00367616	0.00377776	0.00379053	0.00457946	0.00392013	0.00373118	0.00441581	0.00598351	0.00383797	0.0036882	0.00402153	0.0037646	0.00451105	0.00368725	0.0037202	0.00398574	0.0038426	0.00361647	0.0039159	0.00415574	0.00381646	0.00399226	0.00402617	0.00375049	0.00368725	0.00518077	0.00365556	0.00456322	0.00403216	0.00560514	0.00365383	0.00365462	0.00387013	0.00358289	0.00373796	0.00383022	0.00380643
TRIPTOLIDE	0.00381277	0.00378769	0.00376197	0.00353187	0.00377987	0.00369479	0.00628191	0.00366617	0.00400004	0.00382023	0.00487295	0.00368227	0.00376817	0.00371719	0.003676	0.00372901	0.00378944	0.00385438	0.00371206	0.00368039	0.00373979	0.00457496	0.00374844	0.00368659	0.00394476	0.00378411	0.00529832	0.00361889	0.00368937	0.00398352	0.00377453	0.00377238	0.00386212	0.00399853	0.00424553	0.00381978	0.00407611	0.00377645	0.00379649	0.00381908	0.00369499	0.00374268	0.00386554	0.00391918	0.00374924	0.00389008	0.00408862	0.00560927	0.00362457
TUBASTATINA	0.00382329	0.00451789	0.00415612	0.00368326	0.00377647	0.00375061	0.0036885	0.00384513	0.0043389	0.00379825	0.00368666	0.0039943	0.00374165	0.00369818	0.00371748	0.00376018	0.0038316	0.00363835	0.00370978	0.00457368	0.00401497	0.00374669	0.00481001	0.00381072	0.00385385	0.00389584	0.00389025	0.00403504	0.0037395	0.00383384	0.00364342	0.00389492	0.00384353	0.00493663	0.0039623	0.00494188	0.0039711	0.00380964	0.00395257	0.00467154	0.00486344	0.00384627	0.0037993	0.00388514	0.00578157	0.00380492	0.00389775	0.00373334	0.00374862
TW37	0.00378751	0.00440658	0.00386929	0.0035173	0.00385704	0.00379642	0.00367235	0.00539919	0.00382593	0.00369719	0.00369331	0.00418613	0.00387043	0.00368021	0.0035844	0.00498278	0.00366245	0.00377727	0.00373987	0.00399663	0.00422972	0.00394776	0.00368896	0.0044216	0.0037186	0.00369565	0.00367128	0.00362318	0.00358161	0.00402571	0.00355424	0.00437256	0.00356639	0.00360255	0.00361812	0.00357563	0.0035847	0.0036352	0.00355679	0.0036953	0.00406004	0.00364918	0.00372804	0.00359138	0.00375678	0.00370428	0.00364824	0.00385798	0.003748
UNC0321	0.00367434	0.00378259	0.00556738	0.00471209	0.00390528	0.00376531	0.00395112	0.00363614	0.00375491	0.00374638	0.00390903	0.00379096	0.00362338	0.00430088	0.00378145	0.00393396	0.00379103	0.00455994	0.00456439	0.00373661	0.00359995	0.00404681	0.00455424	0.00370889	0.00635691	0.00578925	0.00382942	0.00383598	0.00387317	0.00366287	0.00484045	0.00377335	0.00431795	0.0043281	0.0041718	0.0050504	0.00468136	0.00386146	0.00441934	0.00443335	0.00384239	0.00387255	0.00381739	0.00458038	0.00400356	0.00397932	0.00456351	0.00359928	0.00383946
VALDECOXIB	0.00378008	0.00461019	0.00388727	0.00357927	0.00375489	0.0038644	0.0035984	0.00395073	0.00384898	0.00408959	0.00376642	0.00385453	0.00393182	0.0037359	0.00367191	0.0053228	0.0037736	0.00383521	0.00368614	0.00431767	0.00445772	0.00388467	0.00365407	0.00481558	0.00360004	0.00375628	0.00368446	0.00434617	0.004472	0.00381426	0.00356593	0.0037707	0.00376732	0.00383613	0.00374852	0.00375543	0.00371927	0.00370317	0.0037836	0.00376251	0.00400969	0.00368107	0.00384712	0.00369278	0.003746	0.00378982	0.00373014	0.00400297	0.00387871
VELIPARIB	0.00386077	0.00372536	0.00392028	0.00372467	0.00379598	0.00375717	0.0037473	0.00371817	0.00382947	0.00377988	0.00406214	0.00403113	0.00371563	0.00380848	0.0038034	0.00394598	0.00371354	0.0038033	0.00375536	0.00381325	0.00372249	0.003773	0.00380097	0.0036704	0.00390416	0.00408916	0.00451731	0.00427865	0.00385041	0.00369806	0.00381465	0.00375634	0.00436847	0.004714	0.00412458	0.00554523	0.00437934	0.00422873	0.0050536	0.00460264	0.00390999	0.00394568	0.0038591	0.00434569	0.00452895	0.0038225	0.00438264	0.00364871	0.00412604
VER155008	0.0036972	0.00375219	0.00399423	0.00390503	0.00389178	0.00396176	0.00378504	0.00364269	0.00374115	0.00377503	0.00417853	0.00372257	0.00379328	0.00380526	0.00426613	0.00444733	0.00399066	0.00407259	0.00385125	0.00368405	0.00360243	0.00381302	0.00398195	0.00366982	0.0038476	0.00453454	0.00381688	0.00379387	0.00411462	0.00368526	0.00382215	0.00374137	0.00451112	0.00428102	0.00424511	0.00540251	0.00469506	0.00375259	0.0049346	0.00463535	0.00397704	0.00375349	0.0039746	0.00479762	0.00402988	0.00398322	0.00474168	0.00368803	0.00379787
VINCRISTINE	0.00395245	0.00377745	0.00378038	0.00356024	0.00372028	0.00408088	0.00477223	0.00438983	0.00408071	0.00382042	0.0037914	0.00433106	0.0037262	0.00445623	0.00413729	0.00368446	0.00401803	0.00362508	0.00386189	0.00371469	0.00485393	0.00406336	0.00506311	0.00372065	0.00366344	0.00440055	0.00446529	0.00419946	0.0037614	0.00383293	0.00359947	0.00375663	0.00422498	0.0037075	0.00388676	0.00381334	0.00381459	0.00406799	0.00461151	0.00379502	0.00367143	0.00367753	0.00501924	0.00400956	0.00376188	0.0050372	0.00386456	0.00379694	0.00400309
VORINOSTAT	0.00381371	0.00392157	0.00382304	0.00357412	0.0038026	0.00367834	0.00380669	0.0043199	0.00559498	0.00372026	0.00365613	0.00370322	0.00377424	0.00374806	0.00369093	0.00397169	0.00393973	0.0036022	0.00367934	0.00404585	0.0059235	0.00380695	0.00557155	0.00419314	0.00375684	0.00396191	0.00377442	0.00385248	0.00370673	0.00396651	0.00360867	0.00382119	0.00361125	0.00367713	0.00365586	0.00366575	0.00365702	0.00372858	0.0037427	0.00374906	0.00454563	0.00378612	0.00377243	0.00365587	0.00417439	0.00378303	0.00365193	0.00392556	0.00367436
WZ4002	0.00363203	0.00369403	0.00354814	0.00726324	0.0039385	0.00494105	0.0036119	0.00358092	0.00358194	0.00390859	0.00372316	0.00399185	0.00348553	0.0040743	0.0043978	0.00372307	0.00461334	0.00413239	0.00445135	0.00403602	0.00356061	0.00353093	0.00462568	0.00363523	0.0046018	0.00366698	0.00364144	0.0046865	0.00488756	0.00352274	0.00572113	0.00380051	0.00358543	0.00367826	0.00358222	0.0035798	0.0035748	0.00378657	0.00357436	0.00364756	0.0036949	0.00396165	0.0035139	0.00354257	0.00432197	0.00347034	0.00356108	0.00358986	0.00406262
YK4279	0.00395036	0.00381812	0.00398278	0.00358857	0.00386619	0.00439677	0.0048932	0.00446475	0.00378277	0.00376211	0.00372441	0.00391239	0.00375685	0.00373296	0.00368411	0.00428827	0.00397197	0.00356916	0.00415287	0.00371285	0.00401434	0.00387934	0.00473624	0.00439755	0.00365926	0.00476506	0.00410155	0.00419193	0.00373183	0.003794	0.00362218	0.00392425	0.00410691	0.00378452	0.00378256	0.0037675	0.00383806	0.00392182	0.00414448	0.00378359	0.00372581	0.00374837	0.00453149	0.00403399	0.00373091	0.00453691	0.00437587	0.00378108	0.00373728
YM155	0.00379415	0.0039132	0.0038115	0.00351602	0.00385323	0.00439248	0.00379896	0.00394247	0.00383448	0.00373494	0.00430465	0.00373517	0.00402043	0.00365123	0.00357071	0.00378174	0.00359278	0.00370872	0.00379005	0.00401612	0.00373313	0.00388713	0.00372053	0.00410438	0.00371655	0.00372731	0.00395839	0.00368515	0.00370332	0.00438814	0.00359767	0.00429304	0.00367401	0.00377806	0.00411416	0.00379142	0.00381839	0.00371773	0.00377702	0.00409021	0.00383351	0.00373334	0.00392912	0.00372434	0.00380733	0.00392645	0.00375037	0.00397256	0.00387684
ZEBULARINE	0.00437927	0.00369432	0.00449015	0.00353283	0.00391685	0.00368862	0.003813	0.003742	0.00399706	0.00368305	0.00445461	0.00368873	0.00674495	0.00384998	0.00417141	0.00371517	0.00362086	0.00361308	0.00370657	0.00365339	0.00389757	0.0039162	0.00364951	0.00371056	0.00362244	0.00444017	0.00374665	0.00363854	0.00358611	0.00385127	0.00356112	0.00375578	0.00403238	0.00372242	0.00387356	0.00377909	0.00381943	0.00376301	0.00414741	0.00372264	0.00369973	0.00360899	0.00374187	0.00413941	0.00442512	0.00375633	0.00408277	0.00382842	0.00456168
ZSTK474	0.00360806	0.00358738	0.0035873	0.0038852	0.00373802	0.00388512	0.00367471	0.00363205	0.00363756	0.00477417	0.00401447	0.00385381	0.00354827	0.00474282	0.00686897	0.00390344	0.00452349	0.0069589	0.00387763	0.00424511	0.0035936	0.00355377	0.00396734	0.00364313	0.00416253	0.00364703	0.00434934	0.00425464	0.00430674	0.00352649	0.00387733	0.00373401	0.00363734	0.00357147	0.00354856	0.00367392	0.00356252	0.00370968	0.00361892	0.00364966	0.00387205	0.00367382	0.00348333	0.00356858	0.00383693	0.00349609	0.00359607	0.00362314	0.00379545
[truncated: 190 more columns]

## Sheet: B) Perturbation(CTRPv2)
	ABIRATERONE	ABT737	AC55649	AFATINIB	AGK2	ALISERTIB	ALVOCIDIB	AM580	APICIDIN	AT7867	AVICIND	AXITINIB	AZACITIDINE	AZD1480	AZD6482	AZD7545	AZD7762	AZD8055	BARASERTIB	BAXCHANNELBLOCKER	BELINOSTAT	BETULINICACID	BI2536	BIBR1532	BIX01294	BLEBBISTATIN	BMS345541	BMS536924	BMS754807	BORTEZOMIB	BOSUTINIB	BRDK01737880	BRDK02492147	BRDK13999467	BRDK14844214	BRDK27224038	BRDK27986637	BRDK33514849	BRDK49290616	BRDK50799972	BRDK55116708	BRDK63431240	BRDK71935468	BRDK86535717	BRDK88742110	BRDK94991378	BRDK96431673	BREFELDINA	BRIVANIB
ABIRATERONE	1.36953	0.0504641	0.0443083	0.0622319	0.054328	0.0869983	0.0386433	0.0938218	0.0780847	0.059982	0.0533268	0.0890773	0.0495844	0.0596924	0.0372854	0.0386295	0.0380365	0.0448048	0.0435348	0.0332243	0.0786424	0.103655	0.0463444	0.0481677	0.0605905	0.0347528	0.0374303	0.0378018	0.0497169	0.0628336	0.0630812	0.0548043	0.0889528	0.0934894	0.0548231	0.0529158	0.0601966	0.0839461	0.0765015	0.0519815	0.0482413	0.0506635	0.0438139	0.0717143	0.0469224	0.0440721	0.0822159	0.0456476	0.103821
ABT737	0.0504641	2.36565	0.039676	0.0882848	0.0413999	0.0685764	0.0306397	0.0620956	0.0416691	0.0594875	0.0358307	0.0593315	0.118605	0.0269315	0.0259367	0.0457365	0.0452387	0.0315159	0.0355412	0.171626	0.0324087	0.0572412	0.0502813	0.0552682	0.0338422	0.0359681	0.0273877	0.0662342	0.0691996	0.0576074	0.0490831	0.0694271	0.0416433	0.0475671	0.0485092	0.0304067	0.0570631	0.0361436	0.0364878	0.0710799	0.0491788	0.0635505	0.128044	0.0316116	0.0834286	0.0930358	0.0470238	0.463805	0.048467
AC55649	0.0443083	0.039676	1.78111	0.085676	0.0623564	0.0258441	0.0526384	0.020553	0.0616145	0.0520335	0.0641801	0.0437758	0.0581863	0.0286515	0.0445042	0.0731491	0.051789	0.080753	0.0733978	0.0209214	0.0357009	0.0628701	0.0532698	0.0276193	0.0690409	0.31664	0.0706305	0.0268888	0.0424244	0.0285271	0.0523345	0.0603501	0.0459418	0.0823674	0.0590189	0.0520323	0.0578741	0.051146	0.0488679	0.0708433	0.0498019	0.0604783	0.0456455	0.0646776	0.0728181	0.0621297	0.0686034	0.0276205	0.0350173
AFATINIB	0.0622319	0.0882848	0.085676	1.8427	0.0565175	0.069218	0.0298012	0.0442496	0.0565266	0.0614402	0.0414865	0.0663421	0.0709869	0.0381724	0.0371439	0.0688083	0.0869244	0.0687378	0.052716	0.0568868	0.0421294	0.0703376	0.0634139	0.0523271	0.0417782	0.103381	0.0253953	0.060731	0.0954	0.077366	0.0429921	0.0600033	0.0624592	0.0456864	0.0653534	0.0522543	0.073871	0.0645404	0.0478649	0.0701275	0.040144	0.080591	0.0697208	0.0529772	0.114565	0.0825853	0.0509577	0.0738634	0.0563581
AGK2	0.054328	0.0413999	0.0623564	0.0565175	1.62906	0.0414633	0.043822	0.0537561	0.200417	0.0566912	0.0612429	0.0557874	0.0366573	0.0435546	0.0592793	0.058066	0.0440317	0.0515131	0.0675812	0.047156	0.0506435	0.0562267	0.0549459	0.0392221	0.15567	0.0541902	0.0639401	0.0516341	0.0445248	0.0621905	0.193661	0.0540536	0.0920911	0.0614897	0.0814304	0.055232	0.0505027	0.0685645	0.049209	0.0910942	0.0744341	0.0677449	0.0414962	0.0717221	0.0379499	0.0609098	0.0910197	0.043481	0.0571275
ALISERTIB	0.0869983	0.0685764	0.0258441	0.069218	0.0414633	1.67312	0.02012	0.101099	0.038956	0.0545612	0.0204742	0.0822066	0.0757526	0.0772332	0.0407385	0.0387787	0.0555208	0.0622144	0.0362211	0.0982676	0.0547287	0.0964938	0.0561588	0.118318	0.0223173	0.0384785	0.0222105	0.0957362	0.111904	0.0542714	0.0232366	0.091751	0.0794295	0.069874	0.065767	0.0439781	0.0536873	0.058769	0.0775572	0.0503984	0.0634438	0.0657159	0.0545208	0.0577976	0.0784208	0.0600243	0.058734	0.0671878	0.0803244
ALVOCIDIB	0.0386433	0.0306397	0.0526384	0.0298012	0.043822	0.02012	2.41946	0.050626	0.0544054	0.0383869	0.103721	0.0415706	0.0116514	0.011727	0.0752519	0.0527269	0.0946178	0.0608709	0.0321941	0.0107107	0.0226829	0.0477843	0.0391774	0.0376974	0.141488	0.058235	0.351776	0.0508979	0.0252337	0.0238862	0.134954	0.0353374	0.037648	0.0565267	0.054738	0.0495714	0.0530848	0.0317929	0.0210317	0.0454201	0.0531248	0.0348924	0.00716325	0.0472707	0.0469973	0.0076144	0.0526769	0.0174626	0.0440676
AM580	0.0938218	0.0620956	0.020553	0.0442496	0.0537561	0.101099	0.050626	1.70104	0.0730384	0.0385682	0.0293369	0.0862543	0.0400661	0.0431638	0.0252955	0.0164798	0.0326541	0.022931	0.0646041	0.0930021	0.11023	0.0897899	0.0405233	0.0405599	0.0510502	0.0182328	0.0278936	0.108639	0.0350141	0.0647037	0.0576822	0.0518584	0.0670668	0.0664491	0.0799262	0.0428954	0.0794507	0.0901903	0.0633903	0.0543589	0.0449751	0.07204	0.0429712	0.0516033	0.0556621	0.0383409	0.0561656	0.0587659	0.208341
APICIDIN	0.0780847	0.0416691	0.0616145	0.0565266	0.200417	0.038956	0.0544054	0.0730384	1.73258	0.0613014	0.0935522	0.0380494	0.0394748	0.0363486	0.0434013	0.0425924	0.0416603	0.0320426	0.0348535	0.027646	0.0879516	0.0915026	0.071592	0.0328473	0.28158	0.0381527	0.0745911	0.0366503	0.035621	0.0771089	0.272197	0.0439463	0.0581135	0.0668941	0.0680591	0.0788183	0.0732755	0.064116	0.0435944	0.0469182	0.0479114	0.0471252	0.0566322	0.066163	0.0470022	0.0710094	0.0673234	0.0462588	0.0497339
AT7867	0.059982	0.0594875	0.0520335	0.0614402	0.0566912	0.0545612	0.0383869	0.0385682	0.0613014	2.40286	0.163398	0.0409624	0.0488119	0.0160725	0.202177	0.105944	0.192686	0.0657129	0.0363007	0.107211	0.0166469	0.0405249	0.0972689	0.0396666	0.0832209	0.048597	0.0700326	0.0917483	0.12237	0.0854984	0.0767457	0.0672021	0.0478362	0.0571744	0.0660819	0.110914	0.0552588	0.0363304	0.0276193	0.0522966	0.0821415	0.0618051	0.0340451	0.0482023	0.138835	0.041112	0.0584566	0.0693055	0.0362608
AVICIND	0.0533268	0.0358307	0.0641801	0.0414865	0.0612429	0.0204742	0.103721	0.0293369	0.0935522	0.163398	3.33346	0.0261911	0.0398237	0.00435689	0.225945	0.427943	0.252041	0.0550513	0.0183358	0.0292166	0.0123726	0.0385526	0.0733462	0.0223982	0.386678	0.0325627	0.298047	0.0387067	0.039383	0.0935627	0.246872	0.0256721	0.0320517	0.0524149	0.0486444	0.154377	0.115872	0.0192831	0.0106829	0.0344922	0.0626527	0.0385069	0.0177377	0.0293399	0.105297	0.0235838	0.050171	0.0234722	0.0271846
AXITINIB	0.0890773	0.0593315	0.0437758	0.0663421	0.0557874	0.0822066	0.0415706	0.0862543	0.0380494	0.0409624	0.0261911	1.4112	0.0528089	0.0723595	0.0279062	0.0268364	0.0321446	0.0472526	0.0954467	0.0480088	0.0729273	0.0510866	0.0427726	0.0734125	0.0290911	0.0304876	0.0274556	0.0506358	0.0443984	0.04482	0.0392846	0.0515518	0.0955293	0.10092	0.0795576	0.0525828	0.0499127	0.0792272	0.0899922	0.073144	0.070062	0.0936429	0.0567498	0.0801115	0.0385177	0.052264	0.065441	0.0511876	0.0874296
AZACITIDINE	0.0495844	0.118605	0.0581863	0.0709869	0.0366573	0.0757526	0.0116514	0.0400661	0.0394748	0.0488119	0.0398237	0.0528089	2.04822	0.0379326	0.0216873	0.037244	0.0356917	0.0674934	0.0428578	0.100523	0.0349959	0.0424479	0.0421378	0.0303461	0.0266802	0.0445379	0.0205918	0.0462629	0.067538	0.0570126	0.0312356	0.0840395	0.045533	0.0476926	0.0472549	0.0335627	0.0508483	0.0426284	0.0555001	0.0475755	0.0315127	0.0539775	0.115863	0.0399488	0.0796284	0.0841419	0.0581867	0.13138	0.0480619
AZD1480	0.0596924	0.0269315	0.0286515	0.0381724	0.0435546	0.0772332	0.011727	0.0431638	0.0363486	0.0160725	0.00435689	0.0723595	0.0379326	1.45435	0.00748296	0.00578453	0.00867402	0.0318526	0.0503364	0.0224602	0.119495	0.079062	0.0150872	0.0357744	0.0107335	0.0233141	0.00817516	0.0198851	0.0301452	0.019655	0.0174107	0.0508285	0.0863981	0.060306	0.0607939	0.0168835	0.0256164	0.0931018	0.111208	0.062079	0.0275112	0.0474412	0.0369864	0.0755633	0.0164057	0.0290021	0.0721277	0.0422407	0.0443085
AZD6482	0.0372854	0.0259367	0.0445042	0.0371439	0.0592793	0.0407385	0.0752519	0.0252955	0.0434013	0.202177	0.225945	0.0279062	0.0216873	0.00748296	3.1662	0.169663	0.407211	0.110189	0.0399042	0.0584347	0.00712828	0.0280155	0.0714185	0.042943	0.0904134	0.0450033	0.144972	0.284604	0.16466	0.0443191	0.0829815	0.0475099	0.0381336	0.0374685	0.0437035	0.121006	0.0425923	0.0196752	0.0175791	0.0523499	0.129177	0.0276179	0.00690404	0.0381445	0.0922333	0.0109261	0.0509776	0.0202813	0.0370178
AZD7545	0.0386295	0.0457365	0.0731491	0.0688083	0.058066	0.0387787	0.0527269	0.0164798	0.0425924	0.105944	0.427943	0.0268364	0.037244	0.00578453	0.169663	3.23268	0.161804	0.0751641	0.0276394	0.0392502	0.00779692	0.0436612	0.0626026	0.140712	0.0846595	0.102827	0.151674	0.048479	0.12304	0.0901175	0.0674305	0.0252531	0.0363934	0.0345347	0.0551006	0.159817	0.0788995	0.0202372	0.0152496	0.0452595	0.075852	0.0448123	0.0218419	0.0248813	0.15095	0.0289366	0.0415649	0.0391244	0.0333144
AZD7762	0.0380365	0.0452387	0.051789	0.0869244	0.0440317	0.0555208	0.0946178	0.0326541	0.0416603	0.192686	0.252041	0.0321446	0.0356917	0.00867402	0.407211	0.161804	3.26169	0.0854972	0.0340023	0.0659794	0.0129424	0.0344624	0.119377	0.0437356	0.0772903	0.0772403	0.0965616	0.376994	0.242973	0.0687198	0.0643616	0.05489	0.0376221	0.0527804	0.0618448	0.117455	0.0862669	0.0201738	0.0157349	0.0490518	0.0610261	0.0567887	0.0118628	0.0262312	0.210223	0.0212161	0.0460588	0.0409102	0.0333148
AZD8055	0.0448048	0.0315159	0.080753	0.0687378	0.0515131	0.0622144	0.0608709	0.022931	0.0320426	0.0657129	0.0550513	0.0472526	0.0674934	0.0318526	0.110189	0.0751641	0.0854972	1.99536	0.0590287	0.0621225	0.0179913	0.0361834	0.038946	0.0753167	0.0434309	0.126662	0.0411478	0.0835855	0.0973918	0.027635	0.0526843	0.0942298	0.067209	0.0702532	0.0450937	0.0452324	0.0378125	0.0364558	0.0458689	0.0532652	0.0880254	0.0404104	0.0192145	0.0676093	0.0848144	0.0217135	0.0775624	0.0232359	0.0409749
BARASERTIB	0.0435348	0.0355412	0.0733978	0.052716	0.0675812	0.0362211	0.0321941	0.0646041	0.0348535	0.0363007	0.0183358	0.0954467	0.0428578	0.0503364	0.0399042	0.0276394	0.0340023	0.0590287	1.53254	0.0564079	0.0408042	0.0412898	0.0386459	0.0390485	0.0261915	0.0851196	0.0325353	0.0658502	0.0353635	0.0342597	0.0349952	0.071186	0.0920061	0.0728417	0.0602171	0.0421601	0.0250206	0.0818102	0.0866729	0.120148	0.0701624	0.0750191	0.0320932	0.0783242	0.0419112	0.0388027	0.100197	0.0344117	0.108102
BAXCHANNELBLOCKER	0.0332243	0.171626	0.0209214	0.0568868	0.047156	0.0982676	0.0107107	0.0930021	0.027646	0.107211	0.0292166	0.0480088	0.100523	0.0224602	0.0584347	0.0392502	0.0659794	0.0621225	0.0564079	2.82308	0.0157728	0.0302671	0.0665471	0.0647547	0.0181662	0.0200001	0.0173438	0.204842	0.112491	0.0923876	0.0303378	0.0762313	0.0559083	0.044249	0.0439565	0.0310781	0.0206281	0.0419962	0.0357757	0.0883434	0.0886817	0.0698834	0.0666809	0.0363352	0.135007	0.0726326	0.0469219	0.134264	0.0628946
BELINOSTAT	0.0786424	0.0324087	0.0357009	0.0421294	0.0506435	0.0547287	0.0226829	0.11023	0.0879516	0.0166469	0.0123726	0.0729273	0.0349959	0.119495	0.00712828	0.00779692	0.0129424	0.0179913	0.0408042	0.0157728	1.45063	0.119277	0.0496722	0.0228446	0.0364967	0.0221761	0.016572	0.0217478	0.0148805	0.0333538	0.0285056	0.0370894	0.0643569	0.0676497	0.0625434	0.0233897	0.061837	0.102727	0.123767	0.050745	0.0178756	0.0583771	0.0539113	0.0638442	0.0131831	0.0521667	0.054118	0.0361615	0.0827923
BETULINICACID	0.103655	0.0572412	0.0628701	0.0703376	0.0562267	0.0964938	0.0477843	0.0897899	0.0915026	0.0405249	0.0385526	0.0510866	0.0424479	0.079062	0.0280155	0.0436612	0.0344624	0.0361834	0.0412898	0.0302671	0.119277	1.38281	0.044486	0.0625835	0.0627181	0.0537566	0.0457797	0.0368335	0.0498636	0.0658573	0.0503015	0.0416776	0.085565	0.0537933	0.0984825	0.0552345	0.0957686	0.0735176	0.0745137	0.0616431	0.0323668	0.0710362	0.0540848	0.0691082	0.0418514	0.0494016	0.0647005	0.0668535	0.0822856
BI2536	0.0463444	0.0502813	0.0532698	0.0634139	0.0549459	0.0561588	0.0391774	0.0405233	0.071592	0.0972689	0.0733462	0.0427726	0.0421378	0.0150872	0.0714185	0.0626026	0.119377	0.038946	0.0386459	0.0665471	0.0496722	0.044486	2.49636	0.0461124	0.0373809	0.0445305	0.0901604	0.0669697	0.0526348	0.0672526	0.0323067	0.0739246	0.0432754	0.0715398	0.0530632	0.0517459	0.0658159	0.0461227	0.0335184	0.0551455	0.0719384	0.0903353	0.0449039	0.0396271	0.116041	0.0694108	0.0569802	0.0304115	0.0441445
BIBR1532	0.0481677	0.0552682	0.0276193	0.0523271	0.0392221	0.118318	0.0376974	0.0405599	0.0328473	0.0396666	0.0223982	0.0734125	0.0303461	0.0357744	0.042943	0.140712	0.0437356	0.0753167	0.0390485	0.0647547	0.0228446	0.0625835	0.0461124	2.25953	0.0209908	0.0494347	0.0512551	0.0762131	0.162387	0.0426173	0.0264001	0.056179	0.0547241	0.0450976	0.0599524	0.0422793	0.0368117	0.0353363	0.0393323	0.0499976	0.134838	0.0569156	0.0422613	0.0413402	0.0579763	0.0378434	0.0523255	0.0706802	0.0574304
BIX01294	0.0605905	0.0338422	0.0690409	0.0417782	0.15567	0.0223173	0.141488	0.0510502	0.28158	0.0832209	0.386678	0.0290911	0.0266802	0.0107335	0.0904134	0.0846595	0.0772903	0.0434309	0.0261915	0.0181662	0.0364967	0.0627181	0.0373809	0.0209908	2.22703	0.0526603	0.162097	0.0361625	0.02575	0.0513845	0.708451	0.0344283	0.0529654	0.0556044	0.0578803	0.0880097	0.0747107	0.034372	0.0206693	0.0390987	0.046377	0.0384741	0.0239258	0.0501538	0.0451977	0.03065	0.0558926	0.0261289	0.0384002
BLEBBISTATIN	0.0347528	0.0359681	0.31664	0.103381	0.0541902	0.0384785	0.058235	0.0182328	0.0381527	0.048597	0.0325627	0.0304876	0.0445379	0.0233141	0.0450033	0.102827	0.0772403	0.126662	0.0851196	0.0200001	0.0221761	0.0537566	0.0445305	0.0494347	0.0526603	1.93731	0.0571286	0.0486042	0.0756618	0.0238932	0.0545985	0.0486788	0.0518999	0.0494505	0.0488245	0.0422876	0.0574938	0.0438941	0.0504843	0.0563308	0.0520617	0.0550992	0.0201903	0.0491054	0.101707	0.036156	0.0670986	0.0231683	0.0388458
BMS345541	0.0374303	0.0273877	0.0706305	0.0253953	0.0639401	0.0222105	0.351776	0.0278936	0.0745911	0.0700326	0.298047	0.0274556	0.0205918	0.00817516	0.144972	0.151674	0.0965616	0.0411478	0.0325353	0.0173438	0.016572	0.0457797	0.0901604	0.0512551	0.162097	0.0571286	2.80834	0.0416903	0.0260483	0.0413184	0.111335	0.0325701	0.0314766	0.0449274	0.0524927	0.0936391	0.0614937	0.0196485	0.0172832	0.0405411	0.0694241	0.0334731	0.0125454	0.0419822	0.0661243	0.0151239	0.0524747	0.0182857	0.0334453
BMS536924	0.0378018	0.0662342	0.0268888	0.060731	0.0516341	0.0957362	0.0508979	0.108639	0.0366503	0.0917483	0.0387067	0.0506358	0.0462629	0.0198851	0.284604	0.048479	0.376994	0.0835855	0.0658502	0.204842	0.0217478	0.0368335	0.0669697	0.0762131	0.0361625	0.0486042	0.0416903	2.64148	0.279135	0.0424643	0.0427578	0.0757566	0.0515839	0.0442203	0.0613459	0.0572649	0.0400771	0.0264966	0.0312713	0.0510099	0.0621266	0.0452197	0.0129015	0.0372391	0.126412	0.0211323	0.048104	0.0564688	0.109018
BMS754807	0.0497169	0.0691996	0.0424244	0.0954	0.0445248	0.111904	0.0252337	0.0350141	0.035621	0.12237	0.039383	0.0443984	0.067538	0.0301452	0.16466	0.12304	0.242973	0.0973918	0.0353635	0.112491	0.0148805	0.0498636	0.0526348	0.162387	0.02575	0.0756618	0.0260483	0.279135	2.51918	0.0529219	0.03456	0.0829965	0.0507915	0.0530692	0.0567338	0.0547986	0.0467796	0.0315303	0.0302637	0.056179	0.0804389	0.0546905	0.0247952	0.0380906	0.122431	0.024544	0.0626634	0.135573	0.0339083
BORTEZOMIB	0.0628336	0.0576074	0.0285271	0.077366	0.0621905	0.0542714	0.0238862	0.0647037	0.0771089	0.0854984	0.0935627	0.04482	0.0570126	0.019655	0.0443191	0.0901175	0.0687198	0.027635	0.0342597	0.0923876	0.0333538	0.0658573	0.0672526	0.0426173	0.0513845	0.0238932	0.0413184	0.0424643	0.0529219	2.21489	0.050906	0.0335765	0.0525991	0.0593341	0.0652858	0.0716783	0.0654488	0.0573271	0.0311626	0.0529777	0.0591043	0.0791619	0.152965	0.0373126	0.0863666	0.202212	0.060006	0.108989	0.0521092
BOSUTINIB	0.0630812	0.0490831	0.0523345	0.0429921	0.193661	0.0232366	0.134954	0.0576822	0.272197	0.0767457	0.246872	0.0392846	0.0312356	0.0174107	0.0829815	0.0674305	0.0643616	0.0526843	0.0349952	0.0303378	0.0285056	0.0503015	0.0323067	0.0264001	0.708451	0.0545985	0.111335	0.0427578	0.03456	0.050906	2.08338	0.0364021	0.0531113	0.056534	0.059235	0.0826493	0.0820283	0.0408007	0.0256554	0.0538065	0.0686536	0.049466	0.0220529	0.0573804	0.0570586	0.0284589	0.0608057	0.03553	0.0383906
BRDK01737880	0.0548043	0.0694271	0.0603501	0.0600033	0.0540536	0.091751	0.0353374	0.0518584	0.0439463	0.0672021	0.0256721	0.0515518	0.0840395	0.0508285	0.0475099	0.0252531	0.05489	0.0942298	0.071186	0.0762313	0.0370894	0.0416776	0.0739246	0.056179	0.0344283	0.0486788	0.0325701	0.0757566	0.0829965	0.0335765	0.0364021	1.70223	0.0744172	0.101166	0.0476964	0.029058	0.0274909	0.0656562	0.0465837	0.0657875	0.107944	0.077215	0.0621119	0.0810394	0.0812719	0.0693037	0.0793019	0.0438126	0.0328936
BRDK02492147	0.0889528	0.0416433	0.0459418	0.0624592	0.0920911	0.0794295	0.037648	0.0670668	0.0581135	0.0478362	0.0320517	0.0955293	0.045533	0.0863981	0.0381336	0.0363934	0.0376221	0.067209	0.0920061	0.0559083	0.0643569	0.085565	0.0432754	0.0547241	0.0529654	0.0518999	0.0314766	0.0515839	0.0507915	0.0525991	0.0531113	0.0744172	1.30994	0.0742665	0.0842387	0.0504857	0.0439471	0.0882334	0.0868943	0.0795392	0.0813934	0.086084	0.052683	0.112523	0.0508128	0.0437312	0.118636	0.0447677	0.0785446
BRDK13999467	0.0934894	0.0475671	0.0823674	0.0456864	0.0614897	0.069874	0.0565267	0.0664491	0.0668941	0.0571744	0.0524149	0.10092	0.0476926	0.060306	0.0374685	0.0345347	0.0527804	0.0702532	0.0728417	0.044249	0.0676497	0.0537933	0.0715398	0.0450976	0.0556044	0.0494505	0.0449274	0.0442203	0.0530692	0.0593341	0.056534	0.101166	0.0742665	1.38453	0.102141	0.0615494	0.0668166	0.0870301	0.0669128	0.0794827	0.076662	0.0906102	0.0686807	0.0994455	0.0605165	0.0697025	0.0930389	0.0441906	0.0600333
BRDK14844214	0.0548231	0.0485092	0.0590189	0.0653534	0.0814304	0.065767	0.054738	0.0799262	0.0680591	0.0660819	0.0486444	0.0795576	0.0472549	0.0607939	0.0437035	0.0551006	0.0618448	0.0450937	0.0602171	0.0439565	0.0625434	0.0984825	0.0530632	0.0599524	0.0578803	0.0488245	0.0524927	0.0613459	0.0567338	0.0652858	0.059235	0.0476964	0.0842387	0.102141	1.48835	0.122538	0.118074	0.0563194	0.0682764	0.101769	0.0640506	0.131177	0.0398493	0.0590662	0.0668366	0.0439839	0.0785911	0.0570365	0.0743941
BRDK27224038	0.0529158	0.0304067	0.0520323	0.0522543	0.055232	0.0439781	0.0495714	0.0428954	0.0788183	0.110914	0.154377	0.0525828	0.0335627	0.0168835	0.121006	0.159817	0.117455	0.0452324	0.0421601	0.0310781	0.0233897	0.0552345	0.0517459	0.0422793	0.0880097	0.0422876	0.0936391	0.0572649	0.0547986	0.0716783	0.0826493	0.029058	0.0504857	0.0615494	0.122538	2.20126	0.0982701	0.0401343	0.0284186	0.0566428	0.0820826	0.0503478	0.0188432	0.063415	0.0736508	0.0251737	0.0519141	0.0370957	0.0496692
BRDK27986637	0.0601966	0.0570631	0.0578741	0.073871	0.0505027	0.0536873	0.0530848	0.0794507	0.0732755	0.0552588	0.115872	0.0499127	0.0508483	0.0256164	0.0425923	0.0788995	0.0862669	0.0378125	0.0250206	0.0206281	0.061837	0.0957686	0.0658159	0.0368117	0.0747107	0.0574938	0.0614937	0.0400771	0.0467796	0.0654488	0.0820283	0.0274909	0.0439471	0.0668166	0.118074	0.0982701	1.81346	0.0508575	0.043897	0.0443176	0.0364536	0.0938624	0.025857	0.0361658	0.100881	0.0272022	0.059552	0.0464102	0.045264
BRDK33514849	0.0839461	0.0361436	0.051146	0.0645404	0.0685645	0.058769	0.0317929	0.0901903	0.064116	0.0363304	0.0192831	0.0792272	0.0426284	0.0931018	0.0196752	0.0202372	0.0201738	0.0364558	0.0818102	0.0419962	0.102727	0.0735176	0.0461227	0.0353363	0.034372	0.0438941	0.0196485	0.0264966	0.0315303	0.0573271	0.0408007	0.0656562	0.0882334	0.0870301	0.0563194	0.0401343	0.0508575	1.33444	0.103567	0.0881445	0.0482797	0.0853176	0.0489487	0.082316	0.0298001	0.0545805	0.0770013	0.0337691	0.0595595
BRDK49290616	0.0765015	0.0364878	0.0488679	0.0478649	0.049209	0.0775572	0.0210317	0.0633903	0.0435944	0.0276193	0.0106829	0.0899922	0.0555001	0.111208	0.0175791	0.0152496	0.0157349	0.0458689	0.0866729	0.0357757	0.123767	0.0745137	0.0335184	0.0393323	0.0206693	0.0504843	0.0172832	0.0312713	0.0302637	0.0311626	0.0256554	0.0465837	0.0868943	0.0669128	0.0682764	0.0284186	0.043897	0.103567	1.35697	0.0864787	0.0293046	0.0668195	0.0370308	0.0687208	0.0229475	0.0337931	0.0703573	0.0427716	0.0878105
BRDK50799972	0.0519815	0.0710799	0.0708433	0.0701275	0.0910942	0.0503984	0.0454201	0.0543589	0.0469182	0.0522966	0.0344922	0.073144	0.0475755	0.062079	0.0523499	0.0452595	0.0490518	0.0532652	0.120148	0.0883434	0.050745	0.0616431	0.0551455	0.0499976	0.0390987	0.0563308	0.0405411	0.0510099	0.056179	0.0529777	0.0538065	0.0657875	0.0795392	0.0794827	0.101769	0.0566428	0.0443176	0.0881445	0.0864787	1.47827	0.0680161	0.100116	0.045393	0.0940612	0.0536745	0.0499881	0.075768	0.0808153	0.0590117
BRDK55116708	0.0482413	0.0491788	0.0498019	0.040144	0.0744341	0.0634438	0.0531248	0.0449751	0.0479114	0.0821415	0.0626527	0.070062	0.0315127	0.0275112	0.129177	0.075852	0.0610261	0.0880254	0.0701624	0.0886817	0.0178756	0.0323668	0.0719384	0.134838	0.046377	0.0520617	0.0694241	0.0621266	0.0804389	0.0591043	0.0686536	0.107944	0.0813934	0.076662	0.0640506	0.0820826	0.0364536	0.0482797	0.0293046	0.0680161	1.99636	0.0739434	0.0441586	0.0715311	0.0757483	0.0598	0.0760817	0.0302424	0.0314462
BRDK63431240	0.0506635	0.0635505	0.0604783	0.080591	0.0677449	0.0657159	0.0348924	0.07204	0.0471252	0.0618051	0.0385069	0.0936429	0.0539775	0.0474412	0.0276179	0.0448123	0.0567887	0.0404104	0.0750191	0.0698834	0.0583771	0.0710362	0.0903353	0.0569156	0.0384741	0.0550992	0.0334731	0.0452197	0.0546905	0.0791619	0.049466	0.077215	0.086084	0.0906102	0.131177	0.0503478	0.0938624	0.0853176	0.0668195	0.100116	0.0739434	1.59185	0.0834475	0.0650869	0.0822653	0.0804513	0.0681925	0.0709731	0.0577256
BRDK71935468	0.0438139	0.128044	0.0456455	0.0697208	0.0414962	0.0545208	0.00716325	0.0429712	0.0566322	0.0340451	0.0177377	0.0567498	0.115863	0.0369864	0.00690404	0.0218419	0.0118628	0.0192145	0.0320932	0.0666809	0.0539113	0.0540848	0.0449039	0.0422613	0.0239258	0.0201903	0.0125454	0.0129015	0.0247952	0.152965	0.0220529	0.0621119	0.052683	0.0686807	0.0398493	0.0188432	0.025857	0.0489487	0.0370308	0.045393	0.0441586	0.0834475	2.3998	0.0385304	0.0349535	1.06813	0.0587625	0.159998	0.0321781
BRDK86535717	0.0717143	0.0316116	0.0646776	0.0529772	0.0717221	0.0577976	0.0472707	0.0516033	0.066163	0.0482023	0.0293399	0.0801115	0.0399488	0.0755633	0.0381445	0.0248813	0.0262312	0.0676093	0.0783242	0.0363352	0.0638442	0.0691082	0.0396271	0.0413402	0.0501538	0.0491054	0.0419822	0.0372391	0.0380906	0.0373126	0.0573804	0.0810394	0.112523	0.0994455	0.0590662	0.063415	0.0361658	0.082316	0.0687208	0.0940612	0.0715311	0.0650869	0.0385304	1.29421	0.0325877	0.0383687	0.081921	0.0350848	0.0553486
BRDK88742110	0.0469224	0.0834286	0.0728181	0.114565	0.0379499	0.0784208	0.0469973	0.0556621	0.0470022	0.138835	0.105297	0.0385177	0.0796284	0.0164057	0.0922333	0.15095	0.210223	0.0848144	0.0419112	0.135007	0.0131831	0.0418514	0.116041	0.0579763	0.0451977	0.101707	0.0661243	0.126412	0.122431	0.0863666	0.0570586	0.0812719	0.0508128	0.0605165	0.0668366	0.0736508	0.100881	0.0298001	0.0229475	0.0536745	0.0757483	0.0822653	0.0349535	0.0325877	2.5055	0.0531218	0.057543	0.057223	0.0389375
BRDK94991378	0.0440721	0.0930358	0.0621297	0.0825853	0.0609098	0.0600243	0.0076144	0.0383409	0.0710094	0.041112	0.0235838	0.052264	0.0841419	0.0290021	0.0109261	0.0289366	0.0212161	0.0217135	0.0388027	0.0726326	0.0521667	0.0494016	0.0694108	0.0378434	0.03065	0.036156	0.0151239	0.0211323	0.024544	0.202212	0.0284589	0.0693037	0.0437312	0.0697025	0.0439839	0.0251737	0.0272022	0.0545805	0.0337931	0.0499881	0.0598	0.0804513	1.06813	0.0383687	0.0531218	2.35686	0.0563158	0.0707936	0.0404032
BRDK96431673	0.0822159	0.0470238	0.0686034	0.0509577	0.0910197	0.058734	0.0526769	0.0561656	0.0673234	0.0584566	0.050171	0.065441	0.0581867	0.0721277	0.0509776	0.0415649	0.0460588	0.0775624	0.100197	0.0469219	0.054118	0.0647005	0.0569802	0.0523255	0.0558926	0.0670986	0.0524747	0.048104	0.0626634	0.060006	0.0608057	0.0793019	0.118636	0.0930389	0.0785911	0.0519141	0.059552	0.0770013	0.0703573	0.075768	0.0760817	0.0681925	0.0587625	0.081921	0.057543	0.0563158	1.38193	0.0632815	0.0640366
BREFELDINA	0.0456476	0.463805	0.0276205	0.0738634	0.043481	0.0671878	0.0174626	0.0587659	0.0462588	0.0693055	0.0234722	0.0511876	0.13138	0.0422407	0.0202813	0.0391244	0.0409102	0.0232359	0.0344117	0.134264	0.0361615	0.0668535	0.0304115	0.0706802	0.0261289	0.0231683	0.0182857	0.0564688	0.135573	0.108989	0.03553	0.0438126	0.0447677	0.0441906	0.0570365	0.0370957	0.0464102	0.0337691	0.0427716	0.0808153	0.0302424	0.0709731	0.159998	0.0350848	0.057223	0.0707936	0.0632815	2.28812	0.0542413
BRIVANIB	0.103821	0.048467	0.0350173	0.0563581	0.0571275	0.0803244	0.0440676	0.208341	0.0497339	0.0362608	0.0271846	0.0874296	0.0480619	0.0443085	0.0370178	0.0333144	0.0333148	0.0409749	0.108102	0.0628946	0.0827923	0.0822856	0.0441445	0.0574304	0.0384002	0.0388458	0.0334453	0.109018	0.0339083	0.0521092	0.0383906	0.0328936	0.0785446	0.0600333	0.0743941	0.0496692	0.045264	0.0595595	0.0878105	0.0590117	0.0314462	0.0577256	0.0321781	0.0553486	0.0389375	0.0404032	0.0640366	0.0542413	1.59899
CANERTINIB	0.0345312	0.0563079	0.089301	0.175458	0.0536782	0.0380173	0.0366369	0.0368416	0.0591448	0.157661	0.211934	0.0333506	0.0547372	0.00762017	0.127064	0.297275	0.225769	0.0724932	0.042576	0.0971497	0.012965	0.0420799	0.114961	0.0435256	0.0882079	0.120419	0.092242	0.0835868	0.0817385	0.11709	0.086337	0.0458104	0.0365488	0.0388646	0.0428954	0.108711	0.0686924	0.0234035	0.020555	0.0467331	0.0729276	0.0690135	0.0489602	0.0326308	0.330817	0.0744159	0.050192	0.0448853	0.0466948
CAY10594	0.0247267	0.362511	0.0458244	0.129	0.0369148	0.0602232	0.0130988	0.0324532	0.0229604	0.059277	0.0164031	0.0423837	0.0505429	0.02472	0.0180119	0.0543566	0.042643	0.0302285	0.063226	0.244841	0.0276452	0.0480006	0.0817332	0.0706142	0.0167553	0.043588	0.0133814	0.0482133	0.0881386	0.0643297	0.0175754	0.0853113	0.050316	0.0491883	0.0441382	0.0204889	0.0204588	0.0537704	0.0321624	0.0862357	0.0498007	0.120375	0.144767	0.0282134	0.0613422	0.117557	0.0481578	0.382506	0.0413263
CAY10618	0.0230249	0.13852	0.0692245	0.0877276	0.0378392	0.0598792	0.0197841	0.0216304	0.0355014	0.0489726	0.0248839	0.0378048	0.0792487	0.0243557	0.0189398	0.171658	0.0285602	0.0457831	0.0368014	0.0777811	0.023347	0.0625428	0.0571636	0.336697	0.0223601	0.0678682	0.0387281	0.0245854	0.0817662	0.0551653	0.0252732	0.072836	0.0394327	0.0367837	0.0397833	0.0221956	0.032435	0.0376824	0.0301148	0.0499517	0.0626502	0.0706955	0.190458	0.0291365	0.0493269	0.152333	0.0443025	0.110359	0.0277115
CCT036477	0.0545138	0.0343646	0.0333906	0.0575381	0.0530704	0.0680922	0.0118445	0.0500159	0.0535438	0.0174585	0.00517968	0.0774568	0.0589186	0.144248	0.00749302	0.00659113	0.00905599	0.0321933	0.0524882	0.0259298	0.128139	0.065271	0.0226001	0.0336936	0.01533	0.0315988	0.009398	0.0205496	0.0224383	0.0296438	0.018562	0.0718291	0.0612683	0.0678258	0.0571814	0.0185691	0.03072	0.0789808	0.140305	0.0565091	0.0350376	0.055868	0.0661517	0.0811128	0.020122	0.0616562	0.05311	0.0373103	0.0426182
CD1530	0.0380703	0.157188	0.0288941	0.0627938	0.0459924	0.0838941	0.0110802	0.0715411	0.0324746	0.0494004	0.0263099	0.0479882	0.159294	0.0249214	0.0152375	0.0380862	0.021572	0.0448504	0.028668	0.269269	0.0230032	0.0346447	0.0410976	0.101711	0.0249436	0.0235753	0.0173281	0.0425553	0.0492589	0.0938827	0.0277008	0.0796249	0.0422477	0.0468286	0.0385697	0.0244629	0.0225136	0.035466	0.0250624	0.0476235	0.0596723	0.0573882	0.29608	0.0326789	0.0717331	0.282052	0.0542641	0.135449	0.03804
CD437	0.0347196	0.0887376	0.0210774	0.0263434	0.0488182	0.0516706	0.0091969	0.0813971	0.0488696	0.0440795	0.0197557	0.0327936	0.113788	0.019413	0.0207046	0.0197255	0.0179107	0.0299548	0.0388913	0.371827	0.0288626	0.0397261	0.0618084	0.0776706	0.0238218	0.0134225	0.022477	0.0927204	0.0258701	0.0653813	0.0229299	0.0691763	0.0375924	0.035909	0.0368196	0.0214324	0.0192801	0.043243	0.0340366	0.0524663	0.0513521	0.054353	0.102607	0.0372918	0.0471107	0.100686	0.0460663	0.0884109	0.0533979
CEDIRANIB	0.0327309	0.0546302	0.0454737	0.0929799	0.0320038	0.0716766	0.028058	0.0601314	0.0286513	0.056876	0.0246176	0.111287	0.0369152	0.04676	0.0284564	0.0277581	0.0976197	0.0496829	0.106324	0.070437	0.0606262	0.0469226	0.127182	0.0451004	0.0199014	0.0328012	0.0184372	0.0651714	0.0535236	0.0594897	0.0205847	0.105926	0.0640244	0.113401	0.0696878	0.0427376	0.0381296	0.0820512	0.0509308	0.0732305	0.0539853	0.122849	0.0620013	0.0486417	0.0637745	0.0718493	0.0801388	0.0444893	0.0567138
CERULENIN	0.0613302	0.0612289	0.0194047	0.0936135	0.0347076	0.0964191	0.00839307	0.115003	0.0638722	0.0322431	0.013391	0.0633571	0.0588726	0.0612398	0.0106619	0.0105204	0.0179492	0.0152514	0.0256734	0.0642662	0.152208	0.0967521	0.0544376	0.0483436	0.0233409	0.0108155	0.0105449	0.0448095	0.0425915	0.100791	0.0182823	0.0566409	0.0517385	0.04863	0.0512374	0.0216056	0.0331551	0.066178	0.0676521	0.0407196	0.0213677	0.0639732	0.214372	0.0364441	0.0323021	0.165727	0.0417105	0.0826609	0.0552011
CHIR99021	0.0830023	0.0302029	0.0333506	0.036502	0.0423848	0.0491878	0.0106899	0.0415192	0.028301	0.00961984	0.00519827	0.0701801	0.0386644	0.14614	0.00343557	0.00569703	0.00397396	0.0243115	0.044873	0.0171538	0.100857	0.0659552	0.0132871	0.0209404	0.0128835	0.0232219	0.00851839	0.00760178	0.00932894	0.0220861	0.0196166	0.0347948	0.0712326	0.067421	0.0425413	0.0125715	0.0316183	0.10995	0.106595	0.0650935	0.0166145	0.0471328	0.0287383	0.0778947	0.012509	0.0287702	0.0537467	0.0244153	0.0427554
CHLORAMBUCIL	0.0658365	0.0361682	0.0564001	0.0937497	0.0602806	0.0693963	0.0256395	0.0362548	0.0497051	0.0389922	0.0178519	0.0916892	0.0536062	0.111588	0.0258465	0.0290166	0.0287363	0.0526517	0.0686935	0.0243619	0.0703625	0.0811248	0.042468	0.0477563	0.0337102	0.0855168	0.0242375	0.0338828	0.0470728	0.0288453	0.0413689	0.0537195	0.0782435	0.0659699	0.0713598	0.0483666	0.0735219	0.0680551	0.0936571	0.0607973	0.0401789	0.0603151	0.0374743	0.0873087	0.0434461	0.0350363	0.064084	0.0392143	0.0491619
CI976	0.0244376	0.114155	0.147673	0.0682214	0.0471387	0.0463427	0.0279429	0.01665	0.0384128	0.0523488	0.048704	0.0353308	0.114822	0.0154693	0.0402372	0.222949	0.0370986	0.117268	0.0484184	0.0564953	0.0165725	0.0364998	0.0331275	0.15835	0.0435921	0.160578	0.045069	0.0413095	0.106014	0.0507839	0.0375646	0.0943569	0.0480315	0.0429228	0.031704	0.0329695	0.0250741	0.0253357	0.030069	0.040828	0.0970886	0.0405872	0.1258	0.044261	0.0780081	0.106248	0.0618716	0.0925776	0.0277763
CICLOPIROX	0.0501118	0.0371957	0.0417457	0.0452472	0.0457403	0.0641977	0.0140533	0.0406122	0.0296992	0.0164564	0.00877508	0.0615237	0.0538742	0.0950371	0.0125206	0.0158575	0.0104679	0.040858	0.0801379	0.0504217	0.0563705	0.053416	0.0316752	0.0616987	0.0166967	0.0354656	0.0148447	0.0234378	0.0242236	0.0497589	0.0213379	0.0731491	0.0714388	0.0612825	0.0476066	0.0159705	0.0200588	0.0800054	0.0846765	0.0593974	0.0434723	0.0593348	0.0583193	0.0663759	0.032028	0.0565954	0.0897985	0.0465046	0.0514451
CIMETIDINE	0.102259	0.0490417	0.0533088	0.0576458	0.0544901	0.0694692	0.0440218	0.0577469	0.0484756	0.0384172	0.0458236	0.120673	0.0479216	0.0562877	0.0426719	0.0527332	0.0335048	0.0573475	0.0656031	0.0307687	0.0657187	0.0695623	0.0395597	0.0677648	0.0362462	0.048445	0.0430337	0.0424876	0.0458016	0.0517419	0.0445492	0.0482711	0.0818816	0.0791585	0.0699804	0.0716227	0.0759074	0.0594294	0.0848454	0.0657259	0.0644463	0.0487625	0.0463022	0.089564	0.0410238	0.0455922	0.0584807	0.0394673	0.0629885
CLOFARABINE	0.0606179	0.0520028	0.0384384	0.0219876	0.0592005	0.0627908	0.0306235	0.0860135	0.0625063	0.0394388	0.0801027	0.0367717	0.0832658	0.0184013	0.0313629	0.0464605	0.0258875	0.0384452	0.0370922	0.094979	0.0450516	0.0579147	0.0654248	0.0895997	0.063665	0.0209523	0.0747721	0.0454502	0.0208627	0.0842652	0.0424062	0.0609344	0.0462329	0.0486288	0.0500929	0.0335519	0.0444813	0.0502769	0.0332477	0.0362303	0.0576322	0.0510052	0.0689392	0.0396574	0.0640766	0.0697336	0.056504	0.0436002	0.0766269
COL3	0.0303022	0.186278	0.0485488	0.0649596	0.0396076	0.0616206	0.0203931	0.0212759	0.0333413	0.0829069	0.104775	0.0274441	0.210603	0.0152151	0.0603757	0.225528	0.0798282	0.0828645	0.0287999	0.207489	0.0134491	0.0367722	0.0396272	0.169458	0.0408569	0.0395849	0.0393795	0.0927939	0.188124	0.0778209	0.0365527	0.0913012	0.0372033	0.0366172	0.0360783	0.0388965	0.0303616	0.0227494	0.0187845	0.0445389	0.0576658	0.040686	0.0879387	0.0260411	0.0935503	0.0672584	0.0488204	0.214018	0.0264818
CRIZOTINIB	0.0324465	0.0485576	0.0779956	0.0653227	0.058263	0.033632	0.0324272	0.0207523	0.0627401	0.310998	0.467054	0.0277193	0.0728516	0.0070033	0.348149	0.251304	0.390512	0.0612016	0.0434186	0.120303	0.00995178	0.0333425	0.128065	0.0368362	0.106471	0.0711059	0.171975	0.121552	0.101466	0.0749565	0.0791634	0.0566333	0.0396132	0.0441337	0.0520088	0.115809	0.0522433	0.0221628	0.0174598	0.0509012	0.0625923	0.0518338	0.0323775	0.0330944	0.148687	0.0414709	0.0632676	0.0458645	0.0294355
CUCURBITACINI	0.0365753	0.0751127	0.0267923	0.105721	0.0369742	0.0646969	0.00567069	0.060111	0.0458625	0.0464489	0.0278409	0.0428514	0.177094	0.0167174	0.0160991	0.0341568	0.0246402	0.0293537	0.0379043	0.230805	0.0263742	0.0348635	0.0375801	0.0428448	0.0266811	0.0211427	0.0120235	0.0542985	0.0564701	0.197321	0.0244938	0.0560933	0.04199	0.0403953	0.0276258	0.0260273	0.0224023	0.0370509	0.023762	0.0337755	0.0311191	0.0504461	0.245798	0.0275352	0.0660908	0.24941	0.0400086	0.081686	0.0387381
CURCUMIN	0.049525	0.0408797	0.069415	0.0620438	0.0578471	0.0497107	0.115097	0.0422103	0.0627849	0.113067	0.613696	0.0542485	0.0461096	0.00915296	0.118154	0.253773	0.225875	0.0689488	0.019663	0.0383633	0.0163271	0.0439193	0.0723854	0.0546888	0.123828	0.0495783	0.181756	0.0495945	0.0467417	0.0899294	0.117936	0.0295725	0.0333087	0.0680516	0.0638931	0.148097	0.146897	0.0224439	0.0176893	0.0324794	0.0691869	0.0582684	0.030271	0.0340121	0.13424	0.0413914	0.051947	0.027642	0.0341581
CYANOQUINOLINE11	0.0731204	0.0819377	0.100571	0.0844365	0.049686	0.0602279	0.0911767	0.0603802	0.0772784	0.0405037	0.0725765	0.0844883	0.0520619	0.0353422	0.041195	0.0772607	0.0822438	0.0625594	0.0308896	0.0184904	0.0733564	0.0794639	0.0688605	0.0646136	0.0792708	0.0617622	0.0621912	0.0638131	0.0633367	0.101347	0.0639577	0.0841109	0.0535637	0.108056	0.0660581	0.0469479	0.0761554	0.0475885	0.0421505	0.0427275	0.0593866	0.0763889	0.135115	0.0425616	0.0732579	0.149108	0.068652	0.0567016	0.0450751
CYCLOPHOSPHAMIDE	0.0608822	0.0442393	0.0319537	0.0515068	0.0289362	0.0568244	0.0151642	0.0429537	0.0429569	0.0160219	0.00619067	0.0630945	0.039077	0.194418	0.00737863	0.00722533	0.00868884	0.0180639	0.0264999	0.0124268	0.137887	0.109732	0.0194957	0.0281996	0.0128429	0.0277205	0.00928396	0.0165934	0.0255469	0.0261804	0.0179657	0.0361669	0.0572868	0.0631834	0.0485744	0.0167527	0.0563527	0.0720246	0.0831407	0.0514118	0.0183733	0.0451099	0.041736	0.0726188	0.0148193	0.0337198	0.0560565	0.045898	0.0349202
CYTOCHALASINB	0.0431641	0.109247	0.0599804	0.0909881	0.0375797	0.0786768	0.0458299	0.0371525	0.0434128	0.175523	0.113137	0.0339171	0.0868663	0.0180038	0.162	0.302	0.237536	0.0910901	0.0252464	0.185739	0.0141258	0.0394007	0.0697112	0.137505	0.0533112	0.0632201	0.057203	0.133578	0.496846	0.0613327	0.0427267	0.0841848	0.0425572	0.049557	0.041274	0.0582513	0.0549779	0.0269263	0.0225827	0.0460408	0.0922654	0.0480136	0.0407461	0.0297165	0.194562	0.0333271	0.0476425	0.0978768	0.0284006
DABRAFENIB	0.0860999	0.015181	0.0583911	0.0265401	0.0892622	0.0378726	0.0524659	0.0706123	0.0966726	0.0346716	0.0302319	0.0725034	0.0226028	0.0719287	0.0271047	0.0180484	0.019147	0.0411306	0.070061	0.0167232	0.0964521	0.0826313	0.0358668	0.0232488	0.0803978	0.0508391	0.0432065	0.0231892	0.0107471	0.0272169	0.0754392	0.0398385	0.0698634	0.088511	0.0739883	0.0394969	0.067524	0.0991123	0.08263	0.0632514	0.0406699	0.0526498	0.0207306	0.117296	0.0259597	0.0261707	0.0774699	0.0161764	0.0696774
DACARBAZINE	0.0795327	0.0452629	0.0696394	0.0626289	0.0936689	0.07204	0.0534338	0.0525829	0.0817136	0.045387	0.0380395	0.0879067	0.0493405	0.0700281	0.054129	0.0399909	0.0419542	0.0611055	0.068115	0.0351254	0.0680519	0.0763962	0.0560113	0.0582535	0.0570188	0.0722676	0.0594489	0.0393774	0.0451256	0.058635	0.0637155	0.0650334	0.0770049	0.0759041	0.0667827	0.0515072	0.0694789	0.0842654	0.108063	0.0645583	0.0632521	0.0601958	0.0446029	0.0925396	0.0385891	0.0542269	0.0933226	0.0487861	0.0606743
DARINAPARSIN	0.0709538	0.0174446	0.0131064	0.0308405	0.0590202	0.0469807	0.0385626	0.0356673	0.0387224	0.0517198	0.100396	0.0625705	0.0121774	0.011483	0.0922692	0.217843	0.0605597	0.0388584	0.0362754	0.0203602	0.0140123	0.0576696	0.0328497	0.0886864	0.0605882	0.0255442	0.059378	0.0564368	0.0735666	0.0924841	0.0533942	0.015035	0.0543431	0.0536773	0.0748934	0.13548	0.0572589	0.0372175	0.0191147	0.0452347	0.0624827	0.0427578	0.0112566	0.0388838	0.0377337	0.014768	0.0516496	0.030222	0.0864026
DASATINIB	0.0446339	0.0522415	0.0673306	0.0726682	0.0651995	0.0323239	0.0789485	0.0471161	0.0589912	0.0452837	0.0945168	0.0760811	0.0425943	0.02221	0.0737156	0.106341	0.162315	0.0634169	0.0782956	0.030972	0.0429867	0.0527398	0.0459853	0.0464557	0.0702724	0.050575	0.0632309	0.0803583	0.056394	0.0922365	0.0769492	0.0455926	0.0507403	0.0724443	0.0674853	0.101939	0.0712206	0.0533627	0.0347596	0.0850482	0.0573256	0.0571254	0.0310197	0.0549078	0.0718714	0.0395756	0.0592608	0.0644602	0.0687666
DECITABINE	0.0697067	0.0440031	0.105332	0.0642062	0.130366	0.0471116	0.0318709	0.0483321	0.191672	0.0365952	0.0412702	0.0505376	0.0580302	0.053457	0.0228025	0.0438204	0.0353868	0.0313066	0.0396726	0.0228085	0.0920692	0.0979916	0.0637491	0.0369509	0.0637095	0.069691	0.0467072	0.0222353	0.0402944	0.0524279	0.0622349	0.0582028	0.0589303	0.0652172	0.0888314	0.047682	0.0845086	0.0743815	0.0762895	0.0601974	0.0563111	0.072178	0.0630182	0.0785637	0.0502565	0.0826751	0.0635922	0.0428452	0.0509497
DEXAMETHASONE	0.0670071	0.0420325	0.108488	0.0851699	0.0369728	0.0489442	0.0398629	0.0364549	0.0671988	0.039468	0.024373	0.0490311	0.0498754	0.07258	0.0233948	0.0282874	0.0266245	0.0328378	0.0341863	0.0144179	0.0805969	0.0990277	0.0352252	0.0343836	0.0402745	0.0982197	0.028803	0.0262542	0.044783	0.032706	0.0488768	0.0403271	0.0555333	0.072476	0.0581967	0.0449364	0.0989104	0.0580175	0.0673489	0.0553458	0.0308512	0.0505543	0.0372324	0.0804424	0.0387658	0.0333199	0.060103	0.04369	0.0346432
DOCETAXEL	0.0908935	0.0370021	0.0194033	0.0379808	0.0525608	0.0799529	0.0152059	0.0779169	0.0434463	0.0215189	0.00562291	0.100788	0.0296621	0.109766	0.0135435	0.00727335	0.00918239	0.0230739	0.0687886	0.0402479	0.093328	0.0787798	0.0198569	0.0338938	0.0164174	0.0164501	0.00959501	0.0332305	0.0277471	0.0274021	0.0214486	0.0708067	0.0790001	0.0650908	0.0447012	0.0171823	0.0223376	0.0838924	0.0966839	0.0621143	0.0340924	0.0456341	0.0364874	0.0866814	0.0179496	0.035133	0.0618213	0.0399947	0.0705371
DOXORUBICIN	0.0387352	0.0268242	0.057894	0.0303976	0.0425731	0.0169278	1.29295	0.0461116	0.0667322	0.0452503	0.147414	0.0312581	0.0137162	0.00869569	0.0657218	0.0676566	0.0945088	0.0355937	0.0276662	0.00876289	0.0248929	0.0535308	0.0545295	0.0262099	0.124228	0.055786	0.493958	0.0406829	0.0205525	0.0287848	0.0988925	0.0216861	0.0280091	0.0505294	0.0584366	0.064987	0.0867983	0.0247492	0.0203585	0.0402774	0.0323407	0.0332945	0.00716335	0.0372317	0.0574816	0.00804886	0.0449962	0.0177647	0.0430553
ENTINOSTAT	0.0410681	0.0506335	0.0555677	0.0448086	0.0689642	0.0561289	0.0652421	0.0273276	0.063688	0.112545	0.100945	0.0397413	0.0489806	0.012132	0.130771	0.0871908	0.134617	0.0543023	0.0425153	0.0682694	0.019723	0.0299761	0.459667	0.0537872	0.0671714	0.0793369	0.157114	0.0873902	0.0572956	0.0659972	0.0502067	0.0739203	0.0431428	0.0506693	0.0496021	0.0687413	0.040573	0.0291588	0.0231522	0.0501728	0.18963	0.0453175	0.0271321	0.0444859	0.154951	0.0499363	0.0600352	0.0226493	0.0350024
ERASTIN	0.0423339	0.130954	0.057799	0.10457	0.0306778	0.0492274	0.0190598	0.0277198	0.0345657	0.0475547	0.0329875	0.0406263	0.115472	0.0309802	0.0331536	0.0574995	0.0337829	0.0750638	0.0516139	0.078071	0.0269416	0.0413865	0.0360691	0.0899747	0.0288207	0.0459615	0.0235425	0.0478654	0.0942672	0.0661632	0.0300443	0.106345	0.052046	0.0400998	0.039265	0.0278063	0.0253339	0.0384909	0.0344336	0.0609119	0.0637275	0.0598889	0.126124	0.0474005	0.071279	0.0970613	0.0675638	0.112406	0.0321321
ERISMODEGIB	0.0263805	0.0328798	0.0779258	0.051567	0.0748371	0.0168461	0.109757	0.033636	0.0492261	0.11832	0.319692	0.0360689	0.0246631	0.00461235	0.271631	0.317982	0.188403	0.0813874	0.0724912	0.0561718	0.00775487	0.022647	0.0590743	0.0368646	0.131928	0.11288	0.174738	0.147025	0.0531688	0.0513365	0.12558	0.0350363	0.0462466	0.0429585	0.0487435	0.143904	0.0469032	0.0211988	0.0156013	0.0601023	0.119868	0.045318	0.0129871	0.0388747	0.16033	0.0206342	0.0602948	0.02543	0.057216
ERLOTINIB	0.0558567	0.089461	0.0679436	0.0634636	0.0569795	0.040685	0.108733	0.0832263	0.0695839	0.133751	0.308881	0.0293835	0.0630022	0.00826607	0.138161	0.173068	0.184947	0.0818101	0.0255333	0.077125	0.0145493	0.0464487	0.0541194	0.0290275	0.12312	0.0611773	0.110293	0.0867997	0.0923819	0.0763004	0.144328	0.0410289	0.0346993	0.0426304	0.0414364	0.0940593	0.0865451	0.0265899	0.0235417	0.0513238	0.0501463	0.0412564	0.0221798	0.0353939	0.213052	0.0252943	0.0520187	0.0576365	0.0550232
ETOMOXIR	0.0547979	0.0693135	0.065491	0.0646071	0.0551462	0.0830322	0.0732825	0.0392553	0.0407188	0.0538959	0.0566169	0.0718677	0.0491318	0.0328364	0.0522556	0.0575003	0.0623733	0.148503	0.0634325	0.0529638	0.0271764	0.0357241	0.063729	0.0696963	0.053459	0.0847204	0.0563367	0.0518874	0.0640179	0.0496438	0.0539176	0.15867	0.0633949	0.112972	0.0382164	0.0329476	0.0318492	0.0475784	0.0356377	0.0424067	0.116665	0.0573211	0.0452675	0.0559464	0.0863875	0.0640551	0.0792496	0.0310814	0.0373507
ETOPOSIDE	0.0503129	0.0402996	0.122347	0.0462909	0.0549362	0.026364	0.13427	0.0425314	0.101785	0.0772072	0.263343	0.0369218	0.0500328	0.0163827	0.0842456	0.0943241	0.0877002	0.0610069	0.0232955	0.0164468	0.0324895	0.0511459	0.0641268	0.0374261	0.183866	0.0748291	0.146687	0.0375292	0.032004	0.034698	0.16975	0.0488065	0.0394673	0.0628432	0.0709332	0.112204	0.134119	0.0326604	0.0204477	0.0426269	0.0570344	0.0539935	0.0208219	0.0498942	0.0862832	0.0271231	0.0514934	0.0270866	0.0283244
EX527	0.0814971	0.0772681	0.063246	0.0593355	0.0630528	0.0522084	0.0640798	0.146245	0.102376	0.0574054	0.0880762	0.0616429	0.0418307	0.0315981	0.0410918	0.0652874	0.0508271	0.0356856	0.0300837	0.0375727	0.0904938	0.113465	0.0621649	0.0495931	0.102066	0.0354065	0.0681721	0.0432357	0.0509058	0.0851789	0.0828251	0.0418037	0.0537939	0.0723843	0.0594661	0.0674791	0.106544	0.0490461	0.0587473	0.0559009	0.0399477	0.0476003	0.0608989	0.0559677	0.0520826	0.0507635	0.0508966	0.0842633	0.0839419
FGIN127	0.0783241	0.0391756	0.0133314	0.0508045	0.0516327	0.10133	0.0150062	0.0480541	0.0367195	0.045361	0.0116373	0.0928019	0.0395157	0.0990468	0.0252094	0.0241808	0.0196711	0.0452647	0.0532352	0.0755533	0.04	0.0550866	0.0329842	0.128657	0.0182342	0.0158332	0.0152759	0.0505166	0.116454	0.0506079	0.0259913	0.0732792	0.100592	0.0913433	0.0630729	0.0338661	0.0232671	0.097313	0.0551459	0.0602356	0.0593041	0.0672581	0.0459172	0.0722357	0.0347303	0.0385969	0.090677	0.0847509	0.0628246
FLUOROURACIL	0.0483331	0.0290763	0.163198	0.0674101	0.0433923	0.0394202	0.0254618	0.0216863	0.0496349	0.0277358	0.0200035	0.0381674	0.0849766	0.0581967	0.0206968	0.0251721	0.0232186	0.055043	0.0694783	0.0138279	0.0616355	0.0716501	0.0270816	0.0235224	0.0428257	0.199537	0.0293446	0.0218165	0.0203997	0.0172825	0.0365361	0.049719	0.0668802	0.0559221	0.0561532	0.0411391	0.0495254	0.0443213	0.069984	0.0557798	0.037121	0.0487067	0.0368189	0.0687501	0.0350467	0.0431238	0.0609285	0.0230121	0.0354041
FLUVASTATIN	0.0631871	0.042514	0.0759839	0.0565414	0.154307	0.0515582	0.063437	0.0419881	0.0907603	0.0691393	0.107965	0.0476019	0.0305078	0.0252074	0.0589934	0.0876614	0.0663332	0.0468352	0.056222	0.0270804	0.0433038	0.0826679	0.0682121	0.0438731	0.146387	0.0728784	0.0777244	0.0468942	0.050054	0.0611616	0.079682	0.0464212	0.0854286	0.071118	0.0863007	0.063077	0.084801	0.0661427	0.052524	0.0634086	0.0531273	0.0751558	0.0349834	0.0573724	0.0470036	0.0474441	0.0885699	0.0355297	0.0579848
FORETINIB	0.0347853	0.048984	0.100133	0.197224	0.0431444	0.0458856	0.0678501	0.0297252	0.0532719	0.126342	0.0852701	0.0349681	0.0408915	0.0211226	0.122752	0.104955	0.430797	0.0785315	0.0450672	0.0313723	0.029294	0.0560385	0.104111	0.0475174	0.0575754	0.148493	0.0651772	0.154893	0.156814	0.0436304	0.0565022	0.0594515	0.0432029	0.0507358	0.0632328	0.0719726	0.0721364	0.030646	0.0355989	0.0605764	0.0409316	0.0720418	0.0220243	0.0362819	0.144337	0.0298571	0.0462877	0.0545921	0.0404713
FULVESTRANT	0.0778796	0.041283	0.103317	0.0778439	0.0602049	0.0763577	0.0378661	0.0333124	0.0532398	0.0461891	0.0281009	0.0829881	0.046224	0.0928371	0.0311057	0.0379579	0.0348398	0.0578432	0.082116	0.0298029	0.0627835	0.0821654	0.0623436	0.0630955	0.0340548	0.0893789	0.0389137	0.0317304	0.0545717	0.0518613	0.0473173	0.0657372	0.0861947	0.0913782	0.0668719	0.036884	0.0597713	0.0790904	0.0794251	0.0674945	0.0560302	0.0831866	0.0688841	0.0775103	0.0490193	0.0697838	0.124254	0.051756	0.0436625
FUMONISINB1	0.0488631	0.0136925	0.0342026	0.0368466	0.0467135	0.017229	0.0566176	0.0266016	0.0708707	0.0806607	0.206555	0.038437	0.0156353	0.00680239	0.117662	0.241099	0.0759232	0.0296434	0.0237423	0.0109561	0.0147389	0.0462841	0.0382903	0.0458404	0.129096	0.0403863	0.123287	0.0534669	0.0588511	0.0591831	0.0751966	0.0147797	0.041194	0.0433864	0.0635057	0.167572	0.100999	0.0194151	0.0196322	0.0379129	0.0393959	0.0362935	0.00923438	0.0376027	0.0466986	0.00990687	0.0539884	0.0296809	0.0528012
GANT61	0.059173	0.0742344	0.0763832	0.0766501	0.0500992	0.0488605	0.0325354	0.0517264	0.0583155	0.0899479	0.0844476	0.0824137	0.0798462	0.0260735	0.0357845	0.0832241	0.0890551	0.0289435	0.0479887	0.0476528	0.052215	0.0835699	0.0906716	0.0326008	0.0512428	0.0488917	0.0521438	0.0386446	0.0411537	0.0809395	0.0474279	0.0358989	0.0540272	0.0717163	0.102456	0.0862729	0.143576	0.0720069	0.0404205	0.0809901	0.0428197	0.104571	0.0811645	0.0491044	0.0998962	0.0718978	0.0585156	0.0614784	0.0457063
GDC0879	0.0524157	0.0767066	0.0627469	0.0906805	0.0760739	0.0405963	0.0553394	0.0440278	0.0712245	0.0441913	0.0396821	0.10059	0.0593733	0.0388559	0.0411529	0.0333727	0.0614823	0.0670338	0.0865394	0.0553835	0.0561814	0.0433723	0.0712162	0.0503213	0.0643263	0.062662	0.0384226	0.0879247	0.0387427	0.0922942	0.0672702	0.0704878	0.0665171	0.068807	0.0626241	0.040122	0.0348125	0.0602239	0.0464726	0.0772869	0.0571664	0.076771	0.0853509	0.0560995	0.0527779	0.149308	0.0835608	0.0656987	0.0776234
GDC0941	0.0326981	0.0341337	0.0597189	0.0567604	0.0437384	0.0397588	0.0684607	0.0189121	0.0351602	0.279249	0.426836	0.0227902	0.0307769	0.00573186	0.632368	0.335151	0.595673	0.150886	0.0262267	0.0520111	0.00772694	0.0345617	0.105831	0.0427255	0.0973374	0.0637297	0.128767	0.129302	0.137385	0.0407799	0.0637658	0.0480754	0.0342358	0.0356138	0.0487745	0.100936	0.0790375	0.0185957	0.0131558	0.0388552	0.0670132	0.039405	0.00849873	0.0240763	0.130585	0.0109121	0.0424911	0.0200718	0.0240942
GEFITINIB	0.033238	0.117051	0.104025	0.0911803	0.0473389	0.0536859	0.0641605	0.0391437	0.0303058	0.0949308	0.139664	0.0461156	0.0677307	0.00781996	0.152962	0.159348	0.234005	0.124572	0.0671505	0.0869145	0.0121585	0.0305847	0.0832216	0.0410045	0.0752752	0.12693	0.0935725	0.128256	0.0882447	0.0439682	0.0768375	0.0831084	0.048203	0.0558163	0.0475609	0.0689824	0.058071	0.0236186	0.0231683	0.0610254	0.0903688	0.0563019	0.0280977	0.0372863	0.191755	0.0490256	0.0450955	0.0446304	0.0520239
GEMCITABINE	0.0642962	0.0333282	0.0526509	0.0390009	0.030476	0.096034	0.0175561	0.0323717	0.0329731	0.0270018	0.009768	0.0594397	0.0502765	0.121766	0.0154143	0.0158545	0.0185349	0.0371624	0.0459502	0.0271021	0.0922994	0.0849288	0.0384643	0.0907714	0.0151949	0.0302404	0.0166296	0.0241234	0.0403272	0.0262017	0.0137324	0.105611	0.0601743	0.0642878	0.0546267	0.0197748	0.0359205	0.0835864	0.0924337	0.0526852	0.0388414	0.0653584	0.0467252	0.0655251	0.0265173	0.0503461	0.0691818	0.0388529	0.0337166
GMX1778	0.0404666	0.0214375	0.03127	0.0322295	0.0762204	0.0239111	0.0417662	0.0301039	0.0576744	0.0351964	0.0219154	0.0649555	0.0169261	0.0264526	0.0842539	0.0309813	0.0249138	0.0540245	0.0922491	0.0342949	0.0227497	0.0335123	0.0239243	0.0421981	0.0478621	0.0432665	0.0467278	0.0528143	0.0306205	0.0410137	0.0517227	0.0513164	0.0726215	0.0640175	0.0424679	0.0538286	0.0172608	0.0402406	0.0474343	0.0863662	0.116107	0.0308583	0.0177512	0.120758	0.0206484	0.0225042	0.0852012	0.0280334	0.054736
GOSSYPOL	0.060333	0.142232	0.063075	0.0874569	0.0353473	0.105818	0.0181196	0.0644042	0.0419345	0.0605774	0.0435072	0.0542969	0.252972	0.0363413	0.0204833	0.040789	0.0486947	0.0478633	0.0339399	0.118382	0.045486	0.0525952	0.063484	0.0641487	0.0302503	0.0294899	0.0274424	0.0450256	0.0766946	0.0777682	0.0239384	0.0931199	0.0508454	0.0598525	0.050639	0.0264529	0.0583321	0.0521498	0.0458134	0.0366773	0.0381348	0.0791763	0.127939	0.0253895	0.10117	0.0998377	0.0462306	0.0952736	0.0362219
GSK1059615	0.0558408	0.0387501	0.029827	0.0509269	0.076308	0.0443148	0.0846626	0.0398551	0.0664136	0.217329	0.361011	0.0267605	0.023105	0.00758351	0.419153	0.172571	0.416804	0.0795561	0.0270625	0.0715388	0.0120996	0.0413303	0.0840333	0.0329922	0.168514	0.0364646	0.112933	0.170687	0.146381	0.115884	0.115097	0.0407319	0.046214	0.043262	0.049877	0.0892401	0.0486157	0.0253681	0.0126776	0.0470499	0.0739398	0.0356936	0.0127328	0.037077	0.0891749	0.0236508	0.0547184	0.0365944	0.0370663
GSK3INHIBITORIX	0.0453435	0.113266	0.0786734	0.0929934	0.0407394	0.0315198	0.0426668	0.0266999	0.0503847	0.0388161	0.0877875	0.0482119	0.118992	0.0205269	0.0279046	0.10718	0.0457031	0.0744878	0.0462198	0.0470489	0.0292197	0.0475923	0.0357332	0.0633051	0.0593876	0.0620775	0.0764523	0.0345644	0.0361635	0.0719761	0.0583237	0.0435163	0.0516142	0.0593923	0.0418869	0.0649768	0.062602	0.0331467	0.0451311	0.0642696	0.0516642	0.047639	0.067649	0.0494635	0.0639828	0.0554351	0.0640798	0.137682	0.050248
GSK461364	0.0396209	0.0921018	0.0388385	0.0825968	0.0450682	0.058884	0.0278191	0.0602626	0.0262422	0.105829	0.0443409	0.067825	0.0540926	0.0158738	0.10026	0.0701806	0.153588	0.0763131	0.121684	0.204879	0.0206774	0.0300409	0.114662	0.0465758	0.0289638	0.0529611	0.027273	0.164626	0.0732288	0.0602485	0.0351909	0.0497771	0.0561273	0.0487638	0.0605724	0.0608918	0.0487915	0.0559487	0.0339951	0.0755778	0.0701795	0.10038	0.0309802	0.0362816	0.125012	0.0408523	0.0624538	0.0683112	0.100283
GW405833	0.0293082	0.188292	0.0422819	0.0725538	0.0253944	0.0927486	0.0084677	0.0243325	0.0245629	0.036731	0.00771416	0.0375188	0.114676	0.0461497	0.0117037	0.0248325	0.0155339	0.0508137	0.0305448	0.144764	0.026716	0.0460461	0.0397598	0.130013	0.0119139	0.0279774	0.00984945	0.0321823	0.101695	0.0319607	0.0119809	0.162939	0.040544	0.0464568	0.0284538	0.0117796	0.0157443	0.039333	0.0384769	0.0482836	0.0463885	0.0561995	0.195892	0.0343111	0.0435165	0.114589	0.0491181	0.123264	0.0228673
GW843682X	0.0613144	0.0464603	0.0232685	0.0498035	0.0721866	0.0450809	0.0306019	0.0669384	0.054506	0.0662753	0.0850831	0.0776796	0.0597207	0.011585	0.104424	0.114778	0.0577355	0.0465864	0.0549982	0.106852	0.0150271	0.0437691	0.0281216	0.0451157	0.0612077	0.0252559	0.0575728	0.093028	0.0543822	0.0904521	0.0820277	0.0249222	0.0506154	0.0432846	0.0628578	0.136906	0.0736894	0.0357664	0.0289448	0.066165	0.0683776	0.0579147	0.0241886	0.0516671	0.0593636	0.0269119	0.04858	0.0633378	0.0979212
HLI373	0.053675	0.020608	0.0176851	0.0204525	0.0488184	0.0331329	0.511594	0.0621129	0.0499479	0.0640516	0.130236	0.0377013	0.0106826	0.00907256	0.153689	0.0929334	0.137404	0.0413501	0.0282523	0.0164574	0.0183019	0.0472604	0.037647	0.0520778	0.111101	0.0301289	0.346389	0.103142	0.0498179	0.0357122	0.0871051	0.0209804	0.0402238	0.0438762	0.0596802	0.0949936	0.0719377	0.0237231	0.0214281	0.0378626	0.0394133	0.0319554	0.00430422	0.0395334	0.0497332	0.00538569	0.0508724	0.0238799	0.0677112
HYPERFORIN	0.0414853	0.131913	0.0388019	0.0692247	0.0602971	0.0467053	0.0152968	0.0448396	0.0506986	0.0450387	0.0259061	0.0325011	0.0856517	0.0301315	0.0285369	0.0372205	0.0254928	0.0361213	0.0664266	0.142343	0.0266914	0.0414924	0.0316905	0.0743505	0.0364189	0.026901	0.022001	0.0435215	0.0959456	0.0722471	0.035589	0.10167	0.055967	0.0464974	0.0330336	0.0175553	0.0173616	0.0403397	0.0380139	0.0574468	0.0705882	0.0633446	0.128212	0.0360958	0.0434193	0.0887462	0.0711503	0.194188	0.0416559
IBRUTINIB	0.0887101	0.0670321	0.0554514	0.0968743	0.0452223	0.079877	0.0701841	0.106942	0.0609703	0.0790208	0.0748519	0.0599784	0.0602999	0.0278071	0.0561718	0.0435399	0.120025	0.0609787	0.0507301	0.0475038	0.0638546	0.0919098	0.0777996	0.0277946	0.069173	0.0624786	0.0432291	0.0902721	0.0497418	0.0589129	0.0598539	0.0491591	0.0635016	0.0820658	0.0713415	0.0664212	0.0834321	0.0682419	0.0618805	0.0527323	0.0289004	0.0647674	0.0352752	0.0494744	0.080807	0.0448962	0.0592237	0.0448251	0.100463
IFOSFAMIDE	0.0507203	0.0396205	0.0854462	0.0604643	0.0548136	0.0457566	0.0721187	0.0467046	0.0744945	0.0875263	0.143341	0.0399908	0.0419957	0.0193025	0.0667178	0.103553	0.0804192	0.0588727	0.0325414	0.0269444	0.0340498	0.0720369	0.0590587	0.0272409	0.0978632	0.0959154	0.0814425	0.0399014	0.0443169	0.0685915	0.0922956	0.0306433	0.0523985	0.0612236	0.0579442	0.0885818	0.136616	0.0451808	0.0397328	0.0446614	0.0399325	0.0551562	0.0288299	0.0531799	0.0827677	0.0346267	0.0662262	0.0313322	0.0570522
IMATINIB	0.0785105	0.0469041	0.0372233	0.0496901	0.0538196	0.0899837	0.0253202	0.0653128	0.0358878	0.0411988	0.0204872	0.0987046	0.0427902	0.0679546	0.016078	0.0291045	0.0165841	0.0435936	0.113989	0.0415176	0.0773229	0.0795036	0.0470782	0.0601942	0.0316028	0.0272059	0.0271346	0.0218434	0.0256683	0.0429398	0.0251357	0.0588797	0.09403	0.0696961	0.0719779	0.0313608	0.0400843	0.106123	0.0854998	0.0623424	0.0433662	0.0953649	0.0556135	0.065891	0.0252663	0.040981	0.0689668	0.043643	0.0713475
IMPORTAZOLE	0.0378037	0.0733845	0.0393653	0.0610478	0.0407176	0.0612565	0.0155371	0.0499815	0.0406867	0.0642258	0.0603982	0.0571031	0.111802	0.0173309	0.0354307	0.0581452	0.0430712	0.0688978	0.0438634	0.146861	0.0239766	0.0355754	0.0894782	0.127523	0.0321264	0.0333763	0.0422001	0.0598997	0.0484064	0.0653095	0.0408076	0.0658401	0.0426659	0.0457313	0.0411569	0.0414746	0.0406787	0.0353126	0.0296615	0.0519726	0.0703192	0.0710145	0.0830163	0.0385752	0.0960983	0.093241	0.0445029	0.0801857	0.0468092
ISOLIQUIRITIGENIN	0.055549	0.0434706	0.031911	0.15177	0.0396331	0.0608218	0.0111164	0.051649	0.0484911	0.042243	0.0284726	0.0551456	0.0463375	0.0293369	0.0162905	0.0380581	0.0247257	0.0271836	0.0299192	0.0549813	0.0451931	0.0749384	0.0620998	0.0475703	0.0310941	0.0308413	0.016477	0.0294943	0.0350785	0.126583	0.0289867	0.0398381	0.0503731	0.0557304	0.0483676	0.03482	0.0484312	0.057339	0.0375101	0.0411106	0.03934	0.0794563	0.202078	0.0367357	0.0906521	0.182186	0.0529581	0.0450817	0.0444685
ISONICOTINOHYDROXAMICACID	0.054849	0.05067	0.078719	0.0625271	0.0694201	0.0828357	0.0590673	0.0517997	0.0689169	0.0572019	0.0336333	0.07642	0.0605858	0.0789805	0.0478693	0.0372197	0.0514429	0.0725864	0.0819882	0.0469798	0.047669	0.0753654	0.0500592	0.0660879	0.0510156	0.0807892	0.0566218	0.0617122	0.0517552	0.0492521	0.0558102	0.0736455	0.104764	0.0923792	0.0847119	0.0573972	0.0567417	0.0724254	0.053491	0.0681468	0.0872404	0.0728587	0.0497192	0.0927042	0.0672852	0.0547139	0.0943425	0.0446696	0.0552541
ISOX	0.0703891	0.0269415	0.0368468	0.0320503	0.070713	0.0658461	0.0119628	0.0570829	0.112375	0.0179487	0.00590596	0.057795	0.0414555	0.117572	0.00853705	0.00738807	0.00777024	0.0217133	0.0623481	0.0225755	0.125982	0.0810177	0.0373207	0.0359882	0.013251	0.0318854	0.0139021	0.0160477	0.0208181	0.030507	0.0137226	0.0628591	0.0586688	0.0752839	0.0477768	0.0174191	0.0313456	0.0952759	0.0919492	0.0562074	0.0316873	0.0365638	0.0652755	0.0800929	0.0168004	0.0697067	0.0652056	0.0403145	0.0612169
ITRACONAZOLE	0.0568039	0.0646908	0.0537309	0.0854345	0.046927	0.0739933	0.0324497	0.0527615	0.0680397	0.147964	0.0493958	0.0755083	0.0511432	0.062675	0.0418666	0.079642	0.0569644	0.0401573	0.0322779	0.066508	0.0465328	0.0811709	0.0674781	0.114378	0.0362476	0.0327102	0.0394732	0.0444794	0.114303	0.0745391	0.0450088	0.0576108	0.0518329	0.0677499	0.0818112	0.0755624	0.0640136	0.0582398	0.0446102	0.0862612	0.0632152	0.0964905	0.0745806	0.0555529	0.0868109	0.0652077	0.0607132	0.100125	0.0418047
KI8751	0.108827	0.0559824	0.0434034	0.0829332	0.0687433	0.0533872	0.0238498	0.0627636	0.0756039	0.0480999	0.0798418	0.082763	0.0530953	0.032487	0.0363459	0.0623877	0.025439	0.0333607	0.0406704	0.0428134	0.0642404	0.0634648	0.0448788	0.0487894	0.0737647	0.0257983	0.0407373	0.022637	0.0242391	0.0776763	0.0642885	0.0565081	0.072582	0.0783741	0.0519456	0.0569997	0.070795	0.0693629	0.0531571	0.065337	0.0637412	0.0584264	0.0988315	0.061819	0.0397603	0.101025	0.0648101	0.0479068	0.0648665
KO143	0.0387985	0.228612	0.0284351	0.0855195	0.0480471	0.0551023	0.0404048	0.0814217	0.0477998	0.0886751	0.143177	0.0452242	0.0851748	0.00895796	0.090267	0.352001	0.138109	0.0550774	0.0358169	0.225036	0.0146324	0.0512683	0.060881	0.207597	0.0538716	0.035155	0.0681362	0.207476	0.26897	0.169817	0.0597052	0.0417407	0.0388922	0.0429402	0.0514983	0.0865089	0.0554496	0.0258512	0.018669	0.0581705	0.0823359	0.0530933	0.0867993	0.027852	0.138593	0.0638889	0.0497473	0.337874	0.0914418
KU0060648	0.0343471	0.0520467	0.0356092	0.0540043	0.0609275	0.054061	0.0370684	0.0659462	0.0554999	0.137535	0.0763447	0.036916	0.047679	0.0103735	0.219505	0.068912	0.250492	0.0616932	0.0460022	0.317492	0.0218099	0.030642	1.07839	0.0387121	0.036383	0.0415389	0.077041	0.292978	0.100688	0.0729515	0.038619	0.0672323	0.0434155	0.0480867	0.0469932	0.0625747	0.0413145	0.0330207	0.0287408	0.0723861	0.0752916	0.0628914	0.0199017	0.0398599	0.205096	0.0363782	0.0566257	0.0328677	0.0561941
KU0063794	0.0414004	0.0327172	0.0740626	0.0443013	0.0465359	0.070672	0.0493067	0.0277306	0.0394296	0.0954517	0.0396366	0.0299015	0.0309873	0.0311756	0.232709	0.0540839	0.110454	0.183162	0.041674	0.0483481	0.0206103	0.0444331	0.0449221	0.055378	0.0361314	0.0571606	0.0355275	0.0913872	0.252811	0.0250071	0.0346309	0.0997122	0.0501303	0.0442877	0.0447313	0.0335613	0.0313921	0.0336967	0.0356162	0.046827	0.0746935	0.0329414	0.0120039	0.0486998	0.0488482	0.0131469	0.0519221	0.0217314	0.0248029
KU55933	0.0375723	0.0475461	0.040676	0.0670449	0.0412364	0.0680617	0.0410056	0.0368642	0.0307836	0.120344	0.141199	0.0434197	0.0296922	0.00883411	0.371984	0.221235	0.356055	0.110602	0.0553326	0.0831526	0.0103143	0.0330782	0.0931555	0.056278	0.0468224	0.0568094	0.0697524	0.141041	0.139317	0.0497863	0.0436806	0.0458546	0.0482696	0.0478519	0.0646918	0.0989939	0.0711024	0.0231889	0.021613	0.0480103	0.0948291	0.0524871	0.0172835	0.0281085	0.155373	0.0228369	0.0571278	0.0369125	0.0461361
KU60019	0.0566577	0.053068	0.0599232	0.112179	0.0383354	0.0797255	0.0220865	0.032421	0.0415108	0.044721	0.0140619	0.0569754	0.0625566	0.0827254	0.0289955	0.0206956	0.0324931	0.0586169	0.0688141	0.042943	0.0768591	0.0619628	0.0537504	0.0526506	0.025771	0.0676126	0.0215336	0.0498868	0.0630136	0.0251799	0.0222999	0.122682	0.0907188	0.0655546	0.0510162	0.0191984	0.0345667	0.0688142	0.0752652	0.0543421	0.0428172	0.0704009	0.0657147	0.0602364	0.038542	0.0536306	0.0721947	0.049497	0.0393906
LAPATINIB	0.059488	0.025623	0.0260851	0.0397054	0.0324627	0.0659076	0.00856418	0.0322544	0.0141352	0.0092837	0.00191098	0.0986797	0.0244282	0.136772	0.00730076	0.0042676	0.0065688	0.0353329	0.123341	0.032201	0.0526454	0.039551	0.0154303	0.0359513	0.00551686	0.0322445	0.00451217	0.0234204	0.022448	0.0155507	0.00805091	0.0724242	0.0898751	0.0518302	0.0340714	0.0076915	0.00963059	0.0969548	0.122633	0.0670171	0.0393722	0.0568085	0.0346569	0.0633089	0.0105493	0.0357953	0.0587186	0.0256702	0.0615737
LE135	0.0480272	0.188903	0.0359162	0.0356392	0.0301951	0.0864333	0.0211657	0.0699618	0.0387443	0.033036	0.0194935	0.0517874	0.0795829	0.0392148	0.0151796	0.0243485	0.0178277	0.0389744	0.0291443	0.110969	0.0392758	0.0639945	0.0310046	0.132068	0.0249359	0.0174118	0.0160665	0.0365535	0.0434992	0.0769668	0.0255886	0.0852309	0.0491808	0.0516707	0.0401579	0.0187227	0.0277099	0.0455848	0.0418358	0.0502936	0.071014	0.0580913	0.155059	0.0421186	0.0514175	0.0984698	0.0648705	0.124734	0.0352644
LINIFANIB	0.0590801	0.052658	0.0620697	0.0376977	0.0691945	0.0470399	0.103984	0.057945	0.0717595	0.0481679	0.12021	0.0539747	0.0354064	0.0210375	0.0648552	0.0854036	0.054234	0.0352028	0.0516493	0.0257642	0.0403572	0.0686917	0.102923	0.0788497	0.0775581	0.0430217	0.843709	0.0469065	0.0273381	0.0592995	0.0754556	0.0486828	0.0467036	0.0562987	0.0759692	0.0787175	0.0777441	0.0413219	0.0332792	0.0514126	0.0585397	0.0595557	0.0270421	0.0463739	0.061146	0.0333131	0.0588672	0.0332503	0.0702004
LINSITINIB	0.0743784	0.0380594	0.0219076	0.0466981	0.048017	0.0955734	0.0388055	0.0598596	0.0604637	0.0791048	0.0366003	0.0440661	0.0257546	0.0344851	0.15795	0.0567711	0.129496	0.0603296	0.0298736	0.0428064	0.0312929	0.0739482	0.0442527	0.130087	0.0421035	0.0319749	0.035072	0.232696	0.419193	0.060116	0.0500598	0.0515715	0.0491256	0.0770479	0.0536616	0.0584828	0.0605987	0.0377328	0.0395108	0.0468568	0.0512176	0.0324269	0.0175196	0.0494373	0.0704138	0.0177347	0.0612195	0.0659676	0.0577924
LOVASTATIN	0.0767887	0.0425634	0.0345441	0.075027	0.0579319	0.0857462	0.0203419	0.0575204	0.0374021	0.0269162	0.0114241	0.0984065	0.0533961	0.12053	0.0215695	0.0207281	0.0252862	0.0540507	0.0700819	0.0622651	0.0669709	0.0626921	0.0363912	0.0543736	0.0181089	0.0486882	0.0158025	0.0549942	0.0575931	0.0403943	0.0269906	0.0634233	0.095565	0.0697121	0.0750442	0.0307844	0.0355645	0.0992225	0.129265	0.0849522	0.0470826	0.0772539	0.0411869	0.0727705	0.0374893	0.0454304	0.0810443	0.0583378	0.0767337
LY2183240	0.0953211	0.0424112	0.0622926	0.0635576	0.0524851	0.0582397	0.023502	0.0360009	0.0383078	0.0394536	0.0157749	0.0960513	0.0767511	0.0788373	0.0187227	0.0167009	0.0171262	0.0645691	0.0781264	0.0441222	0.0703117	0.0629133	0.0407313	0.0256491	0.0275875	0.0540312	0.0201671	0.0244965	0.0295481	0.0410227	0.0313819	0.073332	0.0943017	0.0823728	0.0352075	0.0245479	0.0268826	0.0805141	0.103099	0.0690704	0.0348581	0.06488	0.0634176	0.10335	0.0298682	0.0576034	0.0900855	0.0382542	0.0485063
MANUMYCINA	0.054114	0.051826	0.0454583	0.0457053	0.0464962	0.0761608	0.00975183	0.0590337	0.0441012	0.0225845	0.00575179	0.0780889	0.0842099	0.148831	0.00569051	0.00644989	0.00799456	0.022994	0.04856	0.0405685	0.198151	0.0742228	0.0345238	0.0342481	0.0138197	0.0206878	0.0102133	0.0220046	0.0214641	0.0394684	0.0146087	0.057807	0.0585957	0.0508116	0.052086	0.0126559	0.0303189	0.0793301	0.0996639	0.0562257	0.0224049	0.0691628	0.162454	0.0642947	0.0197981	0.130135	0.0601758	0.0600898	0.055268
MASITINIB	0.0541193	0.0784051	0.0446113	0.0418708	0.0567364	0.0648257	0.0630732	0.0843954	0.0386759	0.121655	0.255199	0.0487885	0.0444174	0.00744182	0.133908	0.159139	0.141969	0.0942466	0.0441886	0.128078	0.0158548	0.0378582	0.077029	0.0376566	0.0893164	0.0400765	0.10686	0.0806961	0.0355762	0.0722194	0.0783209	0.0518007	0.0456114	0.0560551	0.0573128	0.0937547	0.0703629	0.0372587	0.0236867	0.0565498	0.0739645	0.0566165	0.0219847	0.0339653	0.137484	0.0356081	0.0538861	0.0290832	0.0579196
MERCK60	0.0520674	0.0690966	0.0868489	0.0663248	0.060876	0.0578128	0.0645303	0.0525881	0.0692553	0.0888788	0.0584585	0.0553957	0.0661124	0.0341059	0.0612027	0.0484131	0.0670046	0.0441253	0.0607314	0.069885	0.0378354	0.0506313	0.142071	0.0422959	0.0594972	0.0612883	0.0622028	0.0591913	0.0531245	0.057602	0.0455488	0.107245	0.0669161	0.0797255	0.0711256	0.0539061	0.0427415	0.0493013	0.0417253	0.0710754	0.0955221	0.0716107	0.0516653	0.0698344	0.14021	0.0779966	0.0593213	0.0356419	0.0523551
METHOTREXATE	0.0752571	0.042584	0.0915954	0.0569353	0.0666969	0.0434372	0.0832924	0.0467687	0.0612383	0.0629156	0.0627207	0.0536052	0.0413589	0.0509949	0.0727188	0.0588069	0.0523241	0.0747705	0.0558457	0.0298876	0.0428332	0.0788061	0.0447328	0.0533264	0.078069	0.0948226	0.0734933	0.0401051	0.0555188	0.0363679	0.0835453	0.0576105	0.082875	0.0781524	0.0718545	0.0736012	0.0683688	0.0647224	0.046777	0.0834231	0.0969729	0.0664925	0.0333234	0.0781503	0.0591968	0.0422385	0.0768942	0.0352449	0.0452971
MG132	0.051644	0.0634106	0.0337513	0.0587936	0.0698326	0.0418859	0.0150463	0.0819547	0.101148	0.06498	0.0694345	0.0388651	0.111016	0.0144065	0.0204533	0.0342594	0.0316418	0.0214365	0.0334232	0.164191	0.0294416	0.0526533	0.0631856	0.0219624	0.0725442	0.0211264	0.0418749	0.0346689	0.017743	0.529876	0.0632699	0.0371421	0.0411991	0.0501856	0.0413004	0.0371827	0.0451268	0.0448418	0.0256525	0.0431781	0.0360055	0.0671057	0.26415	0.0338016	0.0747932	0.328377	0.0459806	0.0731523	0.0594366
MGCD265	0.0435845	0.0183311	0.0574145	0.0633995	0.0578473	0.0267034	0.069053	0.0301415	0.0700872	0.0904788	0.306102	0.0328739	0.0228563	0.00864091	0.108316	0.325167	0.16522	0.044125	0.0257991	0.0190868	0.0158208	0.0520949	0.0485972	0.0415569	0.110753	0.0665186	0.118728	0.0379151	0.0441274	0.0651216	0.0929819	0.0172887	0.0391323	0.0394064	0.064332	0.126515	0.11373	0.0277974	0.0190838	0.0478512	0.0449921	0.0419959	0.0129705	0.0359897	0.0717027	0.0180872	0.0523452	0.0316943	0.0466357
MK1775	0.0770588	0.0361809	0.0433762	0.0394558	0.0614072	0.0538413	0.058133	0.113713	0.0734164	0.113979	0.202694	0.0452716	0.0356175	0.0143845	0.0683016	0.0989529	0.157482	0.0360476	0.0353381	0.0557659	0.0370503	0.0626056	0.0650677	0.0307951	0.119549	0.0368528	0.092041	0.0901582	0.0401972	0.0678251	0.101454	0.0284939	0.0364489	0.0516149	0.0854223	0.112009	0.126188	0.0459906	0.0271778	0.0513727	0.032268	0.0729485	0.0143538	0.0393329	0.114904	0.0229587	0.0443835	0.0299623	0.0840866
MK2206	0.033543	0.0689191	0.0903122	0.0806038	0.0416505	0.0744534	0.0222658	0.0497708	0.030686	0.160045	0.0783793	0.0405442	0.0493973	0.0179032	0.0842732	0.0775285	0.143348	0.0953705	0.0663032	0.130882	0.0259962	0.0475481	0.187181	0.0358073	0.037576	0.0501865	0.0364205	0.0631738	0.0731588	0.047748	0.0272806	0.111491	0.0564929	0.0684312	0.0625635	0.0548018	0.0540551	0.053696	0.027725	0.0535789	0.0709535	0.100179	0.041502	0.0293248	0.117933	0.0544439	0.0574096	0.0331496	0.0322269
MLN2238	0.0638814	0.0458445	0.142398	0.0542782	0.0777477	0.030482	0.0477107	0.035112	0.0930929	0.0609289	0.0872366	0.0564994	0.0571958	0.0220405	0.0463417	0.0750188	0.0564927	0.0319263	0.0555635	0.0316781	0.054373	0.0526164	0.0708827	0.0309866	0.0874323	0.10648	0.105424	0.0239573	0.0302449	0.0820117	0.0868058	0.0305481	0.0460963	0.0687133	0.0596142	0.08275	0.0993039	0.0446799	0.041743	0.0696919	0.0577165	0.0786474	0.0639216	0.0645661	0.0447321	0.0896098	0.0622238	0.0441376	0.0503452
MST312	0.0628261	0.0891202	0.0472564	0.052075	0.0510761	0.0731054	0.0511127	0.0456533	0.0603153	0.061924	0.0521796	0.0492114	0.0520396	0.040381	0.0372971	0.101328	0.0387539	0.0516236	0.032515	0.045555	0.0372431	0.0849039	0.0660173	0.118183	0.0418775	0.0433065	0.0844695	0.0466061	0.0548368	0.0819544	0.0430858	0.0538948	0.0477292	0.0466116	0.067404	0.0457133	0.0561464	0.0403498	0.034339	0.0426017	0.0524547	0.0595475	0.0478687	0.0425608	0.101779	0.043553	0.0718638	0.10352	0.0544151
MYRICETIN	0.0442088	0.032595	0.073202	0.0608495	0.0469392	0.0565183	0.0184051	0.0324013	0.0453948	0.0237613	0.0112178	0.0547203	0.0464399	0.0987518	0.0120704	0.0151286	0.0115286	0.0499836	0.0698824	0.0282391	0.0557098	0.0629503	0.0315121	0.046652	0.0254379	0.0841603	0.0198822	0.0169193	0.0232385	0.0245515	0.0333339	0.0853481	0.0803583	0.0798936	0.0482575	0.0159647	0.0337667	0.0787727	0.0783638	0.0483346	0.0457975	0.0711078	0.0594228	0.089475	0.040877	0.0547358	0.0805628	0.0270472	0.0370561
MYRIOCIN	0.0739306	0.045605	0.0894701	0.0574944	0.0503667	0.0486102	0.0656902	0.0570895	0.0535908	0.109846	0.230344	0.0676762	0.0400612	0.0185406	0.0763979	0.182383	0.158718	0.0586352	0.0292811	0.0359909	0.0219094	0.0662387	0.0550072	0.0428919	0.0869465	0.0518712	0.0907486	0.0381522	0.0758025	0.0594499	0.0877547	0.0324268	0.0506946	0.0672191	0.0731986	0.162547	0.159969	0.0420858	0.028211	0.0606887	0.0617208	0.0653309	0.022498	0.0399422	0.143809	0.0268714	0.055568	0.0352507	0.0412816
NARCICLASINE	0.0480936	0.0388863	0.0377152	0.0281884	0.0935258	0.0477506	0.0245884	0.05331	0.085486	0.0930945	0.102962	0.0414106	0.101736	0.0160808	0.0597518	0.0501191	0.0527331	0.0384439	0.0408168	0.136745	0.0331613	0.0405464	0.0906859	0.044201	0.0728348	0.0216193	0.0564723	0.0665226	0.0470099	0.0827392	0.0561539	0.068888	0.0482272	0.0535962	0.0517297	0.0418913	0.0379603	0.0467975	0.0284256	0.0483828	0.0626962	0.048336	0.0449034	0.0500649	0.0595573	0.0715502	0.05466	0.0438651	0.0414192
NAVITOCLAX	0.0834711	0.053239	0.0789658	0.0396999	0.0589172	0.046852	0.074342	0.0794692	0.068164	0.0500548	0.0482177	0.0558315	0.0276463	0.0414866	0.0502117	0.0253953	0.0303122	0.0748151	0.068356	0.0368147	0.0476535	0.0578405	0.040966	0.0315874	0.0669037	0.0476844	0.0468267	0.0349129	0.030562	0.0384368	0.0663561	0.118884	0.0644138	0.0896914	0.0385711	0.0329277	0.0309417	0.0787511	0.0542	0.0616544	0.0868886	0.0502702	0.0337687	0.102493	0.0354513	0.0392378	0.0737221	0.0214595	0.0444169
NECROSTATIN1	0.0787674	0.0733722	0.0533567	0.111209	0.0388418	0.0956179	0.016624	0.0376291	0.0416853	0.0355933	0.0163965	0.0380606	0.0637323	0.0854128	0.015587	0.0228315	0.0249259	0.0675186	0.0337078	0.0454332	0.0655389	0.0784022	0.04445	0.0615648	0.0215566	0.0536558	0.0129924	0.0279445	0.0733726	0.0533161	0.0225625	0.109431	0.0719823	0.0634658	0.0443145	0.0161195	0.0356421	0.0714005	0.0596919	0.0455426	0.0373477	0.0651187	0.0789294	0.0520042	0.0510475	0.0867318	0.0665764	0.0588998	0.0285147
NERATINIB	0.0369006	0.147476	0.0450976	0.203369	0.0402194	0.0692895	0.0194622	0.0554815	0.0362908	0.133318	0.121663	0.0590839	0.103428	0.012038	0.0505285	0.221001	0.113673	0.0556074	0.0344084	0.251936	0.0183314	0.0510294	0.123761	0.110915	0.0398943	0.0374825	0.0439882	0.0939219	0.108301	0.131937	0.0407083	0.048709	0.0357268	0.0446508	0.062617	0.0830371	0.0757569	0.0445492	0.0203473	0.0544766	0.0653545	0.122769	0.113704	0.0271515	0.19417	0.131232	0.044657	0.0820355	0.0408389
NICLOSAMIDE	0.0273394	0.175831	0.0221319	0.0692927	0.0530228	0.0541301	0.00678377	0.0662014	0.0385992	0.0796216	0.0308004	0.0325531	0.152727	0.0159777	0.026055	0.0347347	0.0366159	0.0315964	0.0435009	0.889784	0.0226918	0.0339342	0.0641135	0.0505639	0.0264607	0.0162691	0.0149499	0.0979682	0.0761257	0.0905049	0.0269281	0.0712958	0.0424866	0.0363551	0.0391966	0.0201101	0.0206803	0.0395977	0.0252378	0.0638976	0.0488102	0.0802523	0.119887	0.025751	0.0678932	0.113673	0.0372441	0.213914	0.0424722
NILOTINIB	0.0495186	0.153722	0.101219	0.0850081	0.0521181	0.054686	0.0468564	0.0215342	0.0603646	0.170487	0.342593	0.0473475	0.118233	0.012294	0.127257	0.201801	0.228868	0.107887	0.0271885	0.108623	0.0132621	0.0360776	0.0799214	0.0740916	0.101848	0.0594362	0.101165	0.0844613	0.100236	0.0790899	0.0897323	0.0816436	0.0399605	0.0562704	0.0428482	0.0734895	0.0490827	0.0207539	0.0173542	0.0472531	0.105732	0.0559857	0.0818824	0.0368548	0.184011	0.106976	0.0528761	0.0957254	0.024207
NINTEDANIB	0.037172	0.042641	0.0500464	0.0769862	0.0569028	0.0391166	0.111295	0.0670632	0.061143	0.148018	0.149764	0.043534	0.0223145	0.0100997	0.162509	0.128604	0.314632	0.0513587	0.0450815	0.0493036	0.0186458	0.0557443	0.0928605	0.0409059	0.101854	0.0688564	0.114207	0.203995	0.0747393	0.0681549	0.0878848	0.0401418	0.0379566	0.0434579	0.0705796	0.109411	0.0680908	0.0336731	0.0244818	0.054472	0.0615501	0.0544308	0.0129224	0.0376727	0.11038	0.0212893	0.0565786	0.0432186	0.0608499
NSC23766	0.0520669	0.0307036	0.0568639	0.0409558	0.0855761	0.0466801	0.0363426	0.0437602	0.0434784	0.0721067	0.114539	0.0708744	0.0544182	0.0129603	0.121671	0.119896	0.0872948	0.0951208	0.070012	0.0654539	0.0163312	0.0346107	0.0474131	0.0469961	0.0645255	0.0804628	0.0760124	0.0949869	0.0609608	0.0386359	0.0656682	0.0293579	0.0633799	0.0442815	0.0791395	0.136282	0.0723374	0.0311644	0.0302245	0.0641235	0.0722591	0.0610339	0.0146045	0.0536456	0.0876021	0.0241515	0.0519632	0.0298123	0.0687608
NSC632839	0.0384791	0.0575655	0.0304164	0.0618915	0.0505801	0.0466819	0.00654562	0.0538348	0.0577249	0.0522884	0.0316953	0.0342083	0.111469	0.0133147	0.0161238	0.0296252	0.0186082	0.0174775	0.0368928	0.19211	0.0225626	0.0415568	0.0814409	0.0325955	0.0279594	0.0169412	0.0239619	0.0320788	0.0196808	0.343821	0.0236699	0.0470046	0.0361732	0.0399353	0.0345703	0.0274632	0.0249198	0.0407444	0.0255989	0.0361654	0.0391985	0.0619209	0.301553	0.0257519	0.0629846	0.441688	0.0364954	0.0585128	0.0403987
NUTLIN3	0.0341479	0.104289	0.0911778	0.0413176	0.0617505	0.0465495	0.0311519	0.0366418	0.0519919	0.0512883	0.0524598	0.0499163	0.0591742	0.0182339	0.061122	0.0554289	0.0301242	0.0785365	0.0697557	0.131813	0.0229535	0.0364155	0.0471871	0.0573129	0.0628296	0.0581677	0.0623431	0.0507231	0.0416104	0.0483221	0.0470888	0.135016	0.050384	0.0563429	0.028022	0.0284745	0.0182008	0.038171	0.0410389	0.0720601	0.142001	0.0519063	0.09265	0.0581894	0.0391182	0.113777	0.0587998	0.0425797	0.0342166
NVPBEZ235	0.0872999	0.0443158	0.0412576	0.0710082	0.060726	0.0620192	0.0385074	0.0466893	0.055442	0.104571	0.0895243	0.0590967	0.0819936	0.0418334	0.0856101	0.0716465	0.0854486	0.125899	0.0482331	0.0763946	0.0279062	0.0572523	0.0611525	0.052337	0.0695699	0.0425178	0.0532758	0.0797909	0.0691073	0.0631276	0.0711046	0.0705405	0.0706088	0.0587557	0.0674832	0.0670279	0.0492426	0.041821	0.0349354	0.0515805	0.0571771	0.0460449	0.0279905	0.0543454	0.0766706	0.0313647	0.0614247	0.0427834	0.0456192
NVPTAE684	0.0382411	0.0520204	0.051268	0.0669719	0.0587329	0.063114	0.034598	0.0361238	0.0454222	0.205578	0.258667	0.0426432	0.0728605	0.00923523	0.207301	0.149835	0.58824	0.0857995	0.0547756	0.160838	0.0122801	0.0292617	0.159269	0.0515961	0.064575	0.0637605	0.116506	0.223268	0.0853504	0.0742048	0.0597993	0.0517456	0.0456494	0.0473383	0.0611346	0.0935888	0.072865	0.0260231	0.0203178	0.0559632	0.0607739	0.0651466	0.0240292	0.0259493	0.197274	0.0388772	0.0592772	0.0584186	0.0523976
OBATOCLAX	0.0410966	0.070789	0.0218934	0.0430484	0.050008	0.0729537	0.00718101	0.030471	0.0278782	0.043392	0.0134087	0.0770476	0.080312	0.038778	0.0135367	0.0344892	0.0115201	0.0205783	0.0590486	0.1582	0.0340536	0.0468583	0.0302937	0.120049	0.0157954	0.0162971	0.0143308	0.0177751	0.0511705	0.0614158	0.0168915	0.0566814	0.0619077	0.0452238	0.0416721	0.0189228	0.0225162	0.0678275	0.0524473	0.0601528	0.0512036	0.0870081	0.113815	0.039763	0.0255803	0.0697692	0.051384	0.12469	0.041054
OLAPARIB	0.0439964	0.0806906	0.0371158	0.0434401	0.0580546	0.0594707	0.036987	0.0394071	0.0440258	0.0773063	0.0615753	0.0421741	0.0414309	0.0125815	0.201753	0.124727	0.0906987	0.0907174	0.0834151	0.17424	0.0144608	0.02625	0.077227	0.111474	0.0487472	0.0712301	0.0705294	0.160936	0.0710073	0.07849	0.0533762	0.0937102	0.0568758	0.0484545	0.0342562	0.0634249	0.0249184	0.0305863	0.0343857	0.0721809	0.208272	0.0393692	0.0374602	0.0642088	0.107284	0.0507519	0.0715259	0.0435674	0.0659367
OLIGOMYCINA	0.0435258	0.153319	0.0396377	0.0534714	0.0405389	0.0639557	0.0303453	0.0397545	0.0373141	0.0386888	0.0309072	0.0345983	0.0589566	0.0274159	0.0235958	0.0963002	0.0255666	0.0570227	0.0360316	0.0716437	0.0234531	0.0503164	0.0236623	0.19952	0.0305604	0.0300341	0.0301647	0.0306957	0.107973	0.0518569	0.0325619	0.088688	0.0429939	0.0440936	0.0323866	0.025089	0.0218159	0.0353827	0.0263522	0.0409414	0.0788942	0.0376829	0.0711413	0.0393251	0.0338885	0.054449	0.05106	0.102676	0.039623
OSI027	0.0440977	0.0351236	0.0536665	0.0653676	0.054957	0.0741079	0.0280513	0.0196229	0.0425169	0.119031	0.0857155	0.0318882	0.0473191	0.0203397	0.253205	0.10074	0.136578	0.331835	0.0419777	0.0819093	0.0140749	0.0372848	0.0614772	0.0603155	0.0552355	0.0586691	0.0413414	0.100257	0.116691	0.0330908	0.047657	0.0771445	0.0503756	0.0481655	0.0462402	0.0629065	0.0416608	0.0291671	0.0297608	0.051442	0.0645411	0.0476082	0.0182568	0.0493944	0.060871	0.024482	0.0524024	0.0223874	0.0312818
OSI930	0.068502	0.054745	0.0457966	0.0609694	0.073019	0.0722715	0.0483752	0.0373982	0.0511164	0.0691757	0.0563536	0.0944666	0.0445704	0.0427715	0.0735347	0.0811126	0.0587745	0.0956793	0.0684476	0.0391442	0.0286564	0.049591	0.0373132	0.080955	0.0513174	0.063056	0.0543242	0.0595753	0.0711341	0.0504225	0.0700863	0.0671647	0.0798924	0.0726118	0.0857832	0.0757828	0.0716556	0.0502408	0.0451778	0.0788712	0.128212	0.0568603	0.0279188	0.0687301	0.054626	0.0332981	0.0733614	0.0447989	0.054553
OUABAIN	0.0392356	0.0391377	0.0685529	0.0248944	0.0943755	0.0378546	0.0544633	0.0330677	0.0911327	0.0821111	0.106722	0.0370496	0.0564912	0.0202451	0.0663907	0.0821234	0.0497347	0.0321388	0.0576545	0.0571707	0.0278766	0.0485197	0.0732879	0.0738104	0.07212	0.0301652	0.155597	0.0291043	0.040432	0.0546135	0.0596744	0.0642228	0.0452829	0.0613931	0.0598988	0.0558582	0.045318	0.0512178	0.0281141	0.069931	0.0707176	0.0580996	0.0296201	0.0621648	0.0404025	0.034724	0.0686448	0.0505262	0.035626
PAC1	0.0517766	0.0418728	0.0365513	0.0398326	0.0566891	0.0507421	0.0258371	0.0242164	0.0485912	0.0338329	0.0153889	0.0534986	0.0395751	0.0520645	0.0263093	0.0395433	0.015744	0.0501621	0.0540199	0.0412922	0.0338293	0.0433694	0.0441255	0.103554	0.0234276	0.0331421	0.0365378	0.036836	0.0400822	0.0671939	0.0273313	0.0637187	0.0617191	0.051542	0.0510381	0.0296907	0.0223109	0.044263	0.0526031	0.0489875	0.0636153	0.0554683	0.0479129	0.0721577	0.064049	0.0450517	0.0867855	0.0763016	0.0394975
PACLITAXEL	0.0364908	0.0381065	0.1767	0.0813486	0.0593585	0.0545437	0.0244193	0.0274693	0.0304111	0.0390397	0.0224082	0.0519644	0.0815056	0.0362857	0.0236452	0.0415249	0.032843	0.0700186	0.126565	0.0404969	0.0357577	0.0463935	0.038117	0.0310947	0.0299653	0.257238	0.0341564	0.0290154	0.0325167	0.0230867	0.0357623	0.0522321	0.0744568	0.0705403	0.0540697	0.0442388	0.0446142	0.0535053	0.0699501	0.0683741	0.0418368	0.0774977	0.0468831	0.0547853	0.0566088	0.0627908	0.0718513	0.032172	0.0500504
PARBENDAZOLE	0.0535771	0.035717	0.075547	0.0494675	0.120126	0.0278683	0.0745314	0.0312411	0.0737719	0.0607256	0.0646879	0.0501108	0.0428045	0.0286991	0.0855217	0.0605485	0.0416358	0.0561844	0.0676817	0.032833	0.024402	0.046309	0.0434544	0.0413453	0.105656	0.0585848	0.0813893	0.0427762	0.0474704	0.0574477	0.0859238	0.0746313	0.0719123	0.0647385	0.0690346	0.0699606	0.0459778	0.0477374	0.0351141	0.0679426	0.0657292	0.0540325	0.0256497	0.0933919	0.0514378	0.0316405	0.0932371	0.0367493	0.0420173
PARTHENOLIDE	0.0753674	0.049328	0.0364526	0.0868183	0.0547847	0.0725294	0.0187253	0.0630619	0.0474413	0.0288923	0.0146167	0.0753738	0.0632973	0.0579203	0.0133768	0.0169591	0.0146958	0.0391136	0.0823224	0.0717435	0.0553475	0.0569935	0.0334391	0.0345782	0.0278548	0.038053	0.0160245	0.0267219	0.0220625	0.0659039	0.0375966	0.0631727	0.0745088	0.0573896	0.0420508	0.0195457	0.032324	0.0945482	0.0870314	0.0624234	0.0334057	0.0788186	0.0821548	0.0595395	0.0586497	0.0935518	0.0625507	0.0455196	0.0694326
PAZOPANIB	0.0356315	0.0298513	0.0640573	0.0522275	0.0684537	0.0260551	0.066295	0.0255878	0.0610814	0.169519	0.315664	0.0232573	0.0305103	0.00637057	0.282042	0.400916	0.238306	0.0847916	0.0364034	0.0454335	0.00775221	0.0325875	0.0431422	0.0436417	0.123903	0.101616	0.146398	0.086809	0.108705	0.0702056	0.126139	0.0298086	0.0338483	0.0377466	0.0394759	0.137073	0.0581147	0.0187953	0.0152962	0.0439441	0.0772943	0.0339822	0.0121971	0.0334604	0.145937	0.0185989	0.0514563	0.0387996	0.0416889
PF543	0.0733802	0.0641944	0.0338536	0.0921673	0.0374385	0.283334	0.0175656	0.0841174	0.0441622	0.0371508	0.016272	0.0801109	0.0583965	0.0951101	0.0132008	0.0264251	0.0286741	0.0286945	0.0362703	0.0407186	0.118455	0.127418	0.0536965	0.0546584	0.0200636	0.0337246	0.0150698	0.0277291	0.0346733	0.0527952	0.0209198	0.0597123	0.0705439	0.088946	0.10956	0.0346959	0.0894919	0.128873	0.0727441	0.0629771	0.0319956	0.098147	0.0632645	0.0415964	0.0412573	0.0644078	0.0500807	0.0535921	0.0685284
PF750	0.0371768	0.199078	0.0535652	0.0867536	0.0333728	0.0760057	0.0230849	0.0451503	0.0397635	0.0537035	0.033603	0.0642499	0.0572733	0.0264415	0.0349426	0.0994299	0.0562527	0.071865	0.040333	0.125258	0.0227969	0.0548408	0.0450226	0.259212	0.0255916	0.0355615	0.0291008	0.0519784	0.139785	0.0739901	0.0316726	0.0875539	0.0433928	0.0485513	0.0438643	0.0369345	0.0338741	0.0321675	0.0287896	0.0625199	0.118202	0.0597467	0.173651	0.0346102	0.0728195	0.125718	0.0518796	0.172607	0.0287407
PHA793887	0.0390756	0.0337499	0.0522666	0.028401	0.0409241	0.0284434	0.554428	0.0384645	0.0568902	0.0830076	0.314941	0.0283071	0.0192754	0.00806839	0.119882	0.152885	0.134066	0.0395	0.0230249	0.0148508	0.0162629	0.0433842	0.0581255	0.0510007	0.14223	0.0445379	0.969363	0.0492818	0.0240924	0.040075	0.0948043	0.0318399	0.0258722	0.0454332	0.063558	0.086167	0.0960432	0.0212965	0.0165482	0.0379982	0.0503677	0.037183	0.0104674	0.0297373	0.0802057	0.0112068	0.046776	0.0233133	0.0339225
PHLORETIN	0.0379482	0.148522	0.019446	0.0535059	0.0398006	0.0774211	0.0426589	0.124993	0.041663	0.0329067	0.0307256	0.0498127	0.073071	0.0229755	0.0309024	0.0535801	0.0321132	0.0461601	0.0353377	0.140545	0.0464487	0.0534538	0.0521376	0.252827	0.0360457	0.0261442	0.050702	0.168017	0.0513713	0.0575243	0.0399211	0.0619365	0.0395295	0.0425601	0.0415504	0.0223029	0.0399785	0.0316129	0.0329757	0.044356	0.0690612	0.04489	0.0908146	0.0346265	0.0556767	0.0677745	0.0471852	0.121853	0.0833891
PI103	0.066783	0.0527239	0.0254359	0.0298594	0.0580773	0.0797313	0.0343494	0.065818	0.0330386	0.117258	0.0827008	0.06395	0.0554664	0.0168454	0.238611	0.0614561	0.111781	0.289626	0.0526439	0.204597	0.0115914	0.0301975	0.0417464	0.0539516	0.0460206	0.030711	0.0370533	0.159072	0.112706	0.0455634	0.0682547	0.0657668	0.053896	0.0579165	0.0510876	0.0714208	0.0455414	0.0404305	0.0316756	0.0527392	0.114926	0.0391646	0.0112657	0.0551113	0.100184	0.0152262	0.0528871	0.0265707	0.0552581
PIFITHRINALPHA	0.062577	0.0463072	0.0580626	0.0348604	0.0226397	0.0860408	0.015003	0.0441828	0.0235928	0.014645	0.00494737	0.0643807	0.0509119	0.131666	0.00521007	0.00727973	0.00732607	0.0383184	0.0553215	0.0196958	0.0867586	0.0576048	0.0176308	0.0412826	0.0104918	0.0371852	0.00877203	0.00982471	0.0235158	0.0142016	0.0144199	0.0867251	0.0626489	0.0795653	0.0326064	0.0109657	0.0272526	0.087815	0.0889014	0.0352135	0.0321721	0.0511169	0.0534156	0.0707851	0.0191291	0.034786	0.0630281	0.0316592	0.0248917
PIFITHRINMU	0.0445357	0.0501423	0.0777736	0.0722135	0.0695336	0.0407696	0.0254078	0.0351737	0.0540255	0.0818212	0.105398	0.0556876	0.0813472	0.0137074	0.071109	0.0768483	0.064974	0.0732974	0.104945	0.133346	0.0172467	0.0256673	0.0620147	0.0330584	0.064963	0.0527666	0.0640634	0.0484471	0.0426808	0.108682	0.0664822	0.0865127	0.0612851	0.0564386	0.0324359	0.0658579	0.0349236	0.0330981	0.0320856	0.0660354	0.092137	0.0683153	0.0862155	0.0499765	0.125133	0.117231	0.069009	0.0320989	0.0330045
PIPERLONGUMINE	0.0512272	0.0569517	0.0369494	0.0761987	0.0885548	0.0476052	0.0213003	0.0996171	0.113595	0.0624684	0.097293	0.0424721	0.061939	0.0110831	0.0335101	0.0659789	0.0532513	0.01734	0.0391211	0.0867475	0.0400038	0.057168	0.199194	0.0355302	0.0665422	0.0296417	0.0774146	0.0626424	0.0297845	0.321456	0.0532658	0.0334468	0.0424629	0.0466093	0.057557	0.0668007	0.0597358	0.0394104	0.0286876	0.0408329	0.0403023	0.0698773	0.156351	0.0303096	0.0985571	0.267126	0.0425068	0.060838	0.0681409
PLX4720	0.0552953	0.0999182	0.0615052	0.0783685	0.0611199	0.0463098	0.0310773	0.0284244	0.0513356	0.0390925	0.0677129	0.0535398	0.0909615	0.0228833	0.0502934	0.165695	0.0405146	0.0503712	0.0526342	0.0455251	0.0228195	0.0525215	0.0234428	0.0809363	0.0464474	0.0514186	0.0484782	0.0289965	0.100602	0.0777542	0.0610287	0.040413	0.0655817	0.0442913	0.0540164	0.0823006	0.061808	0.0363494	0.0348836	0.0760849	0.0640586	0.0434158	0.0713646	0.0434181	0.0480746	0.0450032	0.0645953	0.108343	0.0483334
PRIMA1	0.0671027	0.0388191	0.0472834	0.0392622	0.0488054	0.0565538	0.0352181	0.0884612	0.0517394	0.0234078	0.0115052	0.0716259	0.0295504	0.0929403	0.0175499	0.00698753	0.0139042	0.0432167	0.0628088	0.0318151	0.0794235	0.0481077	0.0298051	0.0236387	0.0338541	0.0245289	0.016072	0.030473	0.0231863	0.0269653	0.0332234	0.141129	0.0787422	0.0980527	0.0356308	0.0143244	0.0165798	0.08985	0.0749948	0.0459941	0.0485247	0.0441733	0.0471341	0.0925148	0.0226394	0.0537032	0.0731621	0.0191744	0.0426427
PRIMA1MET	0.0766425	0.0202962	0.0160374	0.0396054	0.0501249	0.0275224	0.0563299	0.0450366	0.0632725	0.0918989	0.44471	0.0413481	0.0159232	0.00509959	0.120283	0.360867	0.136516	0.0263069	0.0142113	0.0172493	0.0126529	0.0531152	0.0431112	0.035621	0.134183	0.018952	0.101217	0.0545599	0.059492	0.126923	0.097206	0.0124542	0.0381626	0.0455433	0.0781921	0.193325	0.155962	0.0235797	0.0122082	0.0333085	0.0380124	0.0393511	0.0102053	0.0268868	0.0802175	0.0129577	0.0434458	0.0284293	0.0473896
PRL3INHIBITORI	0.0594177	0.0474437	0.0225939	0.0368478	0.0710716	0.0414114	0.0541276	0.213017	0.0703278	0.0495884	0.0473086	0.0428891	0.0388606	0.0176594	0.0683214	0.0455061	0.0345458	0.0371672	0.0712985	0.198115	0.026656	0.0658549	0.0315571	0.0383096	0.0656111	0.0284215	0.0472643	0.166875	0.0329282	0.0804461	0.0895861	0.0309279	0.0579928	0.0376153	0.0652463	0.0643565	0.0451953	0.056478	0.0345901	0.0656811	0.0525925	0.0460553	0.0171933	0.0590397	0.0943806	0.0230732	0.0475074	0.0433148	0.189639
PROCARBAZINE	0.0634501	0.0443408	0.0619634	0.0534328	0.0344063	0.0533023	0.0259707	0.0697332	0.0514887	0.0211173	0.0114546	0.0618085	0.027247	0.0820476	0.0103945	0.0113949	0.0132908	0.0256212	0.0483607	0.0159156	0.131433	0.101704	0.028674	0.0249295	0.0289805	0.0318538	0.0162964	0.0121886	0.0190553	0.0373915	0.0237194	0.0626662	0.0619069	0.0850366	0.0488098	0.02043	0.0441286	0.0903869	0.104591	0.0561058	0.024361	0.0528493	0.0516982	0.0641313	0.0187181	0.0462851	0.0578806	0.029775	0.0429228
PROCHLORPERAZINE	0.0474779	0.0554906	0.0874352	0.109679	0.0674653	0.0389389	0.0440923	0.066777	0.058092	0.075957	0.0354417	0.0445472	0.0316663	0.0477785	0.0258542	0.0321483	0.045283	0.0371704	0.0701288	0.0495105	0.0927462	0.0936362	0.09687	0.0355039	0.0468881	0.0594825	0.0323498	0.0420624	0.0425257	0.0589433	0.0405423	0.0804357	0.0592079	0.0735279	0.075058	0.0348132	0.0555147	0.104938	0.0649894	0.0926102	0.0431224	0.123037	0.0583941	0.0602444	0.049662	0.0647196	0.0689276	0.0572655	0.0628562
PURMORPHAMINE	0.0460033	0.0748497	0.0358504	0.0498039	0.0464451	0.0534716	0.0394692	0.060885	0.0638092	0.115685	0.225076	0.0475225	0.0574244	0.0097767	0.0876548	0.263685	0.0892439	0.0543989	0.0297877	0.0711799	0.01642	0.062655	0.060279	0.083852	0.0998155	0.0453736	0.0843721	0.0694067	0.0983852	0.108148	0.0962283	0.0339195	0.05239	0.0450357	0.0690013	0.0973378	0.10941	0.0270394	0.0253986	0.053208	0.0842877	0.0637455	0.0371374	0.0341975	0.131993	0.0384539	0.0477554	0.070066	0.041124
PX12	0.0525672	0.04362	0.0439957	0.0458447	0.0562912	0.0403671	0.0307224	0.0345848	0.0640859	0.0751425	0.167761	0.0485638	0.0574159	0.0112067	0.0419397	0.178752	0.0417069	0.0514924	0.0264523	0.0629718	0.0173787	0.0553423	0.0748343	0.113552	0.075387	0.0368877	0.0827758	0.0306322	0.0421839	0.132907	0.0642048	0.0313071	0.0409691	0.0475021	0.0568631	0.0744533	0.0612045	0.037187	0.02126	0.0409897	0.068164	0.0606691	0.0941639	0.0386411	0.0680084	0.105305	0.05387	0.0407915	0.0423252
PYRAZOLANTHRONE	0.0906063	0.128405	0.0460657	0.0895738	0.0569951	0.08874	0.057712	0.146626	0.0596648	0.0522968	0.0479587	0.0722245	0.0793171	0.0393322	0.0324422	0.0552792	0.0597549	0.0380647	0.0432999	0.0479035	0.0734304	0.110524	0.0434307	0.0552056	0.0598801	0.0465156	0.0461876	0.0803025	0.0643541	0.0837741	0.0678068	0.0369563	0.0517156	0.0492249	0.0874115	0.0598104	0.121199	0.0625918	0.0572001	0.0644454	0.024634	0.0680194	0.0349	0.0445749	0.0759901	0.0316395	0.0525594	0.11022	0.0957615
QS11	0.082669	0.0397555	0.0530406	0.0534454	0.100632	0.0585713	0.0293819	0.0636658	0.146472	0.0518563	0.0318556	0.0542942	0.0507428	0.0769481	0.0278284	0.0344073	0.0297865	0.0306869	0.0428022	0.024099	0.112178	0.0974385	0.0530173	0.0443341	0.0540588	0.0446437	0.0393466	0.0334633	0.0445526	0.0602275	0.0419074	0.0568281	0.0655916	0.0627299	0.100314	0.0420137	0.0848242	0.10062	0.078622	0.0662691	0.0506169	0.0558655	0.0563079	0.072784	0.0421791	0.0697616	0.0599347	0.047503	0.0477474
QUIZARTINIB	0.038445	0.0580703	0.0711898	0.0572231	0.0610706	0.0610397	0.0374568	0.0323339	0.034501	0.105645	0.146194	0.0517522	0.063153	0.0111294	0.273459	0.287248	0.126849	0.0964264	0.0684781	0.105203	0.00954802	0.0297357	0.0568061	0.103051	0.0512929	0.0477748	0.12124	0.0930879	0.11423	0.0537386	0.0574311	0.0481151	0.0514854	0.0437129	0.0505117	0.115883	0.0437976	0.0188501	0.0254788	0.0664253	0.149073	0.0407081	0.0349628	0.0413444	0.0788562	0.0323791	0.0529367	0.0500796	0.0536354
RG108	0.0484882	0.0233068	0.02324	0.0351426	0.0635375	0.024379	0.0385867	0.0478769	0.0517292	0.0963158	0.143993	0.0419376	0.021969	0.00713506	0.189842	0.13315	0.110889	0.0409221	0.0541116	0.0590008	0.0102185	0.037777	0.0371665	0.0415297	0.0811898	0.0354001	0.0803605	0.16184	0.0906688	0.068338	0.0851972	0.0231868	0.0444418	0.0432225	0.0587443	0.165802	0.0461482	0.0243985	0.0186099	0.0628039	0.0602519	0.0396255	0.00924342	0.0411619	0.0735726	0.0120217	0.0499651	0.0423897	0.0937671
RITA	0.0560073	0.0446009	0.0379634	0.109799	0.0392178	0.0584785	0.0155408	0.0377782	0.0474609	0.0296641	0.0221043	0.0596108	0.0510656	0.0411416	0.0169525	0.0311814	0.021447	0.0346064	0.0387285	0.0263154	0.0630215	0.0756089	0.05764	0.0988627	0.0299171	0.0446518	0.0286954	0.0281677	0.0456846	0.0794089	0.0277243	0.0562882	0.0577214	0.0541824	0.0385526	0.0276715	0.0371495	0.0486006	0.0575138	0.0336495	0.0384524	0.0704632	0.126943	0.0437759	0.0442857	0.117289	0.0583871	0.0464594	0.0527977
RUXOLITINIB	0.0650009	0.0694584	0.0854779	0.0520182	0.0522924	0.0542904	0.0487231	0.0741269	0.0818835	0.112861	0.161241	0.0432082	0.0603994	0.0140804	0.0768267	0.098156	0.0924947	0.0404756	0.0421633	0.05086	0.0303101	0.0664197	0.0684153	0.03038	0.0872626	0.0598199	0.11013	0.0559685	0.0500758	0.0799351	0.0799677	0.0609817	0.0494084	0.0656287	0.0748996	0.0811316	0.117857	0.0492607	0.0348745	0.0565674	0.0443679	0.0542927	0.0342863	0.0407634	0.0809556	0.0423685	0.0637394	0.04652	0.0649734
SALERMIDE	0.0284934	0.0843455	0.0398166	0.057716	0.0400925	0.0694206	0.00968746	0.033105	0.0371407	0.043965	0.0277096	0.0409505	0.14426	0.0227014	0.0173671	0.0604135	0.0192499	0.0345587	0.0362599	0.183867	0.0242039	0.0487338	0.0486065	0.176955	0.0193543	0.026009	0.0308185	0.0337237	0.0548546	0.0620915	0.0188567	0.0595942	0.0332239	0.0437858	0.0366717	0.0282497	0.0212499	0.0419895	0.0355673	0.0451537	0.0530688	0.0530657	0.201612	0.032719	0.0481928	0.167053	0.0399501	0.0844731	0.0369961
SARACATINIB	0.0246197	0.0319285	0.0939671	0.0787352	0.0581491	0.0208298	0.10855	0.0199778	0.0525754	0.124825	0.193255	0.0300749	0.0227234	0.00867896	0.172682	0.13648	0.371682	0.0702141	0.0624011	0.0268991	0.021258	0.0409718	0.159564	0.0229374	0.111518	0.099294	0.121907	0.102829	0.052732	0.0511033	0.0717109	0.0511913	0.0411639	0.0522157	0.0495132	0.0833597	0.0581315	0.0321072	0.0230061	0.0693326	0.0551699	0.0738029	0.0155835	0.0403514	0.098438	0.0271867	0.0681736	0.0255016	0.0354805
SB225002	0.138974	0.0473123	0.02128	0.0498379	0.0390008	0.108391	0.0226026	0.102601	0.0592734	0.043411	0.0221776	0.119156	0.0440489	0.0920805	0.0220754	0.0315755	0.0261952	0.0347451	0.0248713	0.0462963	0.144747	0.118298	0.0335144	0.0751914	0.0277969	0.0136265	0.0181502	0.0357517	0.0769045	0.0675623	0.0275486	0.0456087	0.0787074	0.0617758	0.0846229	0.04787	0.0651453	0.0753363	0.0881937	0.0568139	0.0330595	0.0687973	0.0577516	0.0548361	0.0289899	0.0455267	0.0588143	0.0769041	0.0676891
SB431542	0.0466937	0.0359036	0.0490682	0.050727	0.0732947	0.022473	0.087361	0.0568671	0.0792863	0.0710014	0.111609	0.0449918	0.0286537	0.0139601	0.158807	0.0687394	0.0817553	0.0781553	0.0679705	0.0568013	0.0175274	0.0367677	0.0472876	0.0443659	0.114095	0.0463664	0.112519	0.101752	0.0475599	0.0589612	0.112671	0.0578373	0.0473758	0.0474453	0.0527248	0.113767	0.0412818	0.0387929	0.0279997	0.0908524	0.111455	0.0483539	0.0190368	0.0868163	0.0681629	0.0251054	0.0694481	0.0361501	0.0524083
SB525334	0.0780689	0.0559831	0.0425465	0.051804	0.0760729	0.0486286	0.0711824	0.0786367	0.0565117	0.125948	0.0890535	0.0449702	0.033054	0.018082	0.128121	0.0755119	0.0903445	0.064553	0.0558697	0.0964971	0.0143685	0.0482571	0.0415523	0.0349905	0.0742356	0.0706347	0.0707983	0.0794968	0.0583044	0.0620423	0.112072	0.0387687	0.0458638	0.0488197	0.039809	0.0773638	0.0494707	0.0446504	0.039373	0.0699448	0.0547896	0.0401423	0.0149691	0.06256	0.127618	0.0255843	0.0614725	0.0373551	0.0780928
SCH79797	0.0287982	0.062073	0.0548842	0.0483495	0.0879263	0.0271286	0.0181935	0.0203394	0.0682548	0.135641	0.187857	0.0373391	0.0754236	0.00969901	0.114567	0.24016	0.081067	0.0442273	0.0411314	0.20467	0.0120423	0.0302821	0.0876399	0.102158	0.0695614	0.0319823	0.0922594	0.0670223	0.0899667	0.140665	0.0576085	0.0555693	0.0370936	0.0441096	0.0453946	0.0786392	0.027128	0.0289068	0.0172251	0.0565211	0.13915	0.0604523	0.100242	0.0388446	0.0654253	0.133156	0.0585441	0.0892197	0.0300008
SELUMETINIB	0.0325479	0.0874709	0.132799	0.0869344	0.0521943	0.081312	0.0443542	0.0431293	0.0248061	0.0480122	0.0258683	0.043033	0.0676868	0.0263647	0.0551591	0.0625492	0.110999	0.12671	0.105327	0.0947835	0.0280373	0.0368765	0.0648651	0.0734984	0.0339111	0.188966	0.0287182	0.189015	0.0957984	0.0354252	0.032417	0.127285	0.0611265	0.0563941	0.0427304	0.0330703	0.0223567	0.0450187	0.0445048	0.0592944	0.0616885	0.068288	0.0399386	0.0441985	0.0853015	0.0814469	0.060762	0.0406196	0.060243
SERDEMETAN	0.0367294	0.102423	0.0489636	0.0608595	0.0351976	0.0597399	0.0249824	0.0664734	0.0355165	0.100439	0.0281568	0.0556218	0.0561667	0.041687	0.0459423	0.0280879	0.0634275	0.0610001	0.0675521	0.195104	0.0372799	0.0416839	0.114361	0.0807298	0.0214943	0.0320325	0.0263536	0.102439	0.0521247	0.0493133	0.0304631	0.115208	0.0541875	0.0721471	0.0670257	0.0347586	0.0374339	0.0649463	0.0490778	0.0798655	0.0834789	0.115255	0.0453392	0.0466853	0.10707	0.0521458	0.0676609	0.065068	0.0545209
SGX523	0.0647004	0.0599962	0.0361337	0.0495858	0.0484962	0.0725805	0.0266978	0.047457	0.0344296	0.0230311	0.0100142	0.0693988	0.0365311	0.106435	0.0157426	0.0106669	0.0146194	0.0469232	0.0717917	0.0384368	0.0788669	0.0673384	0.0309836	0.0303624	0.0217089	0.0371293	0.0149124	0.0274723	0.0261417	0.0267869	0.0282099	0.0964996	0.0927387	0.0735643	0.0411573	0.0176384	0.0313619	0.0918782	0.0876187	0.0695805	0.0398614	0.0528281	0.0398742	0.0928805	0.0211419	0.0403839	0.0788365	0.0335504	0.0558332
SID26681509	0.0242942	0.1875	0.0255	0.0688366	0.0396376	0.0743665	0.0142752	0.0978179	0.0282217	0.046172	0.0180167	0.0544617	0.0748401	0.0182739	0.0373888	0.0338413	0.0354739	0.0545712	0.085072	0.607061	0.0212035	0.0294821	0.0445663	0.0808519	0.0236026	0.0286199	0.0159122	0.220554	0.0646321	0.061077	0.0281353	0.102532	0.048133	0.0436214	0.0307646	0.0233678	0.0165425	0.0339084	0.0333882	0.06251	0.083865	0.0586119	0.107063	0.036797	0.0866446	0.0997769	0.0462706	0.128083	0.0733416
SILDENAFIL	0.0442406	0.0253762	0.10048	0.0390159	0.0604149	0.0252758	0.082133	0.0251691	0.0461884	0.0798316	0.299771	0.0393371	0.0467933	0.00797724	0.135279	0.24285	0.100877	0.0776714	0.0543461	0.0262781	0.00749812	0.0337391	0.0391786	0.0277489	0.1187	0.143434	0.139574	0.0376733	0.031682	0.0448886	0.125273	0.0255312	0.0452665	0.0509425	0.0484845	0.148059	0.0994389	0.0266279	0.0174583	0.0454622	0.0819889	0.0363297	0.0135959	0.0413134	0.120667	0.0206323	0.0616851	0.0208765	0.0408387
SIMVASTATIN	0.0538292	0.0465811	0.100222	0.111329	0.0628439	0.0654288	0.044929	0.0423088	0.0566253	0.0717555	0.0562557	0.0548138	0.0557497	0.0348311	0.0620091	0.0760448	0.0754297	0.0720287	0.0507326	0.0490216	0.0504001	0.0688426	0.0887818	0.0461352	0.0484458	0.105569	0.059387	0.0514432	0.0740863	0.0740717	0.0529666	0.0681447	0.075375	0.0567173	0.064154	0.0669629	0.0635331	0.0755842	0.0485166	0.0903931	0.0915911	0.0886161	0.056698	0.0696023	0.0785952	0.0781815	0.0800248	0.0425712	0.0384684
SIROLIMUS	0.0323979	0.0265	0.0629658	0.0472496	0.056629	0.0291413	0.114073	0.0189441	0.0534098	0.130916	0.190466	0.0296933	0.0121776	0.00902876	0.603095	0.287701	0.22772	0.0816593	0.0370642	0.0285345	0.00880181	0.0373753	0.0604637	0.0551615	0.103546	0.0769982	0.141001	0.101623	0.127076	0.0391068	0.0830854	0.0393677	0.0369211	0.0381687	0.0595581	0.127219	0.0486919	0.0225915	0.0156533	0.0528401	0.172085	0.0384431	0.00866504	0.0462371	0.0824876	0.0129724	0.0515733	0.0187768	0.0263192
SITAGLIPTIN	0.0628984	0.017352	0.00672118	0.0231275	0.0436004	0.0737766	0.00730717	0.0683403	0.0171291	0.00857357	0.00192144	0.129502	0.0251501	0.143057	0.00583175	0.00291529	0.00398888	0.0229471	0.11048	0.0368599	0.0575779	0.0369662	0.00944395	0.0324025	0.00613395	0.0131188	0.00406759	0.0230227	0.0146964	0.0175662	0.0108537	0.0385605	0.104679	0.0445978	0.0459972	0.00915667	0.01186	0.118318	0.110508	0.057071	0.0276397	0.0419581	0.0178082	0.0716407	0.00871076	0.0175354	0.0557421	0.022324	0.0970192
SJ172550	0.0767641	0.0272881	0.0109579	0.0255718	0.0448196	0.0745283	0.0238422	0.0750013	0.0403151	0.0233226	0.009991	0.0875626	0.0208917	0.0931616	0.0123797	0.0106572	0.00974435	0.0286487	0.0425833	0.0256915	0.0833777	0.0902096	0.0246757	0.0694741	0.0234879	0.0133985	0.013774	0.025165	0.0314122	0.0374365	0.0236996	0.0586817	0.0921155	0.0903338	0.055974	0.0192197	0.0302782	0.0979943	0.0622281	0.0474399	0.0363245	0.0545936	0.0318523	0.078444	0.0146297	0.0288216	0.0679258	0.0298183	0.0643267
SN38	0.0564115	0.0427486	0.0859423	0.0536063	0.0596106	0.0755302	0.0420436	0.0199967	0.0479765	0.0539556	0.0384475	0.0581206	0.07548	0.0589566	0.0388193	0.0384406	0.0313038	0.103252	0.0548788	0.0461517	0.0323601	0.0489801	0.0808475	0.0720009	0.0379886	0.058766	0.0812834	0.0325201	0.0292185	0.0285856	0.0424246	0.138095	0.0617957	0.064445	0.0484939	0.0367629	0.0304154	0.0454631	0.0568588	0.0592194	0.0713943	0.0492739	0.0427771	0.0773739	0.0793158	0.0521619	0.0802324	0.0293769	0.0323295
SORAFENIB	0.0423383	0.143902	0.0564151	0.093783	0.0322411	0.0602561	0.0297365	0.024514	0.0234697	0.0343115	0.0195066	0.0859373	0.127811	0.0477187	0.0260945	0.0381842	0.0481118	0.148323	0.0553664	0.0563992	0.0249942	0.0373155	0.0210074	0.143298	0.020281	0.0497023	0.0185903	0.0601886	0.0998874	0.0371369	0.0308166	0.0847018	0.0498433	0.0447663	0.0329522	0.02479	0.0239299	0.0342848	0.0447608	0.0599546	0.0486953	0.0549372	0.0607787	0.0455166	0.0406914	0.0598586	0.050229	0.142332	0.0371699
SRT1720	0.0771147	0.0504677	0.0220788	0.0562667	0.0524007	0.0687959	0.0508686	0.0574692	0.0391023	0.0960608	0.149754	0.0818178	0.0216677	0.0163581	0.0829135	0.160176	0.122795	0.053407	0.032518	0.0763564	0.0209783	0.0450732	0.0743805	0.0976613	0.0573645	0.0194499	0.0621425	0.0685932	0.104417	0.0760034	0.0502389	0.0427627	0.0519457	0.0992546	0.0786737	0.0953992	0.0676295	0.0484186	0.0199064	0.0624786	0.089945	0.0728703	0.0248546	0.0419989	0.0902811	0.0292336	0.0569169	0.0470702	0.0512659
STAUROSPORINE	0.0448595	0.0179177	0.0620347	0.0253984	0.0601937	0.00973486	1.01547	0.0371326	0.0926584	0.0457768	0.289348	0.028175	0.0122472	0.00790177	0.0915297	0.0858221	0.0719098	0.0383609	0.0240742	0.00598843	0.0171537	0.049664	0.0287889	0.0196577	0.261924	0.0532614	0.317123	0.0227978	0.0224784	0.0303991	0.21887	0.0235533	0.037253	0.0443823	0.0580448	0.0860434	0.08711	0.0234667	0.0164589	0.0368921	0.0418782	0.0322839	0.00654895	0.0412981	0.0428355	0.00689297	0.0494121	0.0140356	0.0298295
SU11274	0.0537009	0.0616875	0.0758921	0.0942538	0.0366532	0.07453	0.0506046	0.0515969	0.0540172	0.0888436	0.0377129	0.0732035	0.0659145	0.0498089	0.0559062	0.0440981	0.0794367	0.0626978	0.0809063	0.0554294	0.049262	0.0646885	0.0854208	0.0562239	0.0379434	0.0706471	0.0449895	0.0894299	0.078073	0.0338805	0.0389396	0.0889005	0.0777955	0.0533279	0.062575	0.0564028	0.056144	0.0539085	0.0735925	0.0618009	0.0483279	0.084075	0.0358503	0.0617038	0.0982644	0.0403849	0.083385	0.0575838	0.061234
SUNITINIB	0.0440891	0.101345	0.0879479	0.0867098	0.0486245	0.0944134	0.0154504	0.0500684	0.0379526	0.0409895	0.0105143	0.0671876	0.128184	0.09992	0.0147714	0.0157072	0.0214553	0.0437433	0.0725737	0.0744232	0.0722634	0.0447357	0.0425249	0.0389102	0.0174968	0.0498824	0.0136375	0.0361522	0.04716	0.0316833	0.0242918	0.123756	0.0584466	0.0697729	0.051541	0.0182441	0.0383889	0.0768262	0.100646	0.089333	0.0347719	0.0945263	0.0739033	0.0699682	0.0462093	0.0738595	0.0640847	0.0608143	0.044453
TACEDINALINE	0.0459637	0.0488133	0.0464351	0.0414972	0.0752847	0.062449	0.0859698	0.0426805	0.0790379	0.140714	0.166026	0.0338373	0.0343859	0.0110985	0.162799	0.149486	0.151659	0.0502261	0.0361484	0.0640861	0.0160296	0.0363861	0.300636	0.0830375	0.101021	0.0610272	0.233227	0.0937898	0.0743544	0.0781623	0.0706969	0.0711303	0.0436183	0.0507772	0.0594124	0.0975502	0.0466907	0.0253017	0.020076	0.0449635	0.235804	0.0484443	0.0260021	0.0391886	0.194772	0.0450929	0.0581231	0.0252492	0.0380725
TACROLIMUS	0.0749591	0.0510117	0.0670442	0.0673381	0.0584782	0.0522248	0.0425444	0.0640141	0.0508724	0.0680089	0.0393564	0.0876108	0.0441027	0.0294259	0.0408274	0.0443891	0.0439019	0.0499131	0.102067	0.0664429	0.0561419	0.0558802	0.0887326	0.0444961	0.0495812	0.0601325	0.041932	0.0477054	0.0407287	0.06793	0.0347501	0.0732328	0.0898334	0.0684336	0.0618894	0.0369362	0.0434628	0.0888995	0.0584993	0.0759735	0.0707598	0.115075	0.0830569	0.0684874	0.051834	0.0856553	0.0819113	0.0479992	0.0862672
TAMOXIFEN	0.0590916	0.0429214	0.0384092	0.0865399	0.0547393	0.086535	0.0208403	0.0923445	0.0353352	0.0272327	0.0106474	0.0753719	0.0370404	0.0949212	0.0206777	0.0170382	0.0251722	0.0407807	0.128254	0.0664648	0.0628712	0.0822547	0.0471913	0.0586004	0.0188046	0.0551121	0.015552	0.0596859	0.0426924	0.0411491	0.0232198	0.0681513	0.100724	0.0603421	0.063851	0.030802	0.0283413	0.142333	0.0960104	0.101501	0.0460986	0.0855368	0.0513478	0.0586467	0.0375686	0.0588735	0.0598406	0.0534322	0.10832
TANDUTINIB	0.0416492	0.0261747	0.0610677	0.0686256	0.0798144	0.0254844	0.0538843	0.039844	0.0683979	0.0861622	0.0687767	0.0517667	0.0301591	0.0198615	0.0700951	0.0656485	0.0892639	0.0371228	0.10274	0.0394007	0.0471794	0.0574514	0.0783113	0.030341	0.0819417	0.0652177	0.0749744	0.0573634	0.0420838	0.0447294	0.0691855	0.0418461	0.0639353	0.0502445	0.0883598	0.096371	0.0609529	0.0572235	0.0506237	0.0857043	0.049461	0.0790691	0.0192951	0.0747856	0.0532462	0.0261154	0.0610421	0.0397794	0.0748085
TANESPIMYCIN	0.0542881	0.10289	0.0351499	0.0870866	0.0574097	0.073698	0.0203668	0.0962743	0.0546285	0.0541197	0.0110778	0.0621464	0.0866462	0.0800719	0.0249593	0.0108912	0.0333216	0.0329462	0.0939369	0.126903	0.0524393	0.0646346	0.0351373	0.024942	0.0202339	0.0313804	0.0165398	0.100829	0.0434116	0.0685413	0.0299156	0.0980594	0.0723151	0.0648426	0.0518085	0.0220723	0.0231017	0.0803986	0.0728955	0.0871505	0.0373238	0.0800378	0.121952	0.0566364	0.0544383	0.10458	0.0673754	0.138096	0.0784327
TEMOZOLOMIDE	0.0311616	0.0168993	0.117035	0.0436846	0.0513541	0.0285799	0.0120545	0.0117884	0.0233462	0.0119817	0.00467712	0.0446835	0.0428313	0.0740766	0.00880927	0.00860745	0.00688809	0.0493561	0.154442	0.0127814	0.0529319	0.0371248	0.0144397	0.0179139	0.0164805	0.152609	0.0119099	0.012156	0.0114542	0.010078	0.0167068	0.05735	0.0765211	0.0499588	0.0366668	0.0172844	0.0148896	0.0602801	0.11411	0.0595378	0.0275725	0.0419358	0.0295573	0.0985815	0.012567	0.0365734	0.0721461	0.01587	0.0356333
TEMSIROLIMUS	0.0440799	0.0490507	0.0270916	0.0732904	0.0461772	0.05797	0.0507251	0.0276618	0.0383894	0.188468	0.311819	0.0321585	0.0292373	0.00713233	0.460769	0.881694	0.317962	0.0904028	0.0196743	0.0764973	0.00668623	0.0408526	0.0605016	0.153581	0.0720627	0.0392618	0.0917744	0.183373	0.483942	0.0936432	0.0658597	0.0290297	0.0372879	0.0377999	0.06239	0.141562	0.0683754	0.0175938	0.0121548	0.0410511	0.095376	0.0401813	0.0195396	0.0233919	0.172747	0.0198756	0.042509	0.0727682	0.038213
TENIPOSIDE	0.0464154	0.0356052	0.0434934	0.0479276	0.0631866	0.0503353	0.0394983	0.0467804	0.0755692	0.0501453	0.0611589	0.0500493	0.0769837	0.0277105	0.0382645	0.0372391	0.043085	0.0509271	0.0506827	0.0451244	0.0527504	0.0625293	0.0831502	0.0875418	0.0622466	0.0320439	0.0686191	0.0716538	0.0281599	0.0423267	0.0592595	0.0657641	0.0518883	0.0476092	0.064086	0.0437241	0.0408956	0.0467238	0.0359334	0.0524254	0.0452207	0.054469	0.0446412	0.0480414	0.0616745	0.0573343	0.0482171	0.0436594	0.0663906
TG100115	0.064194	0.0344101	0.0116809	0.0265638	0.0626658	0.0804433	0.0135835	0.0897925	0.0280834	0.0168619	0.00548022	0.173653	0.036223	0.114333	0.0144301	0.00667702	0.0103128	0.0263811	0.134174	0.0473999	0.07708	0.056344	0.017751	0.0445494	0.0126029	0.0159247	0.00845614	0.0498212	0.0274275	0.0256648	0.022114	0.0383293	0.106055	0.0475748	0.0595999	0.0204459	0.0245313	0.0905865	0.110964	0.065393	0.0355173	0.0530593	0.021596	0.0692813	0.0131868	0.0236103	0.0649631	0.0378998	0.158512
TG101348	0.0380535	0.0688736	0.0323387	0.0649215	0.053649	0.0743947	0.0497969	0.0561651	0.0556256	0.130862	0.0702444	0.0335358	0.0502172	0.0134767	0.122776	0.078489	0.335444	0.0385927	0.0346607	0.111434	0.0325131	0.0461966	1.37203	0.0560118	0.0329248	0.0441969	0.0851174	0.310125	0.126254	0.0881016	0.0298546	0.0601746	0.0372525	0.0470599	0.059868	0.0537065	0.0576122	0.0328813	0.0241911	0.0551484	0.0499238	0.0724681	0.025042	0.0291617	0.193184	0.0393995	0.0462806	0.0573577	0.0519149
TGX221	0.0418756	0.0817137	0.0614706	0.0648207	0.0645149	0.066	0.0529925	0.0666267	0.0700033	0.147299	0.0880537	0.0383897	0.0648786	0.0199366	0.186125	0.0600767	0.232534	0.0578185	0.0447154	0.102774	0.0236735	0.0456487	0.101942	0.0486684	0.0657763	0.0517904	0.0567045	0.221731	0.141486	0.0436199	0.0752028	0.0978295	0.0453073	0.0600616	0.0853328	0.0531505	0.0650176	0.0364519	0.0388264	0.0602697	0.0687286	0.0626903	0.0283735	0.0389614	0.171633	0.0337036	0.0688169	0.0483185	0.0457349
THALIDOMIDE	0.0850222	0.0545509	0.0526428	0.0680442	0.187492	0.0450393	0.0419453	0.0860324	0.262668	0.0601823	0.0458856	0.0651079	0.0455966	0.0699062	0.0381881	0.0341683	0.0387373	0.0339802	0.0546532	0.0423487	0.0877696	0.0700385	0.0484115	0.0331255	0.147357	0.0363063	0.0374432	0.0461315	0.0477727	0.0615097	0.224949	0.0570769	0.0747686	0.0736925	0.0780004	0.0704313	0.0623903	0.071387	0.0634276	0.090234	0.057578	0.0711401	0.0556742	0.0862953	0.0519789	0.0645292	0.0607159	0.0576609	0.0565027
TIGECYCLINE	0.04562	0.162232	0.0258543	0.057557	0.0395966	0.098386	0.013477	0.0402121	0.0326216	0.0368533	0.0256762	0.0485891	0.188834	0.0327331	0.0180462	0.0485156	0.0198719	0.0473201	0.0253104	0.123152	0.0255309	0.0447753	0.023462	0.113623	0.0242811	0.0163747	0.0148689	0.0392648	0.132834	0.0708831	0.0238092	0.0687108	0.0498744	0.0426104	0.0405031	0.0221844	0.0280788	0.041735	0.0246818	0.0489756	0.0464829	0.0450633	0.10946	0.0391065	0.0398423	0.0670316	0.0461605	0.206433	0.0302449
TIPIFARNIBP2	0.0353319	0.0531871	0.0146545	0.0657092	0.0641961	0.0506871	0.0199851	0.0472798	0.0350524	0.048993	0.0132927	0.0866002	0.0212847	0.0395795	0.0583571	0.0332653	0.0389489	0.0383039	0.105805	0.120436	0.0241331	0.0504168	0.0463021	0.104128	0.0193585	0.0245948	0.0169252	0.114059	0.100752	0.0867611	0.0267658	0.0535649	0.0838987	0.0618377	0.0573147	0.0417419	0.0167671	0.0706503	0.04625	0.102682	0.102775	0.072606	0.0482655	0.0750472	0.0289506	0.0539106	0.0725116	0.103387	0.0868688
TIVANTINIB	0.0899154	0.0480083	0.0611957	0.0514686	0.0758732	0.0644721	0.0322283	0.0513922	0.0483679	0.0592521	0.0344857	0.0788134	0.0556141	0.0615541	0.0365443	0.0443223	0.024719	0.0536663	0.0769851	0.0671702	0.0420058	0.077316	0.0356566	0.0546408	0.039459	0.0420754	0.0399168	0.0288296	0.04124	0.0634701	0.0359336	0.0642483	0.0901226	0.0753979	0.0758116	0.0381705	0.0399277	0.0740883	0.0868332	0.0846123	0.0607331	0.0684392	0.0451554	0.0793116	0.036384	0.0576719	0.0744564	0.0472811	0.0695178
TIVOZANIB	0.0518611	0.104722	0.0288971	0.115465	0.0361059	0.126562	0.0564875	0.0536656	0.0218718	0.0866728	0.031977	0.0591675	0.0268209	0.0266146	0.13146	0.0748571	0.270918	0.147454	0.062175	0.154021	0.0196022	0.0490094	0.0837787	0.135858	0.0232309	0.0567828	0.035745	0.369549	0.176568	0.0524285	0.0318827	0.0886463	0.0604964	0.0452565	0.0497743	0.0509603	0.0324596	0.0448744	0.0336703	0.0703642	0.0960139	0.0623593	0.022968	0.0399814	0.109862	0.0371491	0.0536882	0.0662171	0.0642888
TOPOTECAN	0.0424194	0.0403302	0.0569505	0.0383076	0.060075	0.0276875	0.297246	0.0323495	0.0582813	0.0596426	0.195393	0.0384821	0.0222207	0.0111357	0.0919146	0.128099	0.0946808	0.0526824	0.0292473	0.016856	0.0228025	0.0457455	0.104275	0.0959133	0.107083	0.0550777	0.616803	0.046622	0.0286134	0.0331659	0.108314	0.0371732	0.0324083	0.0405377	0.0649844	0.087738	0.0955336	0.0213536	0.0198583	0.050233	0.087632	0.0444722	0.0153796	0.0449798	0.0848231	0.024689	0.0460394	0.023389	0.038462
TOSEDOSTAT	0.0348933	0.137284	0.0435884	0.0862806	0.0317052	0.0647449	0.0137883	0.0514435	0.0412925	0.0779705	0.0956127	0.0339644	0.177954	0.0140884	0.0358205	0.176676	0.055474	0.0627411	0.027356	0.232384	0.0209891	0.0434988	0.0425249	0.138523	0.0384183	0.0257417	0.0278951	0.0695485	0.132617	0.101002	0.0365027	0.0597196	0.0379093	0.0389821	0.0430593	0.0485849	0.0427144	0.0308731	0.0215408	0.0504849	0.0575921	0.057054	0.114855	0.0252162	0.104206	0.0785533	0.0427106	0.151778	0.0385133
TPCA1	0.0390359	0.24892	0.058085	0.0983444	0.0298177	0.0827785	0.0152673	0.0355619	0.0242901	0.0262458	0.00747337	0.0604663	0.143422	0.0616213	0.0186774	0.0167412	0.0309745	0.051384	0.0517027	0.0869615	0.0387684	0.0471241	0.0278956	0.0588638	0.0105374	0.0424431	0.0128732	0.0610389	0.105389	0.0303262	0.0146726	0.104393	0.0471783	0.0508651	0.0326524	0.0124482	0.0237351	0.0449772	0.0679753	0.0654206	0.0258864	0.0465317	0.0821123	0.0449393	0.0378825	0.0635449	0.0500592	0.244886	0.0418832
TRAMETINIB	0.0523932	0.0250926	0.0337598	0.0443423	0.0240472	0.0567955	0.0139959	0.051037	0.0292494	0.0103199	0.00330897	0.0702643	0.0328742	0.162869	0.00449949	0.00364066	0.0055018	0.0215669	0.0658932	0.0118456	0.130399	0.060807	0.0139942	0.0230631	0.0106306	0.0310249	0.00656812	0.0126032	0.0145704	0.0115882	0.0137286	0.0652755	0.0674461	0.066053	0.0330893	0.00693325	0.0246712	0.10524	0.128462	0.0493502	0.0195319	0.0494927	0.0312747	0.0834269	0.0130887	0.0258946	0.0569826	0.024818	0.0397457
TRETINOIN	0.0587455	0.0449537	0.0996229	0.0850752	0.0502055	0.0421987	0.0702663	0.0998672	0.0719062	0.0892029	0.159296	0.0649306	0.0593071	0.0201861	0.0729623	0.083007	0.0959485	0.0592343	0.0453554	0.0475735	0.0305696	0.0366681	0.0642718	0.043041	0.110868	0.0684545	0.086797	0.0515666	0.0487939	0.0687131	0.10979	0.0498464	0.0482177	0.0756707	0.0541985	0.0883778	0.0850226	0.037	0.0343786	0.0647765	0.096607	0.0629314	0.0650238	0.0576816	0.138847	0.0681356	0.0724162	0.0335334	0.0410287
TRIFLUOPERAZINE	0.0324968	0.0731292	0.0333397	0.0861623	0.0555752	0.0617738	0.0119838	0.0322194	0.0191598	0.0551833	0.012874	0.0602145	0.0509784	0.0465904	0.0311608	0.0268131	0.0321307	0.0607958	0.131542	0.214929	0.0279184	0.0354084	0.0849145	0.0596485	0.0152148	0.0430695	0.0161589	0.0653906	0.0471297	0.0350967	0.0184202	0.107958	0.0666054	0.0691636	0.0534157	0.0265972	0.0196193	0.0734049	0.0498484	0.125606	0.0963856	0.126562	0.047158	0.0466654	0.052021	0.0669279	0.0648986	0.0462455	0.0439077
TRIPTOLIDE	0.0521565	0.0431118	0.0464805	0.0340273	0.0502513	0.0417214	0.575188	0.0502903	0.0371075	0.0332564	0.025897	0.0613942	0.0182931	0.0585859	0.0305933	0.028056	0.0284143	0.0627826	0.0642128	0.0206645	0.0406541	0.0709786	0.0236435	0.0585147	0.0463869	0.0446718	0.110759	0.030314	0.0248347	0.0249897	0.0570893	0.0622238	0.0680088	0.0817147	0.0676897	0.032548	0.0403799	0.0579904	0.0500119	0.066254	0.0657182	0.0543832	0.0156893	0.0778585	0.03326	0.0139502	0.07934	0.0304594	0.0567072
TUBASTATINA	0.0419813	0.0706769	0.051441	0.0663568	0.0536179	0.0855982	0.0456588	0.0473159	0.0677091	0.095553	0.0457257	0.038729	0.0485908	0.0175621	0.0932553	0.0582282	0.10168	0.0608728	0.050683	0.118811	0.0159994	0.0411821	0.279518	0.107884	0.0368379	0.0862894	0.0952208	0.133405	0.0729061	0.0647304	0.034256	0.110885	0.048797	0.0579013	0.0635828	0.0562809	0.0385473	0.0364809	0.0284176	0.0537134	0.15318	0.0749339	0.0485811	0.0420534	0.307593	0.0806869	0.0669567	0.0395567	0.0436602
TW37	0.0380442	0.0560273	0.0428917	0.0358648	0.0570676	0.0451851	0.0251018	0.0274986	0.0492531	0.0315413	0.013749	0.04397	0.0313062	0.0378378	0.0277064	0.0336807	0.0142074	0.0473699	0.0632542	0.0710183	0.0296885	0.0324798	0.0504695	0.0986998	0.0234905	0.0319859	0.0375362	0.0366831	0.0321222	0.0630596	0.0276236	0.0911612	0.0561075	0.0558236	0.0347877	0.0195085	0.0141477	0.0427575	0.0432921	0.0549949	0.0847736	0.0530261	0.0631445	0.0643987	0.0649535	0.0711254	0.0778938	0.058746	0.0372482
UNC0321	0.0476304	0.0388146	0.305763	0.0659247	0.0625621	0.0302854	0.0876288	0.0303065	0.0646557	0.0514172	0.0954147	0.027933	0.0278289	0.0121862	0.0745377	0.173962	0.063586	0.0558706	0.060059	0.0158625	0.0277749	0.0929932	0.0434814	0.0313649	0.106308	0.323259	0.10321	0.0346576	0.0357429	0.0336905	0.072198	0.0313263	0.0422304	0.0423966	0.0445246	0.0677489	0.0732182	0.0409104	0.0377773	0.0510745	0.0329328	0.0356032	0.017293	0.0439225	0.0558747	0.028714	0.0512504	0.0227188	0.0544476
VALDECOXIB	0.0340396	0.142911	0.0298838	0.0860475	0.0507975	0.0826229	0.0214344	0.0377198	0.034909	0.0463274	0.0212617	0.0510224	0.0688576	0.0327885	0.100757	0.0675552	0.0492955	0.10522	0.050613	0.18717	0.0183308	0.0344166	0.0427973	0.213658	0.02193	0.0492075	0.0239586	0.21865	0.222021	0.0478264	0.0350208	0.0850612	0.071169	0.0331153	0.038582	0.0321161	0.0219668	0.0335085	0.0382204	0.0738589	0.122112	0.0447999	0.0496869	0.0553113	0.0744348	0.0518459	0.0614385	0.10866	0.049302
VELIPARIB	0.0450692	0.0229883	0.0354438	0.0310251	0.0582642	0.0257521	0.0588273	0.093885	0.0507769	0.0741055	0.208002	0.0374635	0.0280689	0.00595687	0.151243	0.187128	0.103366	0.0344475	0.040046	0.0522319	0.0115124	0.0408122	0.0370997	0.0295477	0.0919399	0.0512133	0.123461	0.115163	0.0352209	0.0633788	0.110627	0.0137238	0.037391	0.0313778	0.0675155	0.198127	0.106471	0.0225843	0.0196403	0.0503234	0.0513508	0.0342619	0.0084293	0.0365473	0.130278	0.0113401	0.0408178	0.0286503	0.106457
VER155008	0.0313621	0.023684	0.0514841	0.0575286	0.0477795	0.0186387	0.0607969	0.0154708	0.0530667	0.0808887	0.142309	0.0389555	0.0184468	0.00821195	0.227082	0.297865	0.202794	0.0491621	0.0338893	0.0141622	0.0118617	0.0364751	0.0482502	0.0538753	0.0718613	0.0748312	0.0949972	0.124121	0.107174	0.048748	0.0711803	0.0196788	0.0311771	0.0380008	0.0659296	0.184894	0.0641557	0.018562	0.0182328	0.0644969	0.0506956	0.0396056	0.010366	0.0416523	0.0619175	0.0143146	0.0574202	0.0471155	0.0448605
VINCRISTINE	0.0746845	0.0399034	0.0254931	0.0372658	0.0478638	0.0617128	0.0177058	0.144529	0.0750672	0.0184939	0.00740476	0.112534	0.0406653	0.118827	0.0107789	0.00773136	0.00949933	0.0183609	0.0625594	0.0397739	0.19437	0.0985557	0.0247846	0.0447962	0.0230084	0.015661	0.0114466	0.0410436	0.0255747	0.0278035	0.0278551	0.0461781	0.0845763	0.0572757	0.0759449	0.0204053	0.0346978	0.0977165	0.120602	0.0681306	0.0319696	0.065393	0.0542493	0.0815718	0.0166712	0.0414484	0.0543665	0.0597236	0.0893321
VORINOSTAT	0.0466794	0.0454743	0.0492558	0.0623705	0.0607688	0.0591954	0.0481159	0.0516118	0.0846979	0.0511549	0.0332004	0.0509431	0.0488271	0.0245907	0.0306287	0.0259562	0.0570369	0.045958	0.0489933	0.0647892	0.0698755	0.0443952	0.583872	0.0537948	0.0354958	0.0640273	0.0587302	0.0530757	0.026636	0.0667412	0.0353789	0.0697843	0.0531305	0.0612606	0.0595476	0.0339293	0.04235	0.0508223	0.0421008	0.0636852	0.0714641	0.081882	0.0618442	0.054624	0.0969489	0.0853612	0.0676611	0.0361452	0.0494221
WZ4002	0.0405292	0.117181	0.025215	0.137702	0.0386776	0.166855	0.0330476	0.0533788	0.0253231	0.0911139	0.0368912	0.050747	0.0439463	0.0309531	0.0870068	0.0944779	0.234156	0.0920129	0.0512341	0.180843	0.0197797	0.0448058	0.0891085	0.0985301	0.0216624	0.0456028	0.0226159	0.190941	0.185474	0.0796648	0.0287835	0.0767456	0.0596058	0.0532087	0.0620106	0.0563445	0.0487783	0.0467127	0.0288461	0.0591572	0.078477	0.0797732	0.0406909	0.0252888	0.15771	0.0482045	0.0580341	0.0723219	0.0453849
YK4279	0.0755213	0.0411534	0.0802491	0.0599938	0.0786987	0.0596962	0.0452114	0.0719849	0.0676075	0.064407	0.0481583	0.0755765	0.066982	0.0631782	0.0475142	0.0466371	0.0473589	0.0606094	0.0722901	0.0452745	0.057088	0.0647335	0.0441425	0.044473	0.062456	0.0527005	0.0519774	0.0438551	0.0556428	0.0578169	0.0534385	0.0774851	0.083689	0.0797754	0.0585521	0.080003	0.0546169	0.0827728	0.0844472	0.0707027	0.057854	0.0652115	0.0469277	0.0772934	0.0408588	0.0457265	0.0983706	0.0442879	0.0494175
YM155	0.0405096	0.0581356	0.0351166	0.0295355	0.0726755	0.0496785	0.0152134	0.0399046	0.083503	0.0743857	0.122622	0.0303113	0.0787021	0.0138129	0.0350664	0.122985	0.0277013	0.0236949	0.0293755	0.113824	0.0242131	0.0469755	0.0876444	0.0797842	0.0606002	0.01564	0.0793623	0.0199822	0.0398666	0.130184	0.0535071	0.0567936	0.03857	0.0530538	0.0429385	0.0420433	0.0471032	0.0423868	0.0200634	0.0380176	0.0786534	0.0542648	0.0930143	0.0359931	0.0549974	0.101666	0.0493141	0.0538782	0.0288839
ZEBULARINE	0.0694923	0.0552691	0.113716	0.0535483	0.0680483	0.0622181	0.0357515	0.0483804	0.0613095	0.0435298	0.0349577	0.0613071	0.0775872	0.0567255	0.024404	0.0431076	0.0286637	0.042944	0.0649333	0.0282229	0.0666194	0.0766415	0.0484453	0.045975	0.0328759	0.129628	0.0445907	0.0231193	0.0340271	0.0331926	0.0440902	0.0524621	0.0587336	0.0631697	0.0688578	0.049385	0.0870226	0.082399	0.0849058	0.0552931	0.0576316	0.0643828	0.0475604	0.0785462	0.0571528	0.0642374	0.0697547	0.0423882	0.0583612
ZSTK474	0.0405956	0.0251716	0.0542297	0.0320311	0.0680929	0.0475192	0.0446358	0.0229891	0.0388419	0.136782	0.136526	0.0348111	0.0412842	0.0130971	0.439455	0.0987087	0.189733	0.21944	0.0641675	0.0685209	0.0092356	0.0275582	0.0502163	0.04769	0.0631508	0.058487	0.0766221	0.0992493	0.122217	0.0341996	0.0604925	0.0623883	0.0465145	0.0459294	0.0469378	0.0546183	0.039716	0.0257956	0.0277046	0.0546032	0.103728	0.0394048	0.0119676	0.0387631	0.055273	0.0163011	0.0552113	0.019614	0.028889
[truncated: 190 more columns]

## Sheet: C) Sensitivity(CTRPv2)
	ABIRATERONE	ABT737	AC55649	AFATINIB	AGK2	ALISERTIB	ALVOCIDIB	AM580	APICIDIN	AT7867	AVICIND	AXITINIB	AZACITIDINE	AZD1480	AZD6482	AZD7545	AZD7762	AZD8055	BARASERTIB	BAXCHANNELBLOCKER	BELINOSTAT	BETULINICACID	BI2536	BIBR1532	BIX01294	BLEBBISTATIN	BMS345541	BMS536924	BMS754807	BORTEZOMIB	BOSUTINIB	BRDK01737880	BRDK02492147	BRDK13999467	BRDK14844214	BRDK27224038	BRDK27986637	BRDK33514849	BRDK49290616	BRDK50799972	BRDK55116708	BRDK63431240	BRDK71935468	BRDK86535717	BRDK88742110	BRDK94991378	BRDK96431673	BREFELDINA	BRIVANIB
ABIRATERONE	1.72799	0.0161906	0.019953	0.0142242	0.0146922	0.0186075	0.0218658	0.0302237	0.0171314	0.0103988	0.0508092	0.0252739	0.164567	0.0350808	0.0174017	0.0373326	0.0369216	0.0246218	0.0132392	0.0187757	0.0222121	0.0382297	0.0383282	0.0458292	0.0136561	0.0340132	0.0325043	0.0197756	0.0101097	0.0395519	0.0346544	0.0213685	0.00913001	0.0155988	0.0251538	0.026516	0.0354385	0.0345078	0.0318099	0.00847831	0.0309483	0.0128836	0.0285909	0.0262919	0.167634	0.0265127	0.0269224	0.0524386	0.163336
ABT737	0.0161906	1.90723	0.0530999	0.0326219	0.0781259	0.0922502	0.017269	0.0958507	0.0734057	0.069297	0.0554432	0.0495088	0.0482863	0.0597618	0.062253	0.0542894	0.0369204	0.0369435	0.0600889	0.085703	0.0639515	0.0541171	0.0229621	0.0952799	0.0446279	0.0708659	0.0246921	0.051653	0.0699543	0.0473923	0.0461846	0.291823	0.0712802	0.0790945	0.0512448	0.115921	0.0789758	0.0470485	0.0977389	0.0520292	0.0322652	0.0366045	0.058021	0.0937494	0.0648778	0.0606137	0.0612863	0.043194	0.0314124
AC55649	0.019953	0.0530999	1.58206	0.0381712	0.057037	0.0440083	0.0224364	0.052065	0.0433543	0.0508679	0.0827356	0.0379138	0.0635015	0.099814	0.0510882	0.0519505	0.029827	0.0434705	0.0499824	0.0520195	0.0392384	0.052001	0.0236443	0.0679237	0.0474421	0.0575208	0.0304494	0.0327697	0.0433463	0.0381856	0.0383135	0.022315	0.106833	0.0639283	0.0587916	0.110349	0.103518	0.0508655	0.157213	0.0497556	0.0407143	0.0407577	0.0711731	0.114292	0.0387315	0.0534902	0.100882	0.0252043	0.0329521
AFATINIB	0.0142242	0.0326219	0.0381712	2.61344	0.0624544	0.0330695	0.0231279	0.0346586	0.0339331	0.0248864	0.0274485	0.00988071	0.0359748	0.0254598	0.0482937	0.0206083	0.0477628	0.0310383	0.0313327	0.0538813	0.0251471	0.0260934	0.0175375	0.0316232	0.0280265	0.0496569	0.0552477	0.0585075	0.0355407	0.0241224	0.453279	0.0246567	0.0345351	0.0312036	0.0341808	0.0769395	0.0584819	0.0575155	0.0446168	0.0432381	0.0503435	0.0742146	0.0277461	0.0324459	0.0243797	0.0229376	0.0370963	0.0606617	0.0144094
AGK2	0.0146922	0.0781259	0.057037	0.0624544	1.66273	0.0413429	0.0167986	0.0857825	0.0506634	0.0276795	0.084185	0.0398966	0.0752043	0.0400993	0.0436687	0.0488664	0.0339844	0.0250504	0.0279061	0.0475998	0.0202856	0.0951716	0.0204523	0.0988418	0.0465777	0.0450679	0.0301647	0.0469529	0.0339666	0.0399365	0.0667213	0.0527358	0.0709236	0.0455165	0.113888	0.0416466	0.131956	0.0614691	0.0635849	0.0547599	0.062346	0.0474962	0.0652674	0.0793466	0.050537	0.083016	0.0965464	0.0314263	0.0324366
ALISERTIB	0.0186075	0.0922502	0.0440083	0.0330695	0.0413429	3.04669	0.0436833	0.0884002	0.113784	0.114689	0.0695652	0.290849	0.0407978	0.146109	0.0634004	0.0353242	0.0974131	0.086265	0.675567	0.0402759	0.137964	0.0263875	0.203227	0.0946098	0.0411959	0.0203711	0.0588367	0.118737	0.225027	0.0611571	0.0892194	0.921062	0.0239018	0.0376064	0.0361586	0.0451301	0.0221864	0.040798	0.0240303	0.0237945	0.0270891	0.0379484	0.0232889	0.0159025	0.0674636	0.0228833	0.021011	0.0807485	0.0324911
ALVOCIDIB	0.0218658	0.017269	0.0224364	0.0231279	0.0167986	0.0436833	2.68332	0.0150591	0.0755159	0.0606082	0.0179805	0.0464593	0.0199925	0.0324609	0.0294832	0.0526497	0.129988	0.167263	0.0488437	0.0322575	0.1515	0.0237375	0.151621	0.024665	0.0752639	0.0158876	0.590543	0.021335	0.0501305	0.100944	0.053815	0.0284303	0.03348	0.0572834	0.0125258	0.0110301	0.0168649	0.023202	0.0144092	0.00682606	0.0107255	0.0512198	0.0171233	0.0108928	0.0527506	0.01405	0.0112803	0.130441	0.0387688
AM580	0.0302237	0.0958507	0.052065	0.0346586	0.0857825	0.0884002	0.0150591	1.97028	0.064692	0.0481065	0.0728843	0.0688899	0.0560735	0.0445052	0.0755438	0.0623126	0.0383196	0.0401185	0.0465983	0.0418864	0.0284385	0.150488	0.0274012	0.258245	0.0235328	0.0354703	0.0385061	0.0677716	0.0432591	0.0411127	0.0521711	0.0989556	0.0408834	0.0220163	0.0348387	0.0641904	0.035743	0.0435604	0.0446456	0.045786	0.0608583	0.0335431	0.0520114	0.0547796	0.0438906	0.0567141	0.0432699	0.0345092	0.0602805
APICIDIN	0.0171314	0.0734057	0.0433543	0.0339331	0.0506634	0.113784	0.0755159	0.064692	2.39424	0.0638819	0.0397234	0.0473071	0.0332406	0.0801825	0.0627595	0.0334103	0.0767704	0.105034	0.0646072	0.0702282	0.77689	0.0307369	0.0903178	0.065485	0.103745	0.0394449	0.0777364	0.0722876	0.0798836	0.0673261	0.058376	0.0644512	0.0583381	0.0384091	0.0607229	0.0466979	0.119532	0.0298756	0.0718805	0.0217758	0.058389	0.080204	0.0446189	0.077841	0.071625	0.0430005	0.077342	0.0976466	0.0319569
AT7867	0.0103988	0.069297	0.0508679	0.0248864	0.0276795	0.114689	0.0606082	0.0481065	0.0638819	2.09558	0.0634233	0.238673	0.0774639	0.143698	0.0895131	0.0357483	0.13051	0.16188	0.121062	0.0831728	0.0406781	0.0292076	0.0948108	0.0425468	0.106174	0.0309069	0.130613	0.0539342	0.0731716	0.0687267	0.0563057	0.0707272	0.0207297	0.0451706	0.0640387	0.0260182	0.0389503	0.0329269	0.0282956	0.0267961	0.0245706	0.0589528	0.0406305	0.0143138	0.0540323	0.0385237	0.0178972	0.0867105	0.0426272
AVICIND	0.0508092	0.0554432	0.0827356	0.0274485	0.084185	0.0695652	0.0179805	0.0728843	0.0397234	0.0634233	1.53745	0.0621542	0.0484181	0.0585416	0.0633689	0.0821985	0.0391498	0.0427669	0.0466245	0.0387885	0.0273939	0.0834568	0.031846	0.0952503	0.0220491	0.04179	0.0248991	0.0467804	0.0295098	0.0407448	0.035768	0.0478181	0.0327017	0.0514191	0.0521163	0.0335481	0.0433347	0.0474672	0.0393892	0.0365036	0.0594981	0.0391487	0.0811064	0.0332983	0.0385164	0.0735175	0.0340006	0.0278767	0.0419131
AXITINIB	0.0252739	0.0495088	0.0379138	0.00988071	0.0398966	0.290849	0.0464593	0.0688899	0.0473071	0.238673	0.0621542	2.57427	0.0769085	0.208829	0.0326696	0.0473037	0.0917451	0.0981325	0.220991	0.0436322	0.0290358	0.0301234	0.0758191	0.0865323	0.0448709	0.0136819	0.0837301	0.0600592	0.0953277	0.0854507	0.0284029	0.150694	0.0151597	0.0424875	0.0363721	0.0220183	0.0307484	0.0305034	0.0129006	0.0179822	0.023118	0.0285696	0.0259967	0.00796785	0.0436077	0.0267274	0.00906554	0.0631296	0.0826224
AZACITIDINE	0.164567	0.0482863	0.0635015	0.0359748	0.0752043	0.0407978	0.0199925	0.0560735	0.0332406	0.0774639	0.0484181	0.0769085	1.52769	0.0597568	0.0297274	0.0687509	0.0255124	0.0474977	0.0286232	0.0331657	0.0242387	0.0548251	0.0398307	0.0527269	0.0416925	0.0653878	0.0687058	0.0273323	0.0338692	0.0613533	0.0417787	0.0546748	0.0391314	0.0292318	0.0847724	0.0254479	0.0350456	0.0975729	0.0261153	0.0240743	0.0222484	0.0356193	0.0607642	0.0240391	0.0703256	0.0760044	0.0323931	0.0527658	0.0859571
AZD1480	0.0350808	0.0597618	0.099814	0.0254598	0.0400993	0.146109	0.0324609	0.0445052	0.0801825	0.143698	0.0585416	0.208829	0.0597568	1.95429	0.0783782	0.0474241	0.0510306	0.0821275	0.0874405	0.0614357	0.0485107	0.027146	0.0508099	0.0665557	0.0922759	0.0273748	0.0370936	0.0543664	0.181645	0.0434021	0.0327861	0.0228159	0.0333796	0.0369318	0.0591597	0.0206713	0.0286692	0.0524722	0.0253857	0.0349804	0.0389402	0.0547259	0.0653055	0.0204739	0.0516589	0.0529277	0.0210297	0.0986231	0.0495444
AZD6482	0.0174017	0.062253	0.0510882	0.0482937	0.0436687	0.0634004	0.0294832	0.0755438	0.0627595	0.0895131	0.0633689	0.0326696	0.0297274	0.0783782	2.17361	0.0262317	0.0727476	0.152515	0.0426576	0.0390486	0.0532895	0.0368828	0.0171481	0.0501159	0.0392096	0.041584	0.0255493	0.0469537	0.0365752	0.0454289	0.0397046	0.0606621	0.0409554	0.0343296	0.0465286	0.0509973	0.0416551	0.0457833	0.0610742	0.0258048	0.0442285	0.0314843	0.05332	0.0454146	0.0326489	0.0391494	0.0503037	0.0336662	0.0171601
AZD7545	0.0373326	0.0542894	0.0519505	0.0206083	0.0488664	0.0353242	0.0526497	0.0623126	0.0334103	0.0357483	0.0821985	0.0473037	0.0687509	0.0474241	0.0262317	1.68766	0.0396531	0.0348313	0.0541197	0.0518305	0.0313098	0.08711	0.0425645	0.0469389	0.0273966	0.0642928	0.0306689	0.0384419	0.027769	0.0587137	0.0281468	0.075788	0.0491651	0.0723173	0.0472262	0.0237595	0.049996	0.0237086	0.0740257	0.0709844	0.0826886	0.0533801	0.0590565	0.0334133	0.092691	0.0534332	0.0332047	0.0499502	0.160668
AZD7762	0.0369216	0.0369204	0.029827	0.0477628	0.0339844	0.0974131	0.129988	0.0383196	0.0767704	0.13051	0.0391498	0.0917451	0.0255124	0.0510306	0.0727476	0.0396531	2.24513	0.132048	0.0884755	0.0756212	0.073116	0.029053	0.143705	0.0485719	0.0927534	0.030055	0.103444	0.122178	0.0613863	0.0615206	0.192004	0.0864193	0.0296291	0.0541545	0.0413713	0.0273016	0.0329711	0.041773	0.0267045	0.0268155	0.0558567	0.0931332	0.0274285	0.0194639	0.0416106	0.0226641	0.0185207	0.0749931	0.0443767
AZD8055	0.0246218	0.0369435	0.0434705	0.0310383	0.0250504	0.086265	0.167263	0.0401185	0.105034	0.16188	0.0427669	0.0981325	0.0474977	0.0821275	0.152515	0.0348313	0.132048	2.37143	0.0609524	0.0513893	0.133546	0.0270975	0.0666802	0.0387087	0.122333	0.0306743	0.117315	0.0442782	0.0663167	0.0990472	0.0506707	0.107593	0.0340137	0.0465221	0.0566663	0.0375279	0.0415936	0.0954061	0.0244555	0.013512	0.0114687	0.0689486	0.0535038	0.0272593	0.0489435	0.0332885	0.0258382	0.121	0.0326346
BARASERTIB	0.0132392	0.0600889	0.0499824	0.0313327	0.0279061	0.675567	0.0488437	0.0465983	0.0646072	0.121062	0.0466245	0.220991	0.0286232	0.0874405	0.0426576	0.0541197	0.0884755	0.0609524	2.67755	0.0770593	0.0781809	0.0295684	0.103679	0.0629445	0.0774982	0.0213253	0.0483381	0.0872363	0.243822	0.0384301	0.0374012	1.26592	0.0224389	0.0461635	0.0212455	0.0311438	0.0269598	0.0493205	0.0282605	0.0401657	0.070983	0.0658296	0.0185951	0.022935	0.0716853	0.0141015	0.0353231	0.0657225	0.0405505
BAXCHANNELBLOCKER	0.0187757	0.085703	0.0520195	0.0538813	0.0475998	0.0402759	0.0322575	0.0418864	0.0702282	0.0831728	0.0387885	0.0436322	0.0331657	0.0614357	0.0390486	0.0518305	0.0756212	0.0513893	0.0770593	1.91942	0.040431	0.0455639	0.0378291	0.0463473	0.212012	0.0277097	0.0695121	0.0780254	0.08118	0.0321055	0.0738346	0.0377943	0.0312366	0.0601819	0.0327712	0.0210863	0.035332	0.0249322	0.0308182	0.120149	0.104405	0.107882	0.052481	0.0176453	0.0776092	0.0341539	0.0215906	0.0779475	0.0548149
BELINOSTAT	0.0222121	0.0639515	0.0392384	0.0251471	0.0202856	0.137964	0.1515	0.0284385	0.77689	0.0406781	0.0273939	0.0290358	0.0242387	0.0485107	0.0532895	0.0313098	0.073116	0.133546	0.0781809	0.040431	2.65411	0.023197	0.172272	0.0444627	0.0753794	0.0161787	0.081722	0.024843	0.0851579	0.105078	0.0378993	0.0772926	0.0163637	0.0433511	0.0154967	0.0112649	0.017166	0.0692954	0.0146845	0.00760403	0.01871	0.0439906	0.015989	0.0111258	0.042173	0.0110457	0.0115183	0.114564	0.0252414
BETULINICACID	0.0382297	0.0541171	0.052001	0.0260934	0.0951716	0.0263875	0.0237375	0.150488	0.0307369	0.0292076	0.0834568	0.0301234	0.0548251	0.027146	0.0368828	0.08711	0.029053	0.0270975	0.0295684	0.0455639	0.023197	1.68875	0.0191977	0.0756389	0.0241879	0.0699244	0.0282432	0.0678524	0.0323782	0.044108	0.0360719	0.125505	0.043278	0.0289852	0.040513	0.0470359	0.142463	0.0231271	0.0368409	0.0583153	0.0433227	0.0461674	0.0534237	0.0949973	0.0528171	0.0547071	0.109138	0.02506	0.06125
BI2536	0.0383282	0.0229621	0.0236443	0.0175375	0.0204523	0.203227	0.151621	0.0274012	0.0903178	0.0948108	0.031846	0.0758191	0.0398307	0.0508099	0.0171481	0.0425645	0.143705	0.0666802	0.103679	0.0378291	0.172272	0.0191977	3.1841	0.0422141	0.0501425	0.0308478	0.0997152	0.0362055	0.0621607	0.0709025	0.0527723	0.110058	0.0183062	0.0313625	0.045271	0.0225067	0.0204615	0.0191543	0.0184055	0.0147976	0.0299155	0.0532493	0.0131649	0.00916995	0.0482635	0.0116221	0.0145898	0.100226	0.0556427
BIBR1532	0.0458292	0.0952799	0.0679237	0.0316232	0.0988418	0.0946098	0.024665	0.258245	0.065485	0.0425468	0.0952503	0.0865323	0.0527269	0.0665557	0.0501159	0.0469389	0.0485719	0.0387087	0.0629445	0.0463473	0.0444627	0.0756389	0.0422141	1.84235	0.0438093	0.0385238	0.0516828	0.0748056	0.0679163	0.0511476	0.0652217	0.0822074	0.0376022	0.0417497	0.0482923	0.0533195	0.0466491	0.117336	0.0574235	0.040002	0.0575231	0.0448301	0.0429257	0.0633345	0.0510706	0.0415607	0.0491232	0.0491871	0.0787207
BIX01294	0.0136561	0.0446279	0.0474421	0.0280265	0.0465777	0.0411959	0.0752639	0.0235328	0.103745	0.106174	0.0220491	0.0448709	0.0416925	0.0922759	0.0392096	0.0273966	0.0927534	0.122333	0.0774982	0.212012	0.0753794	0.0241879	0.0501425	0.0438093	1.97636	0.0215796	0.0985319	0.0402178	0.0979041	0.0803977	0.0727336	0.0203083	0.0354201	0.0524837	0.0462116	0.0257751	0.0277102	0.0342537	0.0309666	0.0223231	0.0248006	0.128871	0.0689377	0.024853	0.0603338	0.0482738	0.0283204	0.102355	0.0341134
BLEBBISTATIN	0.0340132	0.0708659	0.0575208	0.0496569	0.0450679	0.0203711	0.0158876	0.0354703	0.0394449	0.0309069	0.04179	0.0136819	0.0653878	0.0273748	0.041584	0.0642928	0.030055	0.0306743	0.0213253	0.0277097	0.0161787	0.0699244	0.0308478	0.0385238	0.0215796	1.9941	0.0397743	0.0464957	0.0517996	0.0298654	0.0601589	0.0154707	0.27651	0.155437	0.083524	0.159236	0.103456	0.0268629	0.133653	0.127267	0.0373987	0.0509959	0.0843437	0.254264	0.0815921	0.140725	0.222429	0.0331756	0.0247071
BMS345541	0.0325043	0.0246921	0.0304494	0.0552477	0.0301647	0.0588367	0.590543	0.0385061	0.0777364	0.130613	0.0248991	0.0837301	0.0687058	0.0370936	0.0255493	0.0306689	0.103444	0.117315	0.0483381	0.0695121	0.081722	0.0282432	0.0997152	0.0516828	0.0985319	0.0397743	2.2453	0.073126	0.0691746	0.0906114	0.0693868	0.0715988	0.0229504	0.043066	0.0399329	0.0528933	0.0325652	0.0323322	0.0648459	0.0173982	0.0257418	0.0789582	0.0384606	0.0321134	0.0628794	0.0359162	0.024761	0.174346	0.0644517
BMS536924	0.0197756	0.051653	0.0327697	0.0585075	0.0469529	0.118737	0.021335	0.0677716	0.0722876	0.0539342	0.0467804	0.0600592	0.0273323	0.0543664	0.0469537	0.0384419	0.122178	0.0442782	0.0872363	0.0780254	0.024843	0.0678524	0.0362055	0.0748056	0.0402178	0.0464957	0.073126	2.21517	0.628514	0.0229069	0.0906357	0.0774258	0.0474406	0.0310086	0.0483934	0.0882897	0.0661554	0.0228787	0.0575287	0.0780547	0.0859132	0.0690541	0.0271931	0.0426176	0.0552764	0.025744	0.0577525	0.0608754	0.0370696
BMS754807	0.0101097	0.0699543	0.0433463	0.0355407	0.0339666	0.225027	0.0501305	0.0432591	0.0798836	0.0731716	0.0295098	0.0953277	0.0338692	0.181645	0.0365752	0.027769	0.0613863	0.0663167	0.243822	0.08118	0.0851579	0.0323782	0.0621607	0.0679163	0.0979041	0.0517996	0.0691746	0.628514	2.35673	0.0289527	0.0395132	0.105117	0.0491099	0.0571821	0.0367775	0.0510082	0.0566101	0.0348723	0.0454315	0.0389561	0.0374988	0.0640563	0.0299602	0.0615574	0.0855188	0.0220497	0.0721515	0.0906349	0.0261922
BORTEZOMIB	0.0395519	0.0473923	0.0381856	0.0241224	0.0399365	0.0611571	0.100944	0.0411127	0.0673261	0.0687267	0.0407448	0.0854507	0.0613533	0.0434021	0.0454289	0.0587137	0.0615206	0.0990472	0.0384301	0.0321055	0.105078	0.044108	0.0709025	0.0511476	0.0803977	0.0298654	0.0906114	0.0229069	0.0289527	1.96679	0.0358553	0.0501855	0.0266184	0.0645391	0.0575853	0.0396202	0.0747346	0.0311494	0.0375885	0.0211025	0.0197973	0.0666468	0.0473719	0.0192826	0.0550679	0.0484892	0.0218971	0.119396	0.0486151
BOSUTINIB	0.0346544	0.0461846	0.0383135	0.453279	0.0667213	0.0892194	0.053815	0.0521711	0.058376	0.0563057	0.035768	0.0284029	0.0417787	0.0327861	0.0397046	0.0281468	0.192004	0.0506707	0.0374012	0.0738346	0.0378993	0.0360719	0.0527723	0.0652217	0.0727336	0.0601589	0.0693868	0.0906357	0.0395132	0.0358553	2.32473	0.0786703	0.0315575	0.0320582	0.0401548	0.0381881	0.0284745	0.0378246	0.0254991	0.0375957	0.0390949	0.108765	0.0423233	0.0233301	0.0403104	0.0398986	0.0215749	0.0714153	0.0475345
BRDK01737880	0.0213685	0.291823	0.022315	0.0246567	0.0527358	0.921062	0.0284303	0.0989556	0.0644512	0.0707272	0.0478181	0.150694	0.0546748	0.0228159	0.0606621	0.075788	0.0864193	0.107593	1.26592	0.0377943	0.0772926	0.125505	0.110058	0.0822074	0.0203083	0.0154707	0.0715988	0.0774258	0.105117	0.0501855	0.0786703	2.72686	0.0156936	0.0390466	0.00822186	0.0106951	0.0164335	0.0304047	0.0140153	0.0519471	0.168383	0.0308089	0.0120245	0.0105604	0.0550425	0.00716401	0.0109406	0.0699251	0.0315875
BRDK02492147	0.00913001	0.0712802	0.106833	0.0345351	0.0709236	0.0239018	0.03348	0.0408834	0.0583381	0.0207297	0.0327017	0.0151597	0.0391314	0.0333796	0.0409554	0.0491651	0.0296291	0.0340137	0.0224389	0.0312366	0.0163637	0.043278	0.0183062	0.0376022	0.0354201	0.27651	0.0229504	0.0474406	0.0491099	0.0266184	0.0315575	0.0156936	1.98148	0.0892812	0.0828812	0.229041	0.183991	0.0271614	0.553044	0.0702792	0.0343023	0.0406186	0.0637556	1.03549	0.0545662	0.067621	0.774486	0.0249447	0.0237488
BRDK13999467	0.0155988	0.0790945	0.0639283	0.0312036	0.0455165	0.0376064	0.0572834	0.0220163	0.0384091	0.0451706	0.0514191	0.0424875	0.0292318	0.0369318	0.0343296	0.0723173	0.0541545	0.0465221	0.0461635	0.0601819	0.0433511	0.0289852	0.0313625	0.0417497	0.0524837	0.155437	0.043066	0.0310086	0.0571821	0.0645391	0.0320582	0.0390466	0.0892812	1.85417	0.080535	1.00361	0.149424	0.0237305	0.125442	0.0836784	0.0373904	0.0583031	0.0467498	0.1166	0.0718948	0.0330579	0.15685	0.0465337	0.0364732
BRDK14844214	0.0251538	0.0512448	0.0587916	0.0341808	0.113888	0.0361586	0.0125258	0.0348387	0.0607229	0.0640387	0.0521163	0.0363721	0.0847724	0.0591597	0.0465286	0.0472262	0.0413713	0.0566663	0.0212455	0.0327712	0.0154967	0.040513	0.045271	0.0482923	0.0462116	0.083524	0.0399329	0.0483934	0.0367775	0.0575853	0.0401548	0.00822186	0.0828812	0.080535	1.72483	0.131569	0.276656	0.345969	0.0472999	0.101212	0.044024	0.0871489	0.0937887	0.0547168	0.0384283	0.0945046	0.0933135	0.0510708	0.0312447
BRDK27224038	0.026516	0.115921	0.110349	0.0769395	0.0416466	0.0451301	0.0110301	0.0641904	0.0466979	0.0260182	0.0335481	0.0220183	0.0254479	0.0206713	0.0509973	0.0237595	0.0273016	0.0375279	0.0311438	0.0210863	0.0112649	0.0470359	0.0225067	0.0533195	0.0257751	0.159236	0.0528933	0.0882897	0.0510082	0.0396202	0.0381881	0.0106951	0.229041	1.00361	0.131569	2.35145	0.203805	0.0202277	0.132271	0.191787	0.0697049	0.0437675	0.04929	0.265914	0.107845	0.0634133	0.318963	0.0277611	0.0133441
BRDK27986637	0.0354385	0.0789758	0.103518	0.0584819	0.131956	0.0221864	0.0168649	0.035743	0.119532	0.0389503	0.0433347	0.0307484	0.0350456	0.0286692	0.0416551	0.049996	0.0329711	0.0415936	0.0269598	0.035332	0.017166	0.142463	0.0204615	0.0466491	0.0277102	0.103456	0.0325652	0.0661554	0.0566101	0.0747346	0.0284745	0.0164335	0.183991	0.149424	0.276656	0.203805	1.94142	0.0281459	0.111624	0.136085	0.0856169	0.0395302	0.0473045	0.235609	0.10779	0.0697391	0.222046	0.0194305	0.0171363
BRDK33514849	0.0345078	0.0470485	0.0508655	0.0575155	0.0614691	0.040798	0.023202	0.0435604	0.0298756	0.0329269	0.0474672	0.0305034	0.0975729	0.0524722	0.0457833	0.0237086	0.041773	0.0954061	0.0493205	0.0249322	0.0692954	0.0231271	0.0191543	0.117336	0.0342537	0.0268629	0.0323322	0.0228787	0.0348723	0.0311494	0.0378246	0.0304047	0.0271614	0.0237305	0.345969	0.0202277	0.0281459	1.97539	0.0248924	0.049665	0.047634	0.436365	0.101322	0.0200326	0.0251249	0.0892089	0.0205821	0.0720982	0.0811528
BRDK49290616	0.0318099	0.0977389	0.157213	0.0446168	0.0635849	0.0240303	0.0144092	0.0446456	0.0718805	0.0282956	0.0393892	0.0129006	0.0261153	0.0253857	0.0610742	0.0740257	0.0267045	0.0244555	0.0282605	0.0308182	0.0146845	0.0368409	0.0184055	0.0574235	0.0309666	0.133653	0.0648459	0.0575287	0.0454315	0.0375885	0.0254991	0.0140153	0.553044	0.125442	0.0472999	0.132271	0.111624	0.0248924	2.08354	0.160897	0.136129	0.0702784	0.111263	0.604851	0.145348	0.120281	0.416858	0.0228392	0.0156604
BRDK50799972	0.00847831	0.0520292	0.0497556	0.0432381	0.0547599	0.0237945	0.00682606	0.045786	0.0217758	0.0267961	0.0365036	0.0179822	0.0240743	0.0349804	0.0258048	0.0709844	0.0268155	0.013512	0.0401657	0.120149	0.00760403	0.0583153	0.0147976	0.040002	0.0223231	0.127267	0.0173982	0.0780547	0.0389561	0.0211025	0.0375957	0.0519471	0.0702792	0.0836784	0.101212	0.191787	0.136085	0.049665	0.160897	1.89318	0.408584	0.124722	0.0451763	0.174222	0.0478268	0.0381928	0.221544	0.027728	0.0563105
BRDK55116708	0.0309483	0.0322652	0.0407143	0.0503435	0.062346	0.0270891	0.0107255	0.0608583	0.058389	0.0245706	0.0594981	0.023118	0.0222484	0.0389402	0.0442285	0.0826886	0.0558567	0.0114687	0.070983	0.104405	0.01871	0.0433227	0.0299155	0.0575231	0.0248006	0.0373987	0.0257418	0.0859132	0.0374988	0.0197973	0.0390949	0.168383	0.0343023	0.0373904	0.044024	0.0697049	0.0856169	0.047634	0.136129	0.408584	1.88521	0.120416	0.0309807	0.0929872	0.0509572	0.0262853	0.0665694	0.0445022	0.0673479
BRDK63431240	0.0128836	0.0366045	0.0407577	0.0742146	0.0474962	0.0379484	0.0512198	0.0335431	0.080204	0.0589528	0.0391487	0.0285696	0.0356193	0.0547259	0.0314843	0.0533801	0.0931332	0.0689486	0.0658296	0.107882	0.0439906	0.0461674	0.0532493	0.0448301	0.128871	0.0509959	0.0789582	0.0690541	0.0640563	0.0666468	0.108765	0.0308089	0.0406186	0.0583031	0.0871489	0.0437675	0.0395302	0.436365	0.0702784	0.124722	0.120416	1.88279	0.0502283	0.044836	0.064398	0.0433677	0.0420939	0.135022	0.0591188
BRDK71935468	0.0285909	0.058021	0.0711731	0.0277461	0.0652674	0.0232889	0.0171233	0.0520114	0.0446189	0.0406305	0.0811064	0.0259967	0.0607642	0.0653055	0.05332	0.0590565	0.0274285	0.0535038	0.0185951	0.052481	0.015989	0.0534237	0.0131649	0.0429257	0.0689377	0.0843437	0.0384606	0.0271931	0.0299602	0.0473719	0.0423233	0.0120245	0.0637556	0.0467498	0.0937887	0.04929	0.0473045	0.101322	0.111263	0.0451763	0.0309807	0.0502283	1.69194	0.145746	0.052078	1.239	0.10462	0.0505375	0.0517235
BRDK86535717	0.0262919	0.0937494	0.114292	0.0324459	0.0793466	0.0159025	0.0108928	0.0547796	0.077841	0.0143138	0.0332983	0.00796785	0.0240391	0.0204739	0.0454146	0.0334133	0.0194639	0.0272593	0.022935	0.0176453	0.0111258	0.0949973	0.00916995	0.0633345	0.024853	0.254264	0.0321134	0.0426176	0.0615574	0.0192826	0.0233301	0.0105604	1.03549	0.1166	0.0547168	0.265914	0.235609	0.0200326	0.604851	0.174222	0.0929872	0.044836	0.145746	2.36493	0.196457	0.21086	1.31105	0.00972368	0.00945658
BRDK88742110	0.167634	0.0648778	0.0387315	0.0243797	0.050537	0.0674636	0.0527506	0.0438906	0.071625	0.0540323	0.0385164	0.0436077	0.0703256	0.0516589	0.0326489	0.092691	0.0416106	0.0489435	0.0716853	0.0776092	0.042173	0.0528171	0.0482635	0.0510706	0.0603338	0.0815921	0.0628794	0.0552764	0.0855188	0.0550679	0.0403104	0.0550425	0.0545662	0.0718948	0.0384283	0.107845	0.10779	0.0251249	0.145348	0.0478268	0.0509572	0.064398	0.052078	0.196457	1.78324	0.0696399	0.19996	0.0792331	0.154522
BRDK94991378	0.0265127	0.0606137	0.0534902	0.0229376	0.083016	0.0228833	0.01405	0.0567141	0.0430005	0.0385237	0.0735175	0.0267274	0.0760044	0.0529277	0.0391494	0.0534332	0.0226641	0.0332885	0.0141015	0.0341539	0.0110457	0.0547071	0.0116221	0.0415607	0.0482738	0.140725	0.0359162	0.025744	0.0220497	0.0484892	0.0398986	0.00716401	0.067621	0.0330579	0.0945046	0.0634133	0.0697391	0.0892089	0.120281	0.0381928	0.0262853	0.0433677	1.239	0.21086	0.0696399	1.77285	0.107901	0.0459391	0.0449966
BRDK96431673	0.0269224	0.0612863	0.100882	0.0370963	0.0965464	0.021011	0.0112803	0.0432699	0.077342	0.0178972	0.0340006	0.00906554	0.0323931	0.0210297	0.0503037	0.0332047	0.0185207	0.0258382	0.0353231	0.0215906	0.0115183	0.109138	0.0145898	0.0491232	0.0283204	0.222429	0.024761	0.0577525	0.0721515	0.0218971	0.0215749	0.0109406	0.774486	0.15685	0.0933135	0.318963	0.222046	0.0205821	0.416858	0.221544	0.0665694	0.0420939	0.10462	1.31105	0.19996	0.107901	2.32753	0.0110629	0.00732064
BREFELDINA	0.0524386	0.043194	0.0252043	0.0606617	0.0314263	0.0807485	0.130441	0.0345092	0.0976466	0.0867105	0.0278767	0.0631296	0.0527658	0.0986231	0.0336662	0.0499502	0.0749931	0.121	0.0657225	0.0779475	0.114564	0.02506	0.100226	0.0491871	0.102355	0.0331756	0.174346	0.0608754	0.0906349	0.119396	0.0714153	0.0699251	0.0249447	0.0465337	0.0510708	0.0277611	0.0194305	0.0720982	0.0228392	0.027728	0.0445022	0.135022	0.0505375	0.00972368	0.0792331	0.0459391	0.0110629	1.97813	0.0617844
BRIVANIB	0.163336	0.0314124	0.0329521	0.0144094	0.0324366	0.0324911	0.0387688	0.0602805	0.0319569	0.0426272	0.0419131	0.0826224	0.0859571	0.0495444	0.0171601	0.160668	0.0443767	0.0326346	0.0405505	0.0548149	0.0252414	0.06125	0.0556427	0.0787207	0.0341134	0.0247071	0.0644517	0.0370696	0.0261922	0.0486151	0.0475345	0.0315875	0.0237488	0.0364732	0.0312447	0.0133441	0.0171363	0.0811528	0.0156604	0.0563105	0.0673479	0.0591188	0.0517235	0.00945658	0.154522	0.0449966	0.00732064	0.0617844	1.62615
CANERTINIB	0.0505724	0.0609801	0.037282	1.12116	0.111699	0.0507828	0.0127804	0.0655121	0.0388507	0.0265602	0.0501942	0.0126867	0.0372731	0.0286745	0.0899131	0.0177038	0.0423919	0.036174	0.0238337	0.0371532	0.0241004	0.0458016	0.013206	0.0592163	0.0284006	0.0363463	0.0274464	0.0498191	0.0265514	0.0268627	0.403693	0.0455063	0.0341284	0.0213229	0.0510629	0.0276626	0.0370625	0.0655956	0.02894	0.0288392	0.0309277	0.0369517	0.0510389	0.031761	0.0171584	0.0464505	0.0322658	0.0358678	0.0142835
CAY10594	0.0334408	0.0897529	0.04605	0.0427307	0.0937861	0.0550833	0.0246723	0.0834563	0.0626324	0.0535686	0.0687599	0.0333304	0.0497444	0.0578682	0.0468068	0.0347193	0.0547599	0.0444275	0.0300962	0.125264	0.0398073	0.0894966	0.0323911	0.106863	0.084239	0.045924	0.0529174	0.0615566	0.0360581	0.0463328	0.147649	0.145675	0.0643851	0.0307736	0.0707556	0.0314349	0.030629	0.0508555	0.106439	0.0615024	0.054643	0.0774611	0.0933936	0.072661	0.0443137	0.0872762	0.0566554	0.0734296	0.0543518
CAY10618	0.0987011	0.0232648	0.0447589	0.0166938	0.035436	0.0544835	0.105374	0.0432204	0.0664026	0.0455221	0.0597868	0.068874	0.0468803	0.0493411	0.0228692	0.0842302	0.0747279	0.0567373	0.0498085	0.047593	0.128991	0.0328853	0.0924425	0.058312	0.0646159	0.0183104	0.0881648	0.0307499	0.0317162	0.141768	0.0348767	0.0283173	0.0237742	0.0437664	0.031007	0.0131487	0.0311964	0.0392081	0.0384151	0.0266217	0.0506412	0.0624094	0.0276177	0.0134565	0.0802699	0.0275222	0.0160337	0.0721979	0.12585
CCT036477	0.0128944	0.087835	0.050025	0.0267117	0.0778051	0.0655251	0.0159926	0.0773389	0.0932336	0.0986865	0.0813871	0.0731977	0.0406764	0.101965	0.0970937	0.0294969	0.0455735	0.0498159	0.0443021	0.0859498	0.0193049	0.045669	0.0291689	0.134811	0.106394	0.024575	0.0422223	0.0504854	0.0682879	0.0761999	0.0306961	0.0171491	0.0461854	0.0598393	0.0986603	0.0877778	0.0880545	0.188232	0.0654971	0.0553319	0.0621976	0.0830182	0.0807195	0.0435594	0.0635964	0.0858929	0.0350874	0.0565766	0.0366085
CD1530	0.0210193	0.0911332	0.0505133	0.0263211	0.156201	0.0567667	0.0233944	0.439792	0.0550395	0.035108	0.0777323	0.0393361	0.0452533	0.0264565	0.0707248	0.0438227	0.0300402	0.0364361	0.0243354	0.0254678	0.036804	0.121909	0.0255949	0.142356	0.0198338	0.0686277	0.030772	0.0422712	0.0249743	0.0471368	0.0454655	0.298474	0.0406196	0.0268543	0.0941842	0.0598597	0.0354865	0.0170854	0.0671019	0.0468482	0.0602362	0.0308205	0.0604443	0.0924587	0.0264092	0.0755228	0.0611037	0.0321933	0.0311825
CD437	0.0156758	0.0469974	0.0345277	0.0262115	0.0393089	0.140782	0.0793582	0.0833498	0.0649087	0.0626849	0.0249594	0.0613585	0.0403128	0.0310299	0.0317849	0.0370986	0.118907	0.0339653	0.0884285	0.0366502	0.10048	0.0310276	0.1411	0.0940479	0.0323605	0.0172696	0.0853404	0.0479021	0.055075	0.062843	0.0500406	0.165997	0.0145982	0.0334064	0.0280966	0.0185367	0.0254229	0.0251364	0.0166236	0.0242991	0.0545374	0.0492469	0.0192013	0.0111435	0.0439079	0.0207408	0.0103941	0.0593774	0.0507085
CEDIRANIB	0.0287029	0.0268132	0.0350909	0.0358371	0.0518096	0.0324539	0.0185124	0.054227	0.0402266	0.0858052	0.0671367	0.173274	0.0328093	0.131587	0.0868915	0.0317184	0.0992181	0.0359888	0.0530213	0.0686536	0.017215	0.0387708	0.0301796	0.0659649	0.0951078	0.021742	0.0425616	0.0941165	0.048725	0.0390429	0.0552745	0.019326	0.0298985	0.0166235	0.0433638	0.0158553	0.0228982	0.0453853	0.0199768	0.0306519	0.0697588	0.0805628	0.0423226	0.0156848	0.0559417	0.037265	0.0161652	0.053205	0.0787611
CERULENIN	0.00903994	0.15273	0.0469801	0.0451807	0.0569054	0.1356	0.0689858	0.0786237	0.146169	0.0867526	0.0616277	0.0642885	0.0355905	0.0999224	0.0760158	0.0775295	0.0515497	0.0616425	0.0995657	0.0860588	0.110623	0.0394516	0.0442471	0.0622703	0.0733014	0.202969	0.039892	0.0617414	0.0962497	0.0550369	0.0537861	0.132553	0.0590729	0.0909123	0.0602563	0.138425	0.116276	0.0424882	0.094015	0.0624599	0.0601014	0.0448005	0.109635	0.0875586	0.0688023	0.118666	0.0888147	0.0558922	0.0270737
CHIR99021	0.043454	0.102743	0.0691565	0.057653	0.0736633	0.0771557	0.0263889	0.0751014	0.0828111	0.0937696	0.0802727	0.0476819	0.0488496	0.0584056	0.0649768	0.0369904	0.0895741	0.0483161	0.0364472	0.0929396	0.0369283	0.0580468	0.0405216	0.0864258	0.071247	0.116459	0.0602498	0.0620624	0.0669662	0.0764834	0.0944813	0.0391554	0.100986	0.0763222	0.0864804	0.142277	0.100381	0.249436	0.0785646	0.0698933	0.0527709	0.0703093	0.0883642	0.0851387	0.0583954	0.0866319	0.0801928	0.0677819	0.0396088
CHLORAMBUCIL	0.0431231	0.0674976	0.0415794	0.0167877	0.0455075	0.177228	0.0503873	0.129135	0.0530561	0.0549747	0.050081	0.0908576	0.0353755	0.0732979	0.0598099	0.0795286	0.097047	0.0436052	0.191871	0.0535347	0.0665962	0.0575913	0.0712993	0.111284	0.0358451	0.0198732	0.0292763	0.0493697	0.0630131	0.0559872	0.0390712	0.120891	0.0185746	0.0340414	0.0302143	0.0172147	0.0368882	0.0250905	0.0183298	0.0542439	0.0789268	0.0448729	0.0271804	0.0194935	0.0480111	0.026389	0.018719	0.0498912	0.0786861
CI976	0.0653913	0.0548601	0.0642285	0.02402	0.109253	0.0267708	0.0525213	0.102176	0.032695	0.0582208	0.0488812	0.0464271	0.0739642	0.0516242	0.0501461	0.0314225	0.0360629	0.0649455	0.0201607	0.0402143	0.0548177	0.154598	0.035396	0.118204	0.0605915	0.0170646	0.0432182	0.0262295	0.0294421	0.0649567	0.0415284	0.0343934	0.0284215	0.0327558	0.0652634	0.0100372	0.0243635	0.102592	0.0195306	0.0134489	0.014862	0.0385143	0.0517498	0.0125739	0.0290614	0.0496517	0.0149001	0.0304275	0.0446618
CICLOPIROX	0.0546688	0.0418387	0.0417611	0.0303707	0.0418334	0.0851535	0.0873965	0.0367281	0.0766348	0.0737701	0.028057	0.0692262	0.0881957	0.0714107	0.0490474	0.0544357	0.079288	0.112223	0.0666044	0.0484715	0.141764	0.0286949	0.081302	0.0547336	0.100205	0.0208694	0.0915294	0.0273289	0.0477238	0.0973046	0.0665636	0.154119	0.0192862	0.0331922	0.0432291	0.0135303	0.0159306	0.0934822	0.0153655	0.0165279	0.0339172	0.111878	0.0413785	0.00980344	0.0897961	0.0494199	0.010031	0.117698	0.0843644
CIMETIDINE	0.0422948	0.152197	0.0836874	0.0282857	0.0387028	0.0345492	0.0217783	0.0719242	0.0319232	0.0309155	0.0506838	0.0407466	0.0761585	0.0349713	0.034852	0.061	0.0209236	0.0322123	0.0469056	0.0243526	0.0221239	0.202539	0.0170745	0.135639	0.0226857	0.0602924	0.0185184	0.0972207	0.0796697	0.0593226	0.0300572	0.0212821	0.0776713	0.0786819	0.0734527	0.0633085	0.176135	0.0343991	0.0374083	0.0614293	0.0426602	0.0152961	0.0277462	0.0695463	0.0775047	0.0435415	0.0566577	0.0218317	0.0242141
CLOFARABINE	0.0107899	0.0348721	0.0322579	0.0173657	0.0242133	0.103573	0.10382	0.03225	0.05562	0.0723891	0.0305369	0.0715779	0.0312762	0.0240924	0.0437115	0.0455002	0.108095	0.062049	0.0841175	0.0403123	0.063438	0.0275228	0.111721	0.0438129	0.0374425	0.0228112	0.0690126	0.0345056	0.0506562	0.0540374	0.0480173	0.196608	0.022014	0.0576056	0.0375753	0.0207909	0.0414523	0.0277495	0.023533	0.0289929	0.03593	0.0605384	0.025228	0.0124666	0.0588614	0.0245132	0.0112796	0.0693225	0.0493838
COL3	0.0131761	0.0548501	0.0428492	0.025649	0.0860604	0.0759196	0.0650802	0.144917	0.0617276	0.0256328	0.0794955	0.0348245	0.0462845	0.0433486	0.0415905	0.114043	0.0261327	0.0312597	0.0410769	0.0365185	0.0743955	0.109738	0.0423463	0.0932976	0.0178929	0.0270077	0.0303461	0.0474063	0.0370695	0.0732012	0.0335467	0.08117	0.0365845	0.0530036	0.0499279	0.0203531	0.028294	0.0315368	0.025032	0.0751851	0.0740381	0.0476543	0.0406794	0.0201574	0.0434694	0.0381905	0.0207086	0.0465615	0.0598613
CRIZOTINIB	0.0318446	0.0492396	0.0317661	0.0266821	0.0327439	0.170818	0.0603544	0.0358864	0.102575	0.0908533	0.0211701	0.0964894	0.0297659	0.127661	0.0390037	0.0357653	0.129898	0.0716196	0.333713	0.148117	0.0670556	0.0252667	0.101516	0.0549659	0.161355	0.0370746	0.062608	0.21473	0.366158	0.0535943	0.049557	0.0589962	0.0366585	0.0680958	0.0388515	0.054946	0.0597619	0.0277338	0.0238663	0.0597076	0.0816588	0.0996385	0.024122	0.0250277	0.0594121	0.0190661	0.0449897	0.141829	0.0380661
CUCURBITACINI	0.00675669	0.151347	0.0645746	0.0323	0.052516	0.149997	0.12912	0.0773435	0.146911	0.173502	0.0476529	0.105013	0.0449693	0.102222	0.0834502	0.0301687	0.06349	0.130268	0.0840763	0.0723626	0.118519	0.0395495	0.0696121	0.0738228	0.145818	0.0521342	0.108774	0.0487409	0.132809	0.145092	0.055246	0.0490158	0.0565699	0.0708658	0.0871727	0.0963038	0.137679	0.0366328	0.081625	0.024265	0.0166086	0.0863804	0.0726396	0.0577409	0.0748518	0.0766995	0.0865933	0.115281	0.0204422
CURCUMIN	0.0120491	0.0638012	0.0298813	0.0560021	0.0407082	0.124588	0.174005	0.0641457	0.0955734	0.0804456	0.0471727	0.0740825	0.0345145	0.0732889	0.0498101	0.0985503	0.112205	0.0875059	0.130152	0.0892363	0.0986137	0.0323937	0.10079	0.0503247	0.0771165	0.0443732	0.112464	0.0810938	0.109822	0.103535	0.0568648	0.217758	0.0396311	0.0558264	0.0256449	0.0620711	0.0379839	0.0573864	0.065045	0.0486162	0.0749289	0.110366	0.0464477	0.0320203	0.0713458	0.0418367	0.0308114	0.146701	0.046879
CYANOQUINOLINE11	0.0166042	0.086782	0.0471088	0.350802	0.059928	0.0818768	0.0138248	0.0533345	0.0892373	0.0466789	0.0384167	0.0314556	0.033762	0.0245882	0.066296	0.0420027	0.0612176	0.0726829	0.0566396	0.0669043	0.0140935	0.0424687	0.0412459	0.0676663	0.0564928	0.101819	0.0845887	0.0982548	0.0978955	0.0458533	0.134027	0.0134405	0.0866316	0.103163	0.058989	0.106541	0.0496198	0.0241027	0.104363	0.10435	0.124062	0.0569335	0.0918142	0.0877874	0.0937148	0.0695304	0.106872	0.0794906	0.0288684
CYCLOPHOSPHAMIDE	0.110632	0.0381472	0.0487567	0.0250226	0.0623321	0.0147266	0.0253952	0.0484435	0.0303209	0.0199992	0.0557402	0.0177104	0.0504692	0.0394328	0.0749557	0.0381593	0.0371331	0.0256781	0.0192247	0.0414224	0.0257687	0.0606716	0.0135008	0.0405169	0.0351184	0.0704144	0.0175159	0.0289933	0.0195878	0.029892	0.0299746	0.0248584	0.0626371	0.0218411	0.0442732	0.0208744	0.0768762	0.0388317	0.0298743	0.0322118	0.0255299	0.0231159	0.0573011	0.0705038	0.0221688	0.0416416	0.0482226	0.0276734	0.040819
CYTOCHALASINB	0.0142829	0.062796	0.0665126	0.0574266	0.0563426	0.213362	0.0197585	0.0737924	0.0725507	0.170858	0.139429	0.0927432	0.041438	0.0671821	0.107738	0.0349328	0.091786	0.0883315	0.166592	0.0708812	0.0276636	0.0740128	0.059422	0.0893335	0.055145	0.0597641	0.0582139	0.168246	0.174674	0.0502523	0.0483053	0.23595	0.0764358	0.0425444	0.0917296	0.102721	0.105663	0.0202077	0.099672	0.0735122	0.0563009	0.0655215	0.0442527	0.114589	0.0690326	0.0443631	0.170929	0.0678861	0.0262721
DABRAFENIB	0.0460026	0.0326537	0.0360533	0.0155334	0.0908209	0.0178389	0.0334891	0.0433758	0.0468691	0.0310763	0.0497928	0.0182143	0.0542679	0.0279669	0.0719227	0.0796872	0.0296392	0.0347497	0.0194519	0.052127	0.0290602	0.0843475	0.0229712	0.0622327	0.0592507	0.0373172	0.0270351	0.0397109	0.026092	0.0773356	0.0377463	0.0179055	0.0451552	0.0431043	0.0508085	0.0294817	0.0387973	0.0828621	0.0350238	0.0432049	0.0344134	0.0712324	0.0657595	0.029246	0.0656436	0.0557342	0.0299089	0.0302748	0.0639372
DACARBAZINE	0.0277773	0.0329812	0.0576847	0.0460079	0.0699097	0.0790056	0.0327525	0.0521423	0.076422	0.0597075	0.0652793	0.0497105	0.0573304	0.03875	0.0598451	0.0569422	0.062563	0.0860055	0.0630416	0.0423887	0.0511383	0.0431057	0.0695268	0.0686821	0.0684839	0.1752	0.0936106	0.0688913	0.0754651	0.0829658	0.0882211	0.0405691	0.0633246	0.114585	0.0785366	0.157226	0.108607	0.0472758	0.0822284	0.0702266	0.0543078	0.128345	0.0479601	0.100173	0.0839839	0.0472867	0.142025	0.0563656	0.0597545
DARINAPARSIN	0.014056	0.0880019	0.114435	0.0335393	0.0868756	0.0391374	0.0288052	0.0671784	0.0608226	0.058377	0.0602942	0.0671642	0.0494597	0.0435295	0.0473773	0.0478635	0.0298765	0.0285622	0.0679487	0.0457406	0.0292018	0.0565575	0.0274372	0.145759	0.0532575	0.0534282	0.0341996	0.0469773	0.0558752	0.0436304	0.0347808	0.0282345	0.0451277	0.0635569	0.0351297	0.0736115	0.0506978	0.0429056	0.0616449	0.0674002	0.0848383	0.0494196	0.0728602	0.0525959	0.0650021	0.0595821	0.0601295	0.0389105	0.049999
DASATINIB	0.0369427	0.0502727	0.0538277	0.141076	0.0559844	0.0486424	0.018834	0.0491927	0.0483731	0.0686298	0.0871035	0.0446701	0.0314571	0.0332017	0.12293	0.0348676	0.189197	0.0677518	0.0285981	0.0490887	0.0167332	0.0374651	0.0215586	0.0388032	0.0346389	0.0390541	0.033145	0.0912365	0.027974	0.0539135	0.184314	0.0328392	0.0551634	0.056008	0.0464082	0.0614238	0.0770499	0.0276827	0.0739448	0.049384	0.0509716	0.0794079	0.038803	0.0554933	0.0407672	0.0365332	0.0551285	0.0386527	0.024175
DECITABINE	0.0171494	0.0600941	0.0504216	0.0468569	0.0387586	0.110116	0.0775209	0.0408626	0.0757648	0.0530033	0.0428791	0.0870528	0.0340237	0.082638	0.032952	0.0567574	0.102924	0.0754078	0.192922	0.0874847	0.0885289	0.0304611	0.0883765	0.0998615	0.0827808	0.0420935	0.0755565	0.0574318	0.117001	0.0712338	0.0644171	0.22859	0.037951	0.097312	0.0315614	0.0555727	0.0679937	0.0510469	0.0537497	0.0610024	0.0718318	0.0894034	0.0263363	0.0522927	0.111421	0.0227786	0.0486418	0.0712709	0.0622409
DEXAMETHASONE	0.0126211	0.0812793	0.0661778	0.0431926	0.0801687	0.0424631	0.0292296	0.069624	0.0872786	0.0597043	0.0547848	0.0524179	0.0867109	0.06735	0.0783605	0.0521995	0.0429937	0.083164	0.0267617	0.0524023	0.0315195	0.0575315	0.0280996	0.0645641	0.0783508	0.0672209	0.0533697	0.0531262	0.0422459	0.0571046	0.0721874	0.0632483	0.0751328	0.0610702	0.0802073	0.0550522	0.0374701	0.0565658	0.0547533	0.0395044	0.0371743	0.0656486	0.0605003	0.0525388	0.0493675	0.0622609	0.0326662	0.0503489	0.0637898
DOCETAXEL	0.0138852	0.0133281	0.0170232	0.0135684	0.00998392	0.145803	0.255306	0.0173111	0.0752485	0.111747	0.0311744	0.05189	0.00980672	0.0336056	0.0243799	0.0202759	0.234269	0.0962683	0.0790184	0.0199509	0.0983875	0.011549	0.754982	0.0278943	0.0521897	0.00938074	0.188463	0.0328661	0.0557704	0.0602536	0.0725907	0.034639	0.0165004	0.0182922	0.0110212	0.00597135	0.0100965	0.0140524	0.00831562	0.00413616	0.0119977	0.0548451	0.00940522	0.00587908	0.0258905	0.00836775	0.00614013	0.105333	0.0202392
DOXORUBICIN	0.0123386	0.0397808	0.0242039	0.0215666	0.0228513	0.14059	0.36901	0.0308365	0.121641	0.116959	0.0204013	0.0890938	0.0237884	0.0434532	0.0535882	0.0398525	0.142675	0.0890079	0.215172	0.0773466	0.105246	0.0192922	0.188263	0.0356686	0.098286	0.0199798	0.172626	0.0318624	0.0584182	0.0618581	0.0490468	0.175693	0.0174167	0.0446825	0.0211837	0.01827	0.0180949	0.0237444	0.0286605	0.0201752	0.0546526	0.0610571	0.0262715	0.0112004	0.0517908	0.0202813	0.0126138	0.113182	0.0435506
ENTINOSTAT	0.0159821	0.0960423	0.0393323	0.0260632	0.043051	0.0762531	0.146765	0.0341815	0.45506	0.065794	0.0283937	0.059568	0.0407917	0.0438283	0.0464704	0.0380348	0.0455649	0.109159	0.0632816	0.0559029	0.986233	0.0344692	0.0631015	0.0433438	0.0657534	0.0233679	0.0783768	0.0417854	0.0799614	0.0850339	0.0359505	0.0745382	0.0265021	0.0577763	0.053513	0.0450225	0.0716497	0.0759224	0.0491742	0.0389064	0.0687873	0.0841316	0.0446618	0.0432406	0.0609119	0.039256	0.0339418	0.0985212	0.0347819
ERASTIN	0.0384792	0.0520103	0.0665865	0.0312727	0.0371959	0.104954	0.0291082	0.125389	0.0830031	0.0784234	0.0769007	0.0596723	0.0547826	0.108353	0.0563286	0.0797774	0.0915826	0.0660072	0.0849734	0.0860651	0.0509685	0.0436677	0.0420417	0.083565	0.0756568	0.0426652	0.0487614	0.0740285	0.0767377	0.0535218	0.0491744	0.116682	0.0393402	0.0560004	0.0483009	0.0320911	0.0360767	0.0693879	0.0373074	0.0774076	0.0801987	0.0706505	0.0729632	0.0287574	0.0637569	0.0641621	0.0276562	0.0880733	0.0633913
ERISMODEGIB	0.796652	0.0349358	0.0426278	0.025205	0.0464306	0.0245458	0.0179831	0.0655437	0.0310564	0.0342373	0.0785661	0.0256015	0.0807933	0.0649848	0.0403696	0.073123	0.0343912	0.0331912	0.0194814	0.0309801	0.0232866	0.0639493	0.0234563	0.0664595	0.0239887	0.0208296	0.0248117	0.0344543	0.0251029	0.038886	0.0413115	0.117823	0.0303843	0.0258037	0.0610357	0.00793054	0.0198203	0.14728	0.0201233	0.0309098	0.0436976	0.0509607	0.0614976	0.0146948	0.0560144	0.0591347	0.0100008	0.0574998	0.111851
ERLOTINIB	0.0805773	0.0224786	0.0306612	0.734972	0.0413934	0.0354603	0.0160203	0.0488265	0.0253282	0.0212132	0.0560294	0.0110497	0.0366507	0.018698	0.0462389	0.0475281	0.0504696	0.0275695	0.0264681	0.0380648	0.014868	0.0423522	0.0149341	0.0340795	0.0179314	0.0331385	0.0296586	0.073377	0.0212291	0.0204908	0.383577	0.0537109	0.0224528	0.0235458	0.0272104	0.0450479	0.0262654	0.0315959	0.0262584	0.06257	0.0823819	0.0697245	0.031437	0.017565	0.0505138	0.0260416	0.0157224	0.0494077	0.0604716
ETOMOXIR	0.0239095	0.0585925	0.0658311	0.0411331	0.0723377	0.0372957	0.0213567	0.0520802	0.0454446	0.0333037	0.0478695	0.0265311	0.0526596	0.0616585	0.0268069	0.0955034	0.0253852	0.029339	0.0354775	0.0427869	0.0191484	0.0493458	0.0269052	0.0542764	0.0360098	0.504742	0.0258293	0.0311939	0.0397213	0.0557246	0.0469184	0.0104866	0.106247	0.0731921	0.0633451	0.121344	0.088897	0.0379386	0.19458	0.0811909	0.0559494	0.0621901	0.0739614	0.172563	0.0770969	0.0745286	0.14293	0.0389142	0.0465352
ETOPOSIDE	0.00503287	0.0766215	0.0326893	0.0140636	0.0305341	0.322057	0.0523283	0.0640452	0.0899802	0.112946	0.0417561	0.148084	0.0320909	0.0491007	0.0476293	0.036019	0.0944293	0.0831609	0.20093	0.0533148	0.0901624	0.029392	0.11445	0.0722344	0.0515089	0.0135805	0.072851	0.0435134	0.0826138	0.0597234	0.0340714	0.429531	0.0182064	0.0363379	0.0459515	0.0155439	0.0301576	0.0288668	0.0237403	0.0292359	0.0398227	0.0468469	0.0283225	0.0131219	0.050969	0.0280073	0.0138232	0.0605663	0.0383998
EX527	0.166705	0.0453068	0.0649451	0.0187511	0.0488283	0.0309959	0.0483882	0.0253133	0.0341467	0.0617026	0.0366284	0.0386595	0.189454	0.0507703	0.0228488	0.0542902	0.0266512	0.0566774	0.0184812	0.0210625	0.0555475	0.0444874	0.0409221	0.0383505	0.0588796	0.111062	0.0665413	0.0253372	0.0344711	0.0856033	0.043839	0.0321992	0.0348966	0.0398976	0.0847879	0.0328663	0.0213507	0.0488021	0.0296025	0.0152226	0.0118415	0.0325641	0.0717006	0.0277266	0.103944	0.0826077	0.0286384	0.0553119	0.0752531
FGIN127	0.0293425	0.112414	0.156185	0.0458666	0.165026	0.0270541	0.0128026	0.0595555	0.0538436	0.0181913	0.0366803	0.014621	0.0205423	0.0231764	0.0554842	0.0394177	0.0314843	0.025924	0.0236928	0.0375328	0.0130594	0.11521	0.0145946	0.0716984	0.0306299	0.34482	0.0328304	0.0525496	0.0386808	0.0252809	0.037324	0.0124355	0.41277	0.153008	0.0554366	0.177986	0.101787	0.0227053	0.33443	0.119284	0.0654712	0.0293936	0.179806	0.637457	0.163096	0.241046	0.468409	0.0139538	0.013497
FLUOROURACIL	0.0264414	0.0270821	0.0467671	0.0815297	0.0474767	0.131722	0.0584635	0.0543557	0.0756063	0.0522409	0.0500219	0.0561667	0.0530873	0.0703621	0.0415824	0.0389259	0.0713317	0.0724893	0.125033	0.0394882	0.0682312	0.041772	0.102477	0.101491	0.061001	0.072025	0.0909953	0.0699488	0.0903504	0.0575359	0.094116	0.0274326	0.0483545	0.0491759	0.0460248	0.074027	0.0424645	0.0932695	0.0468992	0.0475458	0.0587089	0.0928663	0.0353709	0.0485783	0.0697835	0.0338871	0.0600853	0.0974318	0.0752071
FLUVASTATIN	0.0404227	0.0730434	0.055735	0.0243994	0.0614736	0.052827	0.0438041	0.0862778	0.0376112	0.0734699	0.156312	0.0548301	0.0667302	0.0608187	0.0546239	0.0417205	0.0526526	0.0505204	0.0324536	0.0255122	0.0430473	0.0587659	0.0456691	0.10323	0.0342871	0.0622158	0.0392668	0.0333735	0.0334532	0.0924678	0.0358399	0.0469082	0.0286817	0.0568976	0.0446319	0.0405578	0.0495716	0.0132586	0.0546698	0.0282622	0.0228837	0.0530508	0.0505767	0.058541	0.0485713	0.054711	0.0540378	0.0532313	0.0333785
FORETINIB	0.0177112	0.0721298	0.0370863	0.0228166	0.0488821	0.243055	0.0386602	0.0794445	0.07498	0.136767	0.0655003	0.371158	0.0449428	0.10231	0.0918329	0.0290761	0.121204	0.107013	0.168169	0.0740867	0.0467506	0.0399591	0.0612822	0.0808258	0.103707	0.0377343	0.0677999	0.183094	0.237453	0.0438106	0.0553801	0.148746	0.0265846	0.0405467	0.0544393	0.0423012	0.0619065	0.0512512	0.029935	0.027316	0.0316999	0.0437348	0.0339607	0.0267967	0.0457045	0.0295952	0.0316038	0.0628882	0.0375265
FULVESTRANT	0.0395234	0.0663242	0.0555927	0.0479549	0.0837418	0.0409487	0.0197516	0.14696	0.0746406	0.0330773	0.0477285	0.0605483	0.121629	0.0324096	0.103246	0.0408073	0.0419083	0.0779233	0.058413	0.0789307	0.0200799	0.0861998	0.0453213	0.137213	0.0497663	0.0419768	0.0468818	0.0826056	0.114972	0.0495926	0.0341229	0.0192807	0.0949539	0.0593669	0.0843403	0.0536762	0.0802112	0.031856	0.113422	0.189183	0.101354	0.0458841	0.0624322	0.104916	0.101347	0.0802294	0.239538	0.034437	0.0203586
FUMONISINB1	0.0183019	0.0852091	0.0606075	0.0413193	0.114995	0.037635	0.0183214	0.0679823	0.0441187	0.0579872	0.0671161	0.0475831	0.0817921	0.0897628	0.0596614	0.0466722	0.0382587	0.0489282	0.0273743	0.0453478	0.0166177	0.055114	0.0223026	0.050116	0.0365007	0.121729	0.0373489	0.0625632	0.0504478	0.0384945	0.0448524	0.0221967	0.0603645	0.0758732	0.114804	0.172996	0.197037	0.0660247	0.0884298	0.0897537	0.0486282	0.0531819	0.0842103	0.0593326	0.0498156	0.109272	0.0881985	0.0471413	0.050101
GANT61	0.0615852	0.0642164	0.0443264	0.0532208	0.078578	0.0229196	0.0340697	0.061063	0.0566784	0.0575848	0.0317472	0.0284696	0.0427677	0.0782415	0.120154	0.0287875	0.117109	0.0476951	0.0350788	0.11241	0.0357251	0.0555974	0.0175669	0.0854713	0.181352	0.0251244	0.043523	0.0561799	0.0449607	0.0277927	0.0824992	0.0311542	0.0272354	0.0277007	0.0527042	0.0144733	0.02638	0.0740555	0.022259	0.0257191	0.0531055	0.0782234	0.0508525	0.0238949	0.030345	0.044844	0.0211714	0.0481731	0.0284421
GDC0879	0.0335095	0.028287	0.0474311	0.018086	0.03968	0.0197898	0.0463607	0.0525358	0.0378255	0.0357354	0.0648404	0.0281683	0.0586169	0.0218151	0.0286278	0.0928132	0.0262912	0.0323525	0.0311784	0.0521031	0.0294037	0.0909108	0.0247987	0.057524	0.0445192	0.0305471	0.0451256	0.0550504	0.0360203	0.0618227	0.03068	0.0267004	0.0386639	0.0391508	0.0369926	0.0320462	0.0593547	0.0895449	0.0303244	0.0615623	0.0597804	0.0645903	0.0492924	0.0346444	0.0733799	0.0526534	0.0285861	0.0427404	0.111011
GDC0941	0.0121045	0.0472897	0.0279408	0.101626	0.0424582	0.15462	0.0237071	0.0825109	0.0967284	0.0860078	0.0547175	0.0399419	0.0267737	0.0714603	0.289638	0.0309751	0.0736813	0.131814	0.0845833	0.0735565	0.0370818	0.0329014	0.0440682	0.0515986	0.0515602	0.0307011	0.0655736	0.156215	0.0984159	0.0271504	0.0967289	0.102646	0.0356233	0.0235212	0.0611266	0.0605249	0.0293992	0.12587	0.0402527	0.058003	0.0836129	0.0849087	0.0460826	0.0227109	0.0685136	0.043421	0.0296045	0.079511	0.042085
GEFITINIB	0.0274318	0.0266532	0.032312	0.952066	0.0597444	0.0323005	0.0212802	0.070778	0.0292185	0.0303258	0.0343832	0.0122258	0.0336205	0.0218515	0.0459761	0.0314748	0.0434523	0.0261108	0.0340769	0.05894	0.0162291	0.0442302	0.0169562	0.0546041	0.0327426	0.0297375	0.0384827	0.0866216	0.0304324	0.0267766	0.464453	0.0176048	0.0217407	0.024757	0.0311484	0.0447062	0.0428265	0.0594513	0.0304159	0.059785	0.07097	0.0769925	0.0339355	0.0214193	0.033904	0.0263234	0.0259455	0.0533191	0.0311906
GEMCITABINE	0.0184305	0.023184	0.0294574	0.0143901	0.0252499	0.0781751	0.101417	0.0304087	0.0568696	0.055579	0.0202003	0.0723856	0.0362026	0.036946	0.0325703	0.0374246	0.110385	0.0585805	0.0704447	0.0370632	0.0781834	0.0185378	0.116083	0.0597741	0.068034	0.0131305	0.0926007	0.0322766	0.0571706	0.103425	0.0361407	0.106968	0.0120329	0.0388678	0.0217955	0.010318	0.0168158	0.0226453	0.0141144	0.0136558	0.0339565	0.0704075	0.0187835	0.00718571	0.0594056	0.0195081	0.00738936	0.109795	0.0582426
GMX1778	0.0326883	0.0334594	0.0513087	0.0147467	0.0585402	0.0660849	0.0893652	0.0641323	0.0828976	0.0581202	0.0520012	0.0938882	0.0654966	0.0613337	0.0234558	0.0351006	0.056698	0.0897817	0.0432185	0.039557	0.111356	0.0388579	0.0840345	0.0677035	0.112813	0.0143734	0.0952776	0.0258331	0.0386761	0.104642	0.0314442	0.0236197	0.0374884	0.0298382	0.0646953	0.0193633	0.0622527	0.0528519	0.0395679	0.0138472	0.0150092	0.0560375	0.0404105	0.0243049	0.059755	0.0470253	0.0247138	0.0512708	0.0680877
GOSSYPOL	0.0457779	0.0843553	0.0454718	0.0218533	0.0705553	0.0671617	0.0501532	0.109958	0.0701522	0.0461408	0.0593271	0.0733981	0.0805694	0.0657501	0.0379503	0.0718252	0.0267089	0.0465569	0.032043	0.0299012	0.079281	0.0587914	0.0628453	0.179782	0.0272345	0.048756	0.0672174	0.0279211	0.0378422	0.122628	0.0273217	0.137621	0.0429656	0.0459253	0.0437742	0.0524827	0.0850435	0.0156121	0.0982109	0.0210755	0.0194588	0.028897	0.0357228	0.0598129	0.0522966	0.0401263	0.0685814	0.0449692	0.0489404
GSK1059615	0.00995973	0.11196	0.0408383	0.0738633	0.0510335	0.110214	0.0475884	0.104149	0.128914	0.0834243	0.0999079	0.0488162	0.0214008	0.0615949	0.362906	0.026547	0.0641191	0.116932	0.0553656	0.0800979	0.0686063	0.0581855	0.029464	0.101675	0.025949	0.0202792	0.0433093	0.0897568	0.0541514	0.0341097	0.0796656	0.16205	0.0314113	0.0235572	0.0267947	0.0146304	0.0213945	0.0339388	0.0185798	0.0338025	0.0443073	0.0379841	0.0447902	0.0144677	0.0271724	0.0422908	0.0149264	0.0380334	0.0177196
GSK3INHIBITORIX	0.0433056	0.115583	0.0567891	0.0446926	0.0929856	0.0844552	0.0680044	0.105735	0.0731605	0.0992452	0.0672336	0.0875946	0.047412	0.0699519	0.0579338	0.0270546	0.0989539	0.090147	0.0251932	0.0586181	0.0568535	0.0675879	0.0491744	0.0840702	0.0776657	0.0343324	0.0818848	0.0830632	0.0536269	0.118478	0.127864	0.0660263	0.0360028	0.0609094	0.0902518	0.0832128	0.0794231	0.0547685	0.0424418	0.0230551	0.0234126	0.0435306	0.0730877	0.0364198	0.0363093	0.0702168	0.0278891	0.0637034	0.035323
GSK461364	0.0244172	0.0191034	0.0187854	0.0152299	0.0208478	0.194161	0.176761	0.0332469	0.0543328	0.102818	0.0239446	0.0829715	0.0334647	0.046842	0.018801	0.0449072	0.208814	0.0589971	0.131769	0.029995	0.100672	0.0207855	1.76947	0.0525865	0.0384215	0.015862	0.0953055	0.0405043	0.0526013	0.0725832	0.0548055	0.095856	0.010469	0.033353	0.0335972	0.0120683	0.0175219	0.0163573	0.00804175	0.0166486	0.0287528	0.0681947	0.0115989	0.00462854	0.0417529	0.0105857	0.00678288	0.105981	0.0516966
GW405833	0.00892308	0.0980192	0.0353144	0.0625231	0.0525827	0.093971	0.049175	0.0902847	0.119203	0.0647383	0.0489926	0.0680075	0.0347969	0.0641366	0.0558573	0.0618228	0.0770073	0.0936925	0.0780438	0.207282	0.0863503	0.0631461	0.0773626	0.117109	0.104461	0.0543485	0.0830507	0.106959	0.129193	0.0647123	0.0796198	0.192916	0.0355858	0.113429	0.0689693	0.0776667	0.0820864	0.0634337	0.0638934	0.0707891	0.0631429	0.132566	0.0426021	0.0397411	0.0696991	0.0348903	0.0467862	0.118986	0.0481234
GW843682X	0.0221586	0.0582328	0.0347791	0.04486	0.0477432	0.229189	0.0971003	0.110066	0.0775336	0.0473123	0.0329722	0.0587546	0.0286995	0.0813582	0.0299221	0.0755138	0.112842	0.039377	0.138563	0.0524144	0.116415	0.0464954	0.339597	0.096458	0.0415781	0.0373365	0.064397	0.092455	0.079511	0.0449571	0.113505	0.0692719	0.0314408	0.0393991	0.0522791	0.04273	0.0361518	0.0153898	0.0216298	0.0700884	0.0962293	0.0780556	0.0255962	0.0147251	0.0500197	0.0238426	0.0158911	0.0802959	0.0595075
HLI373	0.0206201	0.0590964	0.0532323	0.0489403	0.0323654	0.0725262	0.0460688	0.0316331	0.087865	0.159146	0.0378131	0.0950679	0.0489242	0.0904655	0.0431687	0.0196899	0.110166	0.120822	0.10315	0.136723	0.0595333	0.0377439	0.0750636	0.0535296	0.250221	0.0418885	0.150828	0.0645488	0.112844	0.0789671	0.0842883	0.0692127	0.0373544	0.0667332	0.0632846	0.0723246	0.0431528	0.119234	0.0492955	0.0302253	0.0281518	0.105003	0.0560568	0.0279464	0.068985	0.0411422	0.0373148	0.124486	0.0367186
HYPERFORIN	0.151802	0.0611715	0.0300827	0.0196352	0.0773736	0.0447366	0.0235259	0.120266	0.0377322	0.0319072	0.0877413	0.0398753	0.0930911	0.0358512	0.0301772	0.0648542	0.0267377	0.0194542	0.0180737	0.0356245	0.0245531	0.0936725	0.0272735	0.140477	0.0197717	0.0231183	0.0417635	0.0433173	0.0236866	0.0393593	0.0465106	0.0776535	0.0230632	0.0224113	0.0539873	0.0125198	0.0249935	0.0230058	0.0149817	0.0249627	0.0501936	0.0257192	0.0500856	0.0153563	0.0546702	0.0666793	0.00994281	0.046689	0.133046
IBRUTINIB	0.0246059	0.0342423	0.0696462	1.17562	0.0973773	0.0348755	0.0281621	0.040793	0.0535512	0.0358409	0.042793	0.0139395	0.0431334	0.0545967	0.057784	0.0344864	0.0334036	0.0352966	0.0261898	0.047705	0.0329081	0.0302811	0.0171561	0.0409301	0.0343044	0.0188168	0.0330095	0.0237409	0.0202555	0.0300007	0.267029	0.0197671	0.0388901	0.0235978	0.0782354	0.0134181	0.0198889	0.0848205	0.0171869	0.0404286	0.0494421	0.0681273	0.0441795	0.0132634	0.0261851	0.0392483	0.0136995	0.0428065	0.0176182
IFOSFAMIDE	0.083932	0.0390636	0.0509569	0.0188423	0.0571789	0.0163403	0.0318906	0.0541761	0.0248268	0.0253101	0.0642662	0.0264262	0.111798	0.0471588	0.029942	0.123898	0.0238253	0.0307323	0.0168259	0.0314212	0.0323059	0.0386308	0.0217413	0.0514658	0.0411101	0.104747	0.0319489	0.0221697	0.0245521	0.037337	0.018506	0.0312925	0.0685926	0.037164	0.0514786	0.0301556	0.0360193	0.0465172	0.0474417	0.029257	0.0325825	0.0372449	0.0987608	0.05704	0.0555294	0.0752872	0.0610713	0.0418555	0.0839569
IMATINIB	0.0361447	0.0407931	0.0477387	0.0233009	0.0464175	0.0286384	0.0316	0.0458185	0.0362158	0.106408	0.0573156	0.304577	0.0950916	0.0582627	0.0287472	0.0634955	0.0749988	0.0692685	0.0418774	0.0847965	0.0187609	0.0507829	0.0378234	0.0630939	0.084423	0.0510629	0.104589	0.0300227	0.0271228	0.0856466	0.0468145	0.0240537	0.0421997	0.0513928	0.0634364	0.0342486	0.0442829	0.0482173	0.0270085	0.0312254	0.0316251	0.0759176	0.0498356	0.0258584	0.0472596	0.0549816	0.0263205	0.0690444	0.0862251
IMPORTAZOLE	0.0276117	0.0595824	0.0464498	0.0419491	0.148033	0.0588553	0.0188284	0.221351	0.0490273	0.0485442	0.074776	0.0461486	0.067028	0.0435736	0.0478544	0.0299192	0.0409777	0.0412524	0.033073	0.0596115	0.0188898	0.15384	0.0275599	0.109725	0.0743652	0.107709	0.0578085	0.0526259	0.0353022	0.0355766	0.0892769	0.0835891	0.030636	0.0197678	0.0804593	0.0355952	0.0304305	0.0563217	0.0368379	0.0319857	0.0431725	0.0513633	0.0957534	0.0274114	0.0357203	0.0999655	0.0427529	0.0364199	0.039147
ISOLIQUIRITIGENIN	0.0491853	0.0549896	0.067711	0.0292461	0.0551644	0.0501192	0.027035	0.0428872	0.0440981	0.0292049	0.0579534	0.0645393	0.0678182	0.0414148	0.03901	0.088885	0.0326444	0.0383134	0.045803	0.0728544	0.0274199	0.0653292	0.027861	0.0398861	0.0728279	0.0134708	0.0378964	0.0357833	0.0255926	0.0764265	0.0376902	0.0264813	0.0390304	0.0477367	0.0252701	0.0198439	0.0166554	0.0408023	0.0607661	0.0410781	0.0533824	0.0732161	0.0613386	0.0173939	0.0670404	0.0637365	0.0170584	0.043479	0.126274
ISONICOTINOHYDROXAMICACID	0.183273	0.0361415	0.0354947	0.0144586	0.0365027	0.0280685	0.0362295	0.0589755	0.0264927	0.0375685	0.0745484	0.0436527	0.167073	0.0300719	0.0144365	0.102167	0.0300127	0.0291476	0.0314138	0.0222763	0.025703	0.075353	0.0322217	0.0463958	0.0369041	0.0387866	0.069806	0.0480291	0.0359695	0.0559296	0.0280085	0.117432	0.0751498	0.0194744	0.0457111	0.0308113	0.0402891	0.073748	0.0364561	0.0207346	0.0300609	0.0327184	0.0527728	0.0305708	0.212109	0.061311	0.0312472	0.0604496	0.171507
ISOX	0.0199731	0.104275	0.0418319	0.0390989	0.0437417	0.146517	0.0586303	0.0514857	0.780592	0.0749418	0.0378589	0.0497416	0.0301554	0.070556	0.0539603	0.0551306	0.0851645	0.0573212	0.0810385	0.0946462	0.781414	0.0361558	0.113523	0.0632044	0.058128	0.0750519	0.05402	0.0881045	0.0798196	0.0458305	0.0872577	0.103466	0.0696074	0.0595662	0.0621267	0.09058	0.0953214	0.0676215	0.113358	0.0697157	0.141554	0.0770607	0.0403277	0.0783773	0.0695624	0.0383027	0.0723797	0.10406	0.0430466
ITRACONAZOLE	0.0114981	0.143899	0.0815407	0.0348926	0.121177	0.0697907	0.031844	0.0811945	0.0439593	0.0605252	0.0912809	0.104305	0.0500971	0.0439579	0.0492606	0.095855	0.0467504	0.0315761	0.0702927	0.0759902	0.0261214	0.0859799	0.0280709	0.104676	0.0338922	0.0501518	0.0333085	0.0554617	0.0550404	0.0696833	0.0513345	0.160441	0.0885064	0.113476	0.0552713	0.0585019	0.127768	0.0310388	0.108728	0.102292	0.0639264	0.0702893	0.0512724	0.0619357	0.0765964	0.0503553	0.0667297	0.0427982	0.0596536
KI8751	0.0228921	0.0886321	0.0625611	0.0147204	0.0475824	0.175978	0.0288881	0.114474	0.0359575	0.101122	0.0711458	0.780287	0.0706048	0.140972	0.0407821	0.039891	0.0657756	0.0618706	0.104888	0.0288604	0.0358113	0.0476316	0.0374311	0.127938	0.0517998	0.0151714	0.0519211	0.0519514	0.07173	0.0584679	0.0380154	0.207672	0.017325	0.0253158	0.0339005	0.0150324	0.0255411	0.0439182	0.0115298	0.0145838	0.0168867	0.0240298	0.033572	0.00814652	0.0298583	0.03411	0.00763947	0.0447366	0.0768537
KO143	0.00939205	0.0701059	0.0585234	0.0324425	0.0919106	0.056437	0.0342368	0.0443663	0.0659096	0.0611538	0.0309452	0.0531235	0.0428549	0.0950312	0.0324426	0.0553141	0.0403611	0.0828567	0.0326366	0.078945	0.0468241	0.0498834	0.0618544	0.0592747	0.0822547	0.110645	0.0603071	0.0543761	0.0632847	0.068317	0.0662741	0.0615828	0.0679823	0.106972	0.197495	0.228298	0.106058	0.0203801	0.173264	0.0809055	0.0421719	0.0724924	0.0932244	0.203691	0.0568689	0.0968633	0.232613	0.0572758	0.0424814
KU0060648	0.0104004	0.0456454	0.0330808	0.117871	0.0373057	0.0773787	0.0462656	0.060583	0.104898	0.0898738	0.0238689	0.0441838	0.0354451	0.113823	0.177626	0.0281214	0.0966263	0.0893392	0.0840298	0.128037	0.0617987	0.0268785	0.0735388	0.0621928	0.108822	0.0534132	0.110794	0.132898	0.0995807	0.0624359	0.0791085	0.0470392	0.0429164	0.044728	0.0530121	0.064409	0.0430198	0.14077	0.0416053	0.0773345	0.116358	0.124026	0.0358025	0.0252419	0.0618104	0.0290455	0.036629	0.135136	0.0432908
KU0063794	0.0144424	0.0396459	0.0342652	0.0290161	0.037857	0.0905966	0.0509726	0.0469549	0.07527	0.13221	0.039306	0.0717896	0.0522561	0.121433	0.218457	0.0404191	0.102293	0.997608	0.0619534	0.0724136	0.103979	0.0276428	0.0406707	0.039123	0.102647	0.0258449	0.0707815	0.0608463	0.0647542	0.0450471	0.0557454	0.115644	0.0239226	0.0299305	0.0541946	0.0237545	0.0295624	0.0731803	0.01925	0.0230577	0.0331966	0.0657339	0.05051	0.0178455	0.0563685	0.0340407	0.0207175	0.103634	0.033702
KU55933	0.0481423	0.0621021	0.0406919	0.0610155	0.0605688	0.0506404	0.0520701	0.0572537	0.0664841	0.0595421	0.0382289	0.0452384	0.0266467	0.0395436	0.218373	0.0497772	0.139433	0.0794788	0.0672727	0.0850847	0.0665457	0.0367451	0.0403411	0.0951765	0.0607559	0.0417817	0.0487128	0.0769385	0.0399961	0.0693319	0.0581545	0.0570865	0.0364063	0.0926627	0.0512447	0.114691	0.0802167	0.0396854	0.0501769	0.0735308	0.123773	0.0761556	0.0239384	0.0457754	0.0443634	0.0186383	0.0494581	0.0633473	0.0396345
KU60019	0.0342059	0.0947674	0.0338231	0.091325	0.0971375	0.0846479	0.0412833	0.0741047	0.0588571	0.0766631	0.0346694	0.0572156	0.0539241	0.0584124	0.168123	0.0393806	0.134931	0.0615463	0.0933017	0.0944139	0.064526	0.0431391	0.0495772	0.108279	0.0629478	0.0477168	0.0523274	0.0925903	0.0845957	0.0393331	0.0914615	0.19049	0.0328504	0.0718965	0.0593714	0.0935534	0.0799623	0.0834236	0.0456651	0.107108	0.160069	0.0765669	0.0335812	0.0632379	0.0520505	0.0270342	0.053562	0.0801519	0.0475129
LAPATINIB	0.0106763	0.0358091	0.0418265	1.38736	0.0816147	0.0432042	0.0174926	0.0372567	0.0520059	0.0303001	0.0229964	0.0126771	0.0307206	0.0271893	0.0484805	0.015817	0.0351619	0.0420799	0.0332014	0.0657991	0.032895	0.0320281	0.0187985	0.0469497	0.0524645	0.0370757	0.0490197	0.0649617	0.0432659	0.0312554	0.419991	0.057681	0.0350833	0.0348125	0.0511543	0.046402	0.062381	0.0550423	0.0476063	0.04508	0.0343594	0.0897842	0.0371734	0.0240975	0.0268712	0.0307715	0.0366608	0.052616	0.0176614
LE135	0.0429029	0.0869166	0.0456342	0.0349995	0.0788333	0.0795129	0.05922	0.108004	0.101238	0.0979743	0.0794163	0.0550851	0.0662862	0.0924614	0.0612136	0.079561	0.0803244	0.0855678	0.0259969	0.0412676	0.0520271	0.0602255	0.0672414	0.0638739	0.0651731	0.0260495	0.0574376	0.0319523	0.0285778	0.0916664	0.0752354	0.142545	0.0346403	0.0351154	0.0736286	0.0273595	0.0231042	0.0287794	0.0346742	0.0203637	0.023951	0.0555438	0.0799449	0.0223694	0.0564204	0.0860926	0.0170126	0.0718101	0.0559025
LINIFANIB	0.0396205	0.0409632	0.0331626	0.0615255	0.0507999	0.102485	0.151032	0.0632864	0.0736228	0.0794199	0.0453044	0.20065	0.0738599	0.0800929	0.0311112	0.0646581	0.115849	0.0954605	0.151572	0.0836983	0.0585471	0.0440128	0.0942036	0.0953426	0.0810208	0.0653516	0.190799	0.0837612	0.094253	0.0600989	0.0780391	0.0660527	0.0274355	0.0454977	0.0326873	0.029522	0.0571687	0.0760089	0.0527424	0.0326299	0.0562725	0.0853454	0.0342208	0.0388133	0.0617184	0.0359329	0.0318763	0.0896439	0.0797782
LINSITINIB	0.0195974	0.0928292	0.0463421	0.0332283	0.0407023	0.0993273	0.0747627	0.0515686	0.0750823	0.0691113	0.024796	0.0552298	0.0411932	0.0792526	0.0298408	0.0939852	0.0523711	0.0774485	0.143982	0.0783442	0.0963661	0.044995	0.0508586	0.0569868	0.0965251	0.0914911	0.0742067	0.349779	0.636393	0.0328574	0.0512979	0.131681	0.0567213	0.0705638	0.0502307	0.0749473	0.0533825	0.104819	0.0715571	0.0430358	0.0452462	0.046516	0.0651607	0.0715952	0.1155	0.0557602	0.0677737	0.0969748	0.0577163
LOVASTATIN	0.0190782	0.0695926	0.0467192	0.024859	0.0603447	0.0788263	0.020981	0.089969	0.0608456	0.0697848	0.256938	0.0557596	0.0444875	0.0354753	0.077548	0.0592232	0.063569	0.0457675	0.0360571	0.0312758	0.0290796	0.0657751	0.0459241	0.0655803	0.0238737	0.0592516	0.0274159	0.0630784	0.0423804	0.0638358	0.0382643	0.0558036	0.0467902	0.0491311	0.0767716	0.0944033	0.0945746	0.0261251	0.110625	0.0457524	0.0502831	0.0595493	0.0638479	0.0692596	0.0566381	0.0676319	0.0771812	0.0561608	0.0342115
LY2183240	0.0136037	0.0602183	0.0273736	0.0138755	0.0225924	0.201872	0.0751833	0.0505346	0.0712591	0.191786	0.0415427	0.21392	0.0536901	0.049982	0.0318724	0.0403413	0.0822774	0.068008	0.117795	0.0434574	0.0625248	0.0229103	0.319863	0.0794337	0.0532173	0.0321351	0.109828	0.0292704	0.0527883	0.114763	0.0364519	0.200917	0.0195449	0.037577	0.0323487	0.0244181	0.0256083	0.0184358	0.0148607	0.0155151	0.0189349	0.0365212	0.0253435	0.0120475	0.0518661	0.0276371	0.0163485	0.0784731	0.0436346
MANUMYCINA	0.017324	0.120229	0.036098	0.0249477	0.200378	0.114269	0.0371383	0.114643	0.131013	0.0469314	0.0947565	0.0831588	0.0475105	0.0796147	0.0568379	0.0846153	0.0445905	0.040346	0.0503157	0.0642328	0.0658508	0.0712378	0.0442638	0.0928223	0.0382593	0.0252366	0.0363574	0.0500219	0.0452917	0.101357	0.056628	0.335649	0.0505824	0.0511903	0.101013	0.0275601	0.0773488	0.0415572	0.0386187	0.0731168	0.0758299	0.057272	0.0844595	0.0333144	0.0646298	0.109625	0.030094	0.0415449	0.0420066
MASITINIB	0.013869	0.0496517	0.029074	0.0322701	0.0484001	0.0580157	0.033295	0.0523498	0.0736526	0.0816242	0.0507178	0.272524	0.0405568	0.133408	0.0449078	0.0640977	0.103276	0.0536293	0.0973272	0.145426	0.0283816	0.0427644	0.0415224	0.0657644	0.136206	0.0319306	0.0968292	0.0572424	0.0554576	0.0723432	0.0600983	0.0571997	0.0310594	0.0562373	0.0343212	0.0531088	0.0510411	0.0333725	0.0399649	0.0714168	0.108268	0.124855	0.0376222	0.0355235	0.0681794	0.0344948	0.0364665	0.0924586	0.0747733
MERCK60	0.0142879	0.0481205	0.051678	0.0430325	0.0329141	0.101468	0.106228	0.033461	0.488842	0.0563906	0.0263108	0.0631157	0.0339578	0.0525549	0.0382522	0.0452694	0.0809185	0.122522	0.0882244	0.0521067	0.504413	0.0358352	0.0925686	0.0471799	0.05071	0.0337578	0.0793454	0.0495404	0.0918446	0.0676751	0.0457841	0.0616424	0.0422409	0.0842663	0.03956	0.122751	0.116757	0.0744179	0.0763769	0.0299954	0.0575014	0.0926577	0.0331015	0.0774531	0.0625119	0.0224321	0.0577401	0.0887607	0.0382248
METHOTREXATE	0.109445	0.0166019	0.0388565	0.0206874	0.0402591	0.0338376	0.0827874	0.0444524	0.0363835	0.0422412	0.0427373	0.0445814	0.0873358	0.0197585	0.0200706	0.0601657	0.0819507	0.0556771	0.0380872	0.0313841	0.040705	0.0605064	0.132799	0.067831	0.043891	0.0771885	0.0948432	0.0306415	0.0304349	0.0845618	0.0875235	0.0673333	0.0225981	0.0482326	0.0413794	0.0251508	0.0272706	0.0202359	0.026323	0.026925	0.0349043	0.0721388	0.0286403	0.0289976	0.0635714	0.0287356	0.0247615	0.0491713	0.157125
MG132	0.0289804	0.0329205	0.0274076	0.0233829	0.022269	0.0509218	0.136021	0.0493547	0.11691	0.0771327	0.0958799	0.0676402	0.0311283	0.052616	0.0386947	0.0731794	0.0687875	0.108916	0.0678177	0.0916593	0.081502	0.0611696	0.0938815	0.0689236	0.132752	0.0219839	0.107249	0.0343005	0.0459464	0.767837	0.0406087	0.0122083	0.0455148	0.0366984	0.0288506	0.016059	0.0231467	0.0223862	0.0202081	0.0147076	0.0348602	0.0912186	0.0500595	0.0158872	0.055254	0.0536375	0.0163711	0.112848	0.0367769
MGCD265	0.0185866	0.0765048	0.0490768	0.0252703	0.0573223	0.107863	0.0303739	0.0902528	0.0637436	0.0814204	0.0815148	0.256509	0.0480958	0.140651	0.097127	0.0764035	0.084752	0.0630559	0.0695862	0.068643	0.0260906	0.050386	0.0323134	0.0893607	0.0521632	0.058169	0.0403396	0.0681204	0.0616213	0.0349616	0.0684018	0.059446	0.0405381	0.0760522	0.0515476	0.0636389	0.131434	0.0259894	0.0426506	0.0568209	0.0584273	0.0402567	0.0578655	0.0524991	0.0540599	0.0547158	0.0452191	0.0476583	0.0685382
MK1775	0.0154182	0.0546521	0.0414754	0.067985	0.0657808	0.186617	0.177337	0.0433762	0.120244	0.101178	0.0259842	0.0598887	0.0290087	0.0648227	0.0274582	0.0379446	0.288588	0.0825666	0.126737	0.0648243	0.077995	0.0278192	0.205478	0.0570048	0.0843335	0.0336478	0.123637	0.0880557	0.104507	0.0679931	0.192831	0.113281	0.0499263	0.0554553	0.0548815	0.123956	0.18136	0.0250295	0.114909	0.0429457	0.0537951	0.114291	0.0370243	0.0872425	0.0712215	0.028481	0.0892708	0.0722515	0.0324889
MK2206	0.015776	0.0630914	0.0607682	0.0457596	0.0351921	0.0929817	0.0314466	0.0508481	0.107512	0.0916591	0.0346996	0.0507661	0.0345843	0.185602	0.217258	0.0414985	0.0569579	0.160117	0.0715096	0.116244	0.0575096	0.0272927	0.0367807	0.0343846	0.0938423	0.0696768	0.0545117	0.057704	0.081445	0.0361668	0.0536488	0.0815935	0.121781	0.0558401	0.0587307	0.122573	0.0436216	0.0808603	0.0799001	0.0467814	0.0584141	0.0501943	0.0720194	0.0634309	0.0447323	0.0508906	0.0651919	0.0771624	0.0258395
MLN2238	0.0403219	0.0311654	0.0307243	0.019782	0.0287548	0.0557929	0.188566	0.0320704	0.0860308	0.0472979	0.0412987	0.0474829	0.0455005	0.0282156	0.0358094	0.0656095	0.0679255	0.100586	0.0361025	0.0356009	0.137788	0.0338714	0.0820846	0.0268884	0.0716672	0.0357187	0.101608	0.0237232	0.0249144	1.42088	0.0397344	0.0429283	0.0274387	0.0533018	0.0418704	0.0270366	0.0481807	0.013132	0.0446999	0.0207683	0.0237014	0.0719496	0.0447083	0.0235675	0.0591782	0.0421455	0.0228648	0.111871	0.0616971
MST312	0.0236413	0.0534411	0.0401652	0.0197252	0.0393998	0.114443	0.138977	0.115916	0.0978192	0.0825966	0.0468596	0.0937846	0.0475792	0.0638663	0.0665703	0.0792666	0.0617174	0.0853581	0.0700524	0.0308235	0.112145	0.0681605	0.0784867	0.0724098	0.0421806	0.0449186	0.130179	0.0441391	0.0588427	0.124398	0.035147	0.133245	0.0325832	0.0405469	0.0346685	0.0307527	0.0267242	0.0279916	0.0512576	0.0237719	0.034786	0.0447269	0.0461141	0.0254392	0.0683789	0.0476374	0.0246944	0.0781479	0.0544434
MYRICETIN	0.26855	0.0489932	0.0423035	0.0188514	0.0475846	0.0284557	0.010464	0.0598602	0.0240917	0.0414715	0.0835144	0.0261712	0.174179	0.023525	0.0240724	0.0487448	0.0217553	0.0258028	0.0141227	0.0308457	0.0144428	0.0742296	0.022668	0.0498056	0.0334408	0.110199	0.0459392	0.0256546	0.0240209	0.031388	0.0457318	0.10183	0.0377711	0.0231594	0.067895	0.0245119	0.0151236	0.0559793	0.027415	0.028729	0.0247281	0.0327528	0.0740387	0.0248354	0.0969862	0.0854533	0.0237638	0.0472135	0.148378
MYRIOCIN	0.038712	0.130223	0.502015	0.0429222	0.0600514	0.0384035	0.0191685	0.068389	0.0484606	0.0394114	0.0468595	0.0370553	0.0820212	0.0316632	0.0802989	0.068742	0.0279875	0.0381957	0.0399972	0.0265979	0.0194915	0.112961	0.0276014	0.133831	0.0135912	0.11254	0.0477694	0.087763	0.0594814	0.0245257	0.0405225	0.0187052	0.147904	0.0923574	0.0508491	0.129764	0.11308	0.0311154	0.148173	0.0898515	0.0602441	0.0520872	0.0626424	0.108057	0.0650186	0.0890185	0.091137	0.0297464	0.0260358
NARCICLASINE	0.0258055	0.0256249	0.0236547	0.0420441	0.0265087	0.0965877	0.775743	0.0488733	0.104705	0.0759296	0.0292115	0.0500404	0.0278719	0.050238	0.0336833	0.0727698	0.20331	0.0969085	0.12073	0.0607567	0.127514	0.028052	0.197727	0.0436664	0.0651318	0.0359789	0.217084	0.0787606	0.0686744	0.0754146	0.0662822	0.0745936	0.0225761	0.0520414	0.0376855	0.0335044	0.0283571	0.02722	0.0253444	0.0358362	0.0831452	0.128957	0.0262509	0.0136166	0.0525119	0.019935	0.0193449	0.209919	0.0447208
NAVITOCLAX	0.00944418	1.12153	0.0540359	0.0425362	0.0913651	0.0786664	0.0117766	0.143925	0.0728753	0.0456165	0.0793267	0.0509695	0.0502029	0.078433	0.0555766	0.0542641	0.0294552	0.0240412	0.0642437	0.0664953	0.0390339	0.0822438	0.0158305	0.126935	0.0294916	0.0468419	0.0204328	0.0684147	0.0828214	0.0386672	0.036018	0.240842	0.0735815	0.046239	0.0587803	0.0599728	0.0880677	0.0470756	0.0586384	0.0909143	0.0719763	0.0464708	0.0562493	0.0752701	0.0461088	0.0609149	0.0560827	0.0475421	0.0311042
NECROSTATIN1	0.0966794	0.0936251	0.0442938	0.0340984	0.0456419	0.0363823	0.0285704	0.0565171	0.047193	0.0426807	0.0604353	0.0285408	0.0323711	0.112182	0.078031	0.0638473	0.0711028	0.0344146	0.0465269	0.0692455	0.0493972	0.048349	0.0321141	0.0659759	0.038274	0.0449843	0.0252657	0.0580047	0.0520976	0.0258691	0.0323911	0.0717216	0.0642774	0.0683201	0.0495434	0.0542041	0.0486645	0.0683932	0.111843	0.101189	0.16914	0.0606012	0.0495216	0.0885525	0.0474524	0.0407087	0.0630745	0.0561012	0.0529075
NERATINIB	0.0136019	0.0411646	0.0463806	1.44551	0.0590933	0.040037	0.0261572	0.0317453	0.044886	0.0453366	0.0263408	0.0114108	0.0333925	0.0454906	0.0636203	0.0210459	0.0551647	0.0584713	0.028634	0.0710676	0.0301392	0.0221619	0.0179681	0.0294713	0.0679806	0.0629547	0.0365359	0.0445481	0.0384274	0.0283014	0.434998	0.0292722	0.0412944	0.0360777	0.043761	0.072532	0.0474785	0.0762703	0.0607003	0.0378772	0.0353219	0.0651932	0.0620612	0.044828	0.0322248	0.0506159	0.0483871	0.0723057	0.0149889
NICLOSAMIDE	0.0209122	0.0596713	0.0551483	0.0132271	0.0650397	0.0488237	0.0549864	0.153686	0.0467516	0.041077	0.0942693	0.0800714	0.0565287	0.0379011	0.0362213	0.0756713	0.0284763	0.0410231	0.0327452	0.0322417	0.0515419	0.0908396	0.037576	0.195508	0.0291063	0.0204656	0.0547869	0.0272627	0.0240068	0.099611	0.0234014	0.0962531	0.0258298	0.0533113	0.029426	0.0316587	0.052519	0.0109519	0.0354535	0.024613	0.0307885	0.033882	0.0430392	0.023671	0.0541987	0.0456782	0.0185264	0.0394924	0.063333
NILOTINIB	0.051107	0.0670155	0.0389141	0.0232954	0.0900142	0.0343437	0.0169027	0.136547	0.0542662	0.0309592	0.0723014	0.096955	0.0500759	0.0433212	0.0276876	0.0710324	0.046972	0.0276399	0.0374988	0.0752745	0.022221	0.158299	0.0225116	0.106541	0.0577165	0.0310818	0.043829	0.0356723	0.0313224	0.0399608	0.0686681	0.117457	0.0266369	0.0409496	0.0414197	0.028866	0.0656124	0.018272	0.031198	0.0414427	0.0643687	0.0492825	0.062763	0.0253894	0.0578919	0.0703173	0.0270286	0.0378561	0.102585
NINTEDANIB	0.0319125	0.0453826	0.0351756	0.0322917	0.0960689	0.0692374	0.014265	0.172123	0.0529005	0.0460055	0.0655299	0.162033	0.0368906	0.0582967	0.0704734	0.0317575	0.0888103	0.0378105	0.0449452	0.0641074	0.0217101	0.0903205	0.0370195	0.137443	0.0504725	0.0605923	0.0377035	0.163676	0.0681587	0.0311781	0.0711141	0.0907202	0.0388734	0.0262761	0.0646649	0.0714473	0.0691501	0.0506772	0.049383	0.0476286	0.0798718	0.0464819	0.0421781	0.0824155	0.0319704	0.0437832	0.089932	0.0359837	0.0481195
NSC23766	0.0301124	0.0381001	0.0555674	0.0473201	0.0535814	0.0344309	0.0769651	0.0283733	0.0657377	0.0862492	0.0397223	0.0528992	0.0411146	0.135161	0.0372349	0.0345434	0.101016	0.0910542	0.0896801	0.137806	0.035563	0.0315744	0.0492041	0.0474496	0.29998	0.0259015	0.09057	0.0584385	0.0937465	0.0399622	0.0756412	0.031718	0.0339514	0.0585107	0.0795045	0.047193	0.033347	0.0959882	0.0324769	0.0764296	0.0911007	0.157419	0.0614274	0.0248225	0.0551062	0.037984	0.0270769	0.0709375	0.0469718
NSC632839	0.00908001	0.0649929	0.0365475	0.0389206	0.0540556	0.149593	0.0774481	0.0673151	0.0774907	0.0879254	0.0433023	0.0608103	0.0435933	0.0784814	0.0303346	0.0381185	0.0914027	0.0476474	0.0736252	0.0562817	0.0902704	0.0323654	0.110389	0.0816115	0.0967516	0.0323214	0.116331	0.050504	0.0688342	0.0989179	0.101885	0.0462963	0.0170331	0.0397226	0.0665494	0.0256293	0.0204966	0.0240605	0.0375089	0.0579109	0.0605602	0.108187	0.0420677	0.0134185	0.0590373	0.0472272	0.0157483	0.109735	0.042851
NUTLIN3	0.0237262	0.0844531	0.0381997	0.0311665	0.0342249	0.0837468	0.0626297	0.043712	0.102443	0.118146	0.0715369	0.0879547	0.0445966	0.116026	0.0940538	0.0443762	0.0511312	0.106171	0.108867	0.13317	0.0801704	0.0530769	0.0572007	0.0620043	0.149012	0.0431386	0.103793	0.0556499	0.116201	0.0647195	0.036876	0.0393115	0.0295331	0.0752625	0.0578753	0.0411172	0.0531946	0.0806612	0.0445263	0.0402658	0.0516274	0.0898884	0.0513203	0.0362996	0.104386	0.0396222	0.0315142	0.116693	0.0455207
NVPBEZ235	0.0105803	0.0291841	0.0489952	0.0237981	0.0305224	0.102004	0.0893149	0.0509814	0.150092	0.201865	0.0511706	0.0632537	0.0386611	0.142861	0.0950869	0.0227652	0.0692242	0.878264	0.078547	0.0401816	0.104429	0.0272705	0.0656458	0.0658838	0.109611	0.0163806	0.108134	0.034388	0.0770156	0.0649286	0.0531347	0.0452139	0.0294528	0.0233924	0.0656149	0.011428	0.0173747	0.146924	0.0148755	0.0172994	0.0216432	0.093509	0.04236	0.0112877	0.0525513	0.0346672	0.0116837	0.103632	0.0308012
NVPTAE684	0.0212348	0.0978249	0.0353194	0.0551059	0.0571149	0.214849	0.020894	0.0830901	0.0892158	0.0768618	0.0510522	0.0774764	0.0286436	0.13101	0.0508743	0.0208942	0.122451	0.0582325	0.148174	0.115497	0.0435589	0.0424062	0.0511533	0.077916	0.10206	0.0281442	0.0459934	0.514968	0.643138	0.0293042	0.102092	0.0832231	0.035684	0.0405573	0.0467242	0.0452806	0.0523443	0.0232182	0.0294654	0.05173	0.0527859	0.0571627	0.0393598	0.0343041	0.044381	0.0337362	0.039849	0.0717676	0.0269685
OBATOCLAX	0.0290723	0.0718791	0.041743	0.0424731	0.0560582	0.106357	0.0963314	0.078915	0.118021	0.0998719	0.0385665	0.0596488	0.0337189	0.064357	0.0611646	0.0469586	0.137584	0.0890051	0.0795033	0.120891	0.113385	0.0535943	0.138223	0.088866	0.175407	0.033166	0.0990879	0.0671063	0.0782847	0.0830163	0.105018	0.0761987	0.0334922	0.0487136	0.046429	0.0342599	0.0420933	0.0448223	0.0594223	0.0377787	0.0569808	0.245419	0.0538838	0.0319408	0.06373	0.055683	0.0290506	0.13124	0.0553674
OLAPARIB	0.0128759	0.134978	0.0777119	0.021344	0.0575239	0.309119	0.0246062	0.0704189	0.0870758	0.107448	0.0924355	0.106404	0.0510853	0.136435	0.0527818	0.0550387	0.059111	0.0573676	0.175231	0.0429606	0.0495811	0.0383296	0.0699897	0.0960273	0.0552003	0.0506564	0.0500996	0.0583718	0.0919488	0.057066	0.0530896	0.0890832	0.0518578	0.0597098	0.059894	0.202904	0.0620926	0.0707133	0.0767852	0.0348584	0.0404663	0.0576463	0.048212	0.0673405	0.111201	0.0573512	0.0681846	0.040427	0.0577142
OLIGOMYCINA	0.0373784	0.0702789	0.0431578	0.0207008	0.0523855	0.0660524	0.0351837	0.0711246	0.0574862	0.036067	0.0603698	0.0612857	0.063024	0.0593396	0.0409216	0.352961	0.0223715	0.0513516	0.0441343	0.0292678	0.0649007	0.0578024	0.0530343	0.0550884	0.020521	0.0443084	0.0351478	0.023287	0.0309693	0.0707081	0.0231042	0.055036	0.0371545	0.0564128	0.0561253	0.0419486	0.0624239	0.037779	0.0547181	0.0281583	0.0353483	0.0357136	0.0476814	0.0442153	0.067853	0.0550446	0.0325406	0.035158	0.0623261
OSI027	0.0184385	0.0601583	0.0373258	0.0337226	0.036509	0.145958	0.054411	0.0913223	0.0951606	0.0784388	0.0679417	0.0649865	0.0308243	0.0916666	0.232391	0.0490908	0.0752469	0.470475	0.105412	0.0611468	0.107708	0.0467669	0.0379007	0.0640717	0.0417251	0.0295951	0.0561894	0.0661947	0.0611203	0.0543931	0.0447938	0.194391	0.029519	0.049508	0.029466	0.0395824	0.0368841	0.0569432	0.0405573	0.0587486	0.0570975	0.0586187	0.0417533	0.0337511	0.0582853	0.0305498	0.027601	0.0695425	0.0355273
OSI930	0.0392107	0.0470318	0.0616356	0.0376009	0.0696315	0.0913103	0.0339582	0.0639169	0.0753108	0.0464796	0.0459187	0.0891442	0.0592074	0.0495905	0.0349048	0.111456	0.0574808	0.0399341	0.0723505	0.0635322	0.0713532	0.0428171	0.0618747	0.176586	0.0430308	0.0148112	0.0663939	0.0481515	0.063309	0.0480735	0.0455009	0.338698	0.0252382	0.0620837	0.0444528	0.0129137	0.0339308	0.120836	0.0252981	0.0587207	0.102204	0.052664	0.0344267	0.00925663	0.0578151	0.0342554	0.00775755	0.0882763	0.0889598
OUABAIN	0.0674773	0.0331626	0.0402245	0.0206135	0.0266298	0.0622888	0.202118	0.0321628	0.0745013	0.117924	0.0514147	0.0985336	0.0549773	0.0867571	0.0286215	0.0624993	0.0933735	0.173815	0.0580276	0.0495309	0.0763066	0.0275089	0.100094	0.0490521	0.112077	0.042817	0.17968	0.028961	0.0477967	0.0979743	0.0532895	0.0272226	0.0229078	0.0446317	0.0455989	0.0263604	0.0283172	0.0382684	0.0188296	0.0145763	0.018336	0.06795	0.054852	0.0117946	0.0719347	0.0534114	0.0148369	0.132218	0.0842648
PAC1	0.0443577	0.066656	0.0482069	0.0493276	0.0586205	0.0981401	0.0705539	0.0612188	0.110739	0.0745251	0.0284007	0.0669106	0.0592189	0.181989	0.0605655	0.0540956	0.0601101	0.102244	0.0877499	0.155254	0.185102	0.047592	0.0567405	0.0800411	0.158125	0.0196215	0.0611897	0.0494427	0.110836	0.0691685	0.0705707	0.0752358	0.0332549	0.0436171	0.0527525	0.0199434	0.030018	0.0566038	0.0240898	0.0261488	0.0353984	0.107384	0.0457589	0.0200374	0.12586	0.0439409	0.0231121	0.0865349	0.0621527
PACLITAXEL	0.0223337	0.0255279	0.0240433	0.023206	0.0233076	0.197282	0.274195	0.0467239	0.0701041	0.0766554	0.0227367	0.0876007	0.0284688	0.0348256	0.0232933	0.028683	0.140553	0.0713356	0.087264	0.0202751	0.0901973	0.0140805	0.564369	0.0662138	0.0349693	0.0128507	0.136953	0.0347899	0.0504844	0.0782444	0.0636621	0.0531266	0.0125054	0.0285274	0.0292752	0.0114783	0.0166107	0.0127198	0.0141928	0.00822314	0.0188109	0.0396592	0.0142373	0.00690924	0.0300219	0.0131159	0.00730926	0.0923771	0.0319177
PARBENDAZOLE	0.0155131	0.0281368	0.0235534	0.0138771	0.0167943	0.225014	0.163976	0.0449847	0.0607075	0.144264	0.0298985	0.140832	0.0398522	0.0470942	0.0249645	0.0347306	0.111444	0.0861703	0.12039	0.0277726	0.103491	0.0150432	0.564376	0.0452862	0.0383942	0.0209123	0.159731	0.0256707	0.0500908	0.0852921	0.0382131	0.0379542	0.0127694	0.027418	0.0251423	0.0168203	0.0183279	0.0224343	0.0121283	0.0102805	0.015954	0.0496297	0.015239	0.00862479	0.0434491	0.0154145	0.0105042	0.097911	0.0435532
PARTHENOLIDE	0.109222	0.0444541	0.0476349	0.0141585	0.041521	0.0387589	0.0559433	0.0410169	0.0450407	0.0836415	0.0622392	0.0427815	0.129571	0.152876	0.028372	0.0205181	0.0186533	0.0637911	0.0166974	0.0190286	0.124213	0.0497882	0.0289982	0.0499374	0.0759993	0.0150723	0.0687678	0.017239	0.0265071	0.0618157	0.0275351	0.0937675	0.0230997	0.0150781	0.0873075	0.00539777	0.00951772	0.100323	0.00553769	0.00606926	0.00601785	0.0218136	0.0808902	0.00542066	0.0581868	0.123042	0.00398171	0.0502677	0.0532747
PAZOPANIB	0.0177344	0.0384875	0.0770101	0.0195869	0.0317312	0.0659839	0.0840679	0.0491475	0.0568892	0.0907439	0.054137	0.391747	0.0385689	0.153017	0.0463898	0.092988	0.093761	0.148669	0.0917862	0.0515631	0.0370806	0.0309872	0.0507684	0.0872524	0.060325	0.0350487	0.056564	0.04791	0.0823566	0.0886617	0.0271958	0.03765	0.0471934	0.140902	0.04084	0.0951448	0.0807459	0.0307736	0.0717244	0.0431956	0.0418442	0.0581166	0.0405904	0.0500538	0.0627645	0.0328724	0.0367352	0.0737442	0.0739506
PF543	0.0281215	0.0349447	0.0398377	0.0499785	0.0520942	0.0450455	0.0545781	0.0545916	0.0759427	0.0746455	0.0271305	0.0449784	0.0526665	0.0534193	0.0297079	0.0491324	0.0675241	0.060473	0.0641022	0.152118	0.0330432	0.0987398	0.0408758	0.052372	0.158565	0.0239972	0.125917	0.141778	0.100389	0.0476636	0.0907068	0.0430502	0.0369796	0.0268688	0.0686162	0.0261819	0.0511541	0.0628553	0.0495504	0.0758113	0.0778754	0.231703	0.0496763	0.036726	0.0893105	0.0530182	0.0540992	0.109509	0.0740828
PF750	0.0257109	0.0974495	0.0496715	0.0282887	0.0763691	0.0622132	0.0189851	0.101069	0.0768965	0.031049	0.0720698	0.0432913	0.0543692	0.0907986	0.0488065	0.200627	0.0247418	0.0457778	0.0354895	0.0413879	0.0493191	0.0617348	0.0380361	0.0875991	0.0271888	0.0460135	0.0246753	0.0288819	0.0357621	0.0572845	0.0286864	0.0536949	0.0712663	0.0716714	0.067344	0.0859343	0.116371	0.0607043	0.102366	0.0392356	0.0369912	0.0414562	0.0604446	0.117828	0.0582769	0.0638255	0.0747134	0.0324736	0.0403523
PHA793887	0.0101589	0.0299334	0.0249101	0.0515903	0.0283038	0.107065	0.433059	0.037283	0.124532	0.0762765	0.032807	0.0549265	0.0308036	0.0680622	0.0359258	0.0555091	0.146444	0.0930565	0.186357	0.0748349	0.0878611	0.0259885	0.170229	0.0510104	0.0808147	0.0386947	0.210695	0.0595673	0.0720262	0.0545678	0.0686997	0.145243	0.0322064	0.0523467	0.0291312	0.0771461	0.0441124	0.0421998	0.0442836	0.037086	0.104316	0.126993	0.029634	0.0238906	0.0687297	0.023295	0.0308314	0.125664	0.0591461
PHLORETIN	0.02343	0.0899506	0.0444243	0.0277499	0.0500837	0.0980533	0.0538045	0.101447	0.0865049	0.0530115	0.0721292	0.0822509	0.0359341	0.0734748	0.0583619	0.153124	0.0479654	0.0497122	0.0811954	0.0657854	0.0612964	0.0468107	0.0704285	0.0937469	0.0233949	0.0569959	0.0433602	0.0505837	0.0551896	0.0604866	0.036796	0.17313	0.0586096	0.0967937	0.0453019	0.0927401	0.0939503	0.0446968	0.130954	0.0837424	0.094772	0.055151	0.0435761	0.0922599	0.102849	0.0389505	0.103998	0.0511824	0.091552
PI103	0.0172042	0.0881616	0.0531263	0.020792	0.0705509	0.134122	0.0341004	0.118547	0.113095	0.143504	0.0602853	0.102722	0.0573007	0.11487	0.154173	0.0300861	0.0521269	0.151369	0.041674	0.0483098	0.0480732	0.0425614	0.0461148	0.115297	0.0843704	0.0431916	0.0761794	0.0639356	0.0642726	0.0733078	0.0511286	0.0792481	0.0494396	0.0278655	0.0841973	0.0579063	0.100675	0.138684	0.058172	0.0164247	0.0197037	0.0346629	0.0937101	0.0542712	0.0630653	0.102308	0.0420632	0.0618996	0.0294855
PIFITHRINALPHA	0.0178047	0.073201	0.0554641	0.0276285	0.0814754	0.0568204	0.0185694	0.102598	0.0452076	0.0498306	0.0589729	0.0627034	0.0603008	0.0670218	0.0451934	0.107435	0.0437006	0.0489556	0.032324	0.0645294	0.0256288	0.0880233	0.0328048	0.0880109	0.0419179	0.010872	0.0373364	0.0608353	0.0454824	0.0484458	0.0418409	0.0703644	0.034541	0.0605005	0.0848235	0.0200874	0.0288536	0.149122	0.0678008	0.0416876	0.0508432	0.0719358	0.0663155	0.0156341	0.0499524	0.064599	0.013941	0.0500038	0.0725523
PIFITHRINMU	0.0116824	0.105993	0.0481733	0.0270354	0.0533279	0.0413187	0.0575917	0.0774162	0.060876	0.0387799	0.0432928	0.0506975	0.0387705	0.0402542	0.0409311	0.0954699	0.0326088	0.0385402	0.0703007	0.0733818	0.0605238	0.0797199	0.0304552	0.0546315	0.0512214	0.149476	0.0297033	0.0367482	0.0700817	0.0489659	0.0291222	0.0596729	0.0624645	0.100589	0.0408263	0.0934177	0.193456	0.0641415	0.0825967	0.0936445	0.0587621	0.0503931	0.0661108	0.111112	0.0915082	0.0582139	0.116276	0.0397957	0.0491709
PIPERLONGUMINE	0.0102819	0.0855823	0.0311711	0.0462734	0.0635698	0.108343	0.0483893	0.093263	0.107665	0.0804254	0.0507451	0.0734509	0.0594591	0.0744553	0.0672318	0.0568641	0.0594916	0.0555268	0.0836528	0.0816352	0.0761145	0.0549673	0.0584026	0.0584029	0.111577	0.106181	0.105206	0.0674493	0.110442	0.083364	0.0611952	0.0424201	0.0533961	0.0456867	0.0539933	0.0566052	0.0942908	0.150487	0.0903284	0.0492282	0.0415393	0.0717488	0.105029	0.0864896	0.0676594	0.109705	0.0938554	0.0915235	0.0409125
PLX4720	0.0306838	0.0522786	0.0473034	0.0211867	0.0636326	0.0253015	0.0239739	0.0768968	0.0531383	0.0429964	0.0711305	0.0260082	0.0513078	0.0265779	0.0833031	0.0673974	0.0266825	0.0395316	0.0179694	0.0595779	0.0150241	0.0658278	0.013884	0.0552028	0.0395422	0.090184	0.0345897	0.0344148	0.0215631	0.0458504	0.0462919	0.0337794	0.0850853	0.0459533	0.068402	0.0827022	0.0543301	0.121522	0.0809195	0.0752498	0.0481581	0.0498156	0.126733	0.0918536	0.0566241	0.125971	0.0588226	0.0334188	0.0706542
PRIMA1	0.00977754	0.0810315	0.0602967	0.0286956	0.0446308	0.0588814	0.0191474	0.0421361	0.0776151	0.0694173	0.045849	0.0452427	0.0411545	0.137218	0.0650899	0.048856	0.0298335	0.0602319	0.0707897	0.122931	0.0702642	0.031082	0.0254094	0.0384636	0.123783	0.0730849	0.0338607	0.031704	0.075934	0.056073	0.025395	0.0236843	0.0330506	0.0535126	0.049233	0.0567974	0.0439721	0.130354	0.0352495	0.0510162	0.0537961	0.0444428	0.113099	0.0412028	0.0672889	0.106198	0.0408398	0.0705986	0.0259925
PRIMA1MET	0.0087246	0.0746221	0.118025	0.0331153	0.0496527	0.0332427	0.0157555	0.0436757	0.0452802	0.0484782	0.0415788	0.016893	0.0465782	0.0271987	0.053741	0.0386989	0.0284986	0.0431668	0.0307423	0.0289266	0.0160453	0.056114	0.029851	0.0220039	0.037606	0.164979	0.0256583	0.0497913	0.0417858	0.0298769	0.0555501	0.0153406	0.126449	0.138483	0.345207	0.206147	0.0847599	0.0266884	0.129979	0.231263	0.110996	0.0629652	0.109477	0.187114	0.0542493	0.149002	0.165742	0.0258273	0.021184
PRL3INHIBITORI	0.109373	0.065291	0.0648443	0.0212749	0.135769	0.0415208	0.0156992	0.109642	0.0547566	0.0471688	0.0867968	0.0440325	0.0839848	0.113289	0.0434723	0.0642299	0.0288849	0.0304893	0.021933	0.0341194	0.0265921	0.143913	0.0314464	0.125908	0.0355086	0.0856859	0.0291433	0.0298309	0.0255674	0.0429995	0.0448504	0.171346	0.0604192	0.026442	0.0880782	0.0338682	0.0699249	0.0307886	0.0516867	0.0311765	0.037647	0.0361347	0.103523	0.0648553	0.0461278	0.0890027	0.0542103	0.0334077	0.074686
PROCARBAZINE	0.244931	0.0294651	0.0554215	0.0253328	0.0381578	0.012789	0.0399879	0.0502627	0.0218338	0.0295092	0.0516376	0.023105	0.0544256	0.0209645	0.0321163	0.145563	0.049882	0.0237766	0.0374843	0.0428247	0.0207373	0.0943754	0.0221872	0.0499857	0.0332085	0.104598	0.0259476	0.0399327	0.0271092	0.0242027	0.0287621	0.0288207	0.0483494	0.0474027	0.0313739	0.0251449	0.037582	0.0273691	0.0565022	0.0804254	0.0934381	0.0489335	0.0459158	0.056864	0.0409408	0.0321272	0.0408098	0.0405649	0.0918706
PROCHLORPERAZINE	0.0258293	0.0523418	0.0291421	0.0404903	0.0472249	0.0384864	0.0306732	0.0822041	0.0799003	0.0795629	0.0323007	0.0359021	0.0375422	0.0475315	0.0360425	0.0539966	0.045077	0.0400695	0.105104	0.289819	0.0362752	0.0856007	0.0379509	0.0932696	0.166836	0.0358863	0.0717472	0.0871061	0.0917976	0.0424522	0.0676903	0.0783697	0.0235779	0.0370715	0.0392903	0.0473403	0.0419079	0.0697243	0.0317947	0.0765951	0.114381	0.145409	0.0497124	0.0190162	0.103312	0.0385575	0.0318668	0.0970853	0.0878274
PURMORPHAMINE	0.0375716	0.102392	0.0508597	0.0193473	0.118821	0.0593973	0.0949191	0.0527766	0.0550508	0.0501737	0.0328673	0.0724789	0.0674483	0.0551881	0.0494528	0.061065	0.0458969	0.0946828	0.023847	0.0419966	0.0520059	0.0784479	0.0356147	0.0810365	0.0532211	0.0561279	0.0625101	0.0477812	0.0370244	0.0994373	0.0455358	0.0778758	0.063437	0.0587279	0.0866914	0.131923	0.146364	0.0433502	0.106598	0.0222767	0.0178617	0.0338472	0.0765841	0.142557	0.066215	0.0899933	0.131196	0.0432105	0.0522917
PX12	0.0129016	0.0651655	0.0489513	0.0296499	0.0486355	0.122453	0.0234917	0.0522164	0.118355	0.0854126	0.0404328	0.0656286	0.0317667	0.0982302	0.0708342	0.0392206	0.0601174	0.0444084	0.141245	0.138828	0.0669745	0.0229299	0.0553445	0.0570154	0.146394	0.0409812	0.0533662	0.0648239	0.127339	0.0546558	0.0425303	0.0592736	0.032854	0.0517673	0.054274	0.0273402	0.0602376	0.0695771	0.0421492	0.068425	0.0920522	0.0825472	0.0630771	0.0326111	0.0697094	0.0659385	0.0381654	0.105925	0.0308475
PYRAZOLANTHRONE	0.0186253	0.0638954	0.0389536	0.0655187	0.0579733	0.209989	0.0208596	0.177836	0.0629924	0.0798168	0.0982943	0.102322	0.0570893	0.0805244	0.0674933	0.0704302	0.0749917	0.0584772	0.142058	0.0590109	0.0232576	0.0573383	0.0472527	0.0980029	0.0330511	0.0583864	0.0540426	0.215418	0.144195	0.0297408	0.0897541	0.0953347	0.0468962	0.0458933	0.0423755	0.106909	0.0678631	0.139916	0.0411665	0.0786486	0.0987257	0.0809481	0.0415361	0.055327	0.0577852	0.0363463	0.069635	0.0608294	0.0587958
QS11	0.0479622	0.0311828	0.0316842	0.00974486	0.0433098	0.0197164	0.0260804	0.04264	0.0189244	0.0677184	0.0566705	0.0362914	0.20251	0.0402638	0.02314	0.0634381	0.0368147	0.0264977	0.0195324	0.0368453	0.0264587	0.018828	0.0328796	0.0600345	0.0408259	0.0566199	0.040409	0.0116953	0.0230874	0.0308455	0.0413651	0.0255364	0.0206024	0.0254969	0.040871	0.0114334	0.0160297	0.0396579	0.0118197	0.0238757	0.0266984	0.0537944	0.0570281	0.0158332	0.0289154	0.0572966	0.0138608	0.102277	0.27382
QUIZARTINIB	0.0185389	0.0573691	0.0493229	0.0234075	0.0576223	0.0544027	0.0401202	0.141067	0.0460998	0.0648214	0.0634413	0.213143	0.0694154	0.0570328	0.0521046	0.0491318	0.0502107	0.0540813	0.0673883	0.0503053	0.0156272	0.0846113	0.0255741	0.144853	0.0508842	0.0879194	0.0550958	0.0525118	0.0516178	0.0457144	0.0347357	0.0994943	0.0699782	0.0542347	0.0416453	0.0756911	0.0701304	0.0164444	0.0563231	0.0392534	0.0342357	0.039306	0.0449681	0.0931553	0.0556566	0.0456338	0.0713972	0.043463	0.0508273
RG108	0.031693	0.0618382	0.0734379	0.0238406	0.0703133	0.0889805	0.0293407	0.0796206	0.0791656	0.0549645	0.0614339	0.0919157	0.0556946	0.0878558	0.0342426	0.0692122	0.0674964	0.0457793	0.0820473	0.0701227	0.062225	0.0479307	0.0536533	0.0936411	0.0751113	0.056901	0.0598296	0.0577694	0.0803168	0.0603618	0.0356296	0.0424321	0.0428683	0.0654881	0.0652378	0.091347	0.131476	0.117724	0.101326	0.0449044	0.0653672	0.0803602	0.0504295	0.0825377	0.1002	0.0501084	0.0475065	0.0488001	0.0791099
RITA	0.0361549	0.0978185	0.050861	0.0440858	0.0688621	0.0600093	0.0405793	0.0693885	0.0620492	0.0673719	0.0459509	0.0466552	0.0803982	0.0855881	0.063205	0.0471377	0.0493342	0.0875135	0.0573668	0.056412	0.053661	0.0642403	0.0423065	0.0544438	0.0731116	0.0688613	0.0446664	0.0404298	0.0689163	0.0459501	0.0454946	0.0321383	0.0567261	0.072687	0.111542	0.155986	0.0905087	0.117974	0.1129	0.0416275	0.0324336	0.0521876	0.0658619	0.141454	0.0762524	0.0757288	0.101959	0.0445235	0.0445924
RUXOLITINIB	0.0304448	0.0508909	0.0600336	0.0445937	0.0642198	0.0753503	0.0624633	0.0608358	0.0484288	0.081294	0.0835367	0.0795797	0.0644975	0.0679624	0.0381442	0.0934192	0.0886906	0.0628941	0.0844501	0.0631307	0.0342508	0.0645933	0.0594777	0.057387	0.037314	0.103459	0.0646008	0.127282	0.0859988	0.0434647	0.0594754	0.0456769	0.0523751	0.0901136	0.0379068	0.106763	0.0929659	0.0176405	0.110626	0.0772659	0.0747606	0.0512035	0.0341891	0.0859059	0.0510552	0.0296784	0.151184	0.0568508	0.0542206
SALERMIDE	0.0151251	0.0911359	0.0464864	0.0290665	0.137234	0.0284016	0.020157	0.233151	0.074429	0.0389168	0.0964941	0.0244149	0.0410221	0.0322782	0.0505887	0.037105	0.0296899	0.0285129	0.027955	0.0468565	0.0440766	0.164502	0.0193859	0.211645	0.0328154	0.0262151	0.040915	0.0433246	0.0331254	0.0315411	0.0450123	0.0838436	0.0212179	0.0270745	0.0488993	0.019668	0.0274834	0.0207123	0.0242687	0.0275694	0.048436	0.0556127	0.0490206	0.0194758	0.0281768	0.0474422	0.0200171	0.0292141	0.0319667
SARACATINIB	0.0477537	0.026103	0.0422143	0.490495	0.0446295	0.0304347	0.0151173	0.0286703	0.0325322	0.0333109	0.0426699	0.0184209	0.0254104	0.0288789	0.0660186	0.0284682	0.108447	0.0386602	0.0358328	0.0659214	0.0237381	0.0255444	0.0193699	0.0379996	0.04054	0.0332976	0.0240917	0.0916154	0.0303124	0.0327039	0.269302	0.0231048	0.0341772	0.0381582	0.0322129	0.039769	0.0760988	0.0266627	0.0515577	0.0557423	0.0674156	0.0734098	0.024537	0.0372194	0.0371288	0.0196967	0.0489471	0.042189	0.0200866
SB225002	0.02739	0.0340702	0.0235883	0.0120995	0.0199894	0.250863	0.195872	0.0637405	0.0659228	0.105369	0.0415272	0.124096	0.0457115	0.0707368	0.0332207	0.045341	0.0605568	0.0644017	0.0976729	0.031407	0.147058	0.0186969	0.297531	0.0593975	0.0421964	0.0201247	0.122956	0.0181955	0.0406101	0.0720313	0.0323678	0.0950147	0.0118646	0.0399575	0.0222964	0.0304099	0.0150596	0.0140226	0.0132952	0.0121139	0.0208896	0.0357994	0.021902	0.00731861	0.0773794	0.0229618	0.00693387	0.0995404	0.0562045
SB431542	0.048369	0.0436561	0.0781387	0.0481136	0.0551704	0.0298796	0.0303613	0.0676845	0.0393137	0.0410735	0.0440125	0.0425817	0.0650533	0.110134	0.0431021	0.0432303	0.0473713	0.0441993	0.0337387	0.0523361	0.0265802	0.0622619	0.0309919	0.0943479	0.0718118	0.0579993	0.0468947	0.0527906	0.0543571	0.0508502	0.0561895	0.0242343	0.0786858	0.0693706	0.0859913	0.112809	0.0520004	0.0876029	0.0973536	0.0525001	0.043627	0.107696	0.0505616	0.0871573	0.0568098	0.0507917	0.159539	0.0384412	0.0544754
SB525334	0.0328175	0.075256	0.0737052	0.0342207	0.0647096	0.0870776	0.0450106	0.102225	0.0830854	0.045252	0.0532834	0.0670256	0.040836	0.141325	0.0560079	0.160077	0.0311044	0.0493972	0.0890545	0.0527045	0.0658668	0.118487	0.0374306	0.0754445	0.0434203	0.0716325	0.0382662	0.0863667	0.148684	0.0426981	0.0314518	0.0895202	0.0662013	0.0502817	0.051283	0.0522376	0.109671	0.115039	0.149413	0.0598518	0.0603593	0.0548022	0.0608343	0.116717	0.127338	0.0586805	0.108892	0.0633156	0.0661681
SCH79797	0.0213232	0.0348873	0.0345528	0.0342771	0.0327568	0.0712362	0.0815261	0.0373906	0.0634817	0.0564356	0.0320488	0.0487662	0.0400447	0.0531196	0.0186309	0.0629476	0.0890552	0.0394493	0.10686	0.111277	0.073486	0.0293579	0.121157	0.0551892	0.0871746	0.0510432	0.093125	0.0552968	0.0682908	0.044348	0.0816762	0.103686	0.0216969	0.0842348	0.0339661	0.0404661	0.0303784	0.0375482	0.0203447	0.0921327	0.0943744	0.0991218	0.0297115	0.0214826	0.0913032	0.0261323	0.0277759	0.0977719	0.0969244
SELUMETINIB	0.0414449	0.0494954	0.0404192	0.102877	0.0583583	0.0385254	0.0256039	0.0529733	0.0576817	0.0298769	0.0454011	0.0212924	0.0458624	0.0212153	0.05637	0.0470602	0.0434364	0.0437069	0.0552214	0.0726201	0.0333052	0.0585737	0.0219643	0.0686717	0.0464956	0.05635	0.0431619	0.13988	0.0752143	0.0546109	0.0880985	0.0183871	0.0479212	0.0398643	0.0418648	0.0843843	0.0612386	0.067371	0.0635361	0.0639585	0.0735411	0.0917866	0.0478024	0.0713181	0.0525471	0.0374713	0.0738205	0.0571081	0.0377521
SERDEMETAN	0.00601775	0.104721	0.0555589	0.0291988	0.0338926	0.115454	0.0756356	0.0292124	0.0822478	0.172883	0.0385385	0.123082	0.0483197	0.13535	0.0500479	0.0350168	0.0807958	0.16324	0.143812	0.137012	0.0955759	0.0258913	0.0626051	0.0408048	0.192262	0.0666199	0.133293	0.040313	0.108888	0.0376946	0.0438955	0.266958	0.0547201	0.0800749	0.057892	0.111422	0.0440507	0.0703335	0.0791832	0.0287151	0.0265584	0.0671408	0.0583321	0.0516319	0.0640935	0.0589865	0.0541702	0.0784325	0.0395057
SGX523	0.0295058	0.0614677	0.059338	0.0239676	0.0629863	0.0378408	0.0171453	0.0575169	0.0328059	0.0384853	0.0936324	0.0360966	0.0755626	0.0370218	0.0500458	0.0578883	0.0227329	0.0380554	0.0277788	0.0332561	0.0180467	0.0709904	0.0277208	0.0469008	0.0398748	0.127825	0.0303055	0.0267282	0.0421638	0.0431552	0.0260178	0.0733902	0.0675533	0.0599753	0.0533511	0.0887477	0.0996107	0.0198051	0.0748652	0.0490951	0.0314833	0.0385931	0.0732035	0.118093	0.0534292	0.0739591	0.135601	0.0383516	0.0451483
SID26681509	0.0274272	0.0685506	0.039758	0.0238684	0.0794697	0.0949249	0.0298383	0.126466	0.0671897	0.0773093	0.148757	0.0746261	0.0390662	0.114885	0.0576649	0.112051	0.0650078	0.0341033	0.0754748	0.0750227	0.0411492	0.10825	0.0604514	0.10144	0.039589	0.0477512	0.0538512	0.0870633	0.0626831	0.0860185	0.0383334	0.0613697	0.0400198	0.05973	0.0646339	0.058087	0.141731	0.100053	0.0457708	0.107715	0.120429	0.0653132	0.0664525	0.0430063	0.0703418	0.0668984	0.0490899	0.0708593	0.0534641
SILDENAFIL	0.118227	0.0503421	0.0412461	0.0263368	0.0641207	0.0195523	0.014323	0.0761093	0.0328098	0.0258291	0.106156	0.0204294	0.0493271	0.0419489	0.0432299	0.0646066	0.0414204	0.01949	0.0240386	0.0432702	0.0183056	0.0864935	0.0149316	0.0711164	0.0319535	0.0852024	0.0213163	0.0578154	0.0392899	0.0227183	0.0310665	0.00925081	0.0714419	0.034451	0.0634693	0.0244813	0.0424651	0.479111	0.0672113	0.0763098	0.0902472	0.0471647	0.0779142	0.12886	0.0438154	0.0727008	0.0871363	0.0448421	0.0692895
SIMVASTATIN	0.0118707	0.0873434	0.0536944	0.0345313	0.0655143	0.0554942	0.0240672	0.0464966	0.0496401	0.0519181	0.0972581	0.0341411	0.0314733	0.0475639	0.0532568	0.0750977	0.0473728	0.0421777	0.0408889	0.0358713	0.0434107	0.043126	0.0295512	0.0576557	0.0261271	0.0809445	0.0224094	0.0547801	0.0605278	0.0539222	0.0378153	0.0379411	0.0675661	0.103564	0.0868198	0.0948766	0.0779631	0.0850575	0.169462	0.150632	0.0913521	0.0992793	0.054053	0.134715	0.0717202	0.0496742	0.134605	0.0507802	0.0281087
SIROLIMUS	0.00657437	0.0539123	0.0535313	0.0372803	0.0716551	0.0870751	0.0285658	0.055452	0.127813	0.0965737	0.0474747	0.0453307	0.0352757	0.0940351	0.187269	0.0252325	0.0624477	0.39916	0.0523096	0.0818382	0.0593196	0.0264383	0.0310081	0.0535146	0.0809167	0.023371	0.0380849	0.0399619	0.042113	0.0356053	0.0531685	0.0855807	0.0457024	0.0454237	0.0944335	0.0535507	0.070153	0.0875218	0.051915	0.0495854	0.0352568	0.0697212	0.0568378	0.0474137	0.0498443	0.0451094	0.0637665	0.0621736	0.0234332
SITAGLIPTIN	0.0365082	0.0584708	0.04312	0.0262614	0.0627671	0.0229712	0.0176088	0.0596946	0.0677471	0.0151445	0.0444899	0.0160924	0.0728332	0.0296444	0.0697824	0.0525328	0.0169934	0.049135	0.0329089	0.025666	0.0179172	0.128511	0.0135598	0.0334275	0.0429484	0.207516	0.0145269	0.0233114	0.0351186	0.0274351	0.0187543	0.0171667	0.380451	0.0664577	0.0733976	0.089887	0.0977972	0.0291128	0.0956898	0.093326	0.061251	0.0447524	0.138105	0.191065	0.0580831	0.133312	0.223699	0.0246063	0.0254171
SJ172550	0.0778547	0.0496501	0.0503875	0.0354748	0.0514807	0.0200503	0.0232608	0.0397074	0.0264436	0.0341626	0.0532232	0.029415	0.06611	0.0252988	0.0325114	0.0977569	0.0310575	0.0280296	0.0484335	0.0516103	0.0205295	0.0720274	0.0160823	0.0770558	0.0323942	0.121341	0.0327554	0.0477004	0.0392088	0.0433547	0.0316436	0.0462375	0.067671	0.0651796	0.0255552	0.0504213	0.0573609	0.0218327	0.0973818	0.100355	0.0814932	0.0482171	0.0556676	0.157672	0.0925792	0.044029	0.0992993	0.0396787	0.076918
SN38	0.0121008	0.0482667	0.02617	0.0125837	0.0359948	0.145444	0.0452359	0.0645992	0.0593883	0.0679952	0.0370719	0.0836043	0.0304032	0.022691	0.0413949	0.0422169	0.0972658	0.0388864	0.0794766	0.0322342	0.0505841	0.0303762	0.0736389	0.0524628	0.035723	0.0129519	0.0629159	0.0383633	0.0392369	0.0591376	0.0353596	0.18317	0.0144323	0.0281857	0.0300111	0.0117153	0.0125274	0.03066	0.0136629	0.0157357	0.0307963	0.0413089	0.0299165	0.00544773	0.0495733	0.0322669	0.00618417	0.0634616	0.0571635
SORAFENIB	0.0454414	0.0724119	0.0579356	0.0146565	0.0687453	0.0848695	0.0586748	0.1253	0.0463209	0.0672064	0.0860195	0.216798	0.117578	0.0809912	0.0309916	0.0707954	0.0359608	0.058674	0.0383379	0.0359626	0.0445547	0.090545	0.0471696	0.152769	0.0362758	0.0296407	0.0767377	0.0356025	0.0338824	0.090988	0.0449187	0.0580342	0.0303232	0.0243434	0.0445636	0.0136913	0.0431998	0.0418488	0.0197978	0.0176607	0.0163494	0.0351536	0.0504197	0.0217206	0.0428599	0.0615201	0.0168501	0.04711	0.0929577
SRT1720	0.0113464	0.0546613	0.0489034	0.0374791	0.0380165	0.0298876	0.0536946	0.0432821	0.0356479	0.052078	0.0238884	0.036784	0.0283515	0.0472887	0.0295952	0.078364	0.0518251	0.0310806	0.0995067	0.107389	0.046249	0.0422293	0.0278945	0.0375912	0.134617	0.113211	0.0496365	0.0400946	0.0556207	0.0376139	0.0353939	0.063733	0.0355441	0.121597	0.0276648	0.368139	0.0718132	0.0411784	0.0741643	0.0944633	0.0916074	0.0734477	0.055973	0.0779097	0.083297	0.0478404	0.110697	0.0570065	0.0480249
STAUROSPORINE	0.0320878	0.0694118	0.0513201	0.037085	0.156795	0.0753249	0.0145935	0.066372	0.200545	0.0844441	0.0396929	0.0617511	0.018533	0.0256358	0.0651624	0.032793	0.113495	0.0639337	0.0352221	0.0808964	0.0148708	0.0510535	0.0400111	0.0772719	0.0758855	0.0452875	0.0550186	0.153749	0.0793186	0.0600404	0.0619971	0.0141966	0.0873707	0.114939	0.0619488	0.0470525	0.0997754	0.0251401	0.102523	0.15991	0.152723	0.0642466	0.0457142	0.102781	0.362459	0.0584178	0.0834677	0.027771	0.0294312
SU11274	0.0400218	0.0745515	0.0320415	0.0166755	0.0591254	0.142326	0.0367674	0.184909	0.051825	0.0660921	0.0539641	0.13482	0.0993146	0.0390247	0.0348195	0.112657	0.0441342	0.0460531	0.0927275	0.0552422	0.0428009	0.107389	0.0743754	0.112084	0.0416989	0.0808304	0.0600628	0.0690332	0.0692541	0.0622103	0.0476939	0.22974	0.0308834	0.0389515	0.0567608	0.0461061	0.038211	0.0720596	0.0388709	0.0505795	0.0494539	0.0577792	0.0570887	0.0370302	0.0710048	0.0615515	0.0594108	0.0625466	0.170845
SUNITINIB	0.0222374	0.0421184	0.0346718	0.0275619	0.0302386	0.0670876	0.0406824	0.0460131	0.0594236	0.164549	0.0409527	0.270656	0.0347409	0.0773779	0.0548625	0.0312934	0.183155	0.116161	0.0994609	0.120918	0.0270074	0.035517	0.0572591	0.0547124	0.204516	0.0363055	0.11357	0.214435	0.146068	0.0429018	0.0996511	0.0729611	0.0316784	0.0373168	0.0437507	0.0676112	0.0338348	0.0466184	0.0302181	0.0328626	0.047744	0.0816674	0.037344	0.0189738	0.05599	0.0312459	0.0194108	0.0917206	0.0562236
TACEDINALINE	0.156337	0.0657527	0.0767909	0.043561	0.0288763	0.0627328	0.0577541	0.0430435	0.221357	0.073399	0.0328903	0.0417232	0.0307613	0.128311	0.0712431	0.0242347	0.0701324	0.0988443	0.102235	0.151155	0.479937	0.0367585	0.0451117	0.0541113	0.0771202	0.0260666	0.0531677	0.0422393	0.0877232	0.0395373	0.0549752	0.0365074	0.026753	0.0509308	0.025	0.0195399	0.0273314	0.0566924	0.0241257	0.0379364	0.0562414	0.0689288	0.0488504	0.0193484	0.036148	0.0294441	0.0198877	0.102167	0.0422664
TACROLIMUS	0.0244288	0.0631526	0.0726984	0.0359071	0.0793398	0.108378	0.0186815	0.0948242	0.0527895	0.0774177	0.0748398	0.157008	0.0671024	0.0747801	0.0626993	0.0705209	0.0514386	0.0514089	0.0588944	0.0630525	0.0382216	0.0547543	0.0445815	0.124187	0.0456166	0.0217457	0.043134	0.0546157	0.0623954	0.0643939	0.0402548	0.17497	0.0309343	0.0731775	0.0505622	0.0666601	0.0847311	0.0931569	0.0306524	0.05785	0.0556453	0.0447439	0.046342	0.0224388	0.0556506	0.0471369	0.0230236	0.0549604	0.0536455
TAMOXIFEN	0.165996	0.080594	0.0429311	0.0384348	0.0813549	0.0369467	0.00803743	0.162442	0.0339954	0.0300567	0.0809245	0.0266337	0.0555871	0.0744542	0.0461541	0.0290137	0.0316037	0.0179869	0.0307561	0.0653533	0.0267666	0.090894	0.0194866	0.15355	0.0382969	0.0536599	0.0226814	0.0475336	0.0309556	0.0211615	0.0751505	0.100296	0.0265062	0.0151503	0.0415702	0.0128572	0.0163833	0.0338422	0.0174494	0.0584884	0.0871113	0.0424572	0.0579204	0.0201726	0.0231781	0.0524395	0.0168514	0.0348586	0.0629041
TANDUTINIB	0.0363109	0.0418547	0.0444109	0.0122164	0.0544785	0.0429086	0.0478312	0.0677624	0.0561224	0.118699	0.0432507	0.136734	0.0766667	0.0720949	0.042328	0.0182161	0.0486261	0.0937882	0.0249937	0.0331358	0.0274315	0.0524251	0.0344686	0.0778059	0.161846	0.0252465	0.116777	0.0291694	0.0344968	0.0758921	0.038276	0.0431929	0.0299383	0.0171434	0.0857115	0.0185792	0.0453945	0.0316744	0.0339413	0.00746016	0.00840079	0.0398466	0.0788364	0.024441	0.0406083	0.0920015	0.0164487	0.058319	0.0513152
TANESPIMYCIN	0.0452329	0.0322213	0.0411345	0.0712101	0.0515632	0.0781962	0.0731868	0.0601652	0.0683269	0.0819961	0.0803789	0.0883994	0.0653563	0.0491148	0.0581258	0.0612932	0.107356	0.0985786	0.0666901	0.0646977	0.0524874	0.0554057	0.110878	0.0632005	0.0506358	0.0234392	0.171561	0.0952101	0.0654105	0.0820579	0.0824857	0.0301863	0.0241348	0.0352675	0.0609715	0.0215125	0.0513594	0.167372	0.0305144	0.034629	0.0569565	0.0890637	0.0417922	0.013311	0.058604	0.0371643	0.0179883	0.112869	0.0786798
TEMOZOLOMIDE	0.105049	0.0552414	0.0646898	0.0254031	0.0564576	0.046671	0.0308321	0.0552873	0.0470874	0.0665137	0.060075	0.0490818	0.109554	0.119913	0.0472869	0.039435	0.0323379	0.0499322	0.0256316	0.0398361	0.0286988	0.0467877	0.0275061	0.0835816	0.0494039	0.0320379	0.0491129	0.0306363	0.0349644	0.0536303	0.0465173	0.0230714	0.0331971	0.0300186	0.0725899	0.0112501	0.0328271	0.0631437	0.0177099	0.0249505	0.0289226	0.0377156	0.0845473	0.014553	0.0548902	0.0867164	0.012101	0.0495633	0.0902816
TEMSIROLIMUS	0.0106037	0.0725884	0.0309056	0.0346616	0.0561009	0.127449	0.00829717	0.100173	0.109256	0.0793122	0.0283352	0.0637656	0.0310574	0.0166326	0.302224	0.0322252	0.0787491	0.597552	0.104605	0.120955	0.00849355	0.0390276	0.0261489	0.0560214	0.071954	0.0335998	0.0387473	0.066756	0.0593167	0.0390492	0.0508403	0.00801759	0.0418754	0.0644757	0.0536546	0.0354039	0.0286005	0.0162392	0.0439398	0.0855747	0.132423	0.053136	0.0752343	0.0334799	0.049387	0.0700314	0.033617	0.0450221	0.0223554
TENIPOSIDE	0.0116061	0.0586433	0.0309662	0.0140004	0.0263883	0.373313	0.00518301	0.0316402	0.138868	0.0958343	0.0215327	0.145495	0.0351898	0.0116505	0.0309985	0.067088	0.113049	0.0941976	0.248	0.059172	0.00532693	0.0184244	0.237587	0.043825	0.0387498	0.0117796	0.0413231	0.0420512	0.0569177	0.0714516	0.0305372	0.00497904	0.0141351	0.0513165	0.0572977	0.011689	0.0180246	0.0113319	0.0148935	0.0307063	0.0999808	0.0453912	0.0410325	0.00749525	0.0629167	0.0395745	0.00845617	0.0890088	0.0610642
TG100115	0.0566426	0.0779715	0.0439386	0.0462098	0.0669269	0.0274776	0.0115655	0.0462841	0.0425537	0.0327645	0.0771555	0.0236038	0.035883	0.0445704	0.136669	0.0484737	0.0507522	0.0266868	0.0400117	0.0702464	0.0275509	0.0376438	0.0171872	0.0441729	0.0435207	0.0862094	0.0208603	0.0427197	0.0329993	0.0199178	0.0369731	0.132916	0.0553982	0.0455837	0.0466499	0.0976846	0.071203	0.0904553	0.221414	0.0494699	0.100375	0.041773	0.0625184	0.163481	0.0367142	0.0500138	0.133083	0.0315551	0.0351238
TG101348	0.0267859	0.0527835	0.03529	0.0628913	0.0366721	0.0759096	0.0146168	0.0437221	0.0935114	0.0926607	0.0443559	0.0527828	0.0194086	0.124969	0.0655223	0.0333688	0.156138	0.0373239	0.120139	0.19996	0.0234082	0.0307994	0.0519495	0.0510159	0.112707	0.04694	0.046279	0.35248	0.202588	0.0192754	0.100601	0.0277058	0.0368302	0.0551178	0.0398817	0.115882	0.0808964	0.0408307	0.0694687	0.150102	0.218165	0.150297	0.034234	0.0564564	0.0648437	0.0245486	0.0843757	0.0751429	0.0472336
TGX221	0.026087	0.0769069	0.0407942	0.0397145	0.0707726	0.0325153	0.00772728	0.0574489	0.0384163	0.0441556	0.0680414	0.0188601	0.0280183	0.0316772	0.431865	0.0335757	0.0480909	0.0334084	0.0267779	0.0660131	0.0150071	0.0412383	0.012593	0.0469621	0.0350406	0.0478013	0.0189985	0.0532525	0.0241812	0.0203647	0.043148	0.0753013	0.0604345	0.0384125	0.0761298	0.0609864	0.0446671	0.0212697	0.108872	0.0896963	0.109199	0.0550854	0.0479613	0.0677445	0.0413896	0.0394311	0.0750406	0.0321066	0.0233728
THALIDOMIDE	0.0529492	0.0594093	0.0662164	0.0556739	0.166078	0.0350358	0.0208099	0.0526405	0.0556747	0.0318423	0.0658923	0.0218546	0.0879426	0.0602401	0.0469884	0.0369546	0.034683	0.0253449	0.0269911	0.0384434	0.0317836	0.0447815	0.0224603	0.0937453	0.0554026	0.0437978	0.0242693	0.0426894	0.0418894	0.0418953	0.0529112	0.0207267	0.0690112	0.0500021	0.107162	0.0353913	0.0453684	0.101484	0.0413539	0.0538472	0.0712844	0.0912567	0.0626443	0.0351357	0.0763931	0.0518854	0.0358541	0.0370351	0.0486912
TIGECYCLINE	0.0181897	0.0618716	0.0492388	0.0354927	0.0670903	0.049921	0.02017	0.0850711	0.0717642	0.04248	0.0483467	0.0408853	0.0420343	0.0329425	0.0844824	0.107979	0.050394	0.0653663	0.0343701	0.124909	0.020502	0.128038	0.0349942	0.0268172	0.050427	0.031739	0.0194188	0.0509281	0.037842	0.0276029	0.0300987	0.0196937	0.0749644	0.0475131	0.144197	0.0254988	0.0189417	0.0323849	0.0274182	0.0996983	0.0749875	0.0520407	0.0753669	0.027153	0.0326399	0.0691073	0.0270914	0.032132	0.0202179
TIPIFARNIBP2	0.00414136	0.171347	0.0643776	0.0705195	0.0742686	0.316576	0.00864949	0.0677381	0.124943	0.131103	0.0290389	0.11519	0.0291352	0.0171676	0.0801787	0.0433006	0.0688188	0.118594	0.288632	0.122532	0.00885115	0.0370103	0.0810628	0.0540407	0.0983071	0.0687781	0.0545752	0.117502	0.167551	0.0513782	0.0755654	0.00836227	0.0586291	0.297056	0.106804	0.227982	0.0653917	0.0167671	0.0595654	0.145432	0.120219	0.103569	0.0683087	0.0512053	0.098174	0.0710159	0.0717363	0.0520518	0.0190075
TIVANTINIB	0.014184	0.0225999	0.0204992	0.0248311	0.0174018	0.415838	0.17054	0.0378493	0.132648	0.108879	0.0337483	0.0629529	0.0183824	0.0606829	0.0435497	0.0280499	0.191639	0.0827325	0.181852	0.0276248	0.170403	0.0221552	0.596543	0.094662	0.0761376	0.00961628	0.15838	0.053294	0.125265	0.0715086	0.0618288	0.0648477	0.0161111	0.02385	0.0139294	0.00614704	0.0103431	0.0263971	0.00853383	0.00577827	0.0224023	0.0625161	0.0096294	0.00605296	0.0469587	0.00703259	0.00631912	0.0987988	0.0247683
TIVOZANIB	0.137221	0.0523481	0.045282	0.0151604	0.0436464	0.0770639	0.0394334	0.0601536	0.0633165	0.0614402	0.0697705	0.398223	0.0693763	0.22136	0.0445816	0.0477877	0.0605977	0.0598715	0.0552934	0.02974	0.0331047	0.036976	0.0310519	0.0787133	0.05104	0.0196856	0.0413733	0.0343251	0.0500104	0.0766068	0.0352895	0.0512673	0.02893	0.0631593	0.0414444	0.0373723	0.0636225	0.038699	0.0264889	0.0192362	0.0216472	0.0355958	0.0386806	0.019758	0.0559161	0.0358755	0.0154387	0.0534034	0.10568
TOPOTECAN	0.00872553	0.0541756	0.0339574	0.0158681	0.0370767	0.188313	0.0968632	0.0576668	0.0752792	0.0771529	0.0322913	0.0804339	0.0339893	0.0298649	0.0486067	0.0319454	0.114282	0.0600729	0.0932671	0.0394052	0.105003	0.0357379	0.130062	0.0733373	0.0695311	0.0131051	0.069023	0.034479	0.0513341	0.0745906	0.0441906	0.153076	0.0130736	0.0304018	0.0262616	0.010471	0.0130386	0.0201424	0.0164051	0.0118	0.0239219	0.0373289	0.0263863	0.0072759	0.0358885	0.0280842	0.00846169	0.053989	0.035913
TOSEDOSTAT	0.012639	0.10091	0.0545648	0.0756906	0.0669864	0.070013	0.0822148	0.0711086	0.0941093	0.0545903	0.0727169	0.032965	0.0401083	0.0635305	0.0663818	0.0721513	0.0640269	0.0610204	0.0847306	0.0774598	0.0651427	0.0453714	0.0461242	0.0778234	0.0553569	0.0471536	0.0510132	0.0715564	0.0867305	0.0530725	0.0575099	0.099035	0.0682796	0.0770817	0.049439	0.10095	0.0842948	0.0699275	0.114637	0.0633003	0.0837702	0.0895546	0.1135	0.104282	0.0685099	0.0798504	0.0948895	0.058001	0.0322491
TPCA1	0.0148371	0.059783	0.0541243	0.0876659	0.0325001	0.152466	0.0935753	0.054725	0.0646743	0.0886561	0.0435066	0.0900925	0.024656	0.127967	0.0535684	0.0808712	0.1361	0.101687	0.312926	0.130159	0.0654717	0.0364506	0.0609667	0.0789119	0.0850906	0.0302526	0.0598877	0.275195	0.236477	0.0378373	0.0889981	0.128573	0.0439941	0.0809796	0.0292474	0.0552703	0.066145	0.0186152	0.0499442	0.095495	0.0780814	0.0910594	0.030098	0.0509569	0.063861	0.0210508	0.0460916	0.0961019	0.0363641
TRAMETINIB	0.0427735	0.0368067	0.0458342	0.0667691	0.0602966	0.0205679	0.0392874	0.0377294	0.0769476	0.024721	0.0427716	0.0167353	0.0398036	0.0226223	0.0463161	0.0393813	0.0582946	0.0455963	0.0259618	0.0780021	0.0624277	0.0665245	0.028036	0.0382865	0.0718606	0.0343436	0.0341608	0.110426	0.0611923	0.0700147	0.0851709	0.0192495	0.0384116	0.0330647	0.040496	0.0268111	0.0357747	0.0544333	0.0321309	0.0467608	0.0356544	0.112927	0.0453423	0.0265857	0.0558153	0.0341297	0.0272196	0.050857	0.0512633
TRETINOIN	0.0247497	0.0771502	0.129006	0.0463262	0.0880346	0.10395	0.0287527	0.241922	0.12272	0.0599549	0.0378084	0.0859778	0.0519474	0.111018	0.0806713	0.0470016	0.057024	0.0802465	0.0868455	0.0686091	0.0585997	0.0519666	0.0462945	0.0865996	0.0509748	0.046586	0.0481409	0.0636229	0.0796902	0.0468535	0.0501947	0.108602	0.0746539	0.0582231	0.119929	0.0980103	0.101825	0.0397525	0.137439	0.0798397	0.0983633	0.0680403	0.0490469	0.0901297	0.0603873	0.0489455	0.0680787	0.0457188	0.0335925
TRIFLUOPERAZINE	0.0200481	0.0445871	0.0325905	0.0506865	0.0513499	0.0305393	0.0223642	0.0483723	0.0571586	0.0518517	0.0284849	0.0318452	0.0396255	0.0339453	0.0350599	0.0405681	0.0459852	0.0454523	0.0677493	0.176944	0.0266761	0.0659605	0.0335674	0.100326	0.135487	0.0469364	0.0695965	0.0684747	0.0812416	0.0400619	0.0650867	0.0205839	0.0406738	0.0469576	0.0708053	0.0719102	0.0614235	0.352928	0.0529608	0.0875268	0.0751928	0.148618	0.0456396	0.060518	0.0782653	0.0434884	0.0809501	0.0712061	0.0598958
TRIPTOLIDE	0.0130308	0.0452249	0.0343979	0.0437702	0.0896195	0.0668103	0.129041	0.0521508	0.124001	0.0647739	0.0340355	0.0454877	0.0505931	0.0593972	0.0433345	0.0418601	0.0795453	0.107732	0.044329	0.0595447	0.0704298	0.0510257	0.07262	0.0502521	0.097052	0.0749866	0.154502	0.051339	0.0542335	0.0720852	0.0821596	0.0175388	0.0780383	0.0436092	0.126675	0.0825942	0.130865	0.0711385	0.111178	0.0519004	0.0376739	0.105504	0.055871	0.0645187	0.0725785	0.060245	0.0749594	0.0956177	0.0460709
TUBASTATINA	0.00605314	0.229065	0.115454	0.0392388	0.040976	0.0568385	0.0153841	0.0607141	0.0925087	0.0565283	0.0409815	0.0400705	0.0316006	0.0267018	0.0672056	0.0502043	0.0403306	0.0406948	0.0596442	0.061457	0.01567	0.0350162	0.025118	0.0489634	0.0666488	0.095882	0.0537012	0.0621623	0.0687264	0.0430106	0.0632967	0.0149749	0.0853474	0.269972	0.0454831	0.370705	0.0539969	0.0261961	0.108706	0.0730932	0.117648	0.0896168	0.0656854	0.070745	0.0666498	0.0683231	0.05932	0.0403542	0.025022
TW37	0.0705781	0.0698893	0.0396564	0.0243589	0.0542422	0.150441	0.0824564	0.149087	0.094561	0.0494371	0.0487598	0.091193	0.0668664	0.0376189	0.0602593	0.048632	0.0559212	0.12807	0.0363084	0.0296589	0.150862	0.081447	0.095835	0.130821	0.0301331	0.0306109	0.0945512	0.0438363	0.0500646	0.103505	0.0605344	0.250106	0.0243075	0.0279384	0.0637013	0.0250181	0.0301147	0.0207885	0.0261563	0.0136561	0.0205813	0.0345839	0.0438416	0.0224412	0.0535513	0.0469376	0.0235827	0.0769275	0.080745
UNC0321	0.023545	0.0577483	0.0918493	0.0617872	0.072862	0.0288235	0.0108959	0.0747391	0.0305316	0.0362962	0.0730789	0.0217752	0.0441945	0.106044	0.0459206	0.0357396	0.0262865	0.0208325	0.0268746	0.037823	0.0116699	0.0678951	0.0214536	0.0779768	0.0281602	0.158042	0.0237918	0.0587264	0.0422381	0.0252672	0.0412421	0.0223699	0.0720366	0.0462876	0.0961244	0.400419	0.181048	0.0328798	0.147742	0.108726	0.0714348	0.0508112	0.0735441	0.224061	0.0354625	0.0897362	0.177171	0.0317294	0.0311478
VALDECOXIB	0.0179319	0.0870221	0.040648	0.0385934	0.059146	0.0665136	0.0418809	0.0877554	0.0653239	0.0450063	0.0580367	0.0527023	0.0485341	0.0975658	0.0503678	0.389292	0.0403197	0.056764	0.0528015	0.0614153	0.0669198	0.0552576	0.056154	0.0700323	0.0317632	0.0693368	0.0386606	0.0468749	0.0425176	0.0472459	0.0308519	0.082476	0.0601851	0.102416	0.082985	0.0890794	0.0534206	0.0904338	0.0861529	0.0669497	0.0887528	0.0612468	0.0620248	0.0522443	0.0639399	0.0529708	0.048015	0.0530033	0.070241
VELIPARIB	0.0112965	0.0617386	0.0722402	0.0498508	0.0644687	0.0469539	0.039855	0.0443191	0.0446962	0.042353	0.0634469	0.0386186	0.0399941	0.0636294	0.0519476	0.0475704	0.0460731	0.0334773	0.0591122	0.0553646	0.0272234	0.056918	0.0237521	0.0671089	0.0386082	0.0889901	0.0382821	0.0637501	0.0839763	0.043366	0.0320688	0.0450286	0.092733	0.129391	0.0680938	0.207269	0.0899424	0.117273	0.148517	0.0923394	0.066001	0.0778301	0.0428856	0.113187	0.0764427	0.0388117	0.103306	0.0432521	0.0407083
VER155008	0.0186706	0.0412022	0.0749598	0.0746849	0.0850599	0.0540093	0.0246858	0.0429601	0.0636394	0.0279858	0.110214	0.0323211	0.0456658	0.0453454	0.0400857	0.0511461	0.0294675	0.0425616	0.0347083	0.0375348	0.0254329	0.0537736	0.0309832	0.0539706	0.0280713	0.172911	0.0302119	0.080787	0.0580128	0.0485022	0.0709475	0.0344548	0.0997256	0.0985884	0.103939	0.247411	0.187806	0.0281454	0.316193	0.142019	0.0820841	0.0771556	0.0582702	0.262044	0.0704846	0.0496069	0.224717	0.0357125	0.030744
VINCRISTINE	0.0104348	0.0259423	0.0200981	0.0148749	0.0242451	0.171567	0.294064	0.0415435	0.0876375	0.0985438	0.0273816	0.0979284	0.028785	0.0448749	0.0200904	0.0319371	0.0963814	0.0847193	0.0926483	0.0304794	0.113113	0.0202267	0.64632	0.0475792	0.0536332	0.0111479	0.201757	0.0243896	0.0450063	0.104263	0.047362	0.0497447	0.0124408	0.0282596	0.0293293	0.0125985	0.0132243	0.0112655	0.0111502	0.00908129	0.0167621	0.0514023	0.0262497	0.00633031	0.0331164	0.0223448	0.00727141	0.121914	0.0372671
VORINOSTAT	0.0111892	0.0644493	0.0380709	0.0540433	0.0268801	0.0805838	0.0641903	0.055871	0.476464	0.0584207	0.0306893	0.0378791	0.0295435	0.0625925	0.038489	0.060496	0.0695523	0.0557804	0.113829	0.115295	0.869141	0.0384974	0.0843862	0.0823211	0.0811821	0.0222194	0.071471	0.070108	0.10606	0.0483139	0.05512	0.0899856	0.0243949	0.0385231	0.0212976	0.0504774	0.0424767	0.0929641	0.0485965	0.0639197	0.157372	0.103407	0.0326115	0.0376798	0.0913677	0.02683	0.0327845	0.122277	0.0562666
WZ4002	0.0176459	0.0642359	0.0413628	0.605311	0.0639377	0.0594081	0.0231088	0.0681965	0.079353	0.078774	0.0471478	0.016492	0.0288389	0.0622802	0.126146	0.0169609	0.0538018	0.036773	0.0461301	0.113884	0.0399902	0.0519424	0.0166384	0.0663026	0.0605961	0.0194235	0.0316284	0.0738168	0.0539655	0.0230687	0.228732	0.0873605	0.0254249	0.0185279	0.0429907	0.0139195	0.0205139	0.0879306	0.0177643	0.0358569	0.0558654	0.0699598	0.0407596	0.0137615	0.0296055	0.0383968	0.0142071	0.0743417	0.0173487
YK4279	0.0106057	0.0459986	0.0393405	0.0297191	0.0224028	0.268275	0.170984	0.0394338	0.0795155	0.0901478	0.0299703	0.0625005	0.0223522	0.0637151	0.0254694	0.0520104	0.10674	0.0700498	0.201117	0.0561645	0.0907034	0.0138537	0.284187	0.0510225	0.0578103	0.0270116	0.0980765	0.0514415	0.0993426	0.0642923	0.0551704	0.0848703	0.0243131	0.0605098	0.021959	0.064524	0.0370417	0.0169552	0.025263	0.0201771	0.0299585	0.0563746	0.0221717	0.0239306	0.0684878	0.0174984	0.0263019	0.0894858	0.0310027
YM155	0.0339623	0.0371241	0.0479884	0.0229221	0.06145	0.0556644	0.0758607	0.0882793	0.0706905	0.0493313	0.103453	0.0426044	0.0625334	0.0457121	0.050026	0.0713063	0.0492844	0.0516658	0.0441164	0.0418722	0.0623342	0.0757286	0.0498083	0.0991559	0.0495134	0.0341748	0.063623	0.032656	0.0303385	0.0907357	0.0393093	0.226828	0.0328684	0.046422	0.0400202	0.0333355	0.0440355	0.0829599	0.0522608	0.0269014	0.0575573	0.0502751	0.0795958	0.0337066	0.067575	0.0829925	0.0321684	0.0470983	0.0770037
ZEBULARINE	0.0927192	0.0414283	0.0471783	0.0280888	0.0573456	0.0579553	0.0367538	0.0439935	0.0410116	0.0767235	0.0988253	0.0656506	0.134838	0.071026	0.0240075	0.0838562	0.0445228	0.0386977	0.0541007	0.0464429	0.0428963	0.0561254	0.0629016	0.0620151	0.0381237	0.0273354	0.0482307	0.0378851	0.0473862	0.0507294	0.0527446	0.0653801	0.0330932	0.0500473	0.0608491	0.0322934	0.0353169	0.0700647	0.0233721	0.0423776	0.0511154	0.05429	0.0579757	0.0149398	0.134547	0.0527435	0.0125167	0.0742496	0.142958
ZSTK474	0.00893042	0.0801747	0.0425533	0.0443921	0.062253	0.121492	0.0140432	0.119899	0.0640072	0.0708776	0.0460152	0.0436757	0.0283807	0.143269	0.388697	0.0242149	0.0581312	0.110115	0.0500807	0.0759738	0.0277181	0.0442715	0.0199076	0.102283	0.0544451	0.0252557	0.049935	0.10897	0.0711331	0.0291676	0.0662102	0.169318	0.0294265	0.0294691	0.0453016	0.0537034	0.0253925	0.0407487	0.0364517	0.0373705	0.0575618	0.0460759	0.0604642	0.0237031	0.0484314	0.0515664	0.0286298	0.0422234	0.0247742
[truncated: 190 more columns]

## Sheet: D) Structure(CTRPv2)
	ABIRATERONE	ABT737	AC55649	AFATINIB	AGK2	ALISERTIB	ALVOCIDIB	AM580	APICIDIN	AT7867	AVICIND	AXITINIB	AZACITIDINE	AZD1480	AZD6482	AZD7545	AZD7762	AZD8055	BARASERTIB	BAXCHANNELBLOCKER	BELINOSTAT	BETULINICACID	BI2536	BIBR1532	BIX01294	BLEBBISTATIN	BMS345541	BMS536924	BMS754807	BORTEZOMIB	BOSUTINIB	BRDK01737880	BRDK02492147	BRDK13999467	BRDK14844214	BRDK27224038	BRDK27986637	BRDK33514849	BRDK49290616	BRDK50799972	BRDK55116708	BRDK63431240	BRDK71935468	BRDK86535717	BRDK88742110	BRDK94991378	BRDK96431673	BREFELDINA	BRIVANIB
ABIRATERONE	1.72762	0.069329	0.126371	0.0644488	0.100581	0.0837777	0.108915	0.0980592	0.129137	0.100847	0.0724627	0.119619	0.0655655	0.0689627	0.0754691	0.0655306	0.0710462	0.0773999	0.0685037	0.117601	0.0870208	0.127689	0.064742	0.100859	0.0688267	0.0990353	0.094656	0.089358	0.0750596	0.0852976	0.0843753	0.0596705	0.0766357	0.0707692	0.0687064	0.0943139	0.0693134	0.0650796	0.0827344	0.10724	0.0637971	0.0650796	0.0765647	0.0684291	0.100197	0.0730529	0.0670525	0.0918307	0.0938988
ABT737	0.069329	1.75739	0.0770113	0.0721438	0.113446	0.135734	0.0846433	0.106878	0.0878619	0.106516	0.0581302	0.104833	0.0730213	0.0748531	0.104235	0.168191	0.120327	0.0702538	0.0733646	0.0887135	0.134372	0.05195	0.149911	0.088673	0.100619	0.114601	0.0738915	0.0965086	0.104693	0.0910772	0.0925601	0.0914113	0.13564	0.113776	0.119871	0.0925545	0.092265	0.112999	0.0886132	0.137718	0.102216	0.112999	0.11234	0.0802091	0.0829211	0.1101	0.0918616	0.0448071	0.0741531
AC55649	0.126371	0.0770113	1.86995	0.0462043	0.0766109	0.0782372	0.0887971	0.219591	0.0752732	0.16148	0.0413685	0.0881743	0.0566114	0.0492028	0.0650716	0.0818604	0.0853874	0.0584294	0.0472271	0.0698051	0.0769807	0.0960394	0.0560537	0.126378	0.0439731	0.0888692	0.0581214	0.0680961	0.0528453	0.0843965	0.0515224	0.0573781	0.0591035	0.0561199	0.0584693	0.0635862	0.0600445	0.0480717	0.0702128	0.0741973	0.0637742	0.0480717	0.0585241	0.0639056	0.0827982	0.0589338	0.0605303	0.0629791	0.0607803
AFATINIB	0.0644488	0.0721438	0.0462043	2.1665	0.112528	0.120098	0.0973386	0.0674239	0.0581975	0.0748987	0.0553926	0.0786533	0.073246	0.106015	0.0780615	0.0813007	0.0646249	0.109233	0.226404	0.0671434	0.0681448	0.0422294	0.134343	0.0946367	0.129677	0.0782391	0.0756279	0.124184	0.121526	0.0634771	0.125379	0.0779852	0.0827542	0.08322	0.0675609	0.077776	0.0761406	0.0861841	0.096761	0.0697828	0.099292	0.0861841	0.106159	0.0810289	0.0740071	0.0921129	0.0691326	0.0379135	0.117875
AGK2	0.100581	0.113446	0.0766109	0.112528	1.7385	0.0984866	0.106894	0.0922252	0.096204	0.111361	0.0605555	0.133827	0.0733472	0.0842962	0.116182	0.134628	0.102089	0.103289	0.0999841	0.107066	0.114575	0.0574896	0.0901348	0.17842	0.0909833	0.100424	0.0893261	0.144585	0.112258	0.0879737	0.122329	0.0899307	0.0893795	0.0908586	0.0819614	0.0960004	0.0935802	0.096448	0.0812533	0.0942613	0.0967987	0.096448	0.0883848	0.0719682	0.0869053	0.0859352	0.0708136	0.0484832	0.0895557
ALISERTIB	0.0837777	0.135734	0.0782372	0.120098	0.0984866	1.75368	0.103635	0.0927945	0.0701935	0.0975577	0.0516593	0.0948778	0.0748525	0.0988473	0.113423	0.0936409	0.0977455	0.146106	0.106165	0.0763363	0.0818846	0.0517034	0.124854	0.0886995	0.0955108	0.107594	0.0976918	0.1188	0.110142	0.0775753	0.0969549	0.0853608	0.0792531	0.085664	0.0867144	0.0952459	0.0893638	0.0826883	0.102469	0.127691	0.0881237	0.0826883	0.120765	0.078761	0.10022	0.103957	0.0736603	0.042064	0.116848
ALVOCIDIB	0.108915	0.0846433	0.0887971	0.0973386	0.106894	0.103635	1.81261	0.097853	0.0891835	0.12588	0.0812761	0.0975009	0.0937389	0.0621982	0.117363	0.0931153	0.0921859	0.0785985	0.0858441	0.0822827	0.0890425	0.0603004	0.0906179	0.108846	0.0725106	0.130821	0.0625617	0.12251	0.0828595	0.11941	0.096461	0.116619	0.0991382	0.0914685	0.0882744	0.106766	0.110736	0.084537	0.0979582	0.0958538	0.113433	0.084537	0.134841	0.130656	0.0826174	0.13071	0.12893	0.0541291	0.0914304
AM580	0.0980592	0.106878	0.219591	0.0674239	0.0922252	0.0927945	0.097853	2.05063	0.0774938	0.102849	0.0431532	0.103984	0.0631644	0.05549	0.0910102	0.13998	0.0947286	0.0700327	0.0664345	0.0764342	0.0793965	0.0592056	0.090266	0.223274	0.0765139	0.142243	0.0724989	0.0904238	0.0699121	0.0833429	0.0674045	0.10616	0.066586	0.0584682	0.0635575	0.0845848	0.0879114	0.0607802	0.0932548	0.0944714	0.134267	0.0607802	0.0963099	0.0901797	0.10069	0.0952326	0.0909139	0.0414448	0.0589645
APICIDIN	0.129137	0.0878619	0.0752732	0.0581975	0.096204	0.0701935	0.0891835	0.0774938	2.01757	0.12287	0.0618877	0.092554	0.0711558	0.0554232	0.0772383	0.0737396	0.0901212	0.0574749	0.0751514	0.128101	0.0712758	0.0537011	0.104953	0.0767981	0.0836335	0.110354	0.0851301	0.118827	0.0982127	0.253203	0.105589	0.0638135	0.0841535	0.106675	0.082746	0.103856	0.0852535	0.0706077	0.125079	0.103837	0.0753627	0.0706077	0.100158	0.0844686	0.107178	0.0919529	0.111948	0.0371654	0.0818101
AT7867	0.100847	0.106516	0.16148	0.0748987	0.111361	0.0975577	0.12588	0.102849	0.12287	1.70666	0.059189	0.113261	0.0849276	0.0889478	0.0827205	0.116096	0.0956571	0.0796586	0.0764951	0.108684	0.080292	0.0610359	0.0868558	0.0969832	0.0857062	0.133441	0.0882048	0.105172	0.0914557	0.125181	0.0921002	0.0750114	0.0812157	0.0773697	0.0744074	0.0841272	0.0880864	0.0722781	0.104667	0.0913015	0.0845062	0.0722781	0.0767469	0.0851083	0.0805634	0.0707142	0.0792806	0.0460983	0.085691
AVICIND	0.0724627	0.0581302	0.0413685	0.0553926	0.0605555	0.0516593	0.0812761	0.0431532	0.0618877	0.059189	2.26973	0.0632743	0.108558	0.0447833	0.0711082	0.0560724	0.0665216	0.0433098	0.0534601	0.0622029	0.0545099	0.0776052	0.0544698	0.0524346	0.0389329	0.070749	0.0398463	0.0604799	0.0589943	0.0680721	0.0503015	0.0634091	0.124761	0.060038	0.0583431	0.0831683	0.0773457	0.0560999	0.121298	0.0556711	0.065946	0.0560999	0.0858512	0.143198	0.0450965	0.0981143	0.148784	0.154539	0.0511934
AXITINIB	0.119619	0.104833	0.0881743	0.0786533	0.133827	0.0948778	0.0975009	0.103984	0.092554	0.113261	0.0632743	1.65944	0.0716453	0.0962645	0.089414	0.130392	0.0896635	0.0793172	0.102564	0.117652	0.113611	0.0616764	0.091661	0.118142	0.0800883	0.0911709	0.108337	0.115807	0.107164	0.0947844	0.0803777	0.0890535	0.094489	0.100315	0.087449	0.103344	0.106344	0.0860861	0.109612	0.109606	0.0939177	0.0860861	0.0890683	0.089937	0.128751	0.0839642	0.0914008	0.0571046	0.114465
AZACITIDINE	0.0655655	0.0730213	0.0566114	0.073246	0.0733472	0.0748525	0.0937389	0.0631644	0.0711558	0.0849276	0.108558	0.0716453	1.72582	0.0617495	0.100561	0.073465	0.0810238	0.0563026	0.0658256	0.0756817	0.069047	0.0578804	0.0776412	0.0665633	0.055698	0.101114	0.0605974	0.0773004	0.0766742	0.0889601	0.0700594	0.0794011	0.096548	0.08135	0.0835922	0.0955417	0.1027	0.0839315	0.109172	0.0772174	0.0860777	0.0839315	0.0864688	0.108933	0.0603299	0.0969851	0.112581	0.05869	0.0754951
AZD1480	0.0689627	0.0748531	0.0492028	0.106015	0.0842962	0.0988473	0.0621982	0.05549	0.0554232	0.0889478	0.0447833	0.0962645	0.0617495	1.75607	0.0726645	0.0728726	0.0699049	0.114935	0.213518	0.0723751	0.0653172	0.0433237	0.113164	0.0633192	0.11087	0.0769605	0.0996942	0.0933266	0.211281	0.0632631	0.0803985	0.0586486	0.0610577	0.0590804	0.0626384	0.0656904	0.067192	0.062031	0.0832928	0.0750607	0.061189	0.062031	0.0818808	0.0605532	0.0649936	0.0668942	0.0492204	0.039106	0.102009
AZD6482	0.0754691	0.104235	0.0650716	0.0780615	0.116182	0.113423	0.117363	0.0910102	0.0772383	0.0827205	0.0711082	0.089414	0.100561	0.0726645	1.80629	0.105636	0.108941	0.0916901	0.0813699	0.0751284	0.08223	0.050183	0.102119	0.131971	0.0742006	0.131456	0.0677134	0.197017	0.0986732	0.107759	0.0814352	0.0996828	0.0961515	0.0753071	0.0802976	0.091388	0.108698	0.0858508	0.0877319	0.0920233	0.108941	0.0858508	0.104845	0.0840515	0.0698383	0.119855	0.0886232	0.0484772	0.0832779
AZD7545	0.0655306	0.168191	0.0818604	0.0813007	0.134628	0.0936409	0.0931153	0.13998	0.0737396	0.116096	0.0560724	0.130392	0.073465	0.0728726	0.105636	1.86068	0.110045	0.0722066	0.0780433	0.0797181	0.121887	0.0499487	0.107995	0.144138	0.0784561	0.123716	0.0700231	0.105314	0.081371	0.0822541	0.0882614	0.118228	0.103307	0.0941188	0.0913884	0.0846347	0.0914109	0.0967213	0.0998805	0.0827553	0.116912	0.0967213	0.0834629	0.0888071	0.0845691	0.0833542	0.10325	0.0418516	0.0700607
AZD7762	0.0710462	0.120327	0.0853874	0.0646249	0.102089	0.0977455	0.0921859	0.0947286	0.0901212	0.0956571	0.0665216	0.0896635	0.0810238	0.0699049	0.108941	0.110045	1.70504	0.0641115	0.0775575	0.0865133	0.0914716	0.05356	0.0999918	0.0969258	0.0794255	0.0920135	0.0630307	0.0845909	0.085647	0.099877	0.0791037	0.131679	0.110517	0.0933046	0.0937145	0.104133	0.0941952	0.0837758	0.12113	0.0981661	0.140829	0.0837758	0.0907636	0.106894	0.0744877	0.089537	0.118097	0.0489406	0.0721844
AZD8055	0.0773999	0.0702538	0.0584294	0.109233	0.103289	0.146106	0.0785985	0.0700327	0.0574749	0.0796586	0.0433098	0.0793172	0.0563026	0.114935	0.0916901	0.0722066	0.0641115	2.14442	0.121976	0.0768991	0.0614787	0.0415916	0.128032	0.0710939	0.206411	0.0858721	0.112382	0.140718	0.0932195	0.0614686	0.0953781	0.0747558	0.0618136	0.0703463	0.068265	0.076885	0.0912228	0.0795305	0.0855693	0.104306	0.0793147	0.0795305	0.109103	0.0702646	0.0809331	0.0820504	0.0697926	0.0336806	0.0973302
BARASERTIB	0.0685037	0.0733646	0.0472271	0.226404	0.0999841	0.106165	0.0858441	0.0664345	0.0751514	0.0764951	0.0534601	0.102564	0.0658256	0.213518	0.0813699	0.0780433	0.0775575	0.121976	2.06337	0.0835755	0.0628765	0.0386892	0.130601	0.0733831	0.147419	0.0991888	0.0802412	0.146606	0.257693	0.0745008	0.138928	0.109491	0.0779934	0.139718	0.0926465	0.104341	0.106911	0.111058	0.12126	0.0823575	0.117844	0.111058	0.131644	0.0886519	0.0869266	0.108301	0.0786009	0.0354656	0.133696
BAXCHANNELBLOCKER	0.117601	0.0887135	0.0698051	0.0671434	0.107066	0.0763363	0.0822827	0.0764342	0.128101	0.108684	0.0622029	0.117652	0.0756817	0.0723751	0.0751284	0.0797181	0.0865133	0.0768991	0.0835755	1.6766	0.0815383	0.0649882	0.0904685	0.0815076	0.0959511	0.0866105	0.109285	0.0831346	0.0895886	0.0986034	0.119118	0.0722807	0.090762	0.0911368	0.0792466	0.0938619	0.0961713	0.0788349	0.0996062	0.0841913	0.0812634	0.0788349	0.0811171	0.0711153	0.17039	0.0710952	0.0911119	0.0439863	0.0890384
BELINOSTAT	0.0870208	0.134372	0.0769807	0.0681448	0.114575	0.0818846	0.0890425	0.0793965	0.0712758	0.080292	0.0545099	0.113611	0.069047	0.0653172	0.08223	0.121887	0.0914716	0.0614787	0.0628765	0.0815383	1.65385	0.0552627	0.0713072	0.164651	0.0617718	0.0839422	0.0777483	0.0913396	0.0694995	0.0960502	0.0656394	0.0731213	0.124728	0.105147	0.101784	0.0652711	0.0775923	0.0968599	0.0708532	0.0754438	0.0706125	0.0968599	0.067647	0.06542	0.0907115	0.072433	0.0725097	0.0511601	0.0663857
BETULINICACID	0.127689	0.05195	0.0960394	0.0422294	0.0574896	0.0517034	0.0603004	0.0592056	0.0537011	0.0610359	0.0776052	0.0616764	0.0578804	0.0433237	0.050183	0.0499487	0.05356	0.0415916	0.0386892	0.0649882	0.0552627	1.89969	0.0425119	0.0602224	0.0349975	0.0603246	0.042238	0.0510335	0.0465718	0.0553925	0.0429689	0.0409522	0.0587844	0.042326	0.0427404	0.0521507	0.0513858	0.0370015	0.0587153	0.048634	0.0421333	0.0370015	0.047348	0.0551719	0.0529689	0.0488139	0.0598429	0.152823	0.0478449
BI2536	0.064742	0.149911	0.0560537	0.134343	0.0901348	0.124854	0.0906179	0.090266	0.104953	0.0868558	0.0544698	0.091661	0.0776412	0.113164	0.102119	0.107995	0.0999918	0.128032	0.130601	0.0904685	0.0713072	0.0425119	2.01729	0.0741659	0.375848	0.109246	0.101099	0.104176	0.192289	0.101704	0.104192	0.114681	0.0804822	0.0868153	0.0854172	0.104026	0.126625	0.0843545	0.117405	0.0977117	0.133362	0.0843545	0.171173	0.112914	0.0924241	0.123054	0.138957	0.0341874	0.0894747
BIBR1532	0.100859	0.088673	0.126378	0.0946367	0.17842	0.0886995	0.108846	0.223274	0.0767981	0.0969832	0.0524346	0.118142	0.0665633	0.0633192	0.131971	0.144138	0.0969258	0.0710939	0.0733831	0.0815076	0.164651	0.0602224	0.0741659	1.88412	0.0629318	0.115962	0.0734934	0.124108	0.0737275	0.0897506	0.0807296	0.0884467	0.0797001	0.0630412	0.065332	0.0676565	0.0709399	0.0658117	0.0725588	0.0677968	0.0938653	0.0658117	0.0735475	0.0680983	0.085773	0.0763405	0.0713319	0.0533184	0.0617875
BIX01294	0.0688267	0.100619	0.0439731	0.129677	0.0909833	0.0955108	0.0725106	0.0765139	0.0836335	0.0857062	0.0389329	0.0800883	0.055698	0.11087	0.0742006	0.0784561	0.0794255	0.206411	0.147419	0.0959511	0.0617718	0.0349975	0.375848	0.0629318	2.28536	0.0778907	0.121292	0.0966601	0.126358	0.0701154	0.164756	0.0965231	0.0658605	0.0677276	0.0681511	0.0797931	0.0923801	0.0818242	0.10512	0.086949	0.0959613	0.0818242	0.134143	0.0812537	0.0880667	0.0823469	0.102666	0.0266468	0.08958
BLEBBISTATIN	0.0990353	0.114601	0.0888692	0.0782391	0.100424	0.107594	0.130821	0.142243	0.110354	0.133441	0.070749	0.0911709	0.101114	0.0769605	0.131456	0.123716	0.0920135	0.0858721	0.0991888	0.0866105	0.0839422	0.0603246	0.109246	0.115962	0.0778907	1.73865	0.0750949	0.132506	0.109585	0.107385	0.089828	0.099894	0.102716	0.0847679	0.0886549	0.108915	0.0979614	0.082037	0.109334	0.104904	0.115424	0.082037	0.133137	0.111116	0.0776598	0.133898	0.091421	0.049439	0.0853862
BMS345541	0.094656	0.0738915	0.0581214	0.0756279	0.0893261	0.0976918	0.0625617	0.0724989	0.0851301	0.0882048	0.0398463	0.108337	0.0605974	0.0996942	0.0677134	0.0700231	0.0630307	0.112382	0.0802412	0.109285	0.0777483	0.042238	0.101099	0.0734934	0.121292	0.0750949	1.84337	0.116651	0.143071	0.0798415	0.0887405	0.0551221	0.0620559	0.0696856	0.076742	0.0698983	0.0748108	0.0649214	0.0849334	0.0896004	0.0604023	0.0649214	0.0795374	0.0544942	0.114321	0.0631397	0.0571676	0.0340708	0.140009
BMS536924	0.089358	0.0965086	0.0680961	0.124184	0.144585	0.1188	0.12251	0.0904238	0.118827	0.105172	0.0604799	0.115807	0.0773004	0.0933266	0.197017	0.105314	0.0845909	0.140718	0.146606	0.0831346	0.0913396	0.0510335	0.104176	0.124108	0.0966601	0.132506	0.116651	1.81708	0.118395	0.130399	0.112728	0.0875357	0.0881449	0.0973152	0.0874165	0.0871414	0.108449	0.0932518	0.109562	0.0981518	0.0902772	0.0932518	0.117562	0.0749509	0.0809436	0.112968	0.0755964	0.0437182	0.108487
BMS754807	0.0750596	0.104693	0.0528453	0.121526	0.112258	0.110142	0.0828595	0.0699121	0.0982127	0.0914557	0.0589943	0.107164	0.0766742	0.211281	0.0986732	0.081371	0.085647	0.0932195	0.257693	0.0895886	0.0694995	0.0465718	0.192289	0.0737275	0.126358	0.109585	0.143071	0.118395	1.80684	0.102446	0.0967852	0.0678214	0.0831468	0.0853491	0.0754258	0.081313	0.0936608	0.082159	0.0933238	0.0832055	0.0752711	0.082159	0.144155	0.0709484	0.0732816	0.122358	0.0711587	0.0391372	0.145514
BORTEZOMIB	0.0852976	0.0910772	0.0843965	0.0634771	0.0879737	0.0775753	0.11941	0.0833429	0.253203	0.125181	0.0680721	0.0947844	0.0889601	0.0632631	0.107759	0.0822541	0.099877	0.0614686	0.0745008	0.0986034	0.0960502	0.0553925	0.101704	0.0897506	0.0701154	0.107385	0.0798415	0.130399	0.102446	1.74625	0.081428	0.0714946	0.0958416	0.0938164	0.0844701	0.087259	0.0955879	0.0694558	0.0954597	0.0859824	0.0795046	0.0694558	0.109342	0.0878464	0.087873	0.116609	0.0973315	0.0482983	0.0760031
BOSUTINIB	0.0843753	0.0925601	0.0515224	0.125379	0.122329	0.0969549	0.096461	0.0674045	0.105589	0.0921002	0.0503015	0.0803777	0.0700594	0.0803985	0.0814352	0.0882614	0.0791037	0.0953781	0.138928	0.119118	0.0656394	0.0429689	0.104192	0.0807296	0.164756	0.089828	0.0887405	0.112728	0.0967852	0.081428	2.01539	0.117455	0.085478	0.111271	0.106926	0.116583	0.105708	0.145919	0.0860899	0.0889656	0.10999	0.145919	0.103859	0.0918681	0.0919102	0.0905587	0.103652	0.0354305	0.125406
BRDK01737880	0.0596705	0.0914113	0.0573781	0.0779852	0.0899307	0.0853608	0.116619	0.10616	0.0638135	0.0750114	0.0634091	0.0890535	0.0794011	0.0586486	0.0996828	0.118228	0.131679	0.0747558	0.109491	0.0722807	0.0731213	0.0409522	0.114681	0.0884467	0.0965231	0.099894	0.0551221	0.0875357	0.0678214	0.0714946	0.117455	2.0862	0.0844632	0.150011	0.140632	0.212417	0.220815	0.23594	0.148731	0.100756	0.995435	0.23594	0.123264	0.254568	0.0978735	0.126396	0.351272	0.0344716	0.0836681
BRDK02492147	0.0766357	0.13564	0.0591035	0.0827542	0.0893795	0.0792531	0.0991382	0.066586	0.0841535	0.0812157	0.124761	0.094489	0.096548	0.0610577	0.0961515	0.103307	0.110517	0.0618136	0.0779934	0.090762	0.124728	0.0587844	0.0804822	0.0797001	0.0658605	0.102716	0.0620559	0.0881449	0.0831468	0.0958416	0.085478	0.0844632	1.7588	0.188746	0.157494	0.0926363	0.0974079	0.139013	0.132316	0.100724	0.0871926	0.139013	0.0895813	0.110409	0.0677514	0.0923985	0.141302	0.0701687	0.0821072
BRDK13999467	0.0707692	0.113776	0.0561199	0.08322	0.0908586	0.085664	0.0914685	0.0584682	0.106675	0.0773697	0.060038	0.100315	0.08135	0.0590804	0.0753071	0.0941188	0.0933046	0.0703463	0.139718	0.0911368	0.105147	0.042326	0.0868153	0.0630412	0.0677276	0.0847679	0.0696856	0.0973152	0.0853491	0.0938164	0.111271	0.150011	0.188746	2.00703	0.717157	0.170392	0.144464	0.866066	0.129159	0.136529	0.132519	0.866066	0.110946	0.111998	0.109759	0.108048	0.130338	0.0356946	0.1188
BRDK14844214	0.0687064	0.119871	0.0584693	0.0675609	0.0819614	0.0867144	0.0882744	0.0635575	0.082746	0.0744074	0.0583431	0.087449	0.0835922	0.0626384	0.0802976	0.0913884	0.0937145	0.068265	0.0926465	0.0792466	0.101784	0.0427404	0.0854172	0.065332	0.0681511	0.0886549	0.076742	0.0874165	0.0754258	0.0844701	0.106926	0.140632	0.157494	0.717157	1.9421	0.23258	0.151078	0.530421	0.132439	0.182422	0.139192	0.530421	0.107085	0.124598	0.0882613	0.110048	0.123032	0.0370703	0.117829
BRDK27224038	0.0943139	0.0925545	0.0635862	0.077776	0.0960004	0.0952459	0.106766	0.0845848	0.103856	0.0841272	0.0831683	0.103344	0.0955417	0.0656904	0.091388	0.0846347	0.104133	0.076885	0.104341	0.0938619	0.0652711	0.0521507	0.104026	0.0676565	0.0797931	0.108915	0.0698983	0.0871414	0.081313	0.087259	0.116583	0.212417	0.0926363	0.170392	0.23258	1.90737	0.167939	0.141311	0.165432	0.153639	0.24651	0.141311	0.172987	0.257397	0.0960192	0.169321	0.174778	0.0484732	0.104457
BRDK27986637	0.0693134	0.092265	0.0600445	0.0761406	0.0935802	0.0893638	0.110736	0.0879114	0.0852535	0.0880864	0.0773457	0.106344	0.1027	0.067192	0.108698	0.0914109	0.0941952	0.0912228	0.106911	0.0961713	0.0775923	0.0513858	0.126625	0.0709399	0.0923801	0.0979614	0.0748108	0.108449	0.0936608	0.0955879	0.105708	0.220815	0.0974079	0.144464	0.151078	0.167939	1.84502	0.127081	0.161117	0.109812	0.190702	0.127081	0.138582	0.215708	0.109966	0.152597	0.240211	0.0419021	0.11443
BRDK33514849	0.0650796	0.112999	0.0480717	0.0861841	0.096448	0.0826883	0.084537	0.0607802	0.0706077	0.0722781	0.0560999	0.0860861	0.0839315	0.062031	0.0858508	0.0967213	0.0837758	0.0795305	0.111058	0.0788349	0.0968599	0.0370015	0.0843545	0.0658117	0.0818242	0.082037	0.0649214	0.0932518	0.082159	0.0694558	0.145919	0.23594	0.139013	0.866066	0.530421	0.141311	0.127081	2.07881	0.0996809	0.122069	0.161102	2.07881	0.107001	0.0953249	0.0834191	0.104392	0.124476	0.0330386	0.100878
BRDK49290616	0.0827344	0.0886132	0.0702128	0.096761	0.0812533	0.102469	0.0979582	0.0932548	0.125079	0.104667	0.121298	0.109612	0.109172	0.0832928	0.0877319	0.0998805	0.12113	0.0855693	0.12126	0.0996062	0.0708532	0.0587153	0.117405	0.0725588	0.10512	0.109334	0.0849334	0.109562	0.0933238	0.0954597	0.0860899	0.148731	0.132316	0.129159	0.132439	0.165432	0.161117	0.0996809	1.95909	0.119755	0.155073	0.0996809	0.144173	0.281868	0.0955813	0.122695	0.406385	0.0490649	0.103983
BRDK50799972	0.10724	0.137718	0.0741973	0.0697828	0.0942613	0.127691	0.0958538	0.0944714	0.103837	0.0913015	0.0556711	0.109606	0.0772174	0.0750607	0.0920233	0.0827553	0.0981661	0.104306	0.0823575	0.0841913	0.0754438	0.048634	0.0977117	0.0677968	0.086949	0.104904	0.0896004	0.0981518	0.0832055	0.0859824	0.0889656	0.100756	0.100724	0.136529	0.182422	0.153639	0.109812	0.122069	0.119755	1.80654	0.109992	0.122069	0.105684	0.110601	0.111284	0.105421	0.0935218	0.0424217	0.116034
BRDK55116708	0.0637971	0.102216	0.0637742	0.099292	0.0967987	0.0881237	0.113433	0.134267	0.0753627	0.0845062	0.065946	0.0939177	0.0860777	0.061189	0.108941	0.116912	0.140829	0.0793147	0.117844	0.0812634	0.0706125	0.0421333	0.133362	0.0938653	0.0959613	0.115424	0.0604023	0.0902772	0.0752711	0.0795046	0.10999	0.995435	0.0871926	0.132519	0.139192	0.24651	0.190702	0.161102	0.155073	0.109992	2.02853	0.161102	0.136995	0.281415	0.0974068	0.140145	0.205724	0.0366053	0.0937843
BRDK63431240	0.0650796	0.112999	0.0480717	0.0861841	0.096448	0.0826883	0.084537	0.0607802	0.0706077	0.0722781	0.0560999	0.0860861	0.0839315	0.062031	0.0858508	0.0967213	0.0837758	0.0795305	0.111058	0.0788349	0.0968599	0.0370015	0.0843545	0.0658117	0.0818242	0.082037	0.0649214	0.0932518	0.082159	0.0694558	0.145919	0.23594	0.139013	0.866066	0.530421	0.141311	0.127081	2.07881	0.0996809	0.122069	0.161102	2.07881	0.107001	0.0953249	0.0834191	0.104392	0.124476	0.0330386	0.100878
BRDK71935468	0.0765647	0.11234	0.0585241	0.106159	0.0883848	0.120765	0.134841	0.0963099	0.100158	0.0767469	0.0858512	0.0890683	0.0864688	0.0818808	0.104845	0.0834629	0.0907636	0.109103	0.131644	0.0811171	0.067647	0.047348	0.171173	0.0735475	0.134143	0.133137	0.0795374	0.117562	0.144155	0.109342	0.103859	0.123264	0.0895813	0.110946	0.107085	0.172987	0.138582	0.107001	0.144173	0.105684	0.136995	0.107001	1.9766	0.170006	0.0745741	1.28994	0.128559	0.0424636	0.0932616
BRDK86535717	0.0684291	0.0802091	0.0639056	0.0810289	0.0719682	0.078761	0.130656	0.0901797	0.0844686	0.0851083	0.143198	0.089937	0.108933	0.0605532	0.0840515	0.0888071	0.106894	0.0702646	0.0886519	0.0711153	0.06542	0.0551719	0.112914	0.0680983	0.0812537	0.111116	0.0544942	0.0749509	0.0709484	0.0878464	0.0918681	0.254568	0.110409	0.111998	0.124598	0.257397	0.215708	0.0953249	0.281868	0.110601	0.281415	0.0953249	0.170006	2.06816	0.0848751	0.173044	0.38554	0.0517546	0.0863222
BRDK88742110	0.100197	0.0829211	0.0827982	0.0740071	0.0869053	0.10022	0.0826174	0.10069	0.107178	0.0805634	0.0450965	0.128751	0.0603299	0.0649936	0.0698383	0.0845691	0.0744877	0.0809331	0.0869266	0.17039	0.0907115	0.0529689	0.0924241	0.085773	0.0880667	0.0776598	0.114321	0.0809436	0.0732816	0.087873	0.0919102	0.0978735	0.0677514	0.109759	0.0882613	0.0960192	0.109966	0.0834191	0.0955813	0.111284	0.0974068	0.0834191	0.0745741	0.0848751	1.80692	0.0709777	0.0992931	0.0401996	0.110173
BRDK94991378	0.0730529	0.1101	0.0589338	0.0921129	0.0859352	0.103957	0.13071	0.0952326	0.0919529	0.0707142	0.0981143	0.0839642	0.0969851	0.0668942	0.119855	0.0833542	0.089537	0.0820504	0.108301	0.0710952	0.072433	0.0488139	0.123054	0.0763405	0.0823469	0.133898	0.0631397	0.112968	0.122358	0.116609	0.0905587	0.126396	0.0923985	0.108048	0.110048	0.169321	0.152597	0.104392	0.122695	0.105421	0.140145	0.104392	1.28994	0.173044	0.0709777	1.94459	0.123501	0.0462391	0.0892993
BRDK96431673	0.0670525	0.0918616	0.0605303	0.0691326	0.0708136	0.0736603	0.12893	0.0909139	0.111948	0.0792806	0.148784	0.0914008	0.112581	0.0492204	0.0886232	0.10325	0.118097	0.0697926	0.0786009	0.0911119	0.0725097	0.0598429	0.138957	0.0713319	0.102666	0.091421	0.0571676	0.0755964	0.0711587	0.0973315	0.103652	0.351272	0.141302	0.130338	0.123032	0.174778	0.240211	0.124476	0.406385	0.0935218	0.205724	0.124476	0.128559	0.38554	0.0992931	0.123501	2.08961	0.0472993	0.075393
BREFELDINA	0.0918307	0.0448071	0.0629791	0.0379135	0.0484832	0.042064	0.0541291	0.0414448	0.0371654	0.0460983	0.154539	0.0571046	0.05869	0.039106	0.0484772	0.0418516	0.0489406	0.0336806	0.0354656	0.0439863	0.0511601	0.152823	0.0341874	0.0533184	0.0266468	0.049439	0.0340708	0.0437182	0.0391372	0.0482983	0.0354305	0.0344716	0.0701687	0.0356946	0.0370703	0.0484732	0.0419021	0.0330386	0.0490649	0.0424217	0.0366053	0.0330386	0.0424636	0.0517546	0.0401996	0.0462391	0.0472993	2.16359	0.0433721
BRIVANIB	0.0938988	0.0741531	0.0607803	0.117875	0.0895557	0.116848	0.0914304	0.0589645	0.0818101	0.085691	0.0511934	0.114465	0.0754951	0.102009	0.0832779	0.0700607	0.0721844	0.0973302	0.133696	0.0890384	0.0663857	0.0478449	0.0894747	0.0617875	0.08958	0.0853862	0.140009	0.108487	0.145514	0.0760031	0.125406	0.0836681	0.0821072	0.1188	0.117829	0.104457	0.11443	0.100878	0.103983	0.116034	0.0937843	0.100878	0.0932616	0.0863222	0.110173	0.0892993	0.075393	0.0433721	1.74935
CANERTINIB	0.0574415	0.0702181	0.0414862	1.26626	0.113305	0.107797	0.0996768	0.0613563	0.0597919	0.0771913	0.0498262	0.0710046	0.0657767	0.0939022	0.0824797	0.0836347	0.0627215	0.121281	0.339862	0.0785592	0.0610303	0.0366391	0.129541	0.0821958	0.130119	0.0824014	0.071331	0.135491	0.116205	0.065	0.156661	0.100653	0.0836331	0.106283	0.0801236	0.0917415	0.0837041	0.106782	0.106432	0.0663321	0.131534	0.106782	0.100543	0.0742951	0.0698397	0.0883545	0.0764896	0.0308923	0.107781
CAY10594	0.070599	0.163072	0.0712769	0.0689122	0.0952864	0.087265	0.095215	0.135132	0.11372	0.103327	0.0649962	0.095407	0.0894882	0.0686188	0.115159	0.145592	0.139901	0.0598622	0.0808081	0.10804	0.0854324	0.0534408	0.190191	0.109628	0.147493	0.125327	0.0657226	0.0835806	0.100702	0.108794	0.0993967	0.165595	0.096008	0.0751239	0.0754558	0.0943367	0.114314	0.0940765	0.125467	0.0881597	0.178618	0.0940765	0.125505	0.126117	0.0852691	0.120778	0.167539	0.0409805	0.0634422
CAY10618	0.104075	0.123568	0.0789111	0.071528	0.13645	0.096937	0.0746765	0.090992	0.119669	0.138419	0.0615009	0.118935	0.0769833	0.0793147	0.106991	0.101178	0.104451	0.102474	0.0893566	0.111247	0.0834885	0.0598393	0.106813	0.103841	0.090028	0.118976	0.0942119	0.112638	0.130193	0.100238	0.100433	0.0791391	0.0844088	0.0894819	0.0898609	0.0946016	0.173099	0.0915521	0.0994792	0.120672	0.0893515	0.0915521	0.0941529	0.0765582	0.0940513	0.0925606	0.084877	0.0442104	0.0893908
CCT036477	0.109774	0.117051	0.0653654	0.0752289	0.12534	0.123941	0.0699136	0.121234	0.102256	0.14265	0.0384076	0.11515	0.0605527	0.0953237	0.0782126	0.120435	0.071573	0.110879	0.0778146	0.0980152	0.0778895	0.0424336	0.0929936	0.097805	0.11147	0.0948384	0.16749	0.118688	0.101231	0.0753031	0.108067	0.0748823	0.065266	0.0695364	0.0764782	0.0947538	0.071899	0.0732565	0.0875288	0.129734	0.0884263	0.0732565	0.0812434	0.057541	0.111794	0.0664221	0.0622743	0.0328178	0.0996963
CD1530	0.137157	0.0725155	1.08714	0.0506828	0.078554	0.0858287	0.106683	0.207225	0.0756822	0.141613	0.0421568	0.0893366	0.0574547	0.0459028	0.0637668	0.0692745	0.0786146	0.0648537	0.0518587	0.076567	0.0715975	0.0979731	0.062498	0.123439	0.0495511	0.0916838	0.0616665	0.0672235	0.0522906	0.0774411	0.0594773	0.0694532	0.056116	0.0628834	0.0649742	0.0711191	0.0675634	0.0525832	0.0638001	0.07777	0.0769578	0.0525832	0.0645388	0.0727402	0.0982965	0.0646717	0.0697134	0.0536368	0.0694122
CD437	0.139548	0.0711998	0.616834	0.0510805	0.0765882	0.0860066	0.116233	0.235385	0.0752071	0.129822	0.0438795	0.086308	0.0563466	0.0476902	0.0732279	0.0715828	0.0767273	0.0781798	0.0536403	0.0761195	0.0715631	0.100901	0.0628168	0.125829	0.0514333	0.106134	0.0617755	0.0726929	0.0530076	0.0772692	0.0579613	0.0692772	0.0580473	0.0599773	0.062181	0.0713314	0.0696275	0.0518727	0.0701813	0.0816643	0.0766259	0.0518727	0.0719234	0.0749303	0.100905	0.0718515	0.0719104	0.0560024	0.0697862
CEDIRANIB	0.0886714	0.0663964	0.0606671	0.135093	0.0803977	0.103653	0.0993288	0.0616818	0.0893571	0.0913592	0.0507191	0.105884	0.0699187	0.0823602	0.0686588	0.0664745	0.0747568	0.110692	0.176516	0.107749	0.0607615	0.0432537	0.0980592	0.0622128	0.145398	0.090137	0.123282	0.111167	0.0997385	0.0775679	0.183132	0.096891	0.0821832	0.139117	0.11342	0.102256	0.114523	0.108889	0.127633	0.0989751	0.0968138	0.108889	0.0874755	0.0877681	0.110352	0.0760759	0.0903078	0.0370023	0.387535
CERULENIN	0.102023	0.0496325	0.0612107	0.0502161	0.0547293	0.0467223	0.0678579	0.0561216	0.0585579	0.0660792	0.127502	0.0640893	0.0772315	0.0490736	0.0606596	0.0560003	0.0620384	0.0455364	0.0490156	0.0577753	0.0542889	0.167701	0.0460333	0.0584398	0.0340095	0.0722294	0.0392575	0.0578823	0.0510237	0.0634219	0.046713	0.0485702	0.0906163	0.047151	0.0483685	0.0669393	0.0620172	0.0424228	0.0916214	0.0508373	0.0524991	0.0424228	0.0580759	0.082791	0.0493701	0.0594998	0.0897838	0.164884	0.0512086
CHIR99021	0.0877603	0.114393	0.0655107	0.0841117	0.116118	0.219838	0.069941	0.0767289	0.0735413	0.108727	0.042308	0.0879198	0.0612832	0.0935615	0.0799168	0.0847974	0.0674334	0.155984	0.075027	0.0891128	0.0716056	0.0427651	0.101862	0.0794351	0.103565	0.0897663	0.193292	0.117502	0.117949	0.0705826	0.111791	0.0569211	0.0674267	0.0600456	0.0658384	0.0680668	0.067689	0.0660531	0.0831922	0.107232	0.0643993	0.0660531	0.101598	0.0564775	0.0770024	0.0745156	0.0530114	0.0341868	0.10145
CHLORAMBUCIL	0.11011	0.0955694	0.163108	0.0730531	0.0974752	0.083419	0.0955919	0.274662	0.0886236	0.156179	0.0586165	0.0828972	0.0746731	0.0684459	0.0849414	0.145634	0.0851405	0.0736275	0.0756973	0.0895376	0.0962085	0.085181	0.0805872	0.169975	0.0723154	0.153418	0.0775478	0.110683	0.0795391	0.102338	0.0839554	0.0841323	0.0811772	0.0674528	0.069625	0.0758196	0.0841278	0.0690879	0.096698	0.0699273	0.0895917	0.0690879	0.0850804	0.0745662	0.0851538	0.084646	0.0849066	0.0537229	0.0674448
CI976	0.0718012	0.0870862	0.0764457	0.11591	0.0968597	0.0764126	0.0948505	0.120421	0.093177	0.101863	0.0627178	0.0730324	0.0891505	0.0613699	0.08551	0.113462	0.0897138	0.0757219	0.0909641	0.0788192	0.0800002	0.0725893	0.114915	0.122624	0.109707	0.109306	0.0618363	0.0852881	0.0805453	0.0886567	0.100409	0.112107	0.0815011	0.0752796	0.0773632	0.0840969	0.0885923	0.0848399	0.0919309	0.0769878	0.131261	0.0848399	0.0841364	0.0987396	0.0868629	0.0871321	0.114848	0.0492369	0.0686489
CICLOPIROX	0.0914201	0.0770398	0.070459	0.0717769	0.0842549	0.0725977	0.0963177	0.0645421	0.0874634	0.0963	0.104564	0.0799366	0.0818413	0.0625896	0.120728	0.0732425	0.09631	0.0550334	0.0614271	0.0780103	0.107019	0.0822591	0.0713612	0.0928687	0.055926	0.084424	0.0633391	0.109825	0.0736702	0.115761	0.0627825	0.0737005	0.106476	0.0685709	0.0724724	0.0795711	0.0794849	0.0647405	0.0924303	0.073929	0.0745423	0.0647405	0.0682117	0.0874963	0.0744853	0.0731198	0.0920768	0.0942441	0.0661119
CIMETIDINE	0.0903547	0.0901666	0.0725954	0.0736905	0.0786856	0.100801	0.0750777	0.0741614	0.0770283	0.0877381	0.0577537	0.0985131	0.0923531	0.0969745	0.084007	0.0903716	0.0804876	0.0743102	0.0726699	0.0814808	0.0911253	0.0642949	0.0771541	0.0760204	0.0649197	0.0959651	0.116456	0.0970823	0.0856273	0.0813842	0.0732972	0.0647581	0.0782932	0.0726898	0.0828671	0.0759402	0.0810939	0.06848	0.0931384	0.0857225	0.0689908	0.06848	0.0696528	0.0654052	0.0813538	0.0703335	0.0647813	0.0554321	0.0970799
[truncated: 177 more rows]
[truncated: 190 more columns]

## Sheet: E) DNF(NCI60)
	6AMINOCHRYSENE	ABIRATERONE	ACETYLCYSTEINE	ACTINOMYCIND	AFATINIB	AG957	ALLANTOIN	ALLOPURINOL	ALVESPIMYCIN	ALVOCIDIB	AMONAFIDE	AMPHOTERICINB	AMSACRINE	ARTEMETHER	ARTESUNATE	ASCORBICACID	AXITINIB	AZACITIDINE	BACCATINIII	BELINOSTAT	BENZO(A)PYRENE	BERBAMINE	BISACODYL	BISBENZIMIDE	BORTEZOMIB	BOSUTINIB	BRDK00910650	CADMIUMCHLORIDE	CAFFEICACID	CAFFEICACIDPHENETHYLESTER	CALYCANTHINE	CAMPTOTHECIN	CARMOFUR	CELASTROL	CELECOXIB	CHELIDONINE	CHLORAMBUCIL	CHROMOMYCINA3	CINCHONINE	CISPLATIN	CLADRIBINE	CLIOQUINOL	CLOFARABINE	CLOFAZIMINE	CLOTRIMAZOLE	COLCHICINE	CRIZOTINIB	CURCUMIN	CYCLOHEXIMIDE
[truncated: 238 more rows]
[truncated: 189 more columns]

[truncated: 3 more sheets: F) Perturbation(NCI60), G) Sensitivity(NCI60), H) Structure(NCI60)]
