# Supplementary material for: Integrative Cancer Pharmacogenomics to Infer Large-Scale Drug Taxonomy
Source: Oxford University Press journal article supplement (doi:10.1158/0008-5472.can-17-0096), 2017-03-17
Supplement: 00085472can170096-sup-177323_1_supp_3899877_xmkvbv.xlsx [file 00085472can170096-sup-177323_1_supp_3899877_xmkvbv.xlsx]

## Sheet: A. AUROC and Pvalues
CTRPv2 (targets)				NCI60 (targets)
Taxonomy	AUC	pval (DNF vs. Single)		Taxonomy	AUC	pval (DNF vs. Single)
DNF	0.887	---		DNF	0.876	---
structure	0.708	1.05268e-42		structure	0.801	9.88919e-06
perturbation	0.635	1.31222e-58		perturbation	0.615	6.81373e-25
sensitivity	0.827	3.76326e-06		sensitivity	0.801	0.00018925
Iorio	0.602	1.2146e-65		Iorio	0.593	4.21579e-27
Iskar	0.649	9.2045e-39		Iskar	0.694	3.92484e-13
Drug E-Rank	0.614	2.02087e-62		Drug E-Rank	0.749	5.73793e-08
CTRPv2 (ATCs)				NCI60 (ATCs)
Taxonomy	AUC	pval (DNF vs. Single)		Taxonomy	AUC	pval (DNF vs. Single)
DNF	0.801	---		DNF	0.853	---
structure	0.715	3.08139e-07		structure	0.772	7.2559e-07
perturbation	0.577	8.09283e-27		perturbation	0.615	3.06967e-30
sensitivity	0.6	2.22533e-21		sensitivity	0.685	4.2466e-23
Iorio	0.632	5.36822e-14		Iorio	0.619	2.32382e-25
Iskar	0.522	2.43085e-30		Iskar	0.541	2.98191e-40
SuperPred	0.677	2.40135e-08		SuperPred	0.725	1.13416e-08

## Sheet: B. AUPRC
CTRPv2 (targets)				NCI60 (targets)
Taxonomy	AUC			Taxonomy	AUC
DNF	0.413			DNF	0.552
structure	0.171			structure	0.426
perturbation	0.093			perturbation	0.152
sensitivity	0.406			sensitivity	0.434
Iorio	0.074			Iorio	0.134
Iskar	0.149			Iskar	0.247
Drug E-Rank	0.077			Drug E-Rank	0.303
random	0.036			random	0.048
CTRPv2 (ATCs)				NCI60 (ATCs)
Taxonomy	AUC			Taxonomy	AUC
DNF	0.558			DNF	0.492
structure	0.467			structure	0.404
perturbation	0.316			perturbation	0.242
sensitivity	0.405			sensitivity	0.278
Iorio	0.401			Iorio	0.253
Iskar	0.256			Iskar	0.158
SuperPred	0.37			SuperPred	0.334
random	0.212			random	0.095
