# Supplementary material for: Integrative Cancer Pharmacogenomics to Infer Large-Scale Drug Taxonomy
Source: Oxford University Press journal article supplement (doi:10.1158/0008-5472.can-17-0096), 2017-03-17
Supplement: 00085472can170096-sup-177323_1_supp_3899878_2mkvbv.xlsx [file 00085472can170096-sup-177323_1_supp_3899878_2mkvbv.xlsx]

## Sheet: A
Exemplar	Target/mechanism	Community	number.of.drugs	Drugs
ABIRATERONE	?	1	5	ABIRATERONE	BRIVANIB	ERISMODEGIB	EX527	TAMOXIFEN
AFATINIB	Receptor tyrosine kinase EGFR	2	9	AFATINIB	CANERTINIB	CYANOQUINOLINE11	ERLOTINIB	GEFITINIB	IBRUTINIB	LAPATINIB	NERATINIB	WZ4002
ALVOCIDIB	CDKs	3	9	ALVOCIDIB	BMS345541	DOXORUBICIN	HLI373	MYRICETIN	NARCICLASINE	PHA793887	STAUROSPORINE	TRIPTOLIDE
AZD6482	PI3Ks	4	3	AZD6482	GSK1059615	TGX221
BIX01294	EHMT2	5	4	BIX01294	BOSUTINIB	NSC23766	UNC0321
BMS754807	IGF1R	6	4	AZD1480	BMS536924	BMS754807	LINSITINIB
BORTEZOMIB	Proteasome	7	3	BORTEZOMIB	MG132	MLN2238
BRDK01737880	Aurora kinase	8	4	ALISERTIB	BARASERTIB	BRDK01737880	BRDK55116708
BRDK27224038	?	9	5	BRDK13999467	BRDK27224038	BRDK27986637	BRDK50799972	VELIPARIB
BRDK33514849	?	10	4	BRDK14844214	BRDK33514849	BRDK63431240	SILDENAFIL
BRDK71935468	?	11	2	BRDK71935468	BRDK94991378
BRDK88742110	?	12	2	BRDK88742110	ISONICOTINOHYDROXAMICACID
BRDK96431673	?	13	4	BRDK02492147	BRDK49290616	BRDK86535717	BRDK96431673
CD1530	RAR family	14	5	AC55649	AM580	CD1530	CD437	SALERMIDE
COL3	?	15	7	COL3	FULVESTRANT	GOSSYPOL	LE135	PHLORETIN	TIGECYCLINE	TOSEDOSTAT
CRIZOTINIB	ALK	16	4	AT7867	CRIZOTINIB	NVPTAE684	RUXOLITINIB
CYCLOPHOSPHAMIDE	DNA	17	6	CYCLOPHOSPHAMIDE	DEXAMETHASONE	GANT61	IFOSFAMIDE	NECROSTATIN1	PROCARBAZINE
DABRAFENIB	BRAF mutant	18	3	DABRAFENIB	GDC0879	PLX4720
DACARBAZINE	?	19	4	CIMETIDINE	DACARBAZINE	FLUOROURACIL	TEMOZOLOMIDE
DECITABINE	DNMT1	20	4	AZACITIDINE	DECITABINE	QS11	ZEBULARINE
DOCETAXEL	microtubule dynamics	21	5	DOCETAXEL	PACLITAXEL	PARBENDAZOLE	SB225002	VINCRISTINE
GMX1778	NAMPT	22	3	CAY10618	GMX1778	TIPIFARNIBP2
GW843682X	PLK1	23	4	GSK461364	GW843682X	MK1775	PRL3INHIBITORI
IMATINIB	ABL1	24	5	AXITINIB	CHIR99021	IMATINIB	MASITINIB	NILOTINIB
ISOLIQUIRITIGENIN	?	25	4	ISOLIQUIRITIGENIN	ITRACONAZOLE	PIFITHRINALPHA	RITA
ISOX	HDACs	26	3	APICIDIN	BELINOSTAT	ISOX
KO143	?	27	5	GW405833	KO143	PURMORPHAMINE	RG108	SID26681509
KU0063794	AKT/PI3K/mTOR axis	28	8	AZD8055	GDC0941	KU0063794	MK2206	NVPBEZ235	OSI027	PI103	ZSTK474
KU55933	ATM	29	3	AZD7762	KU55933	KU60019
LOVASTATIN	HMGCR	30	4	FLUVASTATIN	LOVASTATIN	PARTHENOLIDE	SIMVASTATIN
MANUMYCINA	?	31	3	CCT036477	MANUMYCINA	TANESPIMYCIN
MYRIOCIN	?	32	4	BETULINICACID	ETOMOXIR	MYRIOCIN	TRETINOIN
NAVITOCLAX	BCL2	33	3	ABT737	NAVITOCLAX	NUTLIN3
NINTEDANIB	?	34	3	GSK3INHIBITORIX	NINTEDANIB	SU11274
OLIGOMYCINA	?	35	7	AZD7545	BREFELDINA	HYPERFORIN	OLIGOMYCINA	OUABAIN	PF750	VALDECOXIB
PIPERLONGUMINE	Reactive oxygen species inducer	36	7	CERULENIN	CUCURBITACINI	CURCUMIN	NSC632839	PIFITHRINMU	PIPERLONGUMINE	PX12
PRIMA1MET	mutant p53	37	6	DARINAPARSIN	FUMONISINB1	PRIMA1	PRIMA1MET	SRT1720	VER155008
SARACATINIB	multikinases	38	3	DASATINIB	SARACATINIB	TANDUTINIB
SB431542	TGFBR1	39	2	SB431542	SB525334
SCH79797	?	40	4	IMPORTAZOLE	METHOTREXATE	SCH79797	YM155
SELUMETINIB	MEK	41	2	SELUMETINIB	TRAMETINIB
SITAGLIPTIN	?	42	6	BLEBBISTATIN	FGIN127	SGX523	SITAGLIPTIN	SJ172550	TG100115
SN38	Topoisomerase/DNA repair,synthesis	43	8	CHLORAMBUCIL	CLOFARABINE	ETOPOSIDE	GEMCITABINE	OBATOCLAX	SN38	TENIPOSIDE	TOPOTECAN
SORAFENIB	?	44	5	BIBR1532	CI976	ERASTIN	OSI930	SORAFENIB
TACEDINALINE	HDACs	45	5	ENTINOSTAT	MERCK60	TACEDINALINE	TUBASTATINA	VORINOSTAT
TEMSIROLIMUS	mTOR	46	5	AVICIND	CYTOCHALASINB	SIROLIMUS	TACROLIMUS	TEMSIROLIMUS
TG101348	?	47	3	BI2536	KU0060648	TG101348
THALIDOMIDE	?	48	3	AGK2	OLAPARIB	THALIDOMIDE
TIVANTINIB	?	49	3	LY2183240	TIVANTINIB	YK4279
TIVOZANIB	VEGFRs	50	8	CEDIRANIB	FORETINIB	KI8751	LINIFANIB	MGCD265	PAZOPANIB	QUIZARTINIB	TIVOZANIB
TPCA1	?	51	3	PYRAZOLANTHRONE	SUNITINIB	TPCA1
TRIFLUOPERAZINE	dopamine receptor antagonist	52	6	BAXCHANNELBLOCKER	CAY10594	PF543	PROCHLORPERAZINE	SERDEMETAN	TRIFLUOPERAZINE
TW37	?	53	5	CICLOPIROX	MST312	NICLOSAMIDE	PAC1	TW37

## Sheet: B
Positive control target in CTRPv2	Drugs (communities with at least 2 drugs with a known target in CTRPv2)
NA	ABIRATERONE	BRIVANIB	ERISMODEGIB	EX527	TAMOXIFEN
Receptor tyrosine kinase EGFR	AFATINIB	CANERTINIB	CYANOQUINOLINE11	ERLOTINIB	GEFITINIB	IBRUTINIB	LAPATINIB	NERATINIB	WZ4002
CDKs	ALVOCIDIB	BMS345541	DOXORUBICIN	HLI373	MYRICETIN	NARCICLASINE	PHA793887	STAUROSPORINE	TRIPTOLIDE
PI3Ks	AZD6482	GSK1059615	TGX221
EHMT2	BIX01294	BOSUTINIB	NSC23766	UNC0321
IGF1R	AZD1480	BMS536924	BMS754807	LINSITINIB
Proteasome	BORTEZOMIB	MG132	MLN2238
Aurora kinase	ALISERTIB	BARASERTIB	BRDK01737880	BRDK55116708
RAR family	AC55649	AM580	CD1530	CD437	SALERMIDE
NA	COL3	FULVESTRANT	GOSSYPOL	LE135	PHLORETIN	TIGECYCLINE	TOSEDOSTAT
ALK	AT7867	CRIZOTINIB	NVPTAE684	RUXOLITINIB
BRAF mutant	DABRAFENIB	GDC0879	PLX4720
DNMT1	AZACITIDINE	DECITABINE	QS11	ZEBULARINE
NAMPT	CAY10618	GMX1778	TIPIFARNIBP2
PLK1	GSK461364	GW843682X	MK1775	PRL3INHIBITORI
ABL1	AXITINIB	CHIR99021	IMATINIB	MASITINIB	NILOTINIB
NA	BRDK88742110	ISONICOTINOHYDROXAMICACID
HDACs	APICIDIN	BELINOSTAT	ISOX
AKT/PI3K/mTOR axis	AZD8055	GDC0941	KU0063794	MK2206	NVPBEZ235	OSI027	PI103	ZSTK474
ATM	AZD7762	KU55933	KU60019
HMGCR	FLUVASTATIN	LOVASTATIN	PARTHENOLIDE	SIMVASTATIN
BCL2	ABT737	NAVITOCLAX	NUTLIN3
NA	GSK3INHIBITORIX	NINTEDANIB	SU11274
mutant p53	DARINAPARSIN	FUMONISINB1	PRIMA1	PRIMA1MET	SRT1720	VER155008
multikinases	DASATINIB	SARACATINIB	TANDUTINIB
TGFBR1	SB431542	SB525334
MEK	SELUMETINIB	TRAMETINIB
NA	BLEBBISTATIN	FGIN127	SGX523	SITAGLIPTIN	SJ172550	TG100115
Topoisomerase/DNA repair,synthesis	CHLORAMBUCIL	CLOFARABINE	ETOPOSIDE	GEMCITABINE	OBATOCLAX	SN38	TENIPOSIDE	TOPOTECAN
NA	BIBR1532	CI976	ERASTIN	OSI930	SORAFENIB
HDACs	ENTINOSTAT	MERCK60	TACEDINALINE	TUBASTATINA	VORINOSTAT
mTOR	AVICIND	CYTOCHALASINB	SIROLIMUS	TACROLIMUS	TEMSIROLIMUS
NA	BI2536	KU0060648	TG101348
NA	AGK2	OLAPARIB	THALIDOMIDE
NA	LY2183240	TIVANTINIB	YK4279
VEGFRs	CEDIRANIB	FORETINIB	KI8751	LINIFANIB	MGCD265	PAZOPANIB	QUIZARTINIB	TIVOZANIB
NA	PYRAZOLANTHRONE	SUNITINIB	TPCA1
dopamine receptor antagonist	BAXCHANNELBLOCKER	CAY10594	PF543	PROCHLORPERAZINE	SERDEMETAN	TRIFLUOPERAZINE
NA	CICLOPIROX	MST312	NICLOSAMIDE	PAC1	TW37

## Sheet: C
Summary of Common Functional Drug Classes Identified Using DNF (CTRPv2 and NCI60)
Functional Drug Class
Statins (HMG-CoA reductase inhibitors)
mTOR/PI3Ks axis inhibitors
EGFR (epidermal growth factor receptor) inhibitors
MEK/BRAF (Mitogen-activated protein kinase kinase) inhibitors
BCR-ABL (fusion protein in chronic myelogenous leukemia) inhibitors
Tubulin polymerisation/depolymerisation regulators
DNA topoisomerase inhibitors
Histone deacetylase inhibitors
DNA synthesis inhibitors
Intercalating and DNA damaging agents

## Sheet: D
Summary of communities generated from CTRPv2/L1000 integrative layers
(positive controls, at least 2 drugs sharing same mechanism)
Exemplar Drug*	Traget/mechanism (positive control)	Community	Number of drugs	Source of drug-target/ATC
* Communities are summerized by an exemplar drug, representative of each community.
AFATINIB	Receptor tyrosine kinase EGFR	2	9	CTRPv2
ALVOCIDIB	CDKs	3	9	CTRPv2
AZD6482	PI3Ks	4	3	CTRPv2
BIX01294	EHMT2	5	4	CTRPv2
BMS754807	IGF1R	6	4	CTRPv2
BORTEZOMIB	Proteasome	7	3	CTRPv2
BRDK01737880	Aurora kinase	8	4	CTRPv2
CD1530	RAR family	14	5	CTRPv2
CRIZOTINIB	ALK	16	4	CTRPv2
DABRAFENIB	BRAF mutant	18	3	CTRPv2
DECITABINE	DNMT1	20	4	CTRPv2
DOCETAXEL	microtubule dynamics	21	5	CTRPv2
GMX1778	NAMPT	22	3	CTRPv2
GW843682X	PLK1	23	4	CTRPv2
IMATINIB	ABL1	24	5	CTRPv2
ISOX	HDACs	26	3	CTRPv2
KU0063794	AKT/PI3K/mTOR axis	28	8	CTRPv2
KU55933	ATM	29	3	CTRPv2
LOVASTATIN	HMGCR	30	4	CTRPv2
NAVITOCLAX	BCL2	33	3	CTRPv2
PRIMA1MET	mutant p53	37	6	CTRPv2
SARACATINIB	multikinases	38	3	CTRPv2
SB431542	TGFBR1	39	2	CTRPv2
SELUMETINIB	MEK	41	2	CTRPv2
SN38	Topoisomerase/DNA repair,synthesis	43	8	CTRPv2
TACEDINALINE	HDACs	45	5	CTRPv2
TEMSIROLIMUS	mTOR	46	5	CTRPv2
TIVOZANIB	VEGFRs	50	8	CTRPv2
TRIFLUOPERAZINE	dopamine receptor antagonist	52	6	CTRPv2

## Sheet: E
Exemplar	Target/mechanism	population	number.of.drugs	Drugs
6AMINOCHRYSENE	?	1	4	6AMINOCHRYSENE	BENZO(A)PYRENE	CLIOQUINOL	ELLIPTICINE
AG957	Oxidative stress (ROS inducers)	2	6	AG957	CADMIUMCHLORIDE	ELESCLOMOL	FENRETINIDE	RADICICOL	STAT3INHIBITORVI
ALVESPIMYCIN	HSP90	3	2	ALVESPIMYCIN	TANESPIMYCIN
ARTEMETHER	antimalarial	4	3	ARTEMETHER	ARTESUNATE	YOHIMBINE
BRDK00910650	Oxidative stress (ROS inducers)	5	5	BRDK00910650	CURCUMIN	ETACRYNICACID	PHENETHYLISOTHIOCYANATE	RALOXIFENE
CAFFEICACID	?	6	3	CAFFEICACID	CAFFEICACIDPHENETHYLESTER	LAVENDUSTINA
CARMOFUR	TYMS	7	3	CARMOFUR	FLUOROURACIL	TEGAFUR
CINCHONINE	?	8	4	CINCHONINE	GEDUNIN	SULFAQUINOXALINE	SULOCTIDIL
CLADRIBINE	DNA synthesis	9	3	CLADRIBINE	CLOFARABINE	FLUDARABINE
CYCLOPHOSPHAMIDE	DNA (alkylating)	10	4	BERBAMINE	CYCLOPHOSPHAMIDE	FLUCONAZOLE	IFOSFAMIDE
DACARBAZINE	?	11	4	ALLOPURINOL	DACARBAZINE	MITOTANE	WORTMANNIN
DAUNORUBICIN	DNA intercalation/repair	12	10	ACTINOMYCIND	ALVOCIDIB	CHROMOMYCINA3	DAUNORUBICIN	DOXORUBICIN	EPIRUBICIN	IDARUBICIN	KENPAULLONE	MITOXANTRONE	ROTENONE
DECITABINE	DNA methylation	13	5	AMONAFIDE	AZACITIDINE	DECITABINE	PHENYLBUTYRATE	TUNICAMYCIN
DIGOXIN	ATPase, Na+/K+	14	7	BISACODYL	DIGOXIN	GITOXIGENIN	LANATOSIDEC	OUABAIN	PROSTRATIN	SOLANINE
DIHYDROERGOCRISTINE	?	15	4	CYCLOPIAZONICACID	DIHYDROERGOCRISTINE	LASALOCID	NELFINAVIR
EMETINE	protein synthesis inhibitors	16	4	ACETYLCYSTEINE	CYCLOHEXIMIDE	EMETINE	HOMOHARRINGTONINE
ETHINYLESTRADIOL	?	17	3	ETHINYLESTRADIOL	FULVESTRANT	NOSCAPINE
FLUOROMETHOLONE	Glucocorticoid receptor	18	10	DEXAMETHASONE	FLUMETHASONE	FLUOCINOLONE	FLUOROMETHOLONE	FLUPHENAZINE	IDEBENONE	ISOFLUPREDONE	METHYLPREDNISOLONE	NICOTINAMIDE	TRIAMCINOLONE
FORSKOLIN	?	19	3	FORSKOLIN	PYRAZOLANTHRONE	SUNITINIB
GEFITINIB	Receptor kinase/EGFR	20	11	AFATINIB	BOSUTINIB	CRIZOTINIB	DASATINIB	ERLOTINIB	FOSTAMATINIB	GEFITINIB	IBRUTINIB	LAPATINIB	PAZOPANIB	TYRPHOSTINAG1478
GEMCITABINE	TYMS	21	5	CYTARABINE	FLOXURIDINE	GEMCITABINE	IDOXURIDINE	RALTITREXED
HONOKIOL	?	22	4	CLOTRIMAZOLE	HONOKIOL	PROBUCOL	RYANODINE
HYPERICIN	?	23	4	EMODIN	GOSSYPOL	HYPERICIN	PIPAMPERONE
ISOTRETINOIN	?	24	4	IMIQUIMOD	ISOTRETINOIN	MIFEPRISTONE	PROGESTERONE
ITRACONAZOLE	Lanosterol 14-alpha demethylase	25	3	ABIRATERONE	ITRACONAZOLE	TERCONAZOLE
KINETINRIBOSIDE	?	26	4	KINETINRIBOSIDE	PUROMYCIN	ROSCOVITINE	TRICIRIBINE
LEFLUNOMIDE	?	27	3	CELECOXIB	LEFLUNOMIDE	NICLOSAMIDE
LORATADINE	?	28	5	AXITINIB	CLOFAZIMINE	LORATADINE	RITONAVIR	VALPROICACID
MALONOBEN	?	29	4	HEXACHLOROPHENE	MALONOBEN	TAMOXIFEN	TYRPHOSTINA9
MEBENDAZOLE	tubulin	30	9	CHELIDONINE	FENBENDAZOLE	FLUBENDAZOLE	LOBENDAZOLE	MEBENDAZOLE	NOCODAZOLE	OXFENDAZOLE	OXIBENDAZOLE	PARBENDAZOLE
MELPHALAN	DNA	31	6	CHLORAMBUCIL	CISPLATIN	DIBENZOYLMETHANE	MELPHALAN	THIOTEPA	TRYPTOPHAN
MENADIONE	Oxidative stress (ROS inducers)	32	4	BORTEZOMIB	MENADIONE	PLUMBAGIN	SA792541
MEVASTATIN	HMGCR	33	4	FLUVASTATIN	LOVASTATIN	MEVASTATIN	SIMVASTATIN
NILOTINIB	BCR-ABL fusion	34	4	IMATINIB	NILOTINIB	OSI027	PONATINIB
NOBILETIN	?	35	3	NOBILETIN	PD98059	RHAMNETIN
OLIGOMYCINA	OxPhos blockers	36	5	AMPHOTERICINB	METHYLENEBLUE	NONOXYNOL9	OLIGOMYCINA	OLIGOMYCINC
OXIDOPAMINE	?	37	4	OXIDOPAMINE	PENTAMIDINE	PURPUROGALLIN	TERTBUTYLHYDROQUINONE
PACLITAXEL	microtubules stabilizers	38	3	BACCATINIII	DOCETAXEL	PACLITAXEL
PIMOZIDE	antipsychotic	39	4	ALLANTOIN	CALYCANTHINE	PIMOZIDE	SPIPERONE
PROCARBAZINE	?	40	7	HEXAMETHYLENEBISACETAMIDE	MONASTROL	NITAZOXANIDE	OFLOXACIN	PROCARBAZINE	SULFATHIAZOLE	TREMULACIN
PYRIMETHAMINE	DHFR	41	5	DIPYRIDAMOLE	METHOTREXATE	NIFUROXAZIDE	PEMETREXED	PYRIMETHAMINE
SELUMETINIB	BRAF/MEK	42	5	DABRAFENIB	PD184352	SELUMETINIB	TRAMETINIB	VEMURAFENIB
STAUROSPORINE	protein kinases	43	3	LESTAURTINIB	MIDOSTAURIN	STAUROSPORINE
TEMSIROLIMUS	mTOR	44	5	CYTOCHALASINB	EVEROLIMUS	LY294002	OLAPARIB	TEMSIROLIMUS
TENIPOSIDE	Topoisomerase II	45	5	AMSACRINE	ETOPOSIDE	PODOPHYLLOTOXIN	RAZOXANE	TENIPOSIDE
TERREICACID	?	46	5	ASCORBICACID	NBROMOACETYLTRYPTAMINE	PMSF	PRIMA1	TERREICACID
THIORPHAN	?	47	4	CYCLOPAMINE	HALOPERIDOL	NAVITOCLAX	THIORPHAN
TOPOTECAN	Topoisomerase I	48	4	BISBENZIMIDE	CAMPTOTHECIN	IRINOTECAN	TOPOTECAN
VINBLASTINE	tubulin	49	4	COLCHICINE	VINBLASTINE	VINCRISTINE	VINORELBINE
VORINOSTAT	HDACs	50	5	BELINOSTAT	ENTINOSTAT	PYROXAMIDE	THMI94	VORINOSTAT
WITHAFERINA	Oxidative stress (ROS inducers)	51	6	CELASTROL	HALOPROGIN	OBATOCLAX	PARTHENOLIDE	THAPSIGARGIN	WITHAFERINA

## Sheet: F
	population	number.of.drugs	V1	V2	V3	V4	V5	V6	V7	V8	V9	V10	V11
1	1	3	CLADRIBINE	CLOFARABINE	FLUDARABINE	NA	NA	NA	NA	NA	NA	NA	NA
2	2	4	BERBAMINE	CYCLOPHOSPHAMIDE	FLUCONAZOLE	IFOSFAMIDE	NA	NA	NA	NA	NA	NA	NA
3	3	10	ACTINOMYCIND	ALVOCIDIB	CHROMOMYCINA3	DAUNORUBICIN	DOXORUBICIN	EPIRUBICIN	IDARUBICIN	KENPAULLONE	MITOXANTRONE	ROTENONE	NA
4	4	5	AMONAFIDE	AZACITIDINE	DECITABINE	PHENYLBUTYRATE	TUNICAMYCIN	NA	NA	NA	NA	NA	NA
5	5	10	DEXAMETHASONE	FLUMETHASONE	FLUOCINOLONE	FLUOROMETHOLONE	FLUPHENAZINE	IDEBENONE	ISOFLUPREDONE	METHYLPREDNISOLONE	NICOTINAMIDE	TRIAMCINOLONE	NA
6	6	11	AFATINIB	BOSUTINIB	CRIZOTINIB	DASATINIB	ERLOTINIB	FOSTAMATINIB	GEFITINIB	IBRUTINIB	LAPATINIB	PAZOPANIB	TYRPHOSTINAG1478
7	7	5	CYTARABINE	FLOXURIDINE	GEMCITABINE	IDOXURIDINE	RALTITREXED	NA	NA	NA	NA	NA	NA
8	8	4	IMIQUIMOD	ISOTRETINOIN	MIFEPRISTONE	PROGESTERONE	NA	NA	NA	NA	NA	NA	NA
9	9	3	ABIRATERONE	ITRACONAZOLE	TERCONAZOLE	NA	NA	NA	NA	NA	NA	NA	NA
10	10	5	AXITINIB	CLOFAZIMINE	LORATADINE	RITONAVIR	VALPROICACID	NA	NA	NA	NA	NA	NA
11	11	6	CHLORAMBUCIL	CISPLATIN	DIBENZOYLMETHANE	MELPHALAN	THIOTEPA	TRYPTOPHAN	NA	NA	NA	NA	NA
12	12	4	FLUVASTATIN	LOVASTATIN	MEVASTATIN	SIMVASTATIN	NA	NA	NA	NA	NA	NA	NA
13	13	4	IMATINIB	NILOTINIB	OSI027	PONATINIB	NA	NA	NA	NA	NA	NA	NA
14	14	3	BACCATINIII	DOCETAXEL	PACLITAXEL	NA	NA	NA	NA	NA	NA	NA	NA
15	15	5	DIPYRIDAMOLE	METHOTREXATE	NIFUROXAZIDE	PEMETREXED	PYRIMETHAMINE	NA	NA	NA	NA	NA	NA
16	16	5	DABRAFENIB	PD184352	SELUMETINIB	TRAMETINIB	VEMURAFENIB	NA	NA	NA	NA	NA	NA
17	17	5	CYTOCHALASINB	EVEROLIMUS	LY294002	OLAPARIB	TEMSIROLIMUS	NA	NA	NA	NA	NA	NA
18	18	5	AMSACRINE	ETOPOSIDE	PODOPHYLLOTOXIN	RAZOXANE	TENIPOSIDE	NA	NA	NA	NA	NA	NA
19	19	4	COLCHICINE	VINBLASTINE	VINCRISTINE	VINORELBINE	NA	NA	NA	NA	NA	NA	NA
20	20	5	BELINOSTAT	ENTINOSTAT	PYROXAMIDE	THMI94	VORINOSTAT	NA	NA	NA	NA	NA	NA
