# Supplementary material for: Integrative Cancer Pharmacogenomics to Infer Large-Scale Drug Taxonomy
Source: Oxford University Press journal article supplement (doi:10.1158/0008-5472.can-17-0096), 2017-03-17
Supplement: 00085472can170096-sup-177323_1_supp_3899880_dmkvbv.xlsx [file 00085472can170096-sup-177323_1_supp_3899880_dmkvbv.xlsx]

## Sheet: A.Superpred_CTRP
	AFATINIB	AXITINIB	AZACITIDINE	BELINOSTAT	BORTEZOMIB	BOSUTINIB	CEDIRANIB	CHLORAMBUCIL	CRIZOTINIB	CYCLOPHOSPHAMIDE	DABRAFENIB	DACARBAZINE	DASATINIB	DECITABINE	DOCETAXEL	ERISMODEGIB	ERLOTINIB	ETOPOSIDE	FLUOROURACIL	FLUVASTATIN	FULVESTRANT	GEFITINIB	GEMCITABINE	IBRUTINIB	IFOSFAMIDE	IMATINIB	LAPATINIB	LOVASTATIN	MASITINIB	METHOTREXATE	NILOTINIB	NINTEDANIB	OLAPARIB	PACLITAXEL	PAZOPANIB	PROCHLORPERAZINE	RUXOLITINIB	SIMVASTATIN	SORAFENIB	SUNITINIB	TAMOXIFEN	TEMOZOLOMIDE	TEMSIROLIMUS	TENIPOSIDE	THALIDOMIDE	TIVOZANIB	TOPOTECAN	TRAMETINIB	TRETINOIN
AFATINIB	0	0	-0.0233656	0.306525	-0.0270341	0	0	-0.0190024	0	-0.0190024	-0.0333372	-0.0233285	0	-0.0233656	-0.0190024	-0.0302905	0	-0.0233285	-0.0270341	-0.013405	-0.0303197	0	0	-0.0362568	-0.0233285	0	1	-0.0233656	0	-0.0233285	0	-0.0233656	-0.0360794	-0.0233656	0	-0.013405	0	-0.0304375	-0.0233285	-0.0302905	-0.0437751	-0.0233656	0.303197	-0.0270018	-0.0190024	0	0.27781	0.63733	0.328183
AXITINIB	0	0	0	0	0	0	0	0	0	0	0	0	0	0	0	0	0	0	0	0	0	0	0	0	0	0	0	0	0	0	0	0	0	0	0	0	0	0	0	0	0	0	0	0	0	0	0	0	0
AZACITIDINE	-0.0233656	0	0	-0.037229	-0.0331626	0	0	-0.0233102	0	-0.0233102	-0.0408945	-0.0286169	0	1	-0.0233102	-0.0371572	0	0.308426	0.276355	-0.0164438	-0.037193	0	0	-0.044476	-0.0286169	0	-0.0233656	-0.0286624	0	-0.0286169	0	-0.0286624	-0.0442583	-0.0286624	0	-0.0164438	0	-0.0373375	-0.0286169	-0.0371572	-0.0536986	-0.0286624	-0.037193	0.262223	-0.0233102	0	-0.0408945	-0.037229	-0.0332024
BELINOSTAT	0.306525	0	-0.037229	0	-0.0430741	0	0	-0.030277	0	-0.030277	-0.053117	-0.0371698	0	-0.037229	-0.030277	0.146718	0	-0.0371698	-0.0430741	-0.0213586	-0.0483092	0	0	-0.0577688	-0.0371698	0	0.306525	-0.037229	0	-0.0371698	0	-0.037229	-0.0574861	-0.037229	0	-0.0213586	0	-0.0484968	-0.0371698	-0.0482626	-0.069748	-0.037229	-0.0483092	-0.0430226	-0.030277	0	0.152269	0.371373	0.19191
BORTEZOMIB	-0.0270341	0	-0.0331626	-0.0430741	0	0	0	-0.02697	0	-0.02697	-0.0473152	-0.0331099	0	-0.0331626	-0.02697	-0.0429911	0	-0.0331099	-0.0383693	-0.0190256	-0.0430326	0	0	0.148863	-0.0331099	0	-0.0270341	-0.0331626	0	-0.0331099	0	-0.0331626	-0.0512071	-0.0331626	0	-0.0190256	0	-0.0431997	-0.0331099	-0.0429911	-0.0621296	-0.0331626	-0.0430326	-0.0383234	-0.02697	0	-0.0473152	-0.0430741	-0.0384154
BOSUTINIB	0	0	0	0	0	0	0	0	0	0	0	0	0	0	0	0	0	0	0	0	0	0	0	0	0	0	0	0	0	0	0	0	0	0	0	0	0	0	0	0	0	0	0	0	0	0	0	0	0
CEDIRANIB	0	0	0	0	0	0	0	0	0	0	0	0	0	0	0	0	0	0	0	0	0	0	0	0	0	0	0	0	0	0	0	0	0	0	0	0	0	0	0	0	0	0	0	0	0	0	0	0	0
CHLORAMBUCIL	-0.0190024	0	-0.0233102	-0.030277	-0.02697	0	0	0	0	0.49763	-0.0332581	-0.0232731	0	-0.0233102	-0.0189573	-0.0302187	0	-0.0232731	-0.02697	-0.0133732	-0.0302478	0	0	-0.0361708	0.403401	0	-0.0190024	-0.0233102	0	-0.0232731	0	-0.0233102	-0.0359938	-0.0233102	0	-0.0133732	0	-0.0303653	-0.0232731	-0.0302187	-0.0436712	-0.0233102	-0.0302478	-0.0269377	-0.0189573	0	-0.0332581	-0.030277	-0.0270024
CRIZOTINIB	0	0	0	0	0	0	0	0	0	0	0	0	0	0	0	0	0	0	0	0	0	0	0	0	0	0	0	0	0	0	0	0	0	0	0	0	0	0	0	0	0	0	0	0	0	0	0	0	0
CYCLOPHOSPHAMIDE	-0.0190024	0	-0.0233102	-0.030277	-0.02697	0	0	0.49763	0	0	-0.0332581	-0.0232731	0	-0.0233102	-0.0189573	-0.0302187	0	-0.0232731	-0.02697	-0.0133732	-0.0302478	0	0	-0.0361708	0.403401	0	-0.0190024	-0.0233102	0	-0.0232731	0	-0.0233102	-0.0359938	-0.0233102	0	-0.0133732	0	-0.0303653	-0.0232731	-0.0302187	-0.0436712	-0.0233102	-0.0302478	-0.0269377	-0.0189573	0	-0.0332581	-0.030277	-0.0270024
DABRAFENIB	-0.0333372	0	-0.0408945	-0.053117	-0.0473152	0	0	-0.0332581	0	-0.0332581	0	-0.0408296	0	-0.0408945	-0.0332581	-0.0530145	0	-0.0408296	-0.0473152	-0.0234615	-0.0530657	0	0	-0.0634567	-0.0408296	0	-0.0333372	-0.0408945	0	-0.0408296	0	-0.0408945	-0.0631462	-0.0408945	0	-0.0234615	0	-0.0532718	-0.0408296	-0.0530145	-0.0766153	-0.0408945	-0.0530657	-0.0472586	-0.0332581	0	-0.0583468	-0.053117	-0.047372
DACARBAZINE	-0.0233285	0	-0.0286169	-0.0371698	-0.0331099	0	0	-0.0232731	0	-0.0232731	-0.0408296	0	0	-0.0286169	-0.0232731	-0.0370982	0	-0.0285714	-0.0331099	-0.0164177	-0.0371339	0	0	-0.0444053	-0.0285714	0	-0.0233285	-0.0286169	0	-0.0285714	0	-0.0286169	-0.044188	-0.0286169	0	-0.0164177	0	-0.0372782	-0.0285714	-0.0370982	-0.0536133	0.311606	-0.0371339	-0.0330703	-0.0232731	0	-0.0408296	-0.0371698	-0.0331497
DASATINIB	0	0	0	0	0	0	0	0	0	0	0	0	0	0	0	0	0	0	0	0	0	0	0	0	0	0	0	0	0	0	0	0	0	0	0	0	0	0	0	0	0	0	0	0	0	0	0	0	0
DECITABINE	-0.0233656	0	1	-0.037229	-0.0331626	0	0	-0.0233102	0	-0.0233102	-0.0408945	-0.0286169	0	0	-0.0233102	-0.0371572	0	0.308426	0.276355	-0.0164438	-0.037193	0	0	-0.044476	-0.0286169	0	-0.0233656	-0.0286624	0	-0.0286169	0	-0.0286624	-0.0442583	-0.0286624	0	-0.0164438	0	-0.0373375	-0.0286169	-0.0371572	-0.0536986	-0.0286624	-0.037193	0.262223	-0.0233102	0	-0.0408945	-0.037229	-0.0332024
DOCETAXEL	-0.0190024	0	-0.0233102	-0.030277	-0.02697	0	0	-0.0189573	0	-0.0189573	-0.0332581	-0.0232731	0	-0.0233102	0	-0.0302187	0	-0.0232731	-0.02697	-0.0133732	-0.0302478	0	0	-0.0361708	-0.0232731	0	-0.0190024	-0.0233102	0	-0.0232731	0	-0.0233102	-0.0359938	0.404043	0	-0.0133732	0	-0.0303653	-0.0232731	-0.0302187	-0.0436712	-0.0233102	-0.0302478	-0.0269377	-0.0189573	0	-0.0332581	-0.030277	-0.0270024
ERISMODEGIB	-0.0302905	0	-0.0371572	0.146718	-0.0429911	0	0	-0.0302187	0	-0.0302187	-0.0530145	-0.0370982	0	-0.0371572	-0.0302187	0	0	-0.0370982	-0.0429911	-0.0213174	-0.048216	0	0	-0.0576574	-0.0370982	0	-0.0302905	-0.0371572	0	-0.0370982	0	-0.0371572	-0.0573753	-0.0371572	0	-0.0213174	0	-0.0484033	-0.0370982	-0.0481696	-0.0696134	-0.0371572	0.171649	-0.0429396	-0.0302187	0	-0.0530145	-0.0482626	-0.0430427
ERLOTINIB	0	0	0	0	0	0	0	0	0	0	0	0	0	0	0	0	0	0	0	0	0	0	0	0	0	0	0	0	0	0	0	0	0	0	0	0	0	0	0	0	0	0	0	0	0	0	0	0	0
ETOPOSIDE	-0.0233285	0	0.308426	-0.0371698	-0.0331099	0	0	-0.0232731	0	-0.0232731	-0.0408296	-0.0285714	0	0.308426	-0.0232731	-0.0370982	0	0	-0.0331099	-0.0164177	-0.0371339	0	0	-0.0444053	-0.0285714	0	-0.0233285	-0.0286169	0	-0.0285714	0	-0.0286169	-0.044188	-0.0286169	0	-0.0164177	0	-0.0372782	-0.0285714	-0.0370982	-0.0536133	-0.0286169	-0.0371339	0.575974	-0.0232731	0	-0.0408296	-0.0371698	-0.0331497
FLUOROURACIL	-0.0270341	0	0.276355	-0.0430741	-0.0383693	0	0	-0.02697	0	-0.02697	-0.0473152	-0.0331099	0	0.276355	-0.02697	-0.0429911	0	-0.0331099	0	-0.0190256	-0.0430326	0	0	-0.0514589	-0.0331099	0	-0.0270341	-0.0331626	0	-0.0331099	0	-0.0331626	-0.0512071	-0.0331626	0	-0.0190256	0	-0.0431997	-0.0331099	-0.0429911	-0.0621296	-0.0331626	-0.0430326	-0.0383234	-0.02697	0	-0.0473152	-0.0430741	-0.0384154
FLUVASTATIN	-0.013405	0	-0.0164438	-0.0213586	-0.0190256	0	0	-0.0133732	0	-0.0133732	-0.0234615	-0.0164177	0	-0.0164438	-0.0133732	-0.0213174	0	-0.0164177	-0.0190256	0	-0.0213379	0	0	-0.0255162	-0.0164177	0	-0.013405	0.575535	0	-0.0164177	0	-0.0164438	-0.0253913	-0.0164438	0	-0.00943396	0	0.454121	-0.0164177	-0.0213174	-0.0308073	-0.0164438	-0.0213379	-0.0190029	-0.0133732	0	-0.0234615	-0.0213586	-0.0190485
FULVESTRANT	-0.0303197	0	-0.037193	-0.0483092	-0.0430326	0	0	-0.0302478	0	-0.0302478	-0.0530657	-0.0371339	0	-0.037193	-0.0302478	-0.048216	0	-0.0371339	-0.0430326	-0.0213379	0	0	0	-0.057713	-0.0371339	0	-0.0303197	-0.037193	0	-0.0371339	0	-0.037193	-0.0574306	-0.037193	0	-0.0213379	0	-0.04845	-0.0371339	-0.048216	-0.0696806	-0.037193	-0.0482625	-0.042981	-0.0302478	0	-0.0530657	-0.0483092	-0.0430842
GEFITINIB	0	0	0	0	0	0	0	0	0	0	0	0	0	0	0	0	0	0	0	0	0	0	0	0	0	0	0	0	0	0	0	0	0	0	0	0	0	0	0	0	0	0	0	0	0	0	0	0	0
GEMCITABINE	0	0	0	0	0	0	0	0	0	0	0	0	0	0	0	0	0	0	0	0	0	0	0	0	0	0	0	0	0	0	0	0	0	0	0	0	0	0	0	0	0	0	0	0	0	0	0	0	0
IBRUTINIB	-0.0362568	0	-0.044476	-0.0577688	0.148863	0	0	-0.0361708	0	-0.0361708	-0.0634567	-0.0444053	0	-0.044476	-0.0361708	-0.0576574	0	-0.0444053	-0.0514589	-0.0255162	-0.057713	0	0	0	-0.0444053	0	-0.0362568	-0.044476	0	-0.0444053	0	-0.044476	-0.0686764	-0.044476	0	-0.0255162	0	-0.0579372	-0.0444053	-0.0576574	-0.0833251	-0.044476	-0.057713	-0.0513973	-0.0361708	0	-0.0634567	-0.0577688	-0.0515208
IFOSFAMIDE	-0.0233285	0	-0.0286169	-0.0371698	-0.0331099	0	0	0.403401	0	0.403401	-0.0408296	-0.0285714	0	-0.0286169	-0.0232731	-0.0370982	0	-0.0285714	-0.0331099	-0.0164177	-0.0371339	0	0	-0.0444053	0	0	-0.0233285	-0.0286169	0	-0.0285714	0	-0.0286169	-0.044188	-0.0286169	0	-0.0164177	0	-0.0372782	-0.0285714	0.215169	0.142969	-0.0286169	-0.0371339	-0.0330703	-0.0232731	0	-0.0408296	-0.0371698	-0.0331497
IMATINIB	0	0	0	0	0	0	0	0	0	0	0	0	0	0	0	0	0	0	0	0	0	0	0	0	0	0	0	0	0	0	0	0	0	0	0	0	0	0	0	0	0	0	0	0	0	0	0	0	0
LAPATINIB	1	0	-0.0233656	0.306525	-0.0270341	0	0	-0.0190024	0	-0.0190024	-0.0333372	-0.0233285	0	-0.0233656	-0.0190024	-0.0302905	0	-0.0233285	-0.0270341	-0.013405	-0.0303197	0	0	-0.0362568	-0.0233285	0	0	-0.0233656	0	-0.0233285	0	-0.0233656	-0.0360794	-0.0233656	0	-0.013405	0	-0.0304375	-0.0233285	-0.0302905	-0.0437751	-0.0233656	0.303197	-0.0270018	-0.0190024	0	0.27781	0.63733	0.328183
LOVASTATIN	-0.0233656	0	-0.0286624	-0.037229	-0.0331626	0	0	-0.0233102	0	-0.0233102	-0.0408945	-0.0286169	0	-0.0286624	-0.0233102	-0.0371572	0	-0.0286169	-0.0331626	0.575535	-0.037193	0	0	-0.044476	-0.0286169	0	-0.0233656	0	0	-0.0286169	0	-0.0286624	-0.0442583	-0.0286624	0	-0.0164438	0	0.241449	-0.0286169	-0.0371572	-0.0536986	-0.0286624	-0.037193	-0.0331229	-0.0233102	0	-0.0408945	-0.037229	-0.0332024
MASITINIB	0	0	0	0	0	0	0	0	0	0	0	0	0	0	0	0	0	0	0	0	0	0	0	0	0	0	0	0	0	0	0	0	0	0	0	0	0	0	0	0	0	0	0	0	0	0	0	0	0
METHOTREXATE	-0.0233285	0	-0.0286169	-0.0371698	-0.0331099	0	0	-0.0232731	0	-0.0232731	-0.0408296	-0.0285714	0	-0.0286169	-0.0232731	-0.0370982	0	-0.0285714	-0.0331099	-0.0164177	-0.0371339	0	0	-0.0444053	-0.0285714	0	-0.0233285	-0.0286169	0	0	0	0.311606	-0.044188	-0.0286169	0	-0.0164177	0	-0.0372782	-0.0285714	-0.0370982	-0.0536133	-0.0286169	-0.0371339	-0.0330703	-0.0232731	0	-0.0408296	-0.0371698	-0.0331497
NILOTINIB	0	0	0	0	0	0	0	0	0	0	0	0	0	0	0	0	0	0	0	0	0	0	0	0	0	0	0	0	0	0	0	0	0	0	0	0	0	0	0	0	0	0	0	0	0	0	0	0	0
NINTEDANIB	-0.0233656	0	-0.0286624	-0.037229	-0.0331626	0	0	-0.0233102	0	-0.0233102	-0.0408945	-0.0286169	0	-0.0286624	-0.0233102	-0.0371572	0	-0.0286169	-0.0331626	-0.0164438	-0.037193	0	0	-0.044476	-0.0286169	0	-0.0233656	-0.0286624	0	0.311606	0	0	-0.0442583	-0.0286624	0	-0.0164438	0	-0.0373375	-0.0286169	-0.0371572	-0.0536986	-0.0286624	-0.037193	-0.0331229	-0.0233102	0	-0.0408945	-0.037229	-0.0332024
OLAPARIB	-0.0360794	0	-0.0442583	-0.0574861	-0.0512071	0	0	-0.0359938	0	-0.0359938	-0.0631462	-0.044188	0	-0.0442583	-0.0359938	-0.0573753	0	-0.044188	-0.0512071	-0.0253913	-0.0574306	0	0	-0.0686764	-0.044188	0	-0.0360794	-0.0442583	0	-0.044188	0	-0.0442583	0	-0.0442583	0	-0.0253913	0	-0.0576537	-0.044188	-0.0573753	0.0450123	-0.0442583	-0.0574306	-0.0511458	-0.0359938	0	-0.0631462	-0.0574861	-0.0512686
PACLITAXEL	-0.0233656	0	-0.0286624	-0.037229	-0.0331626	0	0	-0.0233102	0	-0.0233102	-0.0408945	-0.0286169	0	-0.0286624	0.404043	-0.0371572	0	-0.0286169	-0.0331626	-0.0164438	-0.037193	0	0	-0.044476	-0.0286169	0	-0.0233656	-0.0286624	0	-0.0286169	0	-0.0286624	-0.0442583	0	0	-0.0164438	0	-0.0373375	-0.0286169	-0.0371572	-0.0536986	-0.0286624	-0.037193	-0.0331229	-0.0233102	0	-0.0408945	-0.037229	-0.0332024
PAZOPANIB	0	0	0	0	0	0	0	0	0	0	0	0	0	0	0	0	0	0	0	0	0	0	0	0	0	0	0	0	0	0	0	0	0	0	0	0	0	0	0	0	0	0	0	0	0	0	0	0	0
PROCHLORPERAZINE	-0.013405	0	-0.0164438	-0.0213586	-0.0190256	0	0	-0.0133732	0	-0.0133732	-0.0234615	-0.0164177	0	-0.0164438	-0.0133732	-0.0213174	0	-0.0164177	-0.0190256	-0.00943396	-0.0213379	0	0	-0.0255162	-0.0164177	0	-0.013405	-0.0164438	0	-0.0164177	0	-0.0164438	-0.0253913	-0.0164438	0	0	0	-0.0214208	-0.0164177	-0.0213174	-0.0308073	-0.0164438	-0.0213379	-0.0190029	-0.0133732	0	-0.0234615	-0.0213586	-0.0190485
RUXOLITINIB	0	0	0	0	0	0	0	0	0	0	0	0	0	0	0	0	0	0	0	0	0	0	0	0	0	0	0	0	0	0	0	0	0	0	0	0	0	0	0	0	0	0	0	0	0	0	0	0	0
SIMVASTATIN	-0.0304375	0	-0.0373375	-0.0484968	-0.0431997	0	0	-0.0303653	0	-0.0303653	-0.0532718	-0.0372782	0	-0.0373375	-0.0303653	-0.0484033	0	-0.0372782	-0.0431997	0.454121	-0.04845	0	0	-0.0579372	-0.0372782	0	-0.0304375	0.241449	0	-0.0372782	0	-0.0373375	-0.0576537	-0.0373375	0	-0.0214208	0	0	-0.0372782	-0.0484033	-0.0699512	-0.0373375	-0.04845	-0.043148	-0.0303653	0	0.127852	-0.0484968	-0.0432516
SORAFENIB	-0.0233285	0	-0.0286169	-0.0371698	-0.0331099	0	0	-0.0232731	0	-0.0232731	-0.0408296	-0.0285714	0	-0.0286169	-0.0232731	-0.0370982	0	-0.0285714	-0.0331099	-0.0164177	-0.0371339	0	0	-0.0444053	-0.0285714	0	-0.0233285	-0.0286169	0	-0.0285714	0	-0.0286169	-0.044188	-0.0286169	0	-0.0164177	0	-0.0372782	0	-0.0370982	-0.0536133	-0.0286169	-0.0371339	-0.0330703	-0.0232731	0	-0.0408296	-0.0371698	-0.0331497
SUNITINIB	-0.0302905	0	-0.0371572	-0.0482626	-0.0429911	0	0	-0.0302187	0	-0.0302187	-0.0530145	-0.0370982	0	-0.0371572	-0.0302187	-0.0481696	0	-0.0370982	-0.0429911	-0.0213174	-0.048216	0	0	-0.0576574	0.215169	0	-0.0302905	-0.0371572	0	-0.0370982	0	-0.0371572	-0.0573753	-0.0371572	0	-0.0213174	0	-0.0484033	-0.0370982	0	0.0821439	-0.0371572	-0.048216	-0.0429396	-0.0302187	0	-0.0530145	-0.0482626	-0.0430427
TAMOXIFEN	-0.0437751	0	-0.0536986	-0.069748	-0.0621296	0	0	-0.0436712	0	-0.0436712	-0.0766153	-0.0536133	0	-0.0536986	-0.0436712	-0.0696134	0	-0.0536133	-0.0621296	-0.0308073	-0.0696806	0	0	-0.0833251	0.142969	0	-0.0437751	-0.0536986	0	-0.0536133	0	-0.0536986	0.0450123	-0.0536986	0	-0.0308073	0	-0.0699512	-0.0536133	0.0821439	0	-0.0536986	-0.0696806	-0.0620553	-0.0436712	0	-0.0766153	-0.069748	-0.0622043
TEMOZOLOMIDE	-0.0233656	0	-0.0286624	-0.037229	-0.0331626	0	0	-0.0233102	0	-0.0233102	-0.0408945	0.311606	0	-0.0286624	-0.0233102	-0.0371572	0	-0.0286169	-0.0331626	-0.0164438	-0.037193	0	0	-0.044476	-0.0286169	0	-0.0233656	-0.0286624	0	-0.0286169	0	-0.0286624	-0.0442583	-0.0286624	0	-0.0164438	0	-0.0373375	-0.0286169	-0.0371572	-0.0536986	0	-0.037193	-0.0331229	-0.0233102	0	-0.0408945	-0.037229	-0.0332024
TEMSIROLIMUS	0.303197	0	-0.037193	-0.0483092	-0.0430326	0	0	-0.0302478	0	-0.0302478	-0.0530657	-0.0371339	0	-0.037193	-0.0302478	0.171649	0	-0.0371339	-0.0430326	-0.0213379	-0.0482625	0	0	-0.057713	-0.0371339	0	0.303197	-0.037193	0	-0.0371339	0	-0.037193	-0.0574306	-0.037193	0	-0.0213379	0	-0.04845	-0.0371339	-0.048216	-0.0696806	-0.037193	0	-0.042981	-0.0302478	0	-0.0530657	0.171981	0.180954
TENIPOSIDE	-0.0270018	0	0.262223	-0.0430226	-0.0383234	0	0	-0.0269377	0	-0.0269377	-0.0472586	-0.0330703	0	0.262223	-0.0269377	-0.0429396	0	0.575974	-0.0383234	-0.0190029	-0.042981	0	0	-0.0513973	-0.0330703	0	-0.0270018	-0.0331229	0	-0.0330703	0	-0.0331229	-0.0511458	-0.0331229	0	-0.0190029	0	-0.043148	-0.0330703	-0.0429396	-0.0620553	-0.0331229	-0.042981	0	-0.0269377	0	-0.0472586	-0.0430226	-0.0383694
THALIDOMIDE	-0.0190024	0	-0.0233102	-0.030277	-0.02697	0	0	-0.0189573	0	-0.0189573	-0.0332581	-0.0232731	0	-0.0233102	-0.0189573	-0.0302187	0	-0.0232731	-0.02697	-0.0133732	-0.0302478	0	0	-0.0361708	-0.0232731	0	-0.0190024	-0.0233102	0	-0.0232731	0	-0.0233102	-0.0359938	-0.0233102	0	-0.0133732	0	-0.0303653	-0.0232731	-0.0302187	-0.0436712	-0.0233102	-0.0302478	-0.0269377	0	0	-0.0332581	-0.030277	-0.0270024
TIVOZANIB	0	0	0	0	0	0	0	0	0	0	0	0	0	0	0	0	0	0	0	0	0	0	0	0	0	0	0	0	0	0	0	0	0	0	0	0	0	0	0	0	0	0	0	0	0	0	0	0	0
TOPOTECAN	0.27781	0	-0.0408945	0.152269	-0.0473152	0	0	-0.0332581	0	-0.0332581	-0.0583468	-0.0408296	0	-0.0408945	-0.0332581	-0.0530145	0	-0.0408296	-0.0473152	-0.0234615	-0.0530657	0	0	-0.0634567	-0.0408296	0	0.27781	-0.0408945	0	-0.0408296	0	-0.0408945	-0.0631462	-0.0408945	0	-0.0234615	0	0.127852	-0.0408296	-0.0530145	-0.0766153	-0.0408945	-0.0530657	-0.0472586	-0.0332581	0	0	0.148728	0.16975
TRAMETINIB	0.63733	0	-0.037229	0.371373	-0.0430741	0	0	-0.030277	0	-0.030277	-0.053117	-0.0371698	0	-0.037229	-0.030277	-0.0482626	0	-0.0371698	-0.0430741	-0.0213586	-0.0483092	0	0	-0.0577688	-0.0371698	0	0.63733	-0.037229	0	-0.0371698	0	-0.037229	-0.0574861	-0.037229	0	-0.0213586	0	-0.0484968	-0.0371698	-0.0482626	-0.069748	-0.037229	0.171981	-0.0430226	-0.030277	0	0.148728	0	0.187598
TRETINOIN	0.328183	0	-0.0332024	0.19191	-0.0384154	0	0	-0.0270024	0	-0.0270024	-0.047372	-0.0331497	0	-0.0332024	-0.0270024	-0.0430427	0	-0.0331497	-0.0384154	-0.0190485	-0.0430842	0	0	-0.0515208	-0.0331497	0	0.328183	-0.0332024	0	-0.0331497	0	-0.0332024	-0.0512686	-0.0332024	0	-0.0190485	0	-0.0432516	-0.0331497	-0.0430427	-0.0622043	-0.0332024	0.180954	-0.0383694	-0.0270024	0	0.16975	0.187598	0
TRIFLUOPERAZINE	-0.0233656	0	-0.0286624	-0.037229	-0.0331626	0	0	-0.0233102	0	-0.0233102	-0.0408945	-0.0286169	0	-0.0286624	-0.0233102	-0.0371572	0	-0.0286169	-0.0331626	-0.0164438	-0.037193	0	0	-0.044476	-0.0286169	0	-0.0233656	-0.0286624	0	-0.0286169	0	-0.0286624	-0.0442583	-0.0286624	0	0.581016	0	-0.0373375	-0.0286169	-0.0371572	-0.0536986	-0.0286624	-0.037193	-0.0331229	-0.0233102	0	-0.0408945	-0.037229	-0.0332024
VORINOSTAT	-0.0270341	0	-0.0331626	-0.0430741	-0.0383693	0	0	0.320269	0	-0.02697	-0.0473152	-0.0331099	0	-0.0331626	-0.02697	-0.0429911	0	-0.0331099	-0.0383693	-0.0190256	-0.0430326	0	0	-0.0514589	0.264879	0	-0.0270341	-0.0331626	0	-0.0331099	0	-0.0331626	-0.0512071	-0.0331626	0	-0.0190256	0	-0.0431997	-0.0331099	0.187011	0.116493	-0.0331626	-0.0430326	-0.0383234	-0.02697	0	-0.0473152	-0.0430741	-0.0384154
[truncated: 2 more columns]

## Sheet: B.Superpred_NCI60
	AFATINIB	AMPHOTERICINB	ARTEMETHER	ARTESUNATE	AXITINIB	AZACITIDINE	BELINOSTAT	BORTEZOMIB	BOSUTINIB	CELECOXIB	CHLORAMBUCIL	CLADRIBINE	CLIOQUINOL	CLOFARABINE	CLOTRIMAZOLE	CRIZOTINIB	CYCLOPHOSPHAMIDE	CYTARABINE	DABRAFENIB	DASATINIB	DAUNORUBICIN	DECITABINE	DEXAMETHASONE	DOCETAXEL	DOXORUBICIN	ERLOTINIB	ETOPOSIDE	EVEROLIMUS	FLUCONAZOLE	FLUOROMETHOLONE	FLUOROURACIL	FLUVASTATIN	FULVESTRANT	GEFITINIB	GEMCITABINE	IBRUTINIB	IDARUBICIN	IDOXURIDINE	IFOSFAMIDE	IMATINIB	IMIQUIMOD	IRINOTECAN	ITRACONAZOLE	LAPATINIB	LEFLUNOMIDE	LOVASTATIN	MELPHALAN	METHOTREXATE	METHYLPREDNISOLONE
AFATINIB	0	-0.024734	-0.00921317	-0.0160272	0	-0.0160272	0.309583	-0.0185319	0	-0.0207637	-0.0130506	-0.0208187	-0.0185319	-0.0228792	-0.0185319	0	-0.0130506	-0.0160272	-0.0228032	0	-0.0130719	-0.0160272	-0.0327781	-0.0130506	-0.0130719	0	-0.0160097	0.254043	-0.0185319	-0.0247933	-0.0185319	-0.00921317	-0.0207637	0	0	-0.0247458	-0.0130506	-0.0160097	-0.0160097	0	-0.0246869	0.281551	-0.0227906	1	-0.0207774	-0.0160272	-0.0160097	-0.0160097	-0.00921317
AMPHOTERICINB	-0.024734	0	-0.0174327	-0.0303259	0	-0.0303259	-0.039314	-0.0350652	0	-0.039288	-0.0246937	-0.0393921	-0.0350652	-0.0432908	-0.0350652	0	-0.0246937	-0.0303259	-0.0431471	0	-0.024734	-0.0303259	-0.062021	-0.0246937	-0.024734	0	-0.0302928	-0.0467335	-0.0350652	-0.0469125	-0.0350652	-0.0174327	-0.039288	0	0	-0.0468227	-0.0246937	-0.0302928	-0.0302928	0	-0.0467112	-0.0431949	-0.0431233	-0.024734	-0.039314	-0.0303259	-0.0302928	-0.0302928	-0.0174327
ARTEMETHER	-0.00921317	-0.0174327	0	0.579866	0	-0.0112961	-0.0146441	-0.0130614	0	-0.0146344	-0.00919815	-0.0146732	-0.0130614	-0.0161254	-0.0130614	0	-0.00919815	-0.0112961	-0.0160719	0	-0.00921317	-0.0112961	-0.0231022	-0.00919815	-0.00921317	0	-0.0112838	-0.0174078	-0.0130614	-0.0174745	-0.0130614	-0.00649351	-0.0146344	0	0	-0.017441	-0.00919815	-0.0112838	-0.0112838	0	-0.0173995	-0.0160897	-0.016063	-0.00921317	-0.0146441	-0.0112961	-0.0112838	-0.0112838	-0.00649351
ARTESUNATE	-0.0160272	-0.0303259	0.579866	0	0	-0.0196507	-0.0254748	-0.0227216	0	-0.025458	-0.0160011	-0.0255254	-0.0227216	-0.0280517	-0.0227216	0	-0.0160011	-0.0196507	-0.0279586	0	-0.0160272	-0.0196507	-0.0401886	-0.0160011	-0.0160272	0	-0.0196292	-0.0302825	-0.0227216	-0.0303985	-0.0227216	-0.0112961	-0.025458	0	0	-0.0303404	-0.0160011	-0.0196292	-0.0196292	0	-0.0302681	-0.0279895	-0.0279432	-0.0160272	-0.0254748	-0.0196507	-0.0196292	0.311887	-0.0112961
AXITINIB	0	0	0	0	0	0	0	0	0	0	0	0	0	0	0	0	0	0	0	0	0	0	0	0	0	0	0	0	0	0	0	0	0	0	0	0	0	0	0	0	0	0	0	0	0	0	0	0	0
AZACITIDINE	-0.0160272	-0.0303259	-0.0112961	-0.0196507	0	0	-0.0254748	-0.0227216	0	-0.025458	-0.0160011	0.234834	-0.0227216	0.210388	-0.0227216	0	-0.0160011	0.663755	-0.0279586	0	-0.0160272	1	-0.0401886	-0.0160011	-0.0160272	0	0.316249	-0.0302825	-0.0227216	-0.0303985	0.280234	-0.0112961	-0.025458	0	0	-0.0303404	-0.0160011	0.652127	-0.0196292	0	0.417988	-0.0279895	-0.0279432	-0.0160272	-0.0254748	-0.0196507	-0.0196292	-0.0196292	-0.0112961
BELINOSTAT	0.309583	-0.039314	-0.0146441	-0.0254748	0	-0.0254748	0	-0.029456	0	-0.0330033	-0.0207435	-0.0330907	-0.029456	-0.0363658	-0.029456	0	-0.0207435	-0.0254748	-0.0362451	0	-0.0207774	-0.0254748	-0.0520998	-0.0207435	-0.0207774	0	-0.025447	-0.0392578	-0.029456	-0.0394082	-0.029456	-0.0146441	-0.0330033	0	0	-0.0393327	-0.0207435	-0.025447	-0.025447	0	-0.0392391	0.162074	-0.0362251	0.309583	0.166446	-0.0254748	-0.025447	-0.025447	-0.0146441
BORTEZOMIB	-0.0185319	-0.0350652	-0.0130614	-0.0227216	0	-0.0227216	-0.029456	0	0	-0.0294365	-0.0185017	-0.0295145	-0.0262726	-0.0324357	-0.0262726	0	-0.0185017	-0.0227216	-0.032328	0	-0.0185319	-0.0227216	-0.0464692	-0.0185017	-0.0185319	0	-0.0226969	-0.035015	-0.0262726	-0.0351492	-0.0262726	-0.0130614	-0.0294365	0	0	0.161627	-0.0185017	-0.0226969	-0.0226969	0	-0.0349984	-0.0323637	-0.0323101	-0.0185319	-0.029456	-0.0227216	-0.0226969	-0.0226969	-0.0130614
BOSUTINIB	0	0	0	0	0	0	0	0	0	0	0	0	0	0	0	0	0	0	0	0	0	0	0	0	0	0	0	0	0	0	0	0	0	0	0	0	0	0	0	0	0	0	0	0	0	0	0	0	0
CELECOXIB	-0.0207637	-0.039288	-0.0146344	-0.025458	0	-0.025458	-0.0330033	-0.0294365	0	0	-0.0207299	-0.0330689	-0.0294365	-0.0363418	-0.0294365	0	-0.0207299	-0.025458	0.341686	0	-0.0207637	-0.025458	0.0798337	-0.0207299	-0.0207637	0	-0.0254302	0.141235	-0.0294365	-0.0393822	-0.0294365	-0.0146344	-0.0329815	0	0	-0.0393068	-0.0207299	-0.0254302	-0.0254302	0	0.134445	-0.0362613	-0.0362012	-0.0207637	-0.0330033	-0.025458	-0.0254302	-0.0254302	-0.0146344
CHLORAMBUCIL	-0.0130506	-0.0246937	-0.00919815	-0.0160011	0	-0.0160011	-0.0207435	-0.0185017	0	-0.0207299	0	-0.0207848	-0.0185017	-0.0228419	-0.0185017	0	0.498371	-0.0160011	-0.0227661	0	-0.0130506	-0.0160011	-0.0327246	-0.0130293	-0.0130506	0	-0.0159836	-0.0246584	-0.0185017	-0.0247528	-0.0185017	-0.00919815	-0.0207299	0	0	-0.0247055	-0.0130293	-0.0159836	0.404919	0	-0.0246466	-0.0227913	-0.0227535	-0.0130506	-0.0207435	-0.0160011	0.404919	-0.0159836	-0.00919815
CLADRIBINE	-0.0208187	-0.0393921	-0.0146732	-0.0255254	0	0.234834	-0.0330907	-0.0295145	0	-0.0330689	-0.0207848	0	-0.0295145	0.910953	-0.0295145	0	-0.0207848	-0.0255254	-0.0363171	0	-0.0208187	0.234834	-0.0522034	-0.0207848	-0.0208187	0	0.236278	-0.0393358	-0.0295145	-0.0394865	-0.0295145	-0.0146732	-0.0330689	0	0	-0.0394109	-0.0207848	0.494653	-0.0254976	0	0.299933	-0.0363573	-0.0362971	-0.0208187	-0.0330907	-0.0255254	-0.0254976	-0.0254976	-0.0146732
CLIOQUINOL	-0.0185319	-0.0350652	-0.0130614	-0.0227216	0	-0.0227216	-0.029456	-0.0262726	0	-0.0294365	-0.0185017	-0.0295145	0	-0.0324357	-0.0262726	0	-0.0185017	-0.0227216	-0.032328	0	-0.0185319	-0.0227216	-0.0464692	-0.0185017	-0.0185319	0	-0.0226969	-0.035015	-0.0262726	-0.0351492	-0.0262726	-0.0130614	-0.0294365	0	0	-0.0350819	-0.0185017	-0.0226969	-0.0226969	0	-0.0349984	-0.0323637	-0.0323101	-0.0185319	-0.029456	-0.0227216	-0.0226969	-0.0226969	-0.0130614
CLOFARABINE	-0.0228792	-0.0432908	-0.0161254	-0.0280517	0	0.210388	-0.0363658	-0.0324357	0	-0.0363418	-0.0228419	0.910953	-0.0324357	0	-0.0324357	0	-0.0228419	-0.0280517	-0.0399115	0	-0.0228792	0.210388	-0.0573701	-0.0228419	-0.0228792	0	0.211716	0.112189	-0.0324357	-0.0433946	-0.0324357	-0.0161254	-0.0363418	0	0	-0.0433115	-0.0228419	0.448339	-0.0280212	0	0.422825	0.130966	-0.0398895	-0.0228792	-0.0363658	-0.0280517	-0.0280212	-0.0280212	-0.0161254
CLOTRIMAZOLE	-0.0185319	-0.0350652	-0.0130614	-0.0227216	0	-0.0227216	-0.029456	-0.0262726	0	-0.0294365	-0.0185017	-0.0295145	-0.0262726	-0.0324357	0	0	-0.0185017	-0.0227216	-0.032328	0	-0.0185319	-0.0227216	-0.0464692	-0.0185017	-0.0185319	0	-0.0226969	-0.035015	0.482759	-0.0351492	-0.0262726	-0.0130614	-0.0294365	0	0	-0.0350819	-0.0185017	-0.0226969	-0.0226969	0	-0.0349984	-0.0323637	0.393106	-0.0185319	-0.029456	-0.0227216	-0.0226969	-0.0226969	-0.0130614
CRIZOTINIB	0	0	0	0	0	0	0	0	0	0	0	0	0	0	0	0	0	0	0	0	0	0	0	0	0	0	0	0	0	0	0	0	0	0	0	0	0	0	0	0	0	0	0	0	0	0	0	0	0
CYCLOPHOSPHAMIDE	-0.0130506	-0.0246937	-0.00919815	-0.0160011	0	-0.0160011	-0.0207435	-0.0185017	0	-0.0207299	0.498371	-0.0207848	-0.0185017	-0.0228419	-0.0185017	0	0	-0.0160011	-0.0227661	0	-0.0130506	-0.0160011	-0.0327246	-0.0130293	-0.0130506	0	-0.0159836	-0.0246584	-0.0185017	-0.0247528	-0.0185017	-0.00919815	-0.0207299	0	0	-0.0247055	-0.0130293	-0.0159836	0.404919	0	-0.0246466	-0.0227913	-0.0227535	-0.0130506	-0.0207435	-0.0160011	0.404919	-0.0159836	-0.00919815
CYTARABINE	-0.0160272	-0.0303259	-0.0112961	-0.0196507	0	0.663755	-0.0254748	-0.0227216	0	-0.025458	-0.0160011	-0.0255254	-0.0227216	-0.0280517	-0.0227216	0	-0.0160011	0	-0.0279586	0	-0.0160272	0.663755	-0.0401886	-0.0160011	-0.0160272	0	-0.0196292	-0.0302825	-0.0227216	-0.0303985	0.280234	-0.0112961	-0.025458	0	0	-0.0303404	-0.0160011	0.320611	0.311887	0	0.200346	-0.0279895	-0.0279432	-0.0160272	-0.0254748	-0.0196507	-0.0196292	-0.0196292	-0.0112961
DABRAFENIB	-0.0228032	-0.0431471	-0.0160719	-0.0279586	0	-0.0279586	-0.0362451	-0.032328	0	0.341686	-0.0227661	-0.0363171	-0.032328	-0.0399115	-0.032328	0	-0.0227661	-0.0279586	0	0	-0.0228032	-0.0279586	-0.0571796	-0.0227661	-0.0228032	0	-0.0279281	-0.0430854	-0.032328	-0.0432505	-0.032328	-0.0160719	-0.0362212	0	0	-0.0431677	-0.0227661	-0.0279281	-0.0279281	0	-0.0430649	-0.039823	-0.039757	-0.0228032	-0.0362451	-0.0279586	-0.0279281	-0.0279281	-0.0160719
DASATINIB	0	0	0	0	0	0	0	0	0	0	0	0	0	0	0	0	0	0	0	0	0	0	0	0	0	0	0	0	0	0	0	0	0	0	0	0	0	0	0	0	0	0	0	0	0	0	0	0	0
DAUNORUBICIN	-0.0130719	-0.024734	-0.00921317	-0.0160272	0	-0.0160272	-0.0207774	-0.0185319	0	-0.0207637	-0.0130506	-0.0208187	-0.0185319	-0.0228792	-0.0185319	0	-0.0130506	-0.0160272	-0.0228032	0	0	-0.0160272	-0.0327781	-0.0130506	1	0	-0.0160097	-0.0246986	-0.0185319	-0.0247933	-0.0185319	-0.00921317	-0.0207637	0	0	-0.0247458	0.99837	-0.0160097	-0.0160097	0	-0.0246869	-0.0228285	-0.0227906	-0.0130719	-0.0207774	-0.0160272	-0.0160097	-0.0160097	-0.00921317
DECITABINE	-0.0160272	-0.0303259	-0.0112961	-0.0196507	0	1	-0.0254748	-0.0227216	0	-0.025458	-0.0160011	0.234834	-0.0227216	0.210388	-0.0227216	0	-0.0160011	0.663755	-0.0279586	0	-0.0160272	0	-0.0401886	-0.0160011	-0.0160272	0	0.316249	-0.0302825	-0.0227216	-0.0303985	0.280234	-0.0112961	-0.025458	0	0	-0.0303404	-0.0160011	0.652127	-0.0196292	0	0.417988	-0.0279895	-0.0279432	-0.0160272	-0.0254748	-0.0196507	-0.0196292	-0.0196292	-0.0112961
DEXAMETHASONE	-0.0327781	-0.062021	-0.0231022	-0.0401886	0	-0.0401886	-0.0520998	-0.0464692	0	0.0798337	-0.0327246	-0.0522034	-0.0464692	-0.0573701	-0.0464692	0	-0.0327246	-0.0401886	-0.0571796	0	-0.0327781	-0.0401886	0	-0.0327246	-0.0327781	0	-0.0401448	0.0501357	-0.0464692	0.401142	-0.0464692	-0.0231022	-0.0520654	0	0	-0.0620507	-0.0327246	-0.0401448	-0.0401448	0	0.0456902	-0.0572429	-0.057148	-0.0327781	-0.0520998	-0.0401886	-0.0401448	-0.0401448	0.283002
DOCETAXEL	-0.0130506	-0.0246937	-0.00919815	-0.0160011	0	-0.0160011	-0.0207435	-0.0185017	0	-0.0207299	-0.0130293	-0.0207848	-0.0185017	-0.0228419	-0.0185017	0	-0.0130293	-0.0160011	-0.0227661	0	-0.0130506	-0.0160011	-0.0327246	0	-0.0130506	0	-0.0159836	-0.0246584	-0.0185017	-0.0247528	-0.0185017	-0.00919815	-0.0207299	0	0	-0.0247055	-0.0130293	-0.0159836	-0.0159836	0	-0.0246466	-0.0227913	-0.0227535	-0.0130506	-0.0207435	-0.0160011	-0.0159836	-0.0159836	-0.00919815
DOXORUBICIN	-0.0130719	-0.024734	-0.00921317	-0.0160272	0	-0.0160272	-0.0207774	-0.0185319	0	-0.0207637	-0.0130506	-0.0208187	-0.0185319	-0.0228792	-0.0185319	0	-0.0130506	-0.0160272	-0.0228032	0	1	-0.0160272	-0.0327781	-0.0130506	0	0	-0.0160097	-0.0246986	-0.0185319	-0.0247933	-0.0185319	-0.00921317	-0.0207637	0	0	-0.0247458	0.99837	-0.0160097	-0.0160097	0	-0.0246869	-0.0228285	-0.0227906	-0.0130719	-0.0207774	-0.0160272	-0.0160097	-0.0160097	-0.00921317
ERLOTINIB	0	0	0	0	0	0	0	0	0	0	0	0	0	0	0	0	0	0	0	0	0	0	0	0	0	0	0	0	0	0	0	0	0	0	0	0	0	0	0	0	0	0	0	0	0	0	0	0	0
ETOPOSIDE	-0.0160097	-0.0302928	-0.0112838	-0.0196292	0	0.316249	-0.025447	-0.0226969	0	-0.0254302	-0.0159836	0.236278	-0.0226969	0.211716	-0.0226969	0	-0.0159836	-0.0196292	-0.0279281	0	-0.0160097	0.316249	-0.0401448	-0.0159836	-0.0160097	0	0	-0.0302495	-0.0226969	-0.0303654	-0.0226969	-0.0112838	-0.0254302	0	0	-0.0303073	-0.0159836	0.313725	-0.0196078	0	0.18861	-0.027959	-0.0279127	-0.0160097	-0.025447	-0.0196292	-0.0196078	-0.0196078	-0.0112838
EVEROLIMUS	0.254043	-0.0467335	-0.0174078	-0.0302825	0	-0.0302825	-0.0392578	-0.035015	0	0.141235	-0.0246584	-0.0393358	-0.035015	0.112189	-0.035015	0	-0.0246584	-0.0302825	-0.0430854	0	-0.0246986	-0.0302825	0.0501357	-0.0246584	-0.0246986	0	-0.0302495	0	-0.035015	-0.0468455	-0.035015	-0.0174078	-0.0392319	0	0	-0.0467558	-0.0246584	-0.0302495	-0.0302495	0	0.242742	0.112968	-0.0430616	0.254043	-0.0392578	-0.0302825	-0.0302495	-0.0302495	-0.0174078
FLUCONAZOLE	-0.0185319	-0.0350652	-0.0130614	-0.0227216	0	-0.0227216	-0.029456	-0.0262726	0	-0.0294365	-0.0185017	-0.0295145	-0.0262726	-0.0324357	0.482759	0	-0.0185017	-0.0227216	-0.032328	0	-0.0185319	-0.0227216	-0.0464692	-0.0185017	-0.0185319	0	-0.0226969	-0.035015	0	-0.0351492	-0.0262726	-0.0130614	-0.0294365	0	0	-0.0350819	-0.0185017	-0.0226969	-0.0226969	0	-0.0349984	-0.0323637	0.588313	-0.0185319	-0.029456	-0.0227216	-0.0226969	-0.0226969	-0.0130614
FLUOROMETHOLONE	-0.0247933	-0.0469125	-0.0174745	-0.0303985	0	-0.0303985	-0.0394082	-0.0351492	0	-0.0393822	-0.0247528	-0.0394865	-0.0351492	-0.0433946	-0.0351492	0	-0.0247528	-0.0303985	-0.0432505	0	-0.0247933	-0.0303985	0.401142	-0.0247528	-0.0247933	0	-0.0303654	-0.0468455	-0.0351492	0	-0.0351492	-0.0174745	-0.0393822	0	0	-0.046935	-0.0247528	-0.0303654	-0.0303654	0	-0.0468232	-0.0432984	-0.0432266	-0.0247933	-0.0394082	-0.0303985	-0.0303654	-0.0303654	0.366964
FLUOROURACIL	-0.0185319	-0.0350652	-0.0130614	-0.0227216	0	0.280234	-0.029456	-0.0262726	0	-0.0294365	-0.0185017	-0.0295145	-0.0262726	-0.0324357	-0.0262726	0	-0.0185017	0.280234	-0.032328	0	-0.0185319	0.280234	-0.0464692	-0.0185017	-0.0185319	0	-0.0226969	-0.035015	-0.0262726	-0.0351492	0	-0.0130614	-0.0294365	0	0	-0.0350819	-0.0185017	-0.0226969	-0.0226969	0	-0.0349984	-0.0323637	-0.0323101	-0.0185319	0.201773	-0.0227216	-0.0226969	-0.0226969	-0.0130614
FLUVASTATIN	-0.00921317	-0.0174327	-0.00649351	-0.0112961	0	-0.0112961	-0.0146441	-0.0130614	0	-0.0146344	-0.00919815	-0.0146732	-0.0130614	-0.0161254	-0.0130614	0	-0.00919815	-0.0112961	-0.0160719	0	-0.00921317	-0.0112961	-0.0231022	-0.00919815	-0.00921317	0	-0.0112838	-0.0174078	-0.0130614	-0.0174745	-0.0130614	0	-0.0146344	0	0	-0.017441	-0.00919815	-0.0112838	-0.0112838	0	-0.0173995	-0.0160897	-0.016063	-0.00921317	-0.0146441	0.576101	-0.0112838	-0.0112838	-0.00649351
FULVESTRANT	-0.0207637	-0.039288	-0.0146344	-0.025458	0	-0.025458	-0.0330033	-0.0294365	0	-0.0329815	-0.0207299	-0.0330689	-0.0294365	-0.0363418	-0.0294365	0	-0.0207299	-0.025458	-0.0362212	0	-0.0207637	-0.025458	-0.0520654	-0.0207299	-0.0207637	0	-0.0254302	-0.0392319	-0.0294365	-0.0393822	-0.0294365	-0.0146344	0	0	0	-0.0393068	-0.0207299	-0.0254302	-0.0254302	0	-0.0392132	-0.0362613	-0.0362012	-0.0207637	-0.0330033	-0.025458	-0.0254302	-0.0254302	-0.0146344
GEFITINIB	0	0	0	0	0	0	0	0	0	0	0	0	0	0	0	0	0	0	0	0	0	0	0	0	0	0	0	0	0	0	0	0	0	0	0	0	0	0	0	0	0	0	0	0	0	0	0	0	0
GEMCITABINE	0	0	0	0	0	0	0	0	0	0	0	0	0	0	0	0	0	0	0	0	0	0	0	0	0	0	0	0	0	0	0	0	0	0	0	0	0	0	0	0	0	0	0	0	0	0	0	0	0
IBRUTINIB	-0.0247458	-0.0468227	-0.017441	-0.0303404	0	-0.0303404	-0.0393327	0.161627	0	-0.0393068	-0.0247055	-0.0394109	-0.0350819	-0.0433115	-0.0350819	0	-0.0247055	-0.0303404	-0.0431677	0	-0.0247458	-0.0303404	-0.0620507	-0.0247055	-0.0247458	0	-0.0303073	-0.0467558	-0.0350819	-0.046935	-0.0350819	-0.017441	-0.0393068	0	0	0	-0.0247055	-0.0303073	-0.0303073	0	-0.0467336	-0.0432155	-0.0431439	-0.0247458	-0.0393327	-0.0303404	-0.0303073	-0.0303073	-0.017441
IDARUBICIN	-0.0130506	-0.0246937	-0.00919815	-0.0160011	0	-0.0160011	-0.0207435	-0.0185017	0	-0.0207299	-0.0130293	-0.0207848	-0.0185017	-0.0228419	-0.0185017	0	-0.0130293	-0.0160011	-0.0227661	0	0.99837	-0.0160011	-0.0327246	-0.0130293	0.99837	0	-0.0159836	-0.0246584	-0.0185017	-0.0247528	-0.0185017	-0.00919815	-0.0207299	0	0	-0.0247055	0	-0.0159836	-0.0159836	0	-0.0246466	-0.0227913	-0.0227535	-0.0130506	-0.0207435	-0.0160011	-0.0159836	-0.0159836	-0.00919815
IDOXURIDINE	-0.0160097	-0.0302928	-0.0112838	-0.0196292	0	0.652127	-0.025447	-0.0226969	0	-0.0254302	-0.0159836	0.494653	-0.0226969	0.448339	-0.0226969	0	-0.0159836	0.320611	-0.0279281	0	-0.0160097	0.652127	-0.0401448	-0.0159836	-0.0160097	0	0.313725	-0.0302495	-0.0226969	-0.0303654	-0.0226969	-0.0112838	-0.0254302	0	0	-0.0303073	-0.0159836	0	-0.0196078	0	0.421852	-0.027959	-0.0279127	-0.0160097	-0.025447	-0.0196292	-0.0196078	-0.0196078	-0.0112838
IFOSFAMIDE	-0.0160097	-0.0302928	-0.0112838	-0.0196292	0	-0.0196292	-0.025447	-0.0226969	0	-0.0254302	0.404919	-0.0254976	-0.0226969	-0.0280212	-0.0226969	0	0.404919	0.311887	-0.0279281	0	-0.0160097	-0.0196292	-0.0401448	-0.0159836	-0.0160097	0	-0.0196078	-0.0302495	-0.0226969	-0.0303654	-0.0226969	-0.0112838	-0.0254302	0	0	-0.0303073	-0.0159836	-0.0196078	0	0	-0.0302351	-0.027959	-0.0279127	-0.0160097	-0.025447	-0.0196292	0.326797	-0.0196078	-0.0112838
IMATINIB	0	0	0	0	0	0	0	0	0	0	0	0	0	0	0	0	0	0	0	0	0	0	0	0	0	0	0	0	0	0	0	0	0	0	0	0	0	0	0	0	0	0	0	0	0	0	0	0	0
IMIQUIMOD	-0.0246869	-0.0467112	-0.0173995	-0.0302681	0	0.417988	-0.0392391	-0.0349984	0	0.134445	-0.0246466	0.299933	-0.0349984	0.422825	-0.0349984	0	-0.0246466	0.200346	-0.0430649	0	-0.0246869	0.417988	0.0456902	-0.0246466	-0.0246869	0	0.18861	0.242742	-0.0349984	-0.0468232	-0.0349984	-0.0173995	-0.0392132	0	0	-0.0467336	-0.0246466	0.421852	-0.0302351	0	0	0.112914	-0.0430411	-0.0246869	-0.0392391	-0.0302681	-0.0302351	-0.0302351	-0.0173995
IRINOTECAN	0.281551	-0.0431949	-0.0160897	-0.0279895	0	-0.0279895	0.162074	-0.0323637	0	-0.0362613	-0.0227913	-0.0363573	-0.0323637	0.130966	-0.0323637	0	-0.0227913	-0.0279895	-0.039823	0	-0.0228285	-0.0279895	-0.0572429	-0.0227913	-0.0228285	0	-0.027959	0.112968	-0.0323637	-0.0432984	-0.0323637	-0.0160897	-0.0362613	0	0	-0.0432155	-0.0227913	-0.027959	-0.027959	0	0.112914	0	-0.039801	0.281551	-0.0362852	-0.0279895	-0.027959	-0.027959	-0.0160897
ITRACONAZOLE	-0.0227906	-0.0431233	-0.016063	-0.0279432	0	-0.0279432	-0.0362251	-0.0323101	0	-0.0362012	-0.0227535	-0.0362971	-0.0323101	-0.0398895	0.393106	0	-0.0227535	-0.0279432	-0.039757	0	-0.0227906	-0.0279432	-0.057148	-0.0227535	-0.0227906	0	-0.0279127	-0.0430616	0.588313	-0.0432266	-0.0323101	-0.016063	-0.0362012	0	0	-0.0431439	-0.0227535	-0.0279127	-0.0279127	0	-0.0430411	-0.039801	0	-0.0227906	-0.0362251	-0.0279432	-0.0279127	-0.0279127	-0.016063
LAPATINIB	1	-0.024734	-0.00921317	-0.0160272	0	-0.0160272	0.309583	-0.0185319	0	-0.0207637	-0.0130506	-0.0208187	-0.0185319	-0.0228792	-0.0185319	0	-0.0130506	-0.0160272	-0.0228032	0	-0.0130719	-0.0160272	-0.0327781	-0.0130506	-0.0130719	0	-0.0160097	0.254043	-0.0185319	-0.0247933	-0.0185319	-0.00921317	-0.0207637	0	0	-0.0247458	-0.0130506	-0.0160097	-0.0160097	0	-0.0246869	0.281551	-0.0227906	0	-0.0207774	-0.0160272	-0.0160097	-0.0160097	-0.00921317
LEFLUNOMIDE	-0.0207774	-0.039314	-0.0146441	-0.0254748	0	-0.0254748	0.166446	-0.029456	0	-0.0330033	-0.0207435	-0.0330907	-0.029456	-0.0363658	-0.029456	0	-0.0207435	-0.0254748	-0.0362451	0	-0.0207774	-0.0254748	-0.0520998	-0.0207435	-0.0207774	0	-0.025447	-0.0392578	-0.029456	-0.0394082	0.201773	-0.0146441	-0.0330033	0	0	-0.0393327	-0.0207435	-0.025447	-0.025447	0	-0.0392391	-0.0362852	-0.0362251	-0.0207774	0	-0.0254748	-0.025447	-0.025447	-0.0146441
LOVASTATIN	-0.0160272	-0.0303259	-0.0112961	-0.0196507	0	-0.0196507	-0.0254748	-0.0227216	0	-0.025458	-0.0160011	-0.0255254	-0.0227216	-0.0280517	-0.0227216	0	-0.0160011	-0.0196507	-0.0279586	0	-0.0160272	-0.0196507	-0.0401886	-0.0160011	-0.0160272	0	-0.0196292	-0.0302825	-0.0227216	-0.0303985	-0.0227216	0.576101	-0.025458	0	0	-0.0303404	-0.0160011	-0.0196292	-0.0196292	0	-0.0302681	-0.0279895	-0.0279432	-0.0160272	-0.0254748	0	-0.0196292	-0.0196292	-0.0112961
MELPHALAN	-0.0160097	-0.0302928	-0.0112838	-0.0196292	0	-0.0196292	-0.025447	-0.0226969	0	-0.0254302	0.404919	-0.0254976	-0.0226969	-0.0280212	-0.0226969	0	0.404919	-0.0196292	-0.0279281	0	-0.0160097	-0.0196292	-0.0401448	-0.0159836	-0.0160097	0	-0.0196078	-0.0302495	-0.0226969	-0.0303654	-0.0226969	-0.0112838	-0.0254302	0	0	-0.0303073	-0.0159836	-0.0196078	0.326797	0	-0.0302351	-0.027959	-0.0279127	-0.0160097	-0.025447	-0.0196292	0	-0.0196078	-0.0112838
METHOTREXATE	-0.0160097	-0.0302928	-0.0112838	0.311887	0	-0.0196292	-0.025447	-0.0226969	0	-0.0254302	-0.0159836	-0.0254976	-0.0226969	-0.0280212	-0.0226969	0	-0.0159836	-0.0196292	-0.0279281	0	-0.0160097	-0.0196292	-0.0401448	-0.0159836	-0.0160097	0	-0.0196078	-0.0302495	-0.0226969	-0.0303654	-0.0226969	-0.0112838	-0.0254302	0	0	-0.0303073	-0.0159836	-0.0196078	-0.0196078	0	-0.0302351	-0.027959	-0.0279127	-0.0160097	-0.025447	-0.0196292	-0.0196078	0	-0.0112838
METHYLPREDNISOLONE	-0.00921317	-0.0174327	-0.00649351	-0.0112961	0	-0.0112961	-0.0146441	-0.0130614	0	-0.0146344	-0.00919815	-0.0146732	-0.0130614	-0.0161254	-0.0130614	0	-0.00919815	-0.0112961	-0.0160719	0	-0.00921317	-0.0112961	0.283002	-0.00919815	-0.00921317	0	-0.0112838	-0.0174078	-0.0130614	0.366964	-0.0130614	-0.00649351	-0.0146344	0	0	-0.017441	-0.00919815	-0.0112838	-0.0112838	0	-0.0173995	-0.0160897	-0.016063	-0.00921317	-0.0146441	-0.0112961	-0.0112838	-0.0112838	0
MITOTANE	-0.02075	-0.0392621	-0.0146248	-0.0254412	0	-0.0254412	-0.0329816	-0.0294171	0	-0.0329598	-0.0207162	-0.0330471	-0.0294171	-0.0363179	-0.0294171	0	-0.0207162	-0.0254412	-0.0361973	0	-0.02075	-0.0254412	-0.0520311	-0.0207162	-0.02075	0	-0.0254135	-0.039206	-0.0294171	-0.0393562	-0.0294171	-0.0146248	-0.0329598	0	0	-0.0392809	-0.0207162	-0.0254135	-0.0254135	0	-0.0391873	-0.0362374	-0.0361773	-0.02075	-0.0329816	-0.0254412	-0.0254135	-0.0254135	-0.0146248
MITOXANTRONE	-0.02075	-0.0392621	-0.0146248	-0.0254412	0	-0.0254412	-0.0329816	-0.0294171	0	-0.0329598	-0.0207162	-0.0330471	-0.0294171	-0.0363179	-0.0294171	0	-0.0207162	-0.0254412	-0.0361973	0	0.309175	-0.0254412	-0.0520311	-0.0207162	0.309175	0	-0.0254135	-0.039206	-0.0294171	-0.0393562	-0.0294171	-0.0146248	-0.0329598	0	0	-0.0392809	0.310743	-0.0254135	-0.0254135	0	-0.0391873	-0.0362374	-0.0361773	-0.02075	-0.0329816	-0.0254412	-0.0254135	-0.0254135	-0.0146248
NELFINAVIR	-0.0160097	-0.0302928	-0.0112838	-0.0196292	0	-0.0196292	-0.025447	-0.0226969	0	-0.0254302	-0.0159836	-0.0254976	-0.0226969	-0.0280212	-0.0226969	0	-0.0159836	-0.0196292	-0.0279281	0	-0.0160097	-0.0196292	-0.0401448	-0.0159836	-0.0160097	0	-0.0196078	-0.0302495	-0.0226969	-0.0303654	-0.0226969	-0.0112838	-0.0254302	0	0	-0.0303073	-0.0159836	-0.0196078	-0.0196078	0	-0.0302351	-0.027959	-0.0279127	-0.0160097	-0.025447	-0.0196292	-0.0196078	-0.0196078	-0.0112838
NILOTINIB	0	0	0	0	0	0	0	0	0	0	0	0	0	0	0	0	0	0	0	0	0	0	0	0	0	0	0	0	0	0	0	0	0	0	0	0	0	0	0	0	0	0	0	0	0	0	0	0	0
OFLOXACIN	-0.00921317	-0.0174327	-0.00649351	-0.0112961	0	-0.0112961	-0.0146441	-0.0130614	0	-0.0146344	-0.00919815	-0.0146732	-0.0130614	-0.0161254	-0.0130614	0	-0.00919815	-0.0112961	-0.0160719	0	-0.00921317	-0.0112961	-0.0231022	-0.00919815	-0.00921317	0	-0.0112838	-0.0174078	-0.0130614	-0.0174745	-0.0130614	-0.00649351	-0.0146344	0	0	-0.017441	-0.00919815	-0.0112838	-0.0112838	0	-0.0173995	-0.0160897	-0.016063	-0.00921317	-0.0146441	-0.0112961	-0.0112838	-0.0112838	-0.00649351
OLAPARIB	-0.0246634	-0.0466669	-0.017383	-0.0302393	0	-0.0302393	-0.0392018	-0.0349651	0	-0.0391759	-0.0246232	-0.0392797	-0.0349651	-0.0431673	-0.0349651	0	-0.0246232	-0.0302393	-0.043024	0	-0.0246634	-0.0302393	-0.0618441	-0.0246232	-0.0246634	0	-0.0302064	-0.0466001	-0.0349651	-0.0467787	-0.0349651	-0.017383	-0.0391759	0	0	-0.0466892	-0.0246232	-0.0302064	-0.0302064	0	-0.046578	-0.0430716	-0.0430003	-0.0246634	0.132166	-0.0302393	-0.0302064	-0.0302064	-0.017383
PACLITAXEL	-0.0160272	-0.0303259	-0.0112961	-0.0196507	0	-0.0196507	-0.0254748	-0.0227216	0	-0.025458	-0.0160011	-0.0255254	-0.0227216	-0.0280517	-0.0227216	0	-0.0160011	-0.0196507	-0.0279586	0	-0.0160272	-0.0196507	-0.0401886	0.405361	-0.0160272	0	-0.0196292	-0.0302825	-0.0227216	-0.0303985	-0.0227216	-0.0112961	-0.025458	0	0	-0.0303404	-0.0160011	-0.0196292	-0.0196292	0	-0.0302681	0.450943	-0.0279432	-0.0160272	-0.0254748	-0.0196507	-0.0196292	-0.0196292	-0.0112961
PAZOPANIB	0	0	0	0	0	0	0	0	0	0	0	0	0	0	0	0	0	0	0	0	0	0	0	0	0	0	0	0	0	0	0	0	0	0	0	0	0	0	0	0	0	0	0	0	0	0	0	0	0
PEMETREXED	-0.0185167	-0.0350364	-0.0130507	0.262977	0	-0.022703	-0.0294318	-0.026251	0	-0.0294124	-0.0184866	-0.0294903	-0.026251	-0.0324091	-0.026251	0	-0.0184866	-0.022703	-0.0323015	0	-0.0185167	-0.022703	-0.0464311	-0.0184866	-0.0185167	0	-0.0226783	-0.0349863	-0.026251	-0.0351204	-0.026251	-0.0130507	-0.0294124	0	0	-0.0350532	-0.0184866	-0.0226783	-0.0226783	0	-0.0349697	-0.0323372	-0.0322836	-0.0185167	-0.0294318	-0.022703	-0.0226783	0.856105	-0.0130507
PONATINIB	0.536824	-0.046778	-0.0174244	-0.0303114	0	-0.0303114	0.313239	-0.0350484	0	-0.0392693	-0.0246819	-0.0393733	-0.0350484	0.119508	-0.0350484	0	-0.0246819	-0.0303114	-0.0431265	0	-0.0247222	-0.0303114	-0.0619914	-0.0246819	-0.0247222	0	-0.0302784	0.256435	-0.0350484	-0.0468901	-0.0350484	-0.0174244	-0.0392693	0	0	-0.0468004	-0.0246819	-0.0302784	-0.0302784	0	0.101953	0.288856	-0.0431027	0.536824	0.304257	-0.0303114	-0.0302784	-0.0302784	-0.0174244
RITONAVIR	0.489397	-0.0246937	-0.00919815	-0.0160011	0	-0.0160011	0.307004	-0.0185017	0	-0.0207299	-0.0130293	-0.0207848	-0.0185017	-0.0228419	-0.0185017	0	-0.0130293	-0.0160011	-0.0227661	0	-0.0130506	-0.0160011	-0.0327246	-0.0130293	-0.0130506	0	-0.0159836	-0.0246584	-0.0185017	-0.0247528	-0.0185017	-0.00919815	-0.0207299	0	0	-0.0247055	-0.0130293	-0.0159836	-0.0159836	0	-0.0246466	0.279193	-0.0227535	0.489397	-0.0207435	-0.0160011	-0.0159836	-0.0159836	-0.00919815
SIMVASTATIN	-0.0208187	0.662913	-0.0146732	-0.0255254	0	-0.0255254	-0.0330907	-0.0295145	0	-0.0330689	-0.0207848	-0.0331565	-0.0295145	-0.0364381	-0.0295145	0	-0.0207848	-0.0255254	-0.0363171	0	-0.0208187	-0.0255254	-0.0522034	-0.0207848	-0.0208187	0	-0.0254976	-0.0393358	-0.0295145	-0.0394865	-0.0295145	0.451934	-0.0330689	0	0	-0.0394109	-0.0207848	-0.0254976	-0.0254976	0	-0.0393171	-0.0363573	-0.0362971	-0.0208187	-0.0330907	0.246746	-0.0254976	-0.0254976	-0.0146732
SUNITINIB	-0.02075	-0.0392621	-0.0146248	-0.0254412	0	-0.0254412	-0.0329816	-0.0294171	0	-0.0329598	-0.0207162	-0.0330471	-0.0294171	-0.0363179	-0.0294171	0	-0.0207162	0.230667	-0.0361973	0	-0.02075	-0.0254412	-0.0520311	-0.0207162	-0.02075	0	-0.0254135	-0.039206	-0.0294171	-0.0393562	-0.0294171	-0.0146248	-0.0329598	0	0	-0.0392809	-0.0207162	-0.0254135	0.228721	0	-0.0391873	-0.0362374	-0.0361773	-0.02075	0.164908	-0.0254412	-0.0254135	-0.0254135	-0.0146248
TAMOXIFEN	-0.0297797	-0.0563477	-0.020989	-0.0365123	0	-0.0365123	-0.047334	-0.0422185	0	-0.0473028	-0.0297312	-0.0474281	-0.0422185	-0.0521222	-0.0422185	0	-0.0297312	0.157003	-0.0519491	0	-0.0297797	-0.0365123	-0.0746733	-0.0297312	-0.0297797	0	-0.0364726	-0.0562671	-0.0422185	-0.0564827	-0.0422185	-0.020989	-0.0473028	0	0	-0.0563746	-0.0297312	-0.0364726	0.155616	0	-0.0562403	-0.0520066	-0.0519204	-0.0297797	-0.047334	-0.0365123	-0.0364726	-0.0364726	-0.020989
TEMSIROLIMUS	0.307303	-0.039288	-0.0146344	-0.025458	0	-0.025458	-0.0330033	-0.0294365	0	-0.0329815	-0.0207299	-0.0330689	-0.0294365	-0.0363418	-0.0294365	0	-0.0207299	-0.025458	-0.0362212	0	-0.0207637	-0.025458	-0.0520654	-0.0207299	-0.0207637	0	-0.0254302	0.836199	-0.0294365	-0.0393822	-0.0294365	-0.0146344	-0.0329815	0	0	-0.0393068	-0.0207299	-0.0254302	-0.0254302	0	-0.0392132	-0.0362613	-0.0362012	0.307303	-0.0330033	-0.025458	-0.0254302	-0.0254302	-0.0146344
TENIPOSIDE	-0.0185167	-0.0350364	-0.0130507	-0.022703	0	0.270544	-0.0294318	-0.026251	0	-0.0294124	-0.0184866	0.19906	-0.026251	0.176899	-0.026251	0	-0.0184866	-0.022703	-0.0323015	0	-0.0185167	0.270544	-0.0464311	-0.0184866	-0.0185167	0	0.576406	-0.0349863	-0.026251	-0.0351204	-0.026251	-0.0130507	-0.0294124	0	0	-0.0350532	-0.0184866	0.26836	-0.0226783	0	0.156115	-0.0323372	-0.0322836	-0.0185167	-0.0294318	-0.022703	-0.0226783	-0.0226783	-0.0130507
TOPOTECAN	0.28124	0.114032	-0.0160719	-0.0279586	0	-0.0279586	0.161895	-0.032328	0	-0.0362212	-0.0227661	-0.0363171	-0.032328	-0.0399115	-0.032328	0	-0.0227661	-0.0279586	-0.039779	0	-0.0228032	-0.0279586	-0.0571796	-0.0227661	-0.0228032	0	-0.0279281	-0.0430854	-0.032328	-0.0432505	-0.032328	-0.0160719	-0.0362212	0	0	-0.0431677	-0.0227661	-0.0279281	-0.0279281	0	-0.0430649	0.142699	-0.039757	0.28124	-0.0362451	-0.0279586	-0.0279281	-0.0279281	-0.0160719
TRAMETINIB	0.635789	-0.039314	-0.0146441	-0.0254748	0	-0.0254748	0.380449	-0.029456	0	0.172937	-0.0207435	-0.0330907	-0.029456	-0.0363658	-0.029456	0	-0.0207435	-0.0254748	-0.0362451	0	-0.0207774	-0.0254748	-0.0520998	-0.0207435	-0.0207774	0	-0.025447	0.14245	-0.029456	-0.0394082	-0.029456	-0.0146441	-0.0330033	0	0	-0.0393327	-0.0207435	-0.025447	-0.025447	0	-0.0392391	0.159655	-0.0362251	0.635789	-0.0330251	-0.0254748	-0.025447	-0.025447	-0.0146441
TRIAMCINOLONE	-0.0344818	-0.0652447	-0.024303	-0.0422775	0	-0.0422775	-0.0548078	-0.0488846	0	-0.0547717	-0.0344256	-0.0549168	-0.0488846	0.0595783	-0.0488846	0	-0.0344256	-0.0422775	-0.0601516	0	-0.0344818	-0.0422775	0.685614	-0.0344256	-0.0344818	0	-0.0422314	0.0443889	-0.0488846	0.157394	-0.0488846	-0.024303	-0.0547717	0	0	-0.0652759	-0.0344256	-0.0422314	-0.0422314	0	0.0443678	0.0602182	-0.0601184	-0.0344818	-0.0548078	-0.0422775	-0.0422314	-0.0422314	0.267333
VEMURAFENIB	-0.0207637	-0.039288	-0.0146344	-0.025458	0	-0.025458	-0.0330033	0.195753	0	0.381266	-0.0207299	-0.0330689	-0.0294365	-0.0363418	-0.0294365	0	-0.0207299	-0.025458	-0.0362212	0	-0.0207637	-0.025458	0.0780982	-0.0207299	-0.0207637	0	-0.0254302	0.138993	-0.0294365	-0.0393822	-0.0294365	-0.0146344	-0.0329815	0	0	0.141504	-0.0207299	-0.0254302	-0.0254302	0	0.132204	-0.0362613	-0.0362012	-0.0207637	-0.0330033	-0.025458	-0.0254302	-0.0254302	-0.0146344
VINBLASTINE	-0.00921317	-0.0174327	-0.00649351	-0.0112961	0	-0.0112961	-0.0146441	-0.0130614	0	-0.0146344	-0.00919815	-0.0146732	-0.0130614	-0.0161254	-0.0130614	0	-0.00919815	-0.0112961	-0.0160719	0	-0.00921317	-0.0112961	-0.0231022	-0.00919815	-0.00921317	0	-0.0112838	-0.0174078	-0.0130614	-0.0174745	-0.0130614	-0.00649351	-0.0146344	0	0	-0.017441	-0.00919815	-0.0112838	-0.0112838	0	-0.0173995	-0.0160897	-0.016063	-0.00921317	-0.0146441	-0.0112961	-0.0112838	-0.0112838	-0.00649351
VINCRISTINE	-0.00921317	-0.0174327	-0.00649351	-0.0112961	0	-0.0112961	-0.0146441	-0.0130614	0	-0.0146344	-0.00919815	-0.0146732	-0.0130614	-0.0161254	-0.0130614	0	-0.00919815	-0.0112961	-0.0160719	0	-0.00921317	-0.0112961	-0.0231022	-0.00919815	-0.00921317	0	-0.0112838	-0.0174078	-0.0130614	-0.0174745	-0.0130614	-0.00649351	-0.0146344	0	0	-0.017441	-0.00919815	-0.0112838	-0.0112838	0	-0.0173995	-0.0160897	-0.016063	-0.00921317	-0.0146441	-0.0112961	-0.0112838	-0.0112838	-0.00649351
VORINOSTAT	-0.0185319	-0.0350652	-0.0130614	-0.0227216	0	-0.0227216	-0.029456	-0.0262726	0	-0.0294365	0.330718	-0.0295145	-0.0262726	-0.0324357	-0.0262726	0	-0.0185017	0.274553	-0.032328	0	-0.0185319	-0.0227216	-0.0464692	-0.0185017	-0.0185319	0	-0.0226969	-0.035015	-0.0262726	-0.0351492	-0.0262726	-0.0130614	-0.0294365	0	0	-0.0350819	-0.0185017	-0.0226969	0.272363	0	-0.0349984	-0.0323637	-0.0323101	-0.0185319	-0.029456	-0.0227216	-0.0226969	-0.0226969	-0.0130614
[truncated: 23 more columns]

## Sheet: C.Iskar
	CYTARABINE	ETHINYLESTRADIOL	NINTEDANIB	ITRACONAZOLE	DEXAMETHASONE	MIFEPRISTONE	NAVITOCLAX	PUROMYCIN	AZD1480	ARTEMETHER	ARTESUNATE	CELECOXIB	AZACITIDINE	FLUCONAZOLE	SU11274	FULVESTRANT	PRIMA1	DECITABINE	FLUVASTATIN	GOSSYPOL	METHOTREXATE	TRIAMCINOLONE	YOHIMBINE	AGK2	AXITINIB	BORTEZOMIB	SJ172550	GMX1778	LAPATINIB	NUTLIN3	RITONAVIR	SARACATINIB	SIROLIMUS	SRT1720	TANDUTINIB	TG100115	TW37	VER155008	ZSTK474	CHLORAMBUCIL	CLOTRIMAZOLE	CYCLOPHOSPHAMIDE	MITOTANE	OXIBENDAZOLE	CLADRIBINE	LOVASTATIN	FLUPHENAZINE	CLOFARABINE	TAMOXIFEN
CYTARABINE	1	0	0	0.0220283	0.000950556	0.0334496	0.0178411	0	0	0	-0.0347253	-0.0227571	0	0	0	0	0	0	0	0.0201264	0.0511186	0	0	0	0.0431279	0	-0.00791778	0	0	0.0148233	-0.0759661	0.00271464	0	-0.00483639	0.0257543	0	0.0188972	0	0.0274389	0.0674829	0	0	0	0	0.108925	0.288019	-0.0242564	0.100236	-0.00317472
ETHINYLESTRADIOL	0	1	0	0	0	0	0	0	0	0	0.0241203	0	0	0	-0.0221709	0	0	0	0	0	0	0	0	0.02232	0	-0.02211	0.0238078	0	0	0	0	0.0207525	0	0	0	-0.0208006	0	0	0	0	0	0	0	0	0	0.0198394	0	0	0
NINTEDANIB	0	0	1	0	0	0	0	0	0	0	0	0	0	0	0.0434387	0	0	0	0	0	0	0	0	0	0	0	-0.151685	0	0	0	0	0	0	0	0	0	0	0	-0.02432	0	0	0	0	0	0	0	0	0	0
ITRACONAZOLE	0.0220283	0	0	1	-0.00593985	0	-0.00906147	-0.0480461	0	0.0374414	0.0039757	0	0	-0.0197672	0	0	-0.0112097	0	0.0193683	-0.0227696	0	0	0	0.00530471	0	-0.0104044	0.00281466	-0.00248927	0	-0.0344357	0	0	-0.0225401	0.00045049	-0.0221911	0	-0.0164657	-0.00663314	0	0	0	0.0207328	0	0	0	-0.000362598	0.0174925	-0.0180924	0.00253642
DEXAMETHASONE	0.000950556	0	0	-0.00593985	1	0.00536266	0.00868397	-0.0539927	0	0.0160454	-0.0219898	-0.0224781	0	0	0.0288514	0.0148633	0.0231582	0	-0.0115502	-0.00658137	0	0.149494	-0.027958	-0.00773082	-0.0130313	-0.0257376	-0.000887255	-0.000913201	0.0271021	0.0075524	0	-0.0453891	-0.00494586	-0.00489794	0.013999	0.0261677	0.00470878	-0.00283598	0.00160107	0	0	-0.0164575	0	0.00576442	0	-0.00219392	0	-0.0124081	-0.010198
MIFEPRISTONE	0.0334496	0	0	0	0.00536266	1	-0.0338822	-0.0212029	0	0.0264211	-0.017215	-0.0124292	0	-0.0116048	0	0	0.0208767	-0.0112447	0.00675641	0	0	-0.0130815	-0.0218955	0	0.00722212	0	-0.00222583	-0.0369563	-0.0083625	-0.0198036	0.0228709	0	0.00976672	0.0190619	-0.0190656	0	0	0	0	0.00884769	0	0	-0.0119427	0	0	0	0	0	0
NAVITOCLAX	0.0178411	0	0	-0.00906147	0.00868397	-0.0338822	1	-0.185602	0	-0.0297804	-0.025864	0.0206117	-0.0265913	0.0185614	0	0.0490111	0.0180019	0	-0.0191456	-0.00104882	0	0.0186314	0	-0.0176654	0	-0.0608931	0.00561382	0.00202578	0.017065	0.0132956	0	0	0.00197936	-0.0107083	0	0.0214211	-0.00135699	-0.0234686	0	0	0	0.0213047	0	0	0	-0.0204925	0	-0.0401625	-0.0235875
PUROMYCIN	0	0	0	-0.0480461	-0.0539927	-0.0212029	-0.185602	1	0	-0.0184779	0	-0.0104639	0.0946125	-0.0393033	-0.0262311	-0.0432913	-0.0443978	-0.0147577	0	0	0	-0.00818096	-0.0238788	-0.0518545	-0.0118127	0.257846	-0.144756	-0.0586919	-0.133969	-0.0741269	0.0374153	0.00548	-0.00933089	-0.107994	0.00439846	-0.0483031	0	0	-0.0392218	0.0161175	0.0238696	0.0177128	-0.0451294	-0.000890385	0.0248481	0	-0.0722029	-0.0231171	-0.0651498
AZD1480	0	0	0	0	0	0	0	0	1	0	0	0	0	0	-0.0235083	0	0	0	0	-0.143685	0	0	0	0	0	0	0	0	0.00916875	0	0	0	0	0	0	0	0	0	-0.0295679	0	0	0	0	0	0	0	0	0	0
ARTEMETHER	0	0	0	0.0374414	0.0160454	0.0264211	-0.0297804	-0.0184779	0	1	-0.02481	0.0263714	0	-0.0191646	-0.0230757	0.0475654	-0.0285454	-0.0251929	-0.00555714	-0.0161939	0.0237157	0.0135571	0	0	0	0.0471939	-0.0163129	0.0280461	-0.0224536	0.0232068	-0.0112921	0	0.0243282	-0.0295264	0	0.0252239	0.0285793	0	-0.0420771	0	0	-0.0296079	0	0.0310036	0	0	0.0256689	0	0
ARTESUNATE	-0.0347253	0.0241203	0	0.0039757	-0.0219898	-0.017215	-0.025864	0	0	-0.02481	1	-0.0158675	0.0251156	-0.0183053	0.0523372	0	-0.00690625	0	-0.0395531	-0.00651155	-0.0758832	0	-0.0184925	-0.0201036	0	-0.0141796	-0.0408133	-0.0128513	0.0614558	-0.0171985	-0.0267244	-0.0474589	-0.00109915	-0.0234702	-0.0154606	0	-0.0107168	-0.0206271	0	-0.0196206	0.0389425	0	0	0	0	-0.00908595	0	0	-0.0205378
CELECOXIB	-0.0227571	0	0	0	-0.0224781	-0.0124292	0.0206117	-0.0104639	0	0.0263714	-0.0158675	1	-0.0190278	-0.01928	-0.00901	0.000350385	0	-0.0495457	0	0	-0.0459936	0.025535	0	0	-0.0132919	-0.0483256	0.0221031	-0.019115	0.0141321	0.00465056	0	-0.0106696	0.00946906	0	0	0	0	-0.0141561	-0.0279866	0	0	0	0	0	0.0208539	-0.000297031	0.0145519	-0.0128196	0
AZACITIDINE	0	0	0	0	0	0	-0.0265913	0.0946125	0	0	0.0251156	-0.0190278	1	-0.035155	-0.0193069	0	-0.0269203	-0.0182425	0	0.0426019	-0.0188057	0	0.0205075	0	-0.0150581	0.0295659	-0.0188175	0	-0.0126291	0.00436531	0	0	0	-0.0191228	-0.0267266	0	0.04382	0	0	0	0	0	0.0199434	-0.0110434	0.0339806	0	-0.0434978	0.0212366	-0.0386213
FLUCONAZOLE	0	0	0	-0.0197672	0	-0.0116048	0.0185614	-0.0393033	0	-0.0191646	-0.0183053	-0.01928	-0.035155	1	0	0	0	0.0477206	-0.0127206	0	0	0	0	0	-0.0182217	-0.0173561	0	0	0	-0.0332344	0	0	-0.0271781	0	0	0	-0.0161592	0	-0.0110183	-0.0136515	0.0254911	0	-0.0142704	-0.0131587	0	0.0269856	-0.00817981	-0.0147335	-0.023136
SU11274	0	-0.0221709	0.0434387	0	0.0288514	0	0	-0.0262311	-0.0235083	-0.0230757	0.0523372	-0.00901	-0.0193069	0	1	0.0337125	0	0	-0.0125696	0	-0.0316118	0	-0.00990125	0	-0.0130096	-0.0434508	0.0117031	0	0.0114867	0	-0.0173353	-0.0186467	0.00963908	-0.0136042	0	-0.0163815	0	0	-0.0364366	0	0	0	0.0133873	0	0.00978167	0.0113159	0	0	0
FULVESTRANT	0	0	0	0	0.0148633	0	0.0490111	-0.0432913	0	0.0475654	0	0.000350385	0	0	0.0337125	1	0.0319819	0.0114131	0	-0.00474194	0.0270664	0	-0.0112815	0.0319383	0.0166115	-0.0947897	0.0110203	0.0532506	0.0137685	0.0559153	0	0.0123865	-0.0166483	-0.0165253	0.0131175	0.0145992	0	-0.0124403	0	-0.0118573	0.0234371	0	0	-0.0133654	0	-0.0131725	0.0139113	0	0.0359388
PRIMA1	0	0	0	-0.0112097	0.0231582	0.0208767	0.0180019	-0.0443978	0	-0.0285454	-0.00690625	0	-0.0269203	0	0	0.0319819	1	0	0	0.00368917	-0.0191004	0	0	-0.0129214	-0.01341	-0.0364517	-0.00502088	0.00427505	0.0199775	0.0205204	0	0	0.00920382	-0.00559887	0.0158758	0	-0.00373929	-0.0165316	-0.0183892	0	0	0	0	0	-0.03752	-0.0111853	0.0237325	0	-0.012215
DECITABINE	0	0	0	0	0	-0.0112447	0	-0.0147577	0	-0.0251929	0	-0.0495457	-0.0182425	0.0477206	0	0.0114131	0	1	-0.0109148	0	-0.0167039	0	0.00984673	0	-0.044584	0	0	0.0152489	0	-0.0288025	-0.0212397	0	-0.00137	0.0209306	0.0130848	-0.0152092	0	0	0	0	0	-0.0190606	-0.0454169	0	0	-0.0190212	0	0	-0.0199272
FLUVASTATIN	0	0	0	0.0193683	-0.0115502	0.00675641	-0.0191456	0	0	-0.00555714	-0.0395531	0	0	-0.0127206	-0.0125696	0	0	-0.0109148	1	0	0	0	0	0	-0.0419598	0.0196814	-0.0473622	0	-0.0443882	-0.0159303	0	0.024973	0.0103702	-0.0214089	-0.0149046	-0.00996692	0	0.0175281	0.00406107	0.0147098	0	0.0367659	-0.0147623	-0.0281888	0	0.0796839	-0.0205604	0	-0.0198241
GOSSYPOL	0.0201264	0	0	-0.0227696	-0.00658137	0	-0.00104882	0	-0.143685	-0.0161939	-0.00651155	0	0.0426019	0	0	-0.00474194	0.00368917	0	0	1	0	0.0206189	0	-0.0173641	-0.0179028	-0.0109569	-0.0207115	-0.0210887	-0.0344508	-0.00395103	-0.0327084	0	0.00807206	-0.0118009	0	0	0.0177636	-0.018703	0	0	0	0	0	-0.03907	0	-0.00781593	-0.0237139	0.0357033	-0.0206069
METHOTREXATE	0.0511186	0	0	0	0	0	0	0	0	0.0237157	-0.0758832	-0.0459936	-0.0188057	0	-0.0316118	0.0270664	-0.0191004	-0.0167039	0	0	1	-0.0264939	-0.0198139	0	0.0424861	0	-0.0892921	0	-0.0277364	-0.0239636	0	0.0203625	0.0223186	0	-0.021115	0	0	0	0.05363	-0.0270443	-0.0437857	0.0262561	0	-0.0631596	0.0653186	0.0187261	-0.0514854	0.0288129	-0.0176489
TRIAMCINOLONE	0	0	0	0	0.149494	-0.0130815	0.0186314	-0.00818096	0	0.0135571	0	0.025535	0	0	0	0	0	0	0	0.0206189	-0.0264939	1	0	0	0	0	0	0.01314	0	0	0.0189972	-0.0151887	0	0	-0.00907125	0.00344292	0	0	-0.0143417	-0.0130563	0	0.0171097	-0.0123025	-0.0106644	0	-0.0137625	0	-0.0139283	0
YOHIMBINE	0	0	0	0	-0.027958	-0.0218955	0	-0.0238788	0	0	-0.0184925	0	0.0205075	0	-0.00990125	-0.0112815	0	0.00984673	0	0	-0.0198139	0	1	0	0.0129304	-0.0376319	0	0	0	0	0	0	0.00876911	0.0213975	-0.0128025	0	-0.0183111	0	0	0	0	0	-0.00988712	0	-0.0331003	0	0.0112035	-0.0244737	0
AGK2	0	0.02232	0	0.00530471	-0.00773082	0	-0.0176654	-0.0518545	0	0	-0.0201036	0	0	0	0	0.0319383	-0.0129214	0	0	-0.0173641	0	0	0	1	0	-0.00779922	-0.00335157	-0.00522814	0.0165302	-0.0319272	0	0	-0.0155473	0.000584951	0	0	-0.0197862	0.0164691	0	0	0	0.0156962	0	0	0	-0.0138777	0	0	0.00408514
AXITINIB	0.0431279	0	0	0	-0.0130313	0.00722212	0	-0.0118127	0	0	0	-0.0132919	-0.0150581	-0.0182217	-0.0130096	0.0166115	-0.01341	-0.044584	-0.0419598	-0.0179028	0.0424861	0	0.0129304	0	1	-0.0202142	0.0187239	0	0.01866	0.0165258	-0.02319	-0.0197652	0	0	0.00299827	-0.0142956	0	-0.0404994	0.0364177	0	-0.0249757	0	0	0.019981	-0.0187956	-0.0126415	0.013554	0.0217829	0.0117781
BORTEZOMIB	0	-0.02211	0	-0.0104044	-0.0257376	0	-0.0608931	0.257846	0	0.0471939	-0.0141796	-0.0483256	0.0295659	-0.0173561	-0.0434508	-0.0947897	-0.0364517	0	0.0196814	-0.0109569	0	0	-0.0376319	-0.00779922	-0.0202142	1	-0.0522895	-0.0206443	-0.12052	-0.0268844	0.0205675	0	0.00155907	-0.0422758	-0.0261492	-0.0495575	-0.0120323	-0.00442358	0	0	-0.0225043	0.000354687	-0.0394747	-0.04555	-0.0198928	0.00198789	-0.0951669	0.0214972	-0.0090251
SJ172550	-0.00791778	0.0238078	-0.151685	0.00281466	-0.000887255	-0.00222583	0.00561382	-0.144756	0	-0.0163129	-0.0408133	0.0221031	-0.0188175	0	0.0117031	0.0110203	-0.00502088	0	-0.0473622	-0.0207115	-0.0892921	0	0	-0.00335157	0.0187239	-0.0522895	1	0.00410716	0.0826061	-0.0062876	0	-0.0198436	-0.022259	-0.00222132	0	0.0221106	-0.0162062	-0.00207922	-0.0773686	0	0	-0.0457703	0	0.0296842	-0.0235086	-0.0238498	0.0315114	-0.0952369	-0.000459559
GMX1778	0	0	0	-0.00248927	-0.000913201	-0.0369563	0.00202578	-0.0586919	0	0.0280461	-0.0128513	-0.019115	0	0	0	0.0532506	0.00427505	0.0152489	0	-0.0210887	0	0.01314	0	-0.00522814	0	-0.0206443	0.00410716	1	0.0422919	0.000166863	-0.0216203	0	-0.0143508	-0.00941294	0	0.0249003	0.000476429	-0.00754505	-0.018235	0	0	0	0	0	0	-0.00617397	0	-0.0184694	0.00499686
LAPATINIB	0	0	0	0	0.0271021	-0.0083625	0.017065	-0.133969	0.00916875	-0.0224536	0.0614558	0.0141321	-0.0126291	0	0.0114867	0.0137685	0.0199775	0	-0.0443882	-0.0344508	-0.0277364	0	0	0.0165302	0.01866	-0.12052	0.0826061	0.0422919	1	0.0537711	-0.0256513	-0.0119976	0.0141309	0	-0.0238794	0.0179631	0.0110222	-0.035935	-0.0069454	0	0.02526	-0.0595031	0	0.0207929	-0.0594664	-0.00227696	0.0139279	-0.0240907	0.0222555
NUTLIN3	0.0148233	0	0	-0.0344357	0.0075524	-0.0198036	0.0132956	-0.0741269	0	0.0232068	-0.0171985	0.00465056	0.00436531	-0.0332344	0	0.0559153	0.0205204	-0.0288025	-0.0159303	-0.00395103	-0.0239636	0	0	-0.0319272	0.0165258	-0.0268844	-0.0062876	0.000166863	0.0537711	1	0	0	0.00632417	-0.0297195	0	0.00306778	0.00650347	-0.0333984	0	0	0.0274261	0	0.0177244	0.0209222	0.0333461	-0.00628873	0.0237397	-0.0230267	-0.0427446
RITONAVIR	-0.0759661	0	0	0	0	0.0228709	0	0.0374153	0	-0.0112921	-0.0267244	0	0	0	-0.0173353	0	0	-0.0212397	0	-0.0327084	0	0.0189972	0	0	-0.02319	0.0205675	0	-0.0216203	-0.0256513	0	1	0	0.0347275	-0.0268369	0	0	0	0	0	-0.0180906	-0.0445904	0	-0.0636128	-0.0178456	0	0	0	-0.0195325	0
SARACATINIB	0.00271464	0.0207525	0	0	-0.0453891	0	0	0.00548	0	0	-0.0474589	-0.0106696	0	0	-0.0186467	0.0123865	0	0	0.024973	0	0.0203625	-0.0151887	0	0	-0.0197652	0	-0.0198436	0	-0.0119976	0	0	1	-0.00339658	-0.0190764	0.0335017	-0.0193665	0	0.0440064	0.0224091	0	0	0.0197775	-0.0358581	0.00912269	0	0.0553534	0.0101617	0	0
SIROLIMUS	0	0	0	-0.0225401	-0.00494586	0.00976672	0.00197936	-0.00933089	0	0.0243282	-0.00109915	0.00946906	0	-0.0271781	0.00963908	-0.0166483	0.00920382	-0.00137	0.0103702	0.00807206	0.0223186	0	0.00876911	-0.0155473	0	0.00155907	-0.022259	-0.0143508	0.0141309	0.00632417	0.0347275	-0.00339658	1	-0.02218	0	0.00496962	-0.00522592	-0.000693529	0.126049	0	0.0173564	0	0.00752385	0	0	-0.00086375	0.00613231	0.0137562	-0.0137904
SRT1720	-0.00483639	0	0	0.00045049	-0.00489794	0.0190619	-0.0107083	-0.107994	0	-0.0295264	-0.0234702	0	-0.0191228	0	-0.0136042	-0.0165253	-0.00559887	0.0209306	-0.0214089	-0.0118009	0	0	0.0213975	0.000584951	0	-0.0422758	-0.00222132	-0.00941294	0	-0.0297195	-0.0268369	-0.0190764	-0.02218	1	0	0	-0.0130161	0.0107893	-0.0389756	0	0	0	-0.0172228	0	0	0.00187446	0.00289917	-0.0197414	0.000866078
TANDUTINIB	0.0257543	0	0	-0.0221911	0.013999	-0.0190656	0	0.00439846	0	0	-0.0154606	0	-0.0267266	0	0	0.0131175	0.0158758	0.0130848	-0.0149046	0	-0.021115	-0.00907125	-0.0128025	0	0.00299827	-0.0261492	0	0	-0.0238794	0	0	0.0335017	0	0	1	-0.0119396	-0.0123164	0.0176631	0.0131594	-0.0139594	0	0.0409803	-0.0323881	-0.017855	-0.0203808	0	0	0.00105865	0
TG100115	0	-0.0208006	0	0	0.0261677	0	0.0214211	-0.0483031	0	0.0252239	0	0	0	0	-0.0163815	0.0145992	0	-0.0152092	-0.00996692	0	0	0.00344292	0	0	-0.0142956	-0.0495575	0.0221106	0.0249003	0.0179631	0.00306778	0	-0.0193665	0.00496962	0	-0.0119396	1	-0.0274783	-0.0204892	0.000539615	0	0	-0.0427969	0.0150571	0.0166235	-0.0177858	-0.0103769	0	-0.025681	0.0142002
TW37	0.0188972	0	0	-0.0164657	0.00470878	0	-0.00135699	0	0	0.0285793	-0.0107168	0	0.04382	-0.0161592	0	0	-0.00373929	0	0	0.0177636	0	0	-0.0183111	-0.0197862	0	-0.0120323	-0.0162062	0.000476429	0.0110222	0.00650347	0	0	-0.00522592	-0.0130161	-0.0123164	-0.0274783	1	-0.00603949	0	0.0205367	0.00851	0	0	-0.0130364	0.0620008	-0.00880699	0	0.0666556	-0.0214109
VER155008	0	0	0	-0.00663314	-0.00283598	0	-0.0234686	0	0	0	-0.0206271	-0.0141561	0	0	0	-0.0124403	-0.0165316	0	0.0175281	-0.018703	0	0	0	0.0164691	-0.0404994	-0.00442358	-0.00207922	-0.00754505	-0.035935	-0.0333984	0	0.0440064	-0.000693529	0.0107893	0.0176631	-0.0204892	-0.00603949	1	0	0	0	0.0210559	0	-0.014282	0	-0.00557515	0	0	0
ZSTK474	0.0274389	0	-0.02432	0	0.00160107	0	0	-0.0392218	-0.0295679	-0.0420771	0	-0.0279866	0	-0.0110183	-0.0364366	0	-0.0183892	0	0.00406107	0	0.05363	-0.0143417	0	0	0.0364177	0	-0.0773686	-0.018235	-0.0069454	0	0	0.0224091	0.126049	-0.0389756	0.0131594	0.000539615	0	0	1	0	-0.0213482	0	0.0106487	-0.00492308	0	-0.00914054	0	0.0131765	-0.00842161
CHLORAMBUCIL	0.0674829	0	0	0	0	0.00884769	0	0.0161175	0	0	-0.0196206	0	0	-0.0136515	0	-0.0118573	0	0	0.0147098	0	-0.0270443	-0.0130563	0	0	0	0	0	0	0	0	-0.0180906	0	0	0	-0.0139594	0	0.0205367	0	0	1	0	0	-0.0139673	-0.0126569	0.0369875	0	0	0	0
CLOTRIMAZOLE	0	0	0	0	0	0	0	0.0238696	0	0	0.0389425	0	0	0.0254911	0	0.0234371	0	0	0	0	-0.0437857	0	0	0	-0.0249757	-0.0225043	0	0	0.02526	0.0274261	-0.0445904	0	0.0173564	0	0	0	0.00851	0	-0.0213482	0	1	0	0	0	0	0	0.0296946	-0.0242	0
CYCLOPHOSPHAMIDE	0	0	0	0.0207328	-0.0164575	0	0.0213047	0.0177128	0	-0.0296079	0	0	0	0	0	0	0	-0.0190606	0.0367659	0	0.0262561	0.0171097	0	0.0156962	0	0.000354687	-0.0457703	0	-0.0595031	0	0	0.0197775	0	0	0.0409803	-0.0427969	0	0.0210559	0	0	0	1	-0.0633903	-0.105685	0	-0.0222253	0	0.0428819	0
MITOTANE	0	0	0	0	0	-0.0119427	0	-0.0451294	0	0	0	0	0.0199434	-0.0142704	0.0133873	0	0	-0.0454169	-0.0147623	0	0	-0.0123025	-0.00988712	0	0	-0.0394747	0	0	0	0.0177244	-0.0636128	-0.0358581	0.00752385	-0.0172228	-0.0323881	0.0150571	0	0	0.0106487	-0.0139673	0	-0.0633903	1	0.0154402	0	-0.012434	-0.0117496	-0.0139446	0
OXIBENDAZOLE	0	0	0	0	0.00576442	0	0	-0.000890385	0	0.0310036	0	0	-0.0110434	-0.0131587	0	-0.0133654	0	0	-0.0281888	-0.03907	-0.0631596	-0.0106644	0	0	0.019981	-0.04555	0.0296842	0	0.0207929	0.0209222	-0.0178456	0.00912269	0	0	-0.017855	0.0166235	-0.0130364	-0.014282	-0.00492308	-0.0126569	0	-0.105685	0.0154402	1	0	0	-0.0139475	-0.0322177	0
CLADRIBINE	0.108925	0	0	0	0	0	0	0.0248481	0	0	0	0.0208539	0.0339806	0	0.00978167	0	-0.03752	0	0	0	0.0653186	0	-0.0331003	0	-0.0187956	-0.0198928	-0.0235086	0	-0.0594664	0.0333461	0	0	0	0	-0.0203808	-0.0177858	0.0620008	0	0	0.0369875	0	0	0	0	1	0	0.0107428	0.199387	-0.0153461
LOVASTATIN	0.288019	0.0198394	0	-0.000362598	-0.00219392	0	-0.0204925	0	0	0	-0.00908595	-0.000297031	0	0.0269856	0.0113159	-0.0131725	-0.0111853	-0.0190212	0.0796839	-0.00781593	0.0187261	-0.0137625	0	-0.0138777	-0.0126415	0.00198789	-0.0238498	-0.00617397	-0.00227696	-0.00628873	0	0.0553534	-0.00086375	0.00187446	0	-0.0103769	-0.00880699	-0.00557515	-0.00914054	0	0	-0.0222253	-0.012434	0	0	1	0.00862038	-0.0280983	0.00188267
FLUPHENAZINE	-0.0242564	0	0	0.0174925	0	0	0	-0.0722029	0	0.0256689	0	0.0145519	-0.0434978	-0.00817981	0	0.0139113	0.0237325	0	-0.0205604	-0.0237139	-0.0514854	0	0.0112035	0	0.013554	-0.0951669	0.0315114	0	0.0139279	0.0237397	0	0.0101617	0.00613231	0.00289917	0	0	0	0	0	0	0.0296946	0	-0.0117496	-0.0139475	0.0107428	0.00862038	1	-0.0304527	0.00810308
CLOFARABINE	0.100236	0	0	-0.0180924	-0.0124081	0	-0.0401625	-0.0231171	0	0	0	-0.0128196	0.0212366	-0.0147335	0	0	0	0	0	0.0357033	0.0288129	-0.0139283	-0.0244737	0	0.0217829	0.0214972	-0.0952369	-0.0184694	-0.0240907	-0.0230267	-0.0195325	0	0.0137562	-0.0197414	0.00105865	-0.025681	0.0666556	0	0.0131765	0	-0.0242	0.0428819	-0.0139446	-0.0322177	0.199387	-0.0280983	-0.0304527	1	-0.0133006
TAMOXIFEN	-0.00317472	0	0	0.00253642	-0.010198	0	-0.0235875	-0.0651498	0	0	-0.0205378	0	-0.0386213	-0.023136	0	0.0359388	-0.012215	-0.0199272	-0.0198241	-0.0206069	-0.0176489	0	0	0.00408514	0.0117781	-0.0090251	-0.000459559	0.00499686	0.0222555	-0.0427446	0	0	-0.0137904	0.000866078	0	0.0142002	-0.0214109	0	-0.00842161	0	0	0	0	0	-0.0153461	0.00188267	0.00810308	-0.0133006	1
SIMVASTATIN	0.0120444	0	0	-0.00933446	-0.00173099	0	0.000431176	-0.0133161	0	-0.0270668	-0.00911085	0	0	0	0	0	0.0186926	0	0.0617666	0.00361235	0	-0.00875192	0	-0.0177044	-0.0129923	-0.0136101	-0.0172578	-0.00704382	-0.0257714	-0.00643681	0	0.0308262	0.00905685	-0.012112	0.0163042	-0.0144285	-0.00713464	-0.00508137	-0.0110273	0	0	0.0190869	-0.0140937	-0.0561067	-0.0164258	0.0210242	0.0152373	-0.043955	-0.00979733
PROGESTERONE	-0.0195075	0	0	0.0213706	0.0138545	0.0351287	0	-0.0177894	0	0	0	-0.0458642	0	-0.0132785	0	0.0190592	0	-0.00986383	0	0	0	0	-0.0149962	0	-0.0135538	0	-0.0337639	0	-0.0218942	0	0	-0.04732	0.00247933	-0.0187628	0	0	0.0182064	0	-0.0362131	0	0	0	0	-0.0123644	0	-0.010313	-0.0135815	0	0
KI8751	0	-0.0164659	0	-0.0343382	0	0	0	0.0401058	0	0.0148636	0.0180814	-0.0174958	0	0	0	0.0169368	-0.0493553	0.00661306	0	0.0316797	0.0481657	0	0	-0.0436867	0.0188872	0.0927558	-0.0619847	-0.0405383	0	0.0704281	0	-0.0179153	-0.00706175	-0.0196789	-0.0196514	0	0.0195119	-0.0164089	0.0126847	0	0	0.0166506	-0.015314	0.00122475	0	0	0.0162582	-0.0208042	-0.0407267
PLX4720	0	0	-0.13	-0.0206433	0.0334555	-0.00809286	0.0174464	-0.0108413	0	-0.0262157	0.0283689	0	0	-0.0121342	-0.00129895	0.00902481	0.00306972	0	-0.0403314	-0.00384889	-0.0486336	-0.0136775	0	0	0	-0.0608519	-0.0350497	-0.0221372	0.0492855	0.0200203	0.0202678	0.00324724	0.000394605	0	0	-0.0222354	-0.0154619	0	-0.0449453	0	0	0.0205606	-0.0252213	-0.0248983	0	-0.0155857	-0.0108017	0.023555	0
VEMURAFENIB	-0.0186531	0	0	-0.0162527	-0.010674	0	0.0095185	0	0.0352675	-0.0190514	-0.0077642	-0.00874464	0	0	-0.00363474	0	0.00991725	0	0	-0.00031605	0.0313664	0	0	-0.0154429	0.0123185	-0.0108705	-0.00610275	-0.0036976	0	0.0166079	0	0	-0.00841083	-0.00028065	-0.0133877	0	0.00250821	0.0005978	-0.00884671	-0.0103031	-0.0432657	0.0526316	-0.0203842	-0.0205192	0	0.000662182	0	0.0134123	-0.00904364
WZ4002	0	0	-0.02789	0	0.010965	0	0	-0.0320579	0	0.0176996	-0.0149317	0	-0.0491888	0	-0.00961987	0.0411719	0.0431475	-0.0255569	0	-0.0386628	-0.0270039	0.0005475	0	0.0137616	0	-0.07165	-0.00318917	0.0197694	0.0630237	0.0136219	0.0201528	0.0181938	-0.0112712	0	0.0281798	-0.0252388	-0.0327464	0	-0.00999868	0.0242865	0.0536404	0	-0.0138646	0.00559942	-0.0138847	0.0122141	0.0504265	-0.0103763	-0.00865304
BRIVANIB	0	-0.0217175	0	0	-0.024155	-0.0216446	-0.0153231	-0.0141732	0.0530983	0	0	-0.0105823	0	0	-0.0210812	0.0136848	0	0	0	0.000700833	0.00773607	0	0.0112286	0	-0.0229938	-0.0335583	0	0	0.0083146	-0.0491139	0	-0.00857421	-0.0151107	0	0.0228837	0	-0.0168142	0	0.0114289	0	0	0.0158247	-0.0303888	-0.0136869	0	-0.00803071	0	0.0158627	-0.0122818
ETOPOSIDE	0.0327968	-0.0194316	0	-0.0207791	-0.0255515	0	-0.0720203	0.045158	0	0	-0.0215406	-0.0248683	0.0524825	-0.0457664	-0.0258908	-0.00101306	-0.112311	-0.00103063	0.016335	0	0.201441	-0.0172947	-0.012081	-0.0587263	0.027132	0.0495303	-0.179385	-0.0748859	-0.100063	0.0940669	0.0193228	-0.00868075	0.0102419	-0.0742369	-0.0212892	0	0.0517269	-0.0224378	0.0162983	0.0867408	-0.0458589	-0.0256825	0.00768667	-0.0393147	0.148131	-0.0287633	-0.0258764	0.194823	-0.0677144
FLUOROMETHOLONE	0	0	0	0	0.183045	0	-0.0195991	0	0	0	0.0301244	0	0	-0.0180203	0	-0.0193244	0	0	0	0	-0.0186964	0.0852666	0	0	0.0220741	-0.0257491	0	0	0.03395	0	-0.0189303	0	0	-0.0171153	0	-0.0148781	-0.0193316	0	0	-0.0200622	0	0.0182006	0	-0.0414603	0	0	0	0.0237206	0
THALIDOMIDE	0.0129147	0	0	-0.00874387	0.0170112	0	-0.0153525	-0.0242568	0	0.0199354	-0.00567205	-0.0162236	-0.0352091	0.0287581	0	0.0256283	0.00780858	0.0131617	0	-0.0025476	-0.0491618	0.059404	-0.00878839	-0.0115919	0	-0.0467452	-0.00778358	-0.0177408	0.0374732	-0.0178106	0	-0.0288095	-0.00548323	-0.00619343	0	0	-0.0150979	-0.0234538	0	0	0	0	-0.014085	-0.0115856	0	0.000917759	0.0137842	0	-0.0126206
AM580	0	0.0243819	0	-0.00775539	-0.00624069	0	-0.0113936	-0.0274764	-0.11198	-0.0285393	-0.0079825	0	0	0	-0.00854857	-0.0129429	-0.00657872	0	0	-0.0133343	0.0669941	-0.0135706	0	-0.00477618	0	-0.0241424	-0.0122788	-0.0122285	-0.0134786	-0.00330152	0.0236559	-0.00934071	-0.00738009	-0.00666333	0	0	-0.0153473	-0.00361618	0	0	0	0.0151512	0	-0.01288	-0.0182975	-0.0101803	-0.015111	0	-0.00931013
LINSITINIB	-0.0157069	0.0156778	-0.0251767	-0.00295598	-0.00842407	0	-0.00862235	-0.0383194	-0.0755875	-0.0263575	-0.0163738	0	0	0	-0.0631314	0	-0.0126254	-0.0172936	-0.00862806	-0.0186711	0	0	0	-0.0107057	0	-0.0288326	0.015953	0.00396637	-0.00247054	-0.0291242	0	-0.011857	-0.00935192	0.00810152	0	0	-0.0184584	0.00104235	0.0885002	0	-0.0263429	0	0	-0.0203592	0	-0.00869608	0	0	-0.0063951
KU0060648	-0.0173242	-0.0193519	0	-0.0238044	-0.016441	0	-0.0300418	0	0	0	-0.0213589	-0.0344544	-0.0168622	0.0130533	-0.0257842	-0.0222108	-0.0300271	-0.0382578	0.036635	-0.0215781	0.0683632	0	0	-0.0227164	-0.00134361	-0.00412395	-0.0927215	-0.0226006	-0.105629	-0.0128679	0.0362225	0.0165181	0.0139118	-0.0519415	0.0321131	-0.0722861	0.00440333	-0.00091465	0.0473067	0	-0.0197643	0.04243	-0.0735319	-0.0431853	0	-0.0078428	-0.0486594	0	-0.0105863
GEMCITABINE	0.106038	0	0	0.00233123	-0.00143074	-0.0147283	-0.00167549	0	0	0	-0.0227521	0	0.0210281	-0.0124917	0	0.000493611	-0.0114791	0.0192736	0	0.004915	0.0637032	-0.0203	-0.0181097	-0.0136127	0	-0.00820975	0.00184598	0.010979	-0.0176411	0.00480828	0	0	-0.00328696	-0.0218053	0	-0.0149567	0.0405867	-0.00353328	0	0.0259961	0	0	0	-0.0167403	0.179749	-0.0102297	0	0.0766264	-0.0175109
HLI373	0.0222817	0	0	-0.0113915	0.000587843	0	-0.000629216	-0.0223875	0	-0.0163593	-0.0093624	0	-0.0285681	0	0	0	-0.00405721	0	0	-0.0114641	0	0	0	0.0171263	0	-0.00474721	0.00280667	0.0136125	0	-0.0172014	0	0	-0.00438353	0.000648333	0	0	0.00410199	0.0101162	0	0	0	-0.0152719	0	0	0	-0.0107723	0	0	0.00679838
PROCHLORPERAZINE	0.0257114	0	0	0	-0.0451844	0	0	0	0	0	0	-0.00439942	0	-0.0124446	0	0	0	-0.0129929	0	0	-0.0196636	0	0	-0.00520925	0	0	-0.0590436	0	0	0	-0.0375478	0.0229831	0	-0.0191175	0.0254519	-0.0132215	0	0.0143483	-0.00979269	-0.0124977	0	0.02339	0	-0.000699615	0	0.0152821	0.0602163	-0.014075	0
ERISMODEGIB	0	0	0	-0.0277849	-0.00280113	-0.0149667	-0.0143875	-0.0723386	0	0	-0.0162921	0	-0.0399987	0	-0.0419064	0.0353281	-0.0297235	-0.0178328	0	-0.0191559	-0.0337907	0	0	0.000711569	0	0.01057	-0.0210834	-0.00583618	-0.0334631	-0.0103963	0	0.0474169	0.00180495	-0.0179871	0	-0.0170967	-0.0160967	-0.00317637	0	0	0	0.0154175	-0.045365	0	-0.0363131	0.0126997	0	-0.0224689	-0.00491868
MST312	0	0	0	-0.0104723	-0.00281616	0	0.00514331	0	0	0.0185632	-0.00887936	0	0	0	-0.0165	0	0	-0.0174861	0	0.00944023	0.0302204	0	0	-0.0130081	-0.0123675	-0.00348331	0	0.00157593	-0.0149636	0	0	0	0	-0.00201395	0	-0.01485	0.0644456	-0.00404924	0	0	0	0	0.0132022	0	0.0177536	-0.00957081	0	0.0155964	0.00156901
CD437	0	-0.0327203	0	-0.0175423	-0.0265062	0	-0.0227624	0.144299	0	0	-0.00926075	-0.0154067	0.0836588	-0.0169014	-0.0385131	-0.0128186	-0.0264526	0	0	-0.00761809	0.06423	0	-0.0154233	-0.0110001	-0.0320081	0.0236221	-0.0159363	-0.00712358	-0.0721658	0.00936833	0	0.017525	-0.0172444	-0.0176249	0	-0.0227836	0.015662	-0.00688216	0	0	-0.00121964	0.00521125	-0.0288464	-0.0253522	0.161221	-0.020874	0	0.182509	-0.00269471
PRIMA1MET	-0.0145289	0	0	-0.00827878	-0.0126799	0	-0.0172499	-0.0201072	0	0	-0.0155154	0	0	0	0.0185728	0	-0.0131005	0	0	-0.0154376	-0.0304186	0	0	0.006115	0	-0.0177782	-0.000781127	-0.00883843	0	-0.0340199	0	0	-0.018096	0.00567162	0	0	-0.0191902	0.0113018	0	0	0	0	-0.000871111	0	-0.0494717	-0.0132337	0	0	-0.004285
PEMETREXED	0	0	0	-0.0029918	-0.00472795	-0.0192014	-0.003238	-0.0954369	0	-0.00145429	6.52e-05	0	0	-0.0124267	0	0.0200642	0.01005	0	-0.0209589	-0.00377335	0	0	0	-0.0151383	-0.0211961	-0.0303298	-0.0049039	-0.00773695	0.0246067	0.00075055	0	0.0222106	-0.0073988	-0.0156019	0	0	-0.00881908	-0.0264655	0	0	0	0	0	0.0227511	0	-0.00729405	0	-0.0174697	-0.0207771
ACETYLCYSTEINE	0	-0.0388638	0	0	0	0	0	-0.115212	0	0	-0.0139688	0	-0.0912731	0.0360556	0.06187	0	0.0463675	0	-0.0839162	0	-0.108705	0	0	0	0	-0.198529	0	0.0355619	-0.0357544	0	0	-0.0650619	-0.042115	0	0	-0.0308975	0	0	-0.07822	0	0.0561808	-0.0343006	0	0	0.0271356	0	0	0	0
TIPIFARNIBP2	-0.0238289	0	0.214655	-0.00325088	-0.0142162	-0.0157681	-0.0146879	-0.0162986	0	0	-0.0194492	0	0	0	0	0.0152597	-0.0233205	0	0	-0.0300617	0	0	0	0.00227348	0	-0.0143478	-0.0111404	-9.21e-05	0.0548692	-0.00867314	0.021185	-0.0222472	-0.00878348	0.00135363	0	0	-0.00399291	0.0054176	0	-0.0167967	0	0	0.0181267	0.0193792	-0.0191142	-0.00029799	0	0	-0.00517676
KU0063794	0	0	0	-0.0115685	0.0178704	-0.00961278	0.0256978	0	-0.127323	0	0.00508365	0	-0.0155778	0	0	0	0.0125927	0	0	-0.00353539	0	0	0	-0.0155771	0	-0.00979789	-0.013585	0	0.0139236	0.00997353	0	0	0.0545197	-0.0135391	0	0	0.00333235	-0.00130064	0.223662	0.0182164	0	0	0	0.0166364	0	-0.0210331	0.0178306	0	-0.00463
GDC0879	0	-0.0156694	0	0	-0.0107688	-0.014912	0	0.0468925	0	0	0	0.000319286	-0.0162841	0	-4.39e-05	0.010649	-0.0384789	0	0	0.0197928	0	0	-0.0104857	0	-0.00838365	-0.00318972	0	0	0.000750789	-0.0171161	0	0	0.00973145	-0.0190128	0	-0.00883769	0.0168906	0.022005	-0.00843592	0	0	0	0	0	0	0	0	0	-0.0222688
UNC0321	0.0136633	0	0	-0.00230652	-0.00328279	-0.0162994	-0.0165044	-0.0350883	0	-0.0205654	0.0006578	-0.0151881	0	0	0	0	-0.000912794	0	0	-0.00700034	-0.0253021	0.0203042	0	-0.00846245	0	-0.0240399	-0.0190671	-0.00326868	0	-0.00506456	0	0	-0.0098425	-0.0331622	0	0	-0.0075001	-0.0114133	0	0	0	0	0	0	-0.0257439	-0.000348922	0.02054	-0.0443669	-0.0081125
HOMOHARRINGTONINE	0.0473057	0	0	-0.0635583	-0.0459273	0.0136869	-0.0131289	0.0722944	0	0.0257446	-0.0159089	-0.00567979	0.131884	0	-0.02369	0	-0.0375824	0.0200168	0.0120356	0.0201622	0.00781821	0	0.0119269	0	-0.0231714	0.0154514	-0.0449336	-0.0714936	-0.0301619	0.01038	-0.0183437	0	0	-0.00721917	0.0277132	-0.00735818	0.0163619	0	-0.00493812	0	0.0204375	0.00694594	-0.0356187	-0.00697979	0.0115206	-0.0218727	-0.0143898	0.113368	-0.0814996
EX527	-0.0154967	0	0	-0.0146494	0	0	0.00174034	-0.0337916	0	-0.0326025	-0.0149062	-0.0126363	-0.0240559	-0.0150315	0	0.018099	-0.0043325	0	0	-0.00551142	0	0	0	-0.0130081	0	-0.0234621	0.0021802	-0.00975858	0.00905432	-0.0147397	0	0	-0.00248023	-0.0165675	0	0	-0.00867944	-0.0106244	0	0	0	0	0	-0.0162275	0	-0.00441918	0	-0.0134275	-0.00704091
VORINOSTAT	-0.0129642	0	0	-0.0195657	-0.0195352	0	-0.00347505	0.00469864	0	0	-0.00803215	0.0300294	0	-0.0524973	-0.013183	-0.142311	-0.0171191	-0.056385	0	-0.0068099	0	-0.0126215	-0.0297305	-0.0125555	-0.00868386	-0.00222299	-0.0215679	-0.0126198	-0.0664259	-0.0332966	-0.0176841	0	0.00326457	-0.0340903	-0.0259827	-0.0748009	-0.012347	-0.0112706	0	0	0	0.0220122	-0.032968	0	0	-0.0122088	-0.0521407	0	-0.0155965
PF750	-0.0256206	0	0	-0.0102248	-0.00419015	0	-0.0100824	0	0	-0.0179575	0.002011	0	0	-0.0182786	0	0.0210222	-0.0214673	-0.0158869	0.0381133	-0.0119114	0.02003	0	0	-0.0108865	0	-0.0210947	-0.00749573	-0.00387887	-0.0148444	-0.00301074	0	0	0.00636515	-0.0114562	0	0	-0.00400633	-0.0242148	0	0	0.0228546	0	0.0197483	0	0	-0.0069724	0.027635	0	-0.035648
CAY10618	-0.0133497	0	0	-0.000170196	-0.00210721	0.0185664	-0.0244512	-0.0133842	0	0	-0.0088121	0	0.0165306	0	0	0.0301897	-0.0162348	0	0.0173083	0.00658397	0.0175996	-0.0159403	0	-0.0141638	0.0143825	-0.00860951	-0.0124897	-0.00360971	-0.0343239	-0.0210892	0.0199484	-0.0172126	0.00186716	-0.0147524	0	0	-0.00115388	-0.00716946	0	0	0	0.0217678	0	-0.0184808	0	-0.00581529	-0.0196083	-0.0211383	-0.0232797
VELIPARIB	0	0	-0.0296238	-0.0065025	-0.0162622	0	-0.0175159	-0.0527839	-0.0372	-0.00907857	0.00477545	0	-0.0181772	0.0390608	-0.0481738	-0.0178811	-0.0319941	-0.00510778	-0.0169511	-0.00818343	0	0	0	0.00806039	-0.0167356	-0.0140765	-0.019441	-0.00379495	0.0462714	-0.0178416	0	-0.0103991	-0.00472554	-0.00689284	0	-0.0349156	-0.0247011	0	0.0117486	0.0178131	0	0.0142153	0	0	-0.0148214	0.00248887	-0.0207211	-0.018035	-0.0042601
ALVOCIDIB	0	0.0422981	0.0355308	0	-0.0603157	0.0201195	-0.0129744	0.0870996	0.0156642	0.050585	-0.0546089	0.0105477	-0.00582563	0.0218062	-0.159401	0.00222019	-0.0555083	0.0384617	0.0660304	0.0195292	0.120106	0.0170435	0	0	0.0283098	0.0961111	-0.0674522	-0.0556958	-0.0773382	-0.0227681	-0.0282678	0.0844699	0.04586	-0.0134681	0.023291	-0.0618187	0.0168158	0.039345	0.0826796	0.00312923	0.01934	0.106895	-0.0376483	0.00338	0	0.0108104	-0.04955	0	-0.0263391
RG108	-0.0200372	0	0	0.00542858	-0.0120446	0	-0.0225671	-0.0493064	0	0	0.0077476	0	-0.062335	0	0	0	-0.0181957	0.0191594	0	-0.0355175	0.00737036	0	0	0.00560828	0	-0.00352137	-0.00408309	0.00933922	-0.0160053	-0.0238403	0	0	-0.0112425	-0.0035448	0	0	-0.0235481	0.0116824	0.0456192	-0.0175244	0	-0.0166072	0	0.0162853	-0.0083875	0.0128091	0	-0.0163758	-0.00430294
TRIFLUOPERAZINE	-0.0392333	-0.0449256	0	0	-0.00308377	-0.0121917	0.00948044	-0.0623377	0	0.0203121	-0.0328567	0	-0.0151156	-0.0548737	-0.0357932	0.026028	-0.00475951	-0.0338902	0.0153294	-0.0180622	0.0254589	0.0159815	0	-0.00479114	0.03934	-0.0124765	0.00481784	0.000500882	-0.00793909	-0.00352417	0.0139856	0.0581209	-0.0135783	-0.0241278	0	0	0.00287495	-0.0083227	0	-0.0339023	-0.0234736	0	-0.0328035	-0.050927	0	-0.00638018	0.0987097	-0.0216539	0.0121089
DOXORUBICIN	0.0984021	0.0367388	0	0	-0.0966546	-0.0171221	-0.0391767	0.0733281	0	-0.0325879	-0.0209058	-0.0123125	0.0231937	0.01421	-0.0421373	-0.0515644	-0.0754756	0.0152286	0.0796523	0.0433008	0.02991	0.0122873	0.0152613	0	0.01016	0.0726933	-0.0842144	-0.0415867	-0.113773	0.00260278	0.0153103	0.057721	0.0648121	0	0.0225661	-0.101316	0.0245811	0.0337714	0.0386552	0.0552777	0.0449696	0.0348772	-0.0221575	-0.0345329	0.00333833	0.02993	-0.034439	0.018757	-0.0757629
AC55649	0.0220881	0.0200712	0	-0.00156382	0	0.00432194	-0.000913873	-0.0950792	0	0.0302482	-0.0142082	0	0	0	0	0.0244978	0.00940431	0	-0.0214647	-0.00390946	-0.0274632	0	0	-0.00741976	0.0162817	-0.0317762	-0.00735814	-0.00671088	0.0212547	-0.00875216	-0.01893	-0.013645	-0.00934113	-0.00839951	0	0	-0.0176542	-0.0161305	0.0028175	0	0	0	0	0.0474114	0	-0.00373603	0.0197647	-0.0263425	-0.0132069
PACLITAXEL	0.244307	0.0168575	0	0	0.0381485	0	0.0202075	-0.0130025	0	0	0	-0.0147933	0	-0.0166087	0	0	0.0366668	-0.0427237	0.0149562	0	0.0225432	0	-0.00339423	0	0.0504196	-0.0339548	0.0337375	0.0304718	-0.0113419	0.0323295	0	0.0294635	-0.009359	0.0153339	-0.00925854	0.016461	0	0.0129259	0	-0.000819423	0	-0.0305106	-0.0122215	0.0640883	0	0.186287	-0.0136277	0	0.0282548
CAMPTOTHECIN	0	0.038395	0	0	-0.0589781	0	-0.0483356	0.0152615	0	-0.0683261	-0.078975	-0.0742558	0.00542656	-0.0188307	-0.0180104	-0.0487195	-0.0987422	0.0226402	0	0.0358408	0.0824721	-0.014423	0.0144458	-0.0300145	0.017111	0	-0.144067	-0.0379192	-0.116331	-0.0698419	-0.00275625	0	0.0317348	0	-0.0114062	-0.0680342	0.0261181	0.0171325	0.0126598	0.0109484	-0.0389725	0.068105	-0.0436648	-0.0375191	0.0427497	0	-0.06376	0.0519154	-0.0732698
IBRUTINIB	0	0.146987	0.0354758	0	0	0	0	0	0	0.151872	0	0	0	0	-0.142245	0.16807	0	0	0	0	0.177795	0	0	0	0	0	-0.180088	0	-0.0374725	0	0	0	-0.0187579	-0.30431	0	0.165772	0	0.15769	0.0325071	0	0	0	0	0	0	0	0	0	0
OUABAIN	0	0	0	-0.0208094	-0.0835516	-0.0202718	-0.0144789	0.0668384	0	0.00329786	-0.0336236	-0.023683	0.0665519	-0.0385713	-0.0573707	-0.0233596	-0.0974253	-0.0133479	-0.00781071	0.0369689	0.0214593	-0.0397206	0.0144736	-0.0140436	0.016934	0.0256492	-0.143313	-0.039075	-0.135386	-0.0809617	-0.0154313	0.00996464	0.0123966	-0.0398656	0.0263054	-0.0508833	0.0218575	0	0	0.000114808	-0.0223539	0.0277297	0.0109823	-0.00382635	0	-0.0235359	-0.0336785	0.0835269	-0.0359905
TEMSIROLIMUS	0	0	0	-0.0080627	-0.0241313	0	-0.0496249	0	0	0	0.0115359	0	0	0	0.0167289	0	-0.0211706	0	0.00507167	-0.0185278	0.0263121	0	0	0.00790078	0	-0.00412441	-0.0364987	-0.0198875	0	-0.012272	-0.0167544	-0.0163856	0.0350156	-0.00950642	-0.0163158	0.0143153	-0.00313985	0.0120794	0.0216478	0	0	0.0392875	-0.0150283	-0.00550472	-0.0202092	0.00281029	0	0	-0.0071124
APICIDIN	0	0	0	0	-0.0332925	0	0	0	0	0	0	-0.04435	0	-0.118368	0	0	0	-0.0934887	0	0	0	-0.12819	0	0	0	0	0	0	-0.0647888	0	0	0	0	0	-0.0703875	-0.06666	0	0	0	0	0	0	0	0	0	0.0375887	0	0	0
VINCRISTINE	0	0	0	0	0.000476786	-0.0168188	-0.0176917	-0.0103213	0	0.0259636	-0.0206178	-0.0102532	0.0279559	-0.049399	-0.0265068	-0.0270796	-0.0373033	-0.0456896	-0.0115811	0	0	-0.0250723	0	-0.0147025	0.0157165	0	-0.0793544	-0.0359292	-0.0498346	-0.0163969	0.01798	0	0	-0.0368817	0	-0.0266912	0.0187069	-0.0190036	0	0	0	-0.0171481	0.0311438	0.0792762	0	-0.0245618	-0.0126883	0.00590596	-0.010442
MANUMYCINA	0	0	0	-0.0335547	-0.0207144	0	-0.0306785	0.148413	0	-0.0137704	-0.0344591	-0.01407	0.0520359	-0.0368964	-0.0436597	-0.0737456	-0.030512	-0.0139594	0	-0.0129848	0.01612	-0.0186956	-0.0570819	-0.0296381	-0.00508222	0.0659232	-0.0777437	-0.0260118	-0.144034	-0.0483387	0	-0.000105278	-0.00476473	-0.0576197	-0.0340364	-0.0532358	-0.00534383	-0.0105845	0	0.0385411	0	0	0.0157831	0	0.0229683	-0.0280964	-0.104174	0	-0.0285725
CLIOQUINOL	0	0	0	0	0	0	0	0	0	0	0.0186238	0	0.0180909	0	0	0.0177466	0	0	0	0	-0.0302261	0	0	0	-0.0195731	-0.0164488	0.0218303	0	0	0	0	0	0	0	0	0	-0.0396712	0	0	-0.0157259	0	-0.0160569	0	0	-0.0153434	0	0	0	0
TRAMETINIB	0	0	0	0	0	0	0	0	-0.0282058	0	0	0	0	0	0.0481275	0	0	0	0	0	0	0	0	0	0	0	0	0	-0.0189746	0	0	0	0	0	0	0	0	0	0.0293213	0	0	0	0	0	0	0	0	0	0
CICLOPIROX	0.195288	0	0	0	-0.106209	0	-0.0777488	0	0	0	0	0	0	-0.0677935	0	0	-0.0890875	0	0	0.08982	0	-0.0807825	-0.123967	-0.109018	0	0	0	0	0	0	-0.05036	-0.0698175	0	0	0	-0.182103	0.278535	-0.18153	0	0	0	0	0	0	0.191155	0	0	0.254667	0
MELPHALAN	0	0	0	0	0	0	0	0	0	0	0	0	0	-0.157392	0	0	0	0	0	0	0	0	0	0	-0.353388	0	0	0	0	0	0	0	0	0	0	0	0	0	0	0.17409	0	0	0	0	0	0	0	0	0.195277
TENIPOSIDE	0.115122	-0.0400178	0	-0.00572951	-0.0150424	0.00900396	-0.0373848	0.00822146	0	-0.047075	0.00266605	-0.0262119	0.0334184	-0.0738369	-0.0242442	-0.0569104	-0.0386948	-0.0197365	0	-0.000774314	0.0976943	-0.0441042	-0.0171446	-0.0246438	0.0318862	0.00913167	-0.0530877	-0.0281706	-0.121269	0.00748637	0.0010575	-0.0134223	-0.00425009	-0.0318532	-0.0128577	-0.0397367	0.00210112	-0.0217529	0	0.0333667	0	-0.0106509	0	-0.00995437	0.199752	-0.0165625	-0.0856433	0.191415	-0.0297668
SN38	0.0566008	0	0	0.00350127	-0.00421338	0	-0.0341763	0.0258589	0	0	-0.00900565	0	0.0357897	-0.0160872	0	-0.0543133	-0.0342549	0	0	-0.0136126	0.115368	0	0.00278389	-0.00954	0.0155844	0.00334103	-0.0395947	-0.0153014	-0.0979836	-0.0149717	0	0	-0.0118605	-0.0132966	0	-0.0607164	-0.00941357	0.00531338	0	0.0402211	0	0.0257259	-0.0282667	-0.03578	0.110067	-0.00589495	-0.0847158	0.146833	-0.0153063
TGX221	0	0	0	0	0.0124793	0	0	-0.0145671	0	0	0	0	0	0	0	0	0.0153747	0.0111177	0.0103489	0	0	-0.0115862	-0.0309484	0	-0.0104046	-0.00169722	0	0	-0.00843816	-0.0295444	0	-0.00726803	0.0231938	0	0	-0.0222185	0	-0.0160525	0.0090604	0	0	0	0	0	0	0.0170716	0	-0.00455461	-0.00986804
VINBLASTINE	0	0	0	0.0142003	-0.0664911	0	0	0.0128702	0	0.0224193	0	-0.0167005	0.0471031	-0.0377462	-0.00942946	-0.0381063	-0.0284211	-0.0315267	0	0.0189614	0	-0.0342031	0	-0.0145875	0.0145254	0	-0.0817181	-0.0361192	-0.0428491	-0.0415269	0.0209066	0.000797857	-0.0243025	0	0.0232667	0	0.0387472	0	0.0107598	0	0	-0.0217022	0.0752979	0.0801806	0.0407958	-0.0230845	-0.0105302	0.00999769	-0.00912679
AFATINIB	0	0	0	0	-0.0515525	0	-0.0203369	0.0141406	-0.0751629	0	0	-0.0143823	0.009735	0	-0.0894754	-0.0274566	-0.0376503	-0.0299642	0.0121204	0	0.020285	0.00327636	0.00150333	-0.0193395	0.0145406	-0.0105681	-0.0682889	0	0.0130121	-0.0117542	-0.0193	0.0363087	-0.00135353	-0.0404983	-0.0188081	0	0.0180944	0	0.0198054	0.0159048	0	0	-0.0147743	0.0184707	-0.015895	0.0137169	0	0.0132919	0
SALERMIDE	0	-0.0158963	0	-0.0089616	-0.0357026	0	-0.0650636	0.0893859	0	-0.0406679	-0.0108798	-0.0378419	0.0856322	-0.041717	0	-0.074043	-0.0622124	0.0178098	0.01226	-0.00939995	0	0	-0.0111148	-0.00710667	-0.031645	0.00931277	-0.0602799	-0.0353319	-0.154904	-0.0738005	-0.000691875	0	0.00375284	-0.0210108	0.0177045	-0.0679252	0.0104282	-0.00281364	0	0	-0.0175554	0.0259875	-0.0305855	-0.0459953	-0.0165342	-0.00302907	-0.0628617	0	-0.00662358
DAUNORUBICIN	0.213854	0.0343744	0	0	-0.0967812	0.0163264	-0.014513	0.0848221	0	0.0310371	-0.0256291	-0.00945964	0.0281772	-0.00797942	-0.0627795	0.00445192	-0.0322952	0.00292808	0.0603693	0.0122189	0.0920579	-0.00635769	0.0418732	-0.0204688	0.0150552	0.0986218	-0.0561116	-0.0316948	-0.0893871	-0.00944386	0.0195097	0.106501	0.0586756	0.0136032	0.0228452	-0.0602112	0.0174748	0.0327045	0.0750959	0.0486229	0	0.141331	-0.0130154	-0.0118646	0.0355714	0.0819826	-0.0299438	0.0582423	-0.0169487
IDARUBICIN	0	0.000529688	0	-0.0151266	-0.0108316	0	-0.0111919	0.0796667	0	0	-0.0200993	-0.0142144	0.0266088	-0.0503594	-0.0266697	0.00705056	-0.0280641	0.0379144	0.00480667	0.00037951	0.0941675	0	0	0.00162275	-0.0436131	0.00497941	-0.0169557	-0.0012899	-0.1131	0.005905	0.00209906	0.0223258	-0.00773912	-0.0164087	0.0193836	-0.0396072	0.0301348	-0.00391941	0.0436622	0.0607844	0	0.0399281	0	-0.0534147	0.0430733	-0.0075548	-0.0393378	0.071705	-0.0259635
KU60019	0	0	0	0	0	0	0	0	-0.0684888	-0.142522	0	0	0	0	0.147177	-0.15967	0	0	0	0	-0.253843	0	0	0	0	-0.14655	0	0	0.02763	0	0	0	0	0	0	-0.138283	0	0	-0.0264979	0	0	0	0	0	0	-0.151175	0	0	0
DIGOXIN	0	0	0	-0.0359586	-0.0767685	-0.030851	0	0.0706567	0	0.0490964	-0.0355133	-0.00274308	0.0795709	-0.037339	-0.0412165	-0.00700461	-0.054045	-0.0258298	-0.0132146	0.0188067	0	-0.0460335	0.0251144	-0.0181613	0.0334467	0.0181131	-0.0766497	0	-0.0903696	0.0351592	0	0	0.0251654	-0.0345056	0.0144163	-0.0609931	0.0157511	0	-0.00928365	2.77e-05	0	0	0.000579231	0	0.0162708	-0.0177321	-0.012849	0.0633433	-0.0580446
RITA	-0.0337892	0.0124369	0	0	-0.0087627	0.0222819	-0.0183543	-0.09138	0	0.0223357	-0.0180239	0.0217114	0	0	0	0.0266578	-0.00222735	-0.0109706	0	-0.0237938	-0.0181789	0	0.0161058	-0.0056613	0	-0.0212362	0.0055697	-0.0025072	0.0167578	-0.0233576	0	0	-0.0193618	0.00445295	0	0.0168086	0.00119917	-0.00339965	0	0.0170567	0.0256082	0	0	0	-0.0312192	-0.0161145	0	-0.0246356	-0.0029923
TUBASTATINA	0	0	0	0	0	0	-0.0204361	0	0	-0.0453586	0	0	-0.00374125	0.00945861	0	-0.0155039	0.0222186	0	0.0159553	0	-0.0197636	0	0	0	-0.0241153	-0.0165342	0.0250486	-0.0312789	-0.0469397	-0.0363808	0	0.0163439	0	0.0179544	0	-0.0168497	0	0	-0.0166911	0	0	0	-0.0192	0	0	0	-0.0205422	0	0
PIMOZIDE	0.00476556	0	0.117227	-0.00308667	-0.00169957	-0.011113	-0.00315378	-0.00909625	0	0.0217986	-0.0252603	0.0153523	0	-0.0423385	0	0	-0.0140587	-0.0255635	-0.00828486	-0.00248211	0	0	0	-0.012027	0.0517912	-0.00712299	-0.00570529	-0.00173495	-0.022115	-0.00376113	0	0	0.01161	-0.0158183	0	-0.0140885	-0.00550765	-0.0137818	0.0123946	0	0	0	0.0134538	0	0	-0.0025147	0.0533698	0	0.00948685
OLAPARIB	0.0227017	0	-0.0555013	-0.0163823	0.0130401	0	0.0224107	-0.0485186	-0.02552	0.0200171	-0.0295634	0	-0.0370484	0	0.0611846	0.0501178	0.0205472	0.0167106	-0.0367428	-0.00621142	-0.0404646	0	0	-0.0115475	0.0246664	-0.0162344	0.00805559	0.0131198	0.0733275	0.00501578	0	0.00609804	0.00601353	-0.0049502	0.0195319	-0.0143208	0.00125826	-0.00913691	-0.020908	0	0	0	0	0.0253925	0.0125947	-0.0143858	0.0286067	0	-0.00174922
GSK1059615	0	-0.0191531	0	0	-0.0183769	0	-0.0265088	0	0.0731396	0.0286489	0	-0.0175863	-0.00601719	0	-0.0859638	-0.0176366	-0.0484784	-0.0224594	0.03776	0	0.0275464	0	0	-0.0449631	0.0395744	0	-0.0923431	0	-0.0301137	-0.0405162	0	-0.0150438	0.120182	-0.01259	-0.02333	0.001945	0	0.0165356	0.173423	0.0181047	0.0174796	0	-0.0229719	0	-0.0397125	0.0969341	0.0305322	0	0
FORETINIB	0	0	-0.0335379	0	0	0	0	0	0	0	0	0	0	0	-0.153661	0	0	0	0	0	0	0	0	0	0	0	0	0	0	0	0	0	0	0	0	0	0	0	0.0330304	0	0	0	0	0	0	0	0	0	0
LE135	0	-0.0182059	0	-0.0232003	-0.0128788	0	-0.0153074	0.0321669	0	0.0277361	0.0095761	0	0.0190856	0	-0.0106204	0.011615	-0.00682279	0.0116573	0.0167137	0.0127763	0.0310661	0	0	-0.0368378	-0.0257203	0.00762789	-0.0293565	-0.0290887	-0.0385035	0.0167808	0	0	0.000166091	-0.012367	0	-0.0107265	-0.0014976	-0.0390189	-0.0232717	0	0.0193596	0	0.0121806	-0.0111629	0	0.00427641	0	0	-0.012698
IRINOTECAN	0	0	0	0	0	0.012155	0	-0.0113152	0	0.0249732	-0.0380431	0	0.0640353	-0.04411	0	0	-0.0397617	0	0	-0.0406239	0.131163	0	0.00532962	-0.03348	0.0130062	0	-0.0621397	-0.0565158	-0.00349789	0.0387242	0	-0.0126458	0.0237433	-0.0204783	-0.0171573	-0.0217488	0.0186211	0.0158436	0	0.083109	0	0.0148763	0.0282819	0.010485	0.199332	-0.0348562	-0.00658771	0.0669585	-0.0255744
DABRAFENIB	0	0	0	0	0	0	0	0	0	0	0	0	0	0	0	-0.167447	0	0	0.169423	0	0	0	0	0	0	0	0	-0.403415	0	0.186902	0	0	0	0	0	0	0	0	0	0	0	0	0	0	0	0	0	0	-0.120633
VINORELBINE	0	0	0	0.0140092	0.0296016	0.0053125	0	-0.0117168	0	0	0.0176142	0	0.05008	-0.0378092	0.0165812	0.0130629	-0.0187044	-0.0291902	-0.0236241	0	0.0208004	-0.0120263	0	-0.0151805	0.00685231	0	0	0	-0.0107257	0.021745	0	0.0143637	0.0119275	0.0140639	0	-0.0134152	0.0168211	0	0	0	0	0	0.0360202	0.0655712	-0.0162722	-0.0335966	-0.014976	0.0272254	0.029092
AT7867	0	0	0	0	0	0	0	0	0	0	0	0	0	0	-0.0562342	0.114522	0	0	0	0	0	0	0	0	0	0	0	0	-0.019335	0	0	0	0	0	0	0	0	0	0	0	0	0	0	0	0	0	0	0	0
NVPBEZ235	0	-0.0186778	0	-0.00617358	-0.0154031	0	-0.0133394	0	0	-0.0193661	-0.0133478	0	0	-0.0337083	-0.046175	0.0191662	-0.0165405	-0.0102096	0.00488423	-0.00721823	0.0936429	0	0	0	0.0115539	0.00334711	-0.00930627	-0.0100333	-0.0171852	-0.000685931	0	0.0141059	0.0459523	0.00312863	0	0.0330234	-0.00459719	0.00666118	0.200945	0.013862	0	0.0185525	0	-0.035825	0	0.00291123	0.0146278	0	-0.000122091
TG101348	-0.0104839	0	0.0297554	-0.0221729	-0.00307794	0	-0.0325752	0	0	0	-0.0133027	0	0	-0.0172733	0.0191155	-0.0388869	-0.00952755	0	0	0.00862309	0	0	0	-0.00714848	-0.0312981	0	-0.0312832	-0.0173661	-0.0746618	-0.0248901	0	0	0.00417402	-0.0144915	0.017345	-0.0510042	-0.000487755	-0.0030802	0	0	0	0.00280562	-0.0368939	-0.0148378	-0.0157708	-0.0063376	-0.0441567	0	-0.0177992
EVEROLIMUS	0	0	0	0	-0.0700812	0	-0.0957233	0.0100671	0	0	-0.0516372	0	0	0.00388558	0.0056075	-0.057554	-0.0578275	0	0.0220837	0.0202375	0.025265	-0.00750442	0.0109941	-0.013155	0.00244942	0.0170347	-0.0986603	0	-0.0524688	-0.0757953	0.0183884	0	0.00144893	-0.0396186	0.026191	-0.0236031	0.0140736	0.0127386	0.00998679	-0.00358039	-0.0168521	0.0511891	-0.0126688	0.000865	0	0	-0.0212825	0	-0.0161614
BMS345541	0.0217882	0	0.0209192	0	-0.0399712	0	-0.0189464	0.0141368	0.0537654	-0.0276421	-0.0146606	-0.0123898	0	-0.0104575	-0.000271053	5.4e-05	-0.0698858	0	-0.0144688	0.0156619	0.0248382	0	-0.0100741	0	-0.0412113	0.0174847	-0.0535175	-0.0314392	-0.0533072	-0.0394792	0	-0.0110717	0	0	0.00926558	-0.0231201	0.0209131	0	-0.0509426	0.000720385	0	0.0973062	-0.00198539	-0.0528408	0.0332483	0	-0.0295712	0.0312656	-0.0115173
BELINOSTAT	0	0	0	0	-0.0208215	-0.0101702	-0.0922142	-0.0104198	0	0.0281293	-0.0879956	0	0	-0.0170498	-0.0160915	-0.0720502	-0.0537969	0	0.0164881	-0.0173192	0	-0.00665083	0.0112844	-0.0142986	-0.0165258	0	-0.124936	-0.0590817	-0.0926694	-0.0659019	0.000584688	0	0	-0.0216036	0.028326	-0.101618	0	0	0	0.0171579	0	0.0452756	-0.0358571	-0.0213465	0.0144472	0	-0.0582158	0.0178458	-0.0275812
SGX523	0	0	-0.132273	0	0.214278	0	0.158193	-0.148425	-0.0282842	-0.387232	0.216633	0	-0.181643	0.18564	0.122542	0	0	0.242858	-0.160928	0	-0.171992	0	0	0	0	-0.127828	0.22882	0	0.122239	0.163428	-0.18049	0.0117096	0.0298721	0.169935	0	-0.147075	0	0	-0.0262854	0	0	0	0	0	0	-0.185677	0	0	-0.147955
MITOXANTRONE	0.0236082	0.0196297	0	0	-0.0210025	0	-0.0151625	0.0659825	0	-0.0537889	-0.00920028	-0.0168145	0.0285844	2.92e-05	-0.0476268	0.00310975	-0.0407286	0.0191425	0.05027	0.05942	0.125396	0	-0.0108118	-0.02015	-0.0241369	0.112658	-0.07552	-0.0247719	-0.127687	0.0371356	-0.0176963	0.033546	0.0301112	0	0.000669167	-0.0927953	0.0469731	-0.00351306	0.0752323	0.0158615	0	0.0804244	-0.0378845	-0.030954	-0.00242028	0.0293785	-0.0218665	0.04407	-0.0800297
FLUOROURACIL	0.0430981	0	0	0	0	0	0	-0.02924	0	0	0	0	0	-0.036579	0	0	0	-0.029911	0	0	0.0432787	0	0	0	0.020975	0.033368	0	0	0	-0.0264615	-0.0301755	-0.036255	-0.037235	0	0	0	0	0	0	0	0	0	0	0	0	-0.0182015	0	0.0258005	0
KU55933	-0.0326129	-0.0181159	0	0	0.00770482	-0.0111105	0	-0.0399234	0.0388763	0.0373725	0.0222311	-0.0120191	-0.0167225	0	0.0193517	0.00253058	-0.0152236	-0.0300279	-0.00844036	-0.0163617	0	-0.0118827	0	0	0	-0.0949014	0.0202031	0	0.0522562	-0.0402639	0	-0.0445408	0.0125939	0	-0.0138806	0	-0.0174053	0	-0.0317022	-0.011111	-0.0204057	-0.0201284	-0.0112571	0.0110917	-0.0357606	0.0169625	0.0198535	-0.0558679	0
OSI930	0	0	-0.0275683	0	0	0	0	0	0.0210967	0.136722	0	0	0	0	-0.0525038	0	0	0	0	0	0	0	0	0	0	0	0	0	0.0294846	0	0	-0.0213713	-0.029255	0	0	0	0	0	-0.0247071	0	0	0	0	0	0	0	0	0	0
CD1530	0	-0.02565	0	-0.0642297	-0.0221701	0	0.00343578	0.259064	0	-0.0178946	-0.017538	-0.0404556	0.142245	0	-0.0359634	-0.0704644	-0.0381839	0	0	0.00203811	0	0	-0.0226881	-0.0324808	-0.0363781	0.0117393	-0.0608732	-0.0268119	-0.0780909	-0.0195107	0	0	-0.0026495	-0.0513143	-0.0428897	-0.0160062	0.00563913	-0.0388274	0	0.0191569	0.0149692	0	-0.0284353	-0.0212366	0	-0.0144584	-0.0546009	0	-0.0478799
IMIQUIMOD	0	0.0202653	0	0.00434706	-0.00972477	0	-0.0105481	-0.0140427	0	0	0.00541265	-0.0320583	0	0.00707775	0.0128918	0.0287638	-0.00965711	0.0511167	-0.0182546	-0.0169914	-0.0412046	0	0	-0.00257582	-0.0203195	-0.0121674	0.000371029	-0.00567794	0	-0.0262471	0	0	-0.0237731	0.00529956	0	0	-0.0186539	-0.00297956	0	0.0176115	0	0	-0.0162878	0	0	0.00384645	0.0381085	0	-0.00670354
BIX01294	0.0253168	0	0	0	0	0	0	-0.0116808	0	-0.0207364	0	0.0282573	0	-0.0288877	0	0	0	-0.044397	0.0138933	0	0	-0.0126035	0	0	0.0148729	0	-0.0274003	0	0.000211538	0	-0.0214009	-0.0146212	0	0	0	0	0	0	-0.0120508	0	0	-0.0176488	0	0	0.0217456	0.00613567	0	0	0.00940717
NICOTINAMIDE	-0.0243479	0	0	-0.0295969	0	0	0	0.0273539	0	0.0360479	-0.0193203	0	0.0162884	0.00149475	-0.0497636	0	0	-0.0112869	0.0184554	-0.00899861	0.0412961	0	0	0	-0.00713682	0	0	0	0	0	0	-0.00347454	-0.0247292	0	0.0106014	0.00493159	0.0149317	0	0	0	0	0.0970269	0	-0.037233	0	0	-0.0201005	0.000458182	-0.0257396
TEMOZOLOMIDE	-0.0266522	0	0	-0.0154508	-0.00401582	-0.0128804	-0.0240604	-0.0757386	0	-0.0339643	-0.0096878	0.0305133	0	0.0176513	-0.0103445	0.0369012	-0.00846628	-0.0179013	-0.0118681	-0.0232785	0	0	0	0.00768541	-0.0316368	-0.0327677	0.00255662	-0.00552853	0	0.000196324	0.0182884	0	0.00423859	-0.0298208	0	0.0151625	-0.0187526	0.010144	0	-0.0196463	0	0.0228403	0	0	-0.00181361	0.000917091	0	-0.0314377	-0.0144258
TIVANTINIB	0	0	-0.080585	0	0	0	0	0	-0.0227287	0	0	0	0	0	0.0320996	0	0.124033	0	0	0	0	0	0	0	0	0	0	0	0.0323575	0	0	0.0377421	0	0	0	0	0	0	-0.0251029	0	0	0	0	0	0	0	0	0	0
BMS536924	0	-0.0214241	0	-0.0132484	-0.0233388	0	-0.0283376	0	0	0	-0.0026242	0	-0.0183578	0	0.00100333	0	-0.0284805	-0.0369867	0.0596911	-0.0035052	0	0	0	-0.00268681	0.0245767	-0.00116554	-0.0216942	-0.0223004	-0.0189386	-0.0382523	0	0.0733014	-0.00752623	-0.0112587	0	-0.0123594	-0.00576842	0.0126627	0.0423369	0	0	0.0205531	-0.0371458	-0.0181972	0	-0.00101466	0	0	0.00186976
SB525334	0	0	0	0	-0.0113277	0	0.0220242	-0.019242	0	0	0.0145397	0	0	-0.0133929	0.0416092	-0.027189	0.0430797	0.0162865	-0.0361146	0	-0.0471811	0.0126612	0.011632	0.015718	-0.0127081	-0.143075	0.0244069	0.0113264	0.0143074	0.0365078	-0.0166184	0.0273272	-0.029277	0	0	-0.0120806	-0.0149922	0	-0.0239451	0	0	0.0205147	0	0	0	-0.0112689	0	-0.0130688	0
LY2183240	0	0	0	-0.011774	-0.00376192	0	-0.014518	-0.00149643	0	0.0247261	0.0009738	-0.00946679	-0.0182478	-0.00987673	-0.0244116	0	-0.0049027	0	0	-0.00976485	0	0	-0.00976768	-0.0145022	0.0156287	-0.00622343	-0.0306052	-0.0161565	0	-0.00668892	0	0	-0.00381228	-0.0183349	-0.01611	0	-0.0150955	-0.0143495	-0.0232657	0	0	-0.0136497	0.0256863	0.12755	0	-0.00354817	-0.0139615	-0.0104496	-0.0171972
VALPROICACID	-0.0119439	0	-0.150932	0.00101588	0.020672	0	0.0136905	-0.123066	0	0.0231386	0.0176861	0.031181	-0.0239906	-0.0216147	0	0.084571	0.00212181	-0.00178962	-0.0670854	-0.0168212	-0.02056	0.01734	0.0123568	-0.00552077	0.028698	-0.0376979	-0.000241324	0.00719098	0.0791689	0.00133588	0	-0.00111182	-0.00562532	-0.0103577	0.0365477	0.0373002	-0.0269108	-0.0014251	-0.0166548	0	0	0	0	0.0237342	-0.0359214	-0.00832127	0.0214317	-0.0322311	0.00848627
PONATINIB	0	0	0	0	0	0	0	0	0.0929413	0	0	0.18585	0	0	-0.196214	0	0	0	0	-0.116038	0	0	0	0	0	0	0	0	0.0414292	0	0	0.0653808	0	0	0	0	0	0	0.0237825	0	0	0	0	0	0	0	0	0	0
DASATINIB	0.0175729	0	0.0264208	0	0	0.0277287	0	0	-0.0205737	0	-0.0183642	-0.00485942	0.0217609	-0.0105971	-0.0608036	0.00771771	-0.020125	-0.0117444	0.0156098	0	-0.00883107	-0.0119265	0	0	0	0.0199917	-0.0213689	0	-0.0426418	0	-0.0178288	0.129313	0.0201563	-0.0220375	0	-0.0152525	0	0.0149597	0.0168617	-0.00848812	0	0.018265	0	0	0	0.0322262	0	0	-0.00219981
SORAFENIB	0	0	0	0	0	0	0	0.00195904	0	0	0	-0.00986117	-0.0137284	-0.014386	0.0315081	0	-0.0224519	-0.0122558	0	0.0743894	0.0204711	-0.0255006	0	0	0.0324233	0	-0.0567683	0	-0.0336764	0.0192361	0	-0.0103476	0.00376363	-0.0628236	0	0	0.0387403	0	-0.0237701	0	0.0238271	0	0.0415519	0.00596583	0	-0.022197	-0.0193819	0	0.00486617
NVPTAE684	0	0	0.0259354	0	-0.0868393	-0.0156054	-0.02061	0.0224821	-0.0613021	0.0227111	-0.0731228	0.0107052	0	-0.0352831	-0.023583	-0.0345029	-0.0563153	-0.0630729	0.014235	0	0	-0.01786	-0.022158	-0.0151232	0.0187358	0	-0.152409	-0.0143992	-0.0521426	-0.0614036	0.0487706	0.0976591	0.05322	-0.0172719	0.0153921	-0.0298385	0	0	0.111551	0.0160642	-0.00356036	0.02132	-0.0487369	0.012115	0	0.0491048	-0.0423763	0.0138367	-0.0375677
CANERTINIB	-0.0195186	0	0	-0.0183867	-0.0168934	0	-0.0355547	0.02863	-0.137465	0	0	0	-0.01892	-0.010469	-0.00102368	0	-0.0177419	0	0	0	0.00162714	0	0	-0.0170666	0	0	-0.0369944	0	0.00904974	0.0260133	0.0412672	0.0337607	0.0173176	0	-0.00157385	-0.029301	0	0	0.0223391	0.019966	-0.022635	0.0152488	-0.0258737	-0.0122981	0	0	0.00272481	0	0
TPCA1	0.0207853	0.0193506	-0.0635983	-0.0082198	-0.000396225	0	0.0181226	0	0.0713733	0.0431236	0.00736705	0	0.0248719	0	-0.0922348	0.00565333	0.0122124	0.0181075	0	0.00703863	0.0274989	0	0	-0.0151359	0	-0.00546216	-0.0184574	-0.012503	0.00125268	0.00608049	0	0	0.0126917	-0.00509294	0	-0.0221228	-0.0125363	-0.0176833	0.0365955	0	0	0.023085	0.0160297	-0.0190464	0	-0.0109389	0	0	-0.00801083
GDC0941	0	0	0	0.0201839	-0.0282189	0.0139791	-0.0410167	0.00714089	-0.0282783	-0.022765	0	-0.0221864	0	-0.00891981	-0.00823	0	-0.0621983	0.000523654	0.0387889	0	0.0260482	-0.012811	0.0116618	0.0132389	-0.0443902	0	-0.0784339	-0.0398486	-0.0345682	-0.0334281	0.0177081	0.049073	0.0669301	0	0.0289346	-0.0234688	0	0	0.187676	0.0137175	0	0.0396647	-0.016786	-0.045584	0	0.00423125	0.010831	0	0
TIVOZANIB	0.0141667	-0.0192541	0	-0.017971	1.86e-06	0	-0.00505181	-0.0400947	0	-0.0518021	-0.005626	0	-0.0203625	0	0.00910018	-0.0181497	0.00907358	0	0	-0.00912892	0	0	0	-0.0116379	0	-0.0204364	-0.0169668	0.00245897	0.0217364	-0.00341431	0	0	-0.00576477	0.00894181	0	0	-0.0110759	-0.00221931	-0.0636816	0.00473278	0	0.0189097	0	0	-0.0130333	0.0135448	0.041245	0	-0.00812299
RUXOLITINIB	0	0	0	0	0.000680893	0	0	-0.012363	0	0	0.0139875	0	0.0226831	0.0221398	0.0250759	-0.0133706	-0.0331139	0.00903923	0	0	0	0	-0.00946054	0	-0.00855385	0	-0.0147681	0	0.0118234	0	0	0.0104991	-0.0100336	0	0	-0.00242731	-0.0176867	0	-0.00608329	0	0	0	0	-0.00908135	0	-0.0101332	0	0	0
MGCD265	0	-0.138338	-0.0294908	0	0	0	0	0	-0.0315646	-0.343085	0.243265	0	-0.113925	0	0.225885	0	0	0.171472	-0.205715	0	-0.366627	0	0	0	0	-0.29565	0.225153	0	0.126352	0.16471	-0.228107	-0.0267537	0.0580392	0	0	-0.376945	0.113415	-0.156122	-0.0504654	0	0	0	0	0	0	-0.191782	0	0	0
ABT737	0	0	-0.0316171	-0.00734745	0.00625905	0	0.0030026	0.0059525	0.14681	0.00675321	0.000785867	-0.0147942	0.0189022	0	-0.0421443	0	-0.00597745	-0.0209703	0	0.0003397	0	0	0	-0.0175048	0	-0.0051739	-0.0111627	-0.00407005	5.04e-05	-0.0004931	0.0217413	0	-0.00222591	-0.0107928	0	-0.0274317	-0.00763422	-0.00741435	-0.0395121	0	0	0.0190188	0	0	0.0143017	-0.0090066	0.00275889	0	-0.00884445
AMONAFIDE	0.0230657	0	0	0	-0.0319642	0	-0.0166369	0	0	0	-0.0372553	-0.0106794	0.0207319	-0.0247208	-0.016961	-0.0118754	-0.0368025	0	0	0	0.0305307	0	0	0	0.01285	0	-0.043435	0	-0.0447119	-0.0355989	0	0.0129329	0.0152817	0	0	0	0	0	0	0	0	0.0665603	-0.0198254	-0.0409202	0	0	-0.03971	0.0315225	-0.0147273
SELUMETINIB	0	0.0185631	0.0799717	-0.0210108	0.0193913	0	0.00487745	-0.0619931	0.03108	0.0460896	-0.022349	0	-0.0419678	0	-0.0633988	0.0317569	0.00447167	-0.0162881	-0.04722	-0.00238103	0	0	0	-0.0104969	0	-0.0112588	-0.0259251	-0.0224575	0.0575821	0.021415	0	0.0178136	-0.00956415	-0.01086	0	-0.0119342	-0.00427424	-0.0120677	0.0120763	0	0	0.0228359	-0.0346114	-0.0072	0	-0.0187272	0.0148336	-0.0216642	-0.0184365
AZD6482	0	0	0.0298617	0	-0.0125688	0	0	-0.0154395	-0.0490925	0	0	0.0118498	-0.0464322	-0.0198981	0.00716132	0	-0.0168978	0	0.0112218	-0.0158958	0	0	0	0	-0.00809635	-0.0361886	0	0	0.0348255	-0.0252919	-0.0392175	0.0103973	0.0829299	0	0	0	-0.0015825	0.0235556	0.0201857	0	0	0	-0.0106613	0	0	0	0	0	0
SERDEMETAN	0.0571675	0	0	0.00361819	-0.0204192	-0.0147475	-0.0272462	0	0.0885258	0	-0.00168	0	0	0	-0.0264829	0	-0.0272507	0	0	-0.0127777	0.0281618	0	0	0.00359569	0	0.00424706	-0.0130423	-0.011244	0.0132196	-0.0105425	0	0	-0.00815263	-0.0011448	0	0	0.0047724	0	0.0111014	0.0164953	0	0	0	0	0.0397325	0.000843824	0.0360908	0.0215597	-0.000239275
MG132	0	0	0	-0.0232231	-0.0484331	-0.0122872	-0.0964892	0.207845	0	0.0403311	0.017505	0.0118814	0.0742941	-0.0319277	0.00994071	-0.0589498	-0.0346808	-0.0363235	0.0102183	0.0271039	0	-0.0295106	-0.000778214	-0.0787146	0.0187413	0.512025	-0.05195	-0.0180769	-0.0891238	-0.0731547	-0.0163119	0.0148961	0.0126866	-0.0365431	-0.0417087	-0.050409	0.0230092	-0.039975	0	0.0120138	0	0	0.0158381	0.0210323	0	-0.0216234	-0.0607458	0.0187765	-0.0267466
ETACRYNICACID	0.0224686	-0.0487616	0	0	0.0184072	0	-0.0313013	0	0	-0.0235961	0	0	0	-0.0182481	0	0	-0.0147459	-0.0242403	0	-0.0445703	0	0	-0.0382116	-0.0313544	-0.0135453	0	-0.0426816	-0.0257388	-0.0294291	-0.0277309	0	0	0	-0.0298434	-0.0250603	0	-0.0524391	0	0.0167322	-0.0230569	-0.0219832	-0.0173472	0	0.0108747	0	0.0187556	0	-0.0146034	0
GEFITINIB	0	0.0159459	-0.0711954	0	0	0	0	-0.0143909	0	0	0.0124194	0	-0.0194213	0.00992673	-0.0386484	-0.0130575	0	0	0.0100718	0	0.0235868	0	0	0	-0.010681	0.0156747	0	0	0	0.0195808	0.0157687	0.00954539	0.00255816	0	-0.00887596	-0.011805	0	0.0217122	0.00834697	0	0	0	-0.0265142	0	-0.0227306	0.0163046	0	0	0
TRETINOIN	0	0	0	0	-0.00872107	0	-0.024615	-0.0149534	0	0	-0.016293	0	0	0	-0.0207907	0.014706	-0.0161255	0.0142008	0	-0.00156474	0	0.0137308	0.0203882	-0.00630439	-0.0258444	-0.00235459	-0.0126875	-0.0253123	-0.0120184	-0.0171722	-0.0186028	0	-0.00595406	0.00307056	0	0	-0.0109885	-0.00832852	0	0.0151781	0	0.0342688	0	0	0	-0.000435089	0	-0.0188479	-0.00632052
PHA793887	0	0.0202119	0	0	-0.0462105	-0.017	0	0.0328318	0	-0.0674732	-0.0222031	-0.0158841	0.014265	0	-0.0694167	-0.038089	-0.0589928	0	0.0254925	0	0.0251471	0	0	-0.027422	-0.0339035	0.0259289	-0.0590689	-0.0344631	-0.106193	-0.00841583	0.0160259	0.0238468	0	-0.0174311	0.00402539	-0.0742246	0	0.00801333	0.0195261	0	0	0.0628931	-0.0130344	-0.0323067	0	0	-0.0366837	0	-0.0332054
BI2536	-0.0181572	0	0	-0.0187006	-0.0163218	0	-0.0121636	0	0	0	0.00658125	0	0	-0.00160444	-0.000364643	-0.0779817	-0.0129496	0.0157958	0.0166472	-0.0100141	0	0	0	-0.0315596	-0.0114278	-0.00711319	-0.0543963	-0.0349453	-0.0323171	-0.0148216	0	0	0.00349161	-0.0281957	0.0330542	-0.0831747	-0.00615174	-0.0126619	0	0	0	0.0226759	-0.0341939	-0.0264792	0.0200219	0.00355583	-0.0634242	0	-0.035371
FLUDARABINE	0.0622325	0	0	0	-0.0381848	0.00746214	0.0153172	0.0562634	0	0.0275279	-0.0178675	-0.00216071	0	0.0256262	-0.0251729	-0.0429788	-0.0215467	0.0347139	0.0225939	0.0198278	0.0700968	0.0123485	0	0	0.0185287	0.0538119	-0.0569711	0	-0.01761	0.0343569	-0.0243781	0.0762154	0.0292809	0.0134997	-0.0168731	-0.0850173	0.0255881	0	0.0277641	0.0167163	0	0.0332408	-0.0211381	0.0113058	0.0726767	0.0136779	0.010116	0.0188202	-0.0361563
PI103	0	0	0	0	-0.00593164	0	-0.0144042	0.0222195	0	-0.0269357	0.00129174	0.0176671	0	-0.0144213	-0.0147175	0	-0.0148139	-0.0116137	0.0268385	-0.00629936	0	0	0	0.00661186	-0.0130336	-0.00158	-0.0294571	-0.0110067	-0.0239414	-0.0226465	0	0.0177808	0.0630221	0.00391583	0	-0.0142805	-0.0153544	0.00541863	0.240804	-0.0135458	0	-0.0252472	0	-0.02325	0	0.002456	-0.0161172	0	0.000444318
MK2206	0	0	0	-0.0283727	-0.00302863	0.0209094	-0.0162922	0	0.0008	0.0755129	-8.58e-05	0	0	0	-0.0256682	-0.0124617	-0.00416627	0	0.0362739	-0.00150485	-0.0289868	0	0	-0.0170724	0	-0.0157637	-0.0403741	-0.00902299	0	0.00542745	0.0158138	-0.0112804	0.0186282	-0.02318	0.0172542	0.0165597	-0.016886	-0.0155503	0.138939	0	0.0213221	0.0418659	-0.0353728	0	0	-0.0120131	0.0145172	0	-0.0126938
AZD8055	0	0	-0.0264717	-0.0115364	-0.0107695	0	-0.00654971	0	0.0234258	-0.0206582	-6.32e-05	-0.0199369	0	0	-0.0844582	0	-0.00616613	0	0.0433122	-0.0125843	0	0	0	0.00231721	0	-0.00643152	-0.0169981	-0.000771176	-0.0828116	0.012197	0.0215338	-0.0103077	0.0549317	-0.0212677	0	0	-0.000948418	0.00319304	0.271184	0	0	0	0	0	0	-0.0126629	0.00557111	0	-0.00934378
ERLOTINIB	0	-0.00668344	-0.00735083	-0.0107531	0.013602	0	0	-0.0196696	0	-0.0185521	0.00937	-0.0115852	0.0156113	-0.0125463	-0.0620086	0.00578442	0.0170286	0	0	0	0.0554564	0	0	0	0	-0.0468539	0.0435375	0	0.00287276	0	0	0.0193768	-0.0218216	0	0	-0.0152454	0.0193375	0	0.0143063	0	0	0	0	0.0121144	0	0	0	-0.0374579	0
SUNITINIB	0	0	0	0	0.014423	0	0	0	0	0.0274911	-0.0208128	0	0	-0.0272271	0.0274843	0	0	-0.011384	0	0	-0.0190475	0	-0.021505	0	0.0180548	0	0	-0.0200631	0	0.0179747	-0.0244519	-0.0097575	0.00714618	0.0218058	0	0	0	0	0.000891974	0	0	0	0.00667827	-0.0101488	0	-0.026372	0	0	0.00970268
MEBENDAZOLE	0	-0.0219966	0	0	0.0153823	0	0	0.0102002	0	0	-0.00154444	0	0.0147994	0	-0.0103677	-0.0121413	-0.0024475	0	0	0	0	0	0	0	0	0	-0.0160594	0	-0.0392887	-0.0109581	0	0.0145412	-0.00208596	0	0	0	0.0158931	0	0	0	0	0	0	0.0769335	0.0164031	-0.0283488	0	0	-0.0239763
NERATINIB	0	-0.0210859	0	-0.00600676	-0.0267824	0.0211317	-0.0257075	0.0424381	0	0	-0.00946445	0	0.00268094	-0.0370033	-0.0347488	0	-0.030872	0	0	-0.00300564	0	0	0.0171917	0	-0.0132614	0.0072852	-0.0242467	-0.0250066	0.0333627	-0.0134093	0	0.0195261	0.00406643	-0.012405	0	-0.0118608	-0.00671857	0.00164461	0.0174348	0	0	0.0236703	-0.0147692	0	0	0.0123824	-0.0193333	0	-0.00736069
PYRIMETHAMINE	0.0097375	-0.020315	0	0	-0.0198142	0	0	0	0	-0.0199039	-0.00257139	0	-0.0344272	0	-0.00791442	-0.00291462	0	0	-0.0287204	0.00613778	0.0614829	0	0	0.0167283	0.0163065	-0.0195453	0.0821331	0	0	0.0223433	-0.0190703	-0.0355456	0.0176115	0	-0.0163865	-0.031284	0.0121422	-0.0150869	0	0.0127063	0	0	-0.0115433	-0.00913038	0.0198617	-0.00200539	0.0157873	0	-0.000154423
GW843682X	0.0130711	0	-0.00525292	-0.00330338	-0.00661573	0	0.00214137	0.00742923	-0.0547633	0.0581086	-0.0155438	0.0148787	0	-0.0155635	0.0618661	0.0168102	-0.00271147	0	-0.0146063	-0.0114723	0	0	0.0113465	-0.0124259	0.0138552	-0.0111862	0.00857598	0.0159929	0.0334171	0.0126704	0	-0.0448322	-0.012859	-0.0152911	0.00998846	0.0112935	0.0122848	-0.016962	-0.0616697	0	0	0.000636875	0.0116996	0.0519831	0	-0.00902159	0.00973313	-0.000604808	-0.00809386
GSK461364	0	0	-0.000847083	0.0189078	-0.00259654	0	0	-0.0137287	-0.0254654	0.0525154	-0.0185758	-0.0256908	-0.0162044	-0.0118583	0.04212	-0.0150696	-0.0144147	-0.0152038	-0.00925404	-0.0455558	0	0	-0.0126088	0	-0.000571923	0	0.0250422	0	-0.000309444	0.0226314	-0.0159578	-0.0356631	0.00920306	0	-0.00208654	0.0183796	0	-0.0166525	-0.0656335	-0.0154481	0	-0.0628588	0	0.0144035	0	0	0.0249594	0	0.0247846
IMATINIB	0	0	0.0240375	0	-0.0102282	-0.0226983	0	0	0	0	0	0	0	0	-0.00650986	0	0	0.0198182	0.0093015	0.0196092	0	0	-0.0106558	0.0126577	0	0	0	0	-0.0121221	0	0	-0.0313972	-0.00596925	0	0	0.00177654	0	0	-0.0203369	-0.0119504	-0.0187364	0	0	0.0152273	0	-0.00182695	0	0	0
LINIFANIB	-0.0245679	0	-0.0265108	0	-0.00314089	-0.0133886	0	0	0	0	0.0163117	0	-0.0636044	0	0.0144266	-0.00783808	-0.0132619	0	0	0	0.0232179	0	0.0128955	0	-0.036011	0	0	0	-0.0370266	0.0145972	-0.0235419	-0.0198436	-0.00484539	-0.0204678	0	0	0	0	-0.00843105	-0.00939769	0	0.00579844	-0.032759	0	0	0.0109779	0	0	-0.0425057
HALOPERIDOL	0	0	0	0	0	0	0	0	0	0.0289618	0	0	0	0	0	0	0	0	0.0345486	0.0177858	-0.0560725	0	0	0.03932	0.00130528	-0.01631	0.0217169	0	-0.0138133	0	-0.0345747	0.000588611	0	0.0209431	-0.0218094	0	-0.0186131	0	0	0	0	-0.0104412	0	-0.0187692	0	0	0	0	0
ZEBULARINE	-0.0111614	0	0	0.000445931	-0.0125421	0	0.00766848	-0.0246	0	-0.0176257	-0.0231561	0	0	0.016337	-0.0113627	0.0217695	-0.00789338	0	-0.00786173	-0.0232173	-0.0258357	0	0	0.010351	0	-0.0170794	0.0109602	-0.000251765	0.024725	-0.0182903	0.0223241	-0.0143455	-0.00736523	0.00889632	-0.0140402	0.0150341	-0.0226818	0.0108907	0	0	0	0	0	0.0160755	0	-0.013163	-0.0158075	-0.016237	-0.00785073
MERCK60	0	0	0	0.0146206	-0.0222133	0	0	0.014555	0	0	-0.0185531	0	0	-0.0121331	0	-0.0130092	0	0.0196456	0	0	-0.0199032	0	0.0168175	0	0	0.0162686	0	0	-0.00783417	0	0	0	0.0111253	0	0	-0.0202786	0	0	0	0	0	0	-0.0153339	0	-0.0154542	-0.00394056	0	0	-0.0143261
TACEDINALINE	0	0	0	0	0	0	-0.0532653	-0.0131308	0	0	-0.0525478	0.0370329	0	-0.0681811	-0.0438137	0.0205583	-0.0538559	-0.0859556	0.00229833	0	0.0271212	-0.0103047	0	0	-0.00667	0.0165528	-0.0457416	-0.0629669	-0.0539123	-0.0410662	0	0.0136945	0	-0.0207022	-0.026841	-0.015591	0.0192231	0	0	0	0	0.0198511	0	0	0	0.0340667	-0.00254194	0.0161442	0
RALOXIFENE	0	0	0	-0.0152136	0.0309623	0	0	-0.0427471	0	0	0	0	-0.0244191	0	0.0141502	0.114207	0.0123114	0	0	-0.0156706	0	0	-0.0369356	0.0130413	0	-0.0373856	0.0259356	0.030299	0	-0.0796053	0.0194962	-0.0164481	-0.0413052	-0.0177494	-0.00469604	-0.0141906	0	0	0.00171096	-0.0227137	-0.0203561	0.0259259	-0.0123602	0	0	0	0.00344211	0	0.0595569
BARASERTIB	0.0142086	-0.0179822	0	0	0.00980982	-0.0118952	0	-0.0715064	0.0204671	0	-0.00169333	0	-0.0423944	0.0119702	-0.0114034	0.0114212	0	0	-0.0113564	-0.0163186	-0.0397057	0	0	0	0.0564356	-0.0776417	0.0589528	0.0129253	0.0481814	0.0212464	-0.0170953	-0.0365304	-0.0229778	0	0.0259921	0.0412615	-0.023235	0	-0.0330514	-0.00869385	-0.0233339	-0.0172875	-0.0190356	0.00345289	-0.0156789	0.00985661	0.0261267	-0.0202517	0.0138338
CRIZOTINIB	0	0	0	-0.0158325	0.00522661	0.0137723	-0.0370067	0.0232634	0.0276479	-0.0225779	-0.0343697	-0.0100075	0.0153225	-0.0296519	0.0374534	0.00308308	0	-0.00225538	0.0461686	0.00266722	-0.0163325	-0.0249798	0.0118341	-0.0116018	-0.00693058	0	-0.0626389	-0.0333353	-0.0272842	-0.0228328	0	0.0406091	0.0337812	0	0.0242377	-0.0525983	0	0.0243261	0.0375659	0	-0.0211814	0.0418241	-0.00172788	-0.0450208	0	0.0235913	-0.00443154	0.013774	-0.0120484
NILOTINIB	0.0261711	0	0	0	0	0	0	0.0280689	0	0	0	0.013433	0.025915	-0.00801385	-0.00854737	-0.0136856	-0.0156011	-0.0247883	0	0.0172092	0.0389693	0	0	0	0.0148533	0.0377908	-0.00539417	0	0.00266434	0.0218842	0.0200237	0	0	-0.0195069	0	-0.0135004	0	-0.0209392	-0.0101904	0.0086025	0	0	0.0160933	0.00210538	0	-0.008385	0	0	-0.0111755
PIFITHRINMU	0	0	0	-0.0119494	-0.0146352	0	-0.0146298	-0.0102354	0	0	0	-0.0191295	0	0	-0.012407	0	-0.0111921	0	0	-0.0115972	0	0	0.0107384	-0.0163888	-0.0105485	0.0193509	-0.0342758	-0.0064906	0	-0.0024892	0	0	0.00389469	-0.0308152	0	0	-0.00450984	-0.0201684	-0.00983911	0	0	0	0.0241767	0	0	0.00279618	0.0255867	0	-0.0153578
OFLOXACIN	0	0	0	-0.0252378	0.0463416	-0.00734375	0.0298113	-0.181262	0	0.0809054	-0.0527463	0.0515266	-0.0611112	-0.0230603	0	0.0255125	0.0233509	-0.0299216	-0.0962103	-0.0894109	-0.0241179	-0.0203356	0.0210616	0	0.0285575	-0.114342	0.0625572	0	0.139998	0.0337603	-0.0274028	-0.0586944	-0.0656541	0	-0.0451159	0	-0.0522509	-0.0538331	-0.0542075	-0.0567088	-0.0217125	-0.0704837	-0.0268297	0.0338912	-0.0674291	-0.0725241	-0.0321775	-0.0510978	0
EPIRUBICIN	0	0	0	0	0	0.0410469	0	0	0	0	0	0.0563987	0	-0.136598	0.0822187	0	0	-0.0795219	0	0	0	0	0	0	0	0	0	0	0.0928138	0	0	0	0	0	0	0	0	0	0	0	0	0	0	0	0	-0.0312669	0	0	0
TOPOTECAN	0	0	0	0	-0.0510377	0	-0.0314453	0.0303681	0	0	-0.0539309	-0.0505042	0.0110081	-0.0223702	-0.0212613	0	-0.10787	-0.0198585	0	0.0167131	0.0433736	-0.0179517	-0.00896135	-0.0164315	0.0444648	0.0450709	-0.17296	-0.0419247	-0.121205	-0.00948594	-0.0170628	0.0171183	0	-0.0178937	0.0133017	-0.0911267	0.0479397	0	0.013679	0.0152958	-0.0498546	0.0576147	-0.0139331	-0.0542044	0.0234234	-0.0139721	-0.0905713	0.0625102	-0.0455829
IFOSFAMIDE	0	0	0	0	0	0	0	0	0	0	0	0	-0.0517225	0	0	0	0	0	-0.0494042	0	0	0	0	0	0	-0.0655492	0	-0.0471775	0.0608733	0	0	0	0	0	0	0	0	0	0	0	0	0	0.0481375	-0.0533575	0	-0.0494142	-0.0408733	-0.0532442	0.0512725
FLOXURIDINE	0.0291632	0	0	0.0170694	-0.0343225	0.00742404	0	0.0123308	0	0	-0.0187969	0	0	-0.01343	-0.0161652	0	0	0	0	0	0.0682868	-0.0164479	0.0126808	0	-0.0153462	0	-0.00524389	0	-0.0284517	0	0	0.0428448	-0.0143569	0	0.0157063	0	0.0524053	-0.0130731	0.0104019	0	0	0	-0.0105827	0	0.139233	-0.0122135	-0.00959854	0.0133406	-0.0109131
COLCHICINE	0	0	0	0	0	0	0	0	0	0	0	0	0	0	0	0	0	0	0	0	0	0	0	0	0	0	0	0	0	0	0	0	0	0	0	0	0.064555	-0.0663637	0	0	0	0	0	0.24772	0	0	0	0	0
BIBR1532	0	0	0	0.00033049	-0.0115669	0.0225069	-0.018585	0	0	0	-0.00668785	0.0226439	0	0	-0.0132961	0.0156883	-0.0128971	0.0179417	0	-0.00961902	0.0264939	0	0	-0.0106354	0	-0.00553304	-0.0162189	-0.00931377	-0.0532853	-0.0219383	0	0	-0.0175729	-0.0081474	0	0	-0.00847995	-0.00267426	0	0	0	0	0	0	0.0228233	-0.0106049	0	0	-0.00291235
MEVASTATIN	-0.0630179	0	0	-0.0116975	0.0142695	0.002168	-0.0200694	-0.0229621	0	0	-0.0128131	-0.0108493	-0.02062	-0.0341246	-0.0137471	-0.0116698	0	-0.0350659	0.120408	0	0.0310036	0	0	-0.0245715	0.00334019	-0.0295667	-0.104832	-0.0169678	-0.0421504	-0.0523747	0.0224247	0.0586637	0.0225512	-0.0215903	-0.010555	-0.0357348	0.0189114	0	-0.00955923	-0.013994	-0.0279207	-0.0216628	0	0	0	0.0936373	0	-0.0137771	0
BMS754807	0	0	0	0.0026775	-0.0159929	0	-0.0206202	-0.0182006	0	0	-0.0134978	0	0	-0.0191939	0.0142231	0.0202342	-0.0218326	0	0	-0.0126702	0	0	0	0	0.0162942	-0.00325603	-0.00279098	0	-0.0129478	-0.0336265	0	0	0.0112577	0.0101799	0	0	-0.0178966	-0.00372177	0.0524989	0	0	0.0159366	0	-0.0355703	0	0.00236397	0	0	0.00684735
OBATOCLAX	0	0	0	0	-0.0559088	-0.00986442	-0.0739997	0.0317802	0	0	0.0263783	0	0	-0.0133373	0	-0.0160627	-0.0649836	-0.0290013	0.0141537	0.0299081	0.0261111	0	-0.013171	-0.057252	-0.0143508	0.0231158	-0.0862972	-0.091505	-0.0266748	-0.0554047	-0.0125878	-0.00713654	0.0302583	-0.0601922	0.000280365	-0.0586488	0.0450508	-0.0224925	0	0.00908958	-0.0507868	0.0142875	0.023179	-0.0201481	0	0	-0.00831063	0.0120925	-0.017145
STAUROSPORINE	0.0527014	0.00792188	0	0	-0.0368697	0	-0.0170461	0.0730168	0	0.0926543	0.0188106	0.0455992	0.0260309	0.0322804	-0.0159625	-0.00625711	-0.0676192	0.0169473	0.0534836	0.0237856	0.120439	-0.00297461	0.0345086	-0.00287731	-0.028481	0.139257	-0.0486264	-0.0414608	-0.0953732	0.0472747	0.0290228	0.0952658	0.103334	0.0151131	0.0196815	-0.0773773	0.0244136	0	0.109583	0.0116919	0.0429318	0.0614072	-0.0424217	-0.00703788	0.0496256	0.0367922	-0.0172267	0.0248127	-0.0448828
AMPHOTERICINB	0	0	0	0	0	0	0	0	0	0	0	0	0.0807313	0	-0.158744	-0.16629	0	0	0	0	0	0	0	0	0	0	0	0	0	0	0	0	0	0	0	0	0	0	0	0	0	0.080685	0	0	0	0	0	0	0
DOCETAXEL	0	0	0	0	0	-0.010449	0	-0.0208658	0	0	-0.0245031	-0.0106619	0	0	0.0106987	0	0	0	0	0	0	-0.0115408	0	0	-0.0108221	0	-0.0171919	0	0	0	0.0145459	0.011109	-0.010934	0	-0.0222256	-0.0422902	0.0174914	0	0	0	-0.0211179	0	0	-0.00792875	0	0	0	0.00993596	0.0193396
METHYLPREDNISOLONE	0	-0.0139509	0	0	0.114089	0	0	0	0	0.0224068	0	0.0216303	0	0	0	0	0.0150297	0	0	0.0164653	0	0.0418156	0	0	0	0	0	0.0173325	0	0	0	0	0.0139986	0	-0.0376953	-0.0105383	0	0	0	0	0	0	-0.0171136	0	0.0178581	0	0	0	-0.0174903
DACARBAZINE	0	0	0	0	0	0	0	0	0	0	0.0714537	0	0	0	0	0	0	0	0	0	0	0	0	0	0	0	0	0	0	0	0	0	0	-0.0731113	0	0	0	0	0	0	0	0	0	0	0	0	0	0	0
ABIRATERONE	0	0	0	0	0	-0.0175491	0	-0.0220044	0	0	0	-0.0193138	-0.0226381	0	0	0.00587562	0.00316125	0	-0.0146962	0	0	0	0	0	0	0	0	0	0	0	-0.0190609	0	0.000907188	0	0	0	0	0	0	0	0	0	0	0.03669	0	0	0	0	-0.0177922
ISONICOTINOHYDROXAMICACID	-0.0224179	0	0	0.0220247	0	0	0.0949306	-0.083406	0	-0.04821	0.0237291	0	0.0224925	0.0219597	0	0.0449531	0.106976	-0.00484146	-0.0166904	-0.0726897	-0.0643967	0.0157725	0	-0.000604375	0.035647	-0.0425541	0.0693659	0.0604407	-0.0199453	0.0291659	-0.0237104	-0.0172	-0.044106	0.00844625	0	0.0344628	-0.0617022	0.0249997	-0.0695405	0	0	0	0	0	-0.0432703	0	0	-0.0369903	0.0678656
NELFINAVIR	0	0	0	-0.0180028	-0.010813	0.0153329	0	0.0230573	0	0	0.0189889	0	0	0	0	0.0144081	0.0194494	0.0125435	0.011973	0.0165711	0	0	0.0107861	0	0.0105467	0.0185872	0	0	0	0.0164319	0	0.0119334	-0.0130675	0.0157783	0	0	0.0187881	0	0	0	0	0	-0.0108252	-0.0248106	0	-0.0102636	0	-0.0118804	0.0157662
SB431542	0	0	0	0	-0.0103625	0	0	-0.00137385	0	0.01894	-0.0168842	0	0.0176272	-0.0142838	-0.00783288	0.0243569	-0.0184447	0	0	0	0	0	0	0	0.0101867	0	0.0225125	0.0223828	0.0149054	0.00189417	0	0.0123337	-0.0260023	0	-0.0125902	0	0	0	-0.0240633	0	-0.0165589	0	0	0.0102173	0	0	0.0130173	0	0
ISOX	0	0	0	-0.0179129	-0.00333227	-0.00832365	-0.00516044	0	0	-0.0136271	-0.0142494	0.0047625	-0.0368678	-0.0299902	-0.0144448	-0.136749	-0.0114701	-0.024779	0.012151	-0.0025698	0	-0.0247795	-0.0125611	-0.0111485	0.0174011	-0.00923858	-0.0319068	-0.00715177	-0.048813	-0.00394618	0	0	-0.00876109	-0.0286423	-0.0137702	-0.0425175	-0.00319403	-0.0193088	0	0	0	0	0.0178873	-0.011141	0	-0.00545709	-0.069524	0	-0.0147716
MASITINIB	0	0	-0.0293879	0	0	-0.0247257	-0.0160814	0	-0.024715	0	0	0	0	-0.0115419	0.0126025	0.0177985	0	0	0	0	0	0	0	0	0.0152006	0	-0.0387042	0	-0.0137838	-0.0178553	0	-0.010098	0.00304879	-0.0120008	0.0134617	-0.00940712	0	0	-0.0244491	0	0	0.0183097	0	-0.0195667	-0.0137081	0	0.00932346	0	-0.012468
PAZOPANIB	-0.0300196	0	-0.0613771	0	-0.0120829	0	0	-0.0473873	-0.0304958	-0.122532	0	-0.0415875	0	0	0.0501663	0	-0.0369364	-0.0179577	-0.0384543	-0.0185292	0.0282729	0	0	0	0.0441487	-0.0536942	-0.0322231	0	0.0297508	0.0210836	0	0.0333791	-0.0102939	-0.0278894	0	-0.0387423	-0.0394544	0	-0.0270528	0	0.0224861	0.02204	-0.0153125	-0.0116354	-0.0150111	0	0.00225981	-0.012349	0.0100388
ALISERTIB	0	0	0	0.0238578	0	0	0	-0.02618	0	0	-0.0146581	0	0.0211682	0	0.0210613	0	0	-0.0433094	0.002555	0	-0.0293037	0	0	-0.0160647	-0.0238978	-0.0235747	0	0	0.0176916	-0.0156047	-0.0226086	-0.0647525	-0.0221322	0	0	-0.0162131	0	0	-0.0681588	0	0	0	0	0.0167162	0	-0.0479541	-0.0192144	-0.0152525	0
IDOXURIDINE	0	0	0	-0.0855237	0	0	0	0	0	0	0	0	0	0	0	0	0	0	0	0	0	0	0	-0.07934	0	0	0	0	0	0	0	0	0	0	0	0	0	0	0	0	0	0	0	0	0	0	0	0	0
ENTINOSTAT	0.0486182	0	0	0.015205	-0.0379675	0	-0.0433114	-0.00774893	0	0	0.00365778	0.0098675	0.0181853	-0.0209379	-0.0107745	-0.0302087	-0.0807789	-0.00910058	0.0111868	0	0	0	-0.0223698	-0.0148827	-0.0241677	0	-0.115498	-0.0737025	-0.0466018	-0.0712997	0	0.00990071	-0.0126857	-0.0358192	0	-0.0369806	0.0428142	-0.0126742	0	0	-0.0240371	-0.00264719	0	-0.00407692	-0.0135614	0.0208804	-0.031589	0	-0.00244482
MLN2238	0	0	0	-0.0141904	-0.00730186	0	-0.0337927	0.242695	0	0	-0.00960325	0	0.0493578	-0.0499803	0	-0.0669058	-0.0209875	-0.0341369	0.0219922	-0.0212523	0	-0.0198192	-0.00611917	-0.0341334	-0.0500956	0.140114	-0.0454354	-0.0234785	-0.0817942	-0.0234139	-0.00156438	-0.0201336	0.00793073	-0.0357352	-0.0533778	-0.0437386	-0.00411495	-0.0259609	0	0	-0.0325693	0.0181284	-0.0173306	-0.0405517	0.000339167	-0.0109716	-0.0450553	0.0258503	-0.0335239
LEFLUNOMIDE	0.0288339	0	0.150643	0	-0.0348275	-0.0100369	-0.0150053	0.00969	0	0.00562929	0.00417861	0	0	0	0	-0.0142804	0	-0.0157442	0.0159313	0	0	0	0	0	-0.0222623	0.0216944	-0.0498067	0	-0.0510185	-0.0381714	0	0.0230456	0	0	0.00243646	-0.0314875	-0.0292592	0.0193417	0.0161379	0.0103033	0.00255071	0.0547259	-0.0115788	-0.024094	0	0	-0.0179098	0	-0.013875
FLUMETHASONE	0	0.0777713	0	0	0	0	0	0	0	0	0	0	0	0	0	0	-0.0516525	0	0	0	0	0	0	-0.0945938	0	0	0	0	0	-0.0672538	0	0	0	-0.0512125	0	0	0	0	0	0	0	0	0	0	0	0	0	0.0683862	0
TERCONAZOLE	0	0	0	0	0	0.00956769	0	-0.00915904	0	0	0	-0.0236133	0	0	0	0.00873625	0	-0.01345	0	0	0	0	0	0	0.0184817	0.0157231	0.000600833	0	0.0213654	0	0	0.0150277	0.012615	0	0	0	-0.00996833	0.0147544	0.0214638	-0.0130844	0	0	0	0	0	0.0375065	0	-0.0113308	0
CEDIRANIB	0	0	0	0	-0.00623696	-0.0314973	0	0	0	-0.0269082	0	-0.00906964	0.00541156	-0.0162756	-0.0107357	0	-0.0188733	-0.0152156	0	0	0	0	0	0	0.0364054	0	-0.0154972	0	-0.0246818	-0.019375	0.0211669	0.0450061	0	-0.0204322	0.0123717	0.0214352	0	0	0.0140775	0	0	0	0	0	-0.0155619	0	-0.000171346	-0.012605	0.00781429
BRDK88742110	0	0	0	0	0	0	0.0358539	-0.0131636	0	0	-0.0169239	0	0.0198028	0.0175432	0.0337491	0.0344335	0.0367586	0	0	0	-0.0144911	0	0.0159441	0	0	0.0175525	0.0185064	0.0211772	0	0.0203356	0	-0.0149625	-0.0141342	0	0.0159723	0.00474364	-0.0303344	0	0.0146634	0	0.05859	0	0.0287962	0	0	-0.0140925	0.0149795	0.00283546	0
RALTITREXED	0.0564329	0	0	0	0.0172231	0	0	-0.0328194	0	0	-0.0128056	-0.0122487	0	-0.00980167	-0.0141394	0	0	-0.0279425	-0.0148273	0	0.0920625	0	0	0	0.0135233	0	0.00207583	0	0	0.0166975	0	0	0.000137308	-0.0135947	-0.0110144	0.0105413	0.0435453	0	0	0	-0.0200468	0	0	0	0.0551689	0	0.0277517	0	-0.0105533
QUIZARTINIB	0	-0.0412641	-0.0498983	0.0167261	0	0	0	-0.0116211	-0.0427133	0	0.0274575	-0.0310986	0	0	0.0400975	-0.0114031	-0.0367528	0	0.0115679	-0.00598667	0.0444204	0.0146281	-0.0111005	-0.0140764	0	0.0137519	-0.0168106	0	0.063996	0.0009875	-0.0145181	-0.0807243	-0.00595816	0	0	0	0.0172792	0.03952	-0.0174536	0	-0.0209343	0	0	0	0	0	0	0	0
OSI027	0	0	0	0	-0.0115966	0	-0.0220811	0	-0.00117083	0	-0.0203497	0	0.0201913	0	-0.0176117	-0.00322712	0	-0.0126765	0	0	0.0500771	0.00270808	0	0.0128807	0.0126192	-0.0160256	0	0	-0.00147553	0	-0.0443481	0.00954408	0.200542	0	-0.0147321	0	0	0.0292506	0.17991	0	0.0489125	0	-0.0204877	-0.00196077	-0.0386917	-0.00685464	0.0118721	0.0130927	-0.00870054
AMSACRINE	0.0608636	-0.0181756	0	0	-0.0493623	0.00988461	-0.0513542	-0.00522808	0	-0.0245518	-0.0188608	-0.011931	-0.0170156	-0.0489852	-0.0161212	-0.0168248	-0.133478	-0.032914	-0.0160206	0.0249106	0.0735614	-0.0261313	-0.00765788	-0.0708635	0.0422173	0.0478664	-0.0956369	-0.08057	-0.133309	0.0569483	-0.0189703	0.011971	0.0272335	-0.0175661	-0.0277529	-0.028546	0.0733028	-0.0237256	0.0111508	0.0915652	0	-0.0142909	0.0199246	-0.0100115	0.136989	-0.0178252	-0.0305135	0.127515	-0.067535
BOSUTINIB	0	0	0	0	0	0	0	0	0	0	0	0	0	0	0	0	0	0	0	0	0	0	0	0	0	0	0	0	0	0	0	0	0	0	0	0	0	0	0	0	0	0	0	0	0	0	0	0	0
[truncated: 169 more columns]

## Sheet: D.IorioPGX
	NINTEDANIB	ITRACONAZOLE	DEXAMETHASONE	NAVITOCLAX	AZD1480	AZACITIDINE	SU11274	FULVESTRANT	PRIMA1	DECITABINE	FLUVASTATIN	GOSSYPOL	METHOTREXATE	AGK2	AXITINIB	BORTEZOMIB	SJ172550	GMX1778	LAPATINIB	NUTLIN3	SARACATINIB	SIROLIMUS	SRT1720	TANDUTINIB	TG100115	TW37	VER155008	ZSTK474	CHLORAMBUCIL	CYCLOPHOSPHAMIDE	LOVASTATIN	CLOFARABINE	TAMOXIFEN	SIMVASTATIN	KI8751	PLX4720	WZ4002	BRIVANIB	ETOPOSIDE	THALIDOMIDE	AM580	LINSITINIB	KU0060648	GEMCITABINE	HLI373	PROCHLORPERAZINE	ERISMODEGIB	MST312	CD437
NINTEDANIB	1	0.593865	0.0223625	0.133642	-0.423515	0.185748	0.637668	0	-0.138112	0	0.402218	0.455093	0.128048	0.311163	0	0.387792	-0.23358	0.37432	-0.158628	0.392093	0.75681	0.664883	0.563585	0.619088	-0.15649	0.222757	0.69396	0.62471	0.15391	-0.37203	0.172205	0.19059	0.358045	0.48436	-0.173687	0.329072	0.645665	0.43525	0.423173	0.435475	0.52318	0.255837	0.690397	-0.139742	0.651415	0.577337	0.730187	0.475315	0.277502
ITRACONAZOLE	0.593865	1	0.329968	-0.114092	0.430793	0.477502	0.491488	0.486965	0	0.393655	0.142588	0.630267	0.164272	0.314868	0.203882	0.439078	0.199	-0.120365	0	0.140428	0.535625	0.504467	0.745918	0.444195	-0.42433	0.531698	0.564623	0.421903	-0.0216225	0.17166	-0.115748	0.4049	0	0.47286	0.446848	0.200857	0.666238	-0.172605	0.20149	0.34383	0	0.637633	0.588368	0.36617	0.19968	0.557042	0.538922	0.519648	0.55451
DEXAMETHASONE	0.0223625	0.329968	1	-0.15864	0.156378	0.00383	0.201975	0.187092	-0.175857	0.44686	-0.191612	0	0.507143	-0.39138	-0.162197	-0.26408	-0.465593	-0.389178	-0.525	-0.228605	0.333747	0.338867	-0.46752	0.348863	-0.661218	0	0.20119	-0.332295	0.602255	0.76136	-0.438685	-0.401492	-0.447025	0.359152	-0.134115	-0.341515	0	-0.456527	0.625683	0.16186	-0.406328	0.322775	-0.360308	-0.153165	-0.165145	0.428972	-0.192805	0.190082	-0.465137
NAVITOCLAX	0.133642	-0.114092	-0.15864	1	-0.381317	-0.14187	-0.115562	-0.1751	0.628707	0	0.160355	0.152558	0.316678	0.290005	0	0.144205	0	0.388933	-0.18346	0.613475	0.127885	0.376543	0.186617	-0.126922	-0.446215	0	0	0.374355	-0.448705	-0.143533	-0.363723	0.32393	0	0.336512	0	-0.188158	0	0	0.379125	0	0.185227	0	0.14556	0	0.397355	-0.279048	0.141615	0	0
AZD1480	-0.423515	0.430793	0.156378	-0.381317	1	0	0.375	0.397867	0.21739	0	-0.51064	0	-0.166447	0	0	-0.309125	0.164348	-0.39953	0.466263	-0.467115	-0.467705	-0.521352	-0.214075	-0.465722	0.193878	0	-0.54667	-0.437287	0.321597	0.579925	0.367482	-0.490208	0.2851	0	-0.433215	-0.175365	0.171093	0	-0.417137	0.0194675	-0.143267	-0.129592	-0.179465	0.366057	-0.574677	-0.141758	-0.584555	0	-0.322412
AZACITIDINE	0.185748	0.477502	0.00383	-0.14187	0	1	0.218523	0	0	-0.19499	0	0.762508	0	0	0.155565	0.55292	-0.408672	-0.351903	0	0.635115	0.0157925	0	0.191422	-0.29457	0	0.240437	0.182273	0.219865	0.0045025	-0.170925	0	0.642217	0	0	0.24913	0.683837	0.578415	0.19544	0.499908	0.15342	0.150743	0.139645	0.546493	0.220727	-0.226128	-0.203753	0.374598	0.489467	0.7256
SU11274	0.637668	0.491488	0.201975	-0.115562	0.375	0.218523	1	0.359775	-0.152915	-0.37582	0.29694	0.517815	0	0	0	0.03755	-0.14476	0.120512	0	0.193958	0.673965	0.50993	0.196988	0.505737	0.12682	0.23183	0.510745	0.467515	0.392005	0.11998	-0.020185	0	0.363685	0.318927	-0.31312	0.151485	0.564963	0.299275	0.18679	0	0.174755	0.18988	0.58394	0.4112	0.158092	0.524447	0.486755	0.392317	0.227325
FULVESTRANT	0	0.486965	0.187092	-0.1751	0.397867	0	0.359775	1	0.229717	0.308117	0	0.405747	0	-0.0085025	0	0.226853	0	0.147585	0	0.182842	0.362658	0.16986	-0.139722	-0.13974	0.114797	0.478448	0.221573	0.147795	0.301117	0.378783	0.34164	-0.154652	0.496302	0.4404	0	0.205737	0.488768	-0.217452	0	0.0266625	-0.35929	0.394587	0.165958	0.4596	-0.195555	0.387873	0	0.378682	0.173847
PRIMA1	-0.138112	0	-0.175857	0.628707	0.21739	0	-0.152915	0.229717	1	0	-0.179235	0.138263	0	0	0	0	0.511575	0	0.46814	0.47043	-0.195302	0	0.27155	-0.229118	0.395855	0.345195	-0.239352	-0.143203	-0.492677	0.182157	0	0	0.12613	0	-0.162578	-0.409185	0.17965	0	-0.124082	0.37307	0.338595	0.442267	0.0954075	0.29425	0	0	-0.200002	0.10984	0.140325
DECITABINE	0	0.393655	0.44686	0	0	-0.19499	-0.37582	0.308117	0	1	0.24077	0.209432	0.140462	0.56419	-0.151727	0.133543	-0.261755	-0.00613	-0.461792	0.195585	-0.172637	0	-0.176205	0.143622	-0.40519	0.195867	0.19305	-0.399518	0.156502	0.463823	-0.341265	0.19474	0	0.194788	0.4691	-0.134375	0	-0.282068	0.192763	0.612108	0	0	0.133285	0.317837	-0.261367	0.297667	0.289228	0.201362	0
FLUVASTATIN	0.402218	0.142588	-0.191612	0.160355	-0.51064	0	0.29694	0	-0.179235	0.24077	1	0.186395	0.152895	0.474027	-0.338962	0.17842	0.142978	-0.15819	-0.476123	0.130635	0.51897	0.548227	0.512663	0.248325	0	-0.305155	0.520057	0.416785	-0.302507	-0.439205	-0.202313	0.367355	0	0	0.210792	0.274307	0.396695	0	0.41891	0	0.136192	0.359783	0.183535	-0.160027	0.478665	0.430173	0.559362	-0.183583	0.173088
GOSSYPOL	0.455093	0.630267	0	0.152558	0	0.762508	0.517815	0.405747	0.138263	0.209432	0.186395	1	0.16702	0	0.149643	0.619293	0	-0.516097	0	0.566133	0.464838	0	0.516475	-0.146163	-0.209145	0.58459	0	0.476905	0.345008	0.162357	0.149218	0.693453	0.219213	0.391412	0.206118	0.550745	0.706878	0	0.4481	-0.262327	0.404382	0.215475	0.63881	0.530212	0	0.181333	0.15335	0.639332	0.748062
METHOTREXATE	0.128048	0.164272	0.507143	0.316678	-0.166447	0	0	0	0	0.140462	0.152895	0.16702	1	0	-0.197747	-0.156645	-0.182617	0.345353	-0.43488	0.361702	0.39243	0.499032	0.150753	0.168975	-0.550327	0.188328	0.257597	0.354552	0.181545	0.363702	-0.160757	0.13901	0	0.164087	0.293532	0	0	-0.305028	0.570412	0.213725	-0.256405	0.331285	0.11253	-0.17799	0.199797	0.0296225	0.2179	0.215737	0
AGK2	0.311163	0.314868	-0.39138	0.290005	0	0	0	-0.0085025	0	0.56419	0.474027	0	0	1	-0.34662	0.173762	-0.136667	0.385777	-0.165777	0.364752	0.357337	0.242695	0.409658	0.30826	0.15711	0.4055	0.173263	0.426255	0	-0.410405	-0.391533	0.47105	0	0	0.222422	0.393193	0.165603	0.127722	0.35912	0.68133	0.128947	0.205905	0.411558	-0.216918	0.216652	-0.171102	0.526338	0.193798	0.262273
AXITINIB	0	0.203882	-0.162197	0	0	0.155565	0	0	0	-0.151727	-0.338962	0.149643	-0.197747	-0.34662	1	0	0.176165	0	0.392225	0.312723	0	0	0.202758	0.0263525	0.28859	-0.17629	0.18319	-0.196827	0	-0.267302	0.375582	-0.499987	0.189535	-0.122085	0.34667	0.438445	0.414563	0.491152	-0.172435	0	0.420625	0	0	0	0.141662	-0.383675	0.169437	0	-0.351212
BORTEZOMIB	0.387792	0.439078	-0.26408	0.144205	-0.309125	0.55292	0.03755	0.226853	0	0.133543	0.17842	0.619293	-0.156645	0.173762	0	1	0.139118	0	0	0.475108	0.413282	0	0.508848	0.16091	-0.159098	0.58318	0.477258	0.186658	-0.254402	0.167008	-0.136735	0.529635	0.145473	0.46542	0.234572	0.624415	0.61327	0.147035	-0.173125	0.423737	0.349847	0.25259	0.591853	0.189977	0.245817	0.506068	0.456632	0.554813	0.607428
SJ172550	-0.23358	0.199	-0.465593	0	0.164348	-0.408672	-0.14476	0	0.511575	-0.261755	0.142978	0	-0.182617	-0.136667	0.176165	0.139118	1	0.136832	0.527365	-0.144765	-0.429045	-0.204137	0.624365	-0.461068	0.543998	0.4421	-0.4306	-0.41401	-0.337278	0.188167	0	0.371453	0.194433	-0.19145	0	-0.430185	0.383653	0.13956	-0.247065	0	0.381655	0.600375	-0.17768	0.399795	0.48593	-0.13381	-0.584468	0.185035	0.454157
GMX1778	0.37432	-0.120365	-0.389178	0.388933	-0.39953	-0.351903	0.120512	0.147585	0	-0.00613	-0.15819	-0.516097	0.345353	0.385777	0	0	0.136832	1	0.348687	0.578422	0.267537	0.622465	0.09442	0.499035	0.325405	0.68417	0.71474	0.395555	-0.18651	-0.457552	0.268713	0	-0.179852	0.13079	0.149352	0.42512	-0.389423	0.173283	-0.137225	-0.164977	-0.297127	0.360463	0.326823	-0.458825	0.43355	-0.210588	0.6418	0	0.42895
LAPATINIB	-0.158628	0	-0.525	-0.18346	0.466263	0	0	0	0.46814	-0.461792	-0.476123	0	-0.43488	-0.165777	0.392225	0	0.527365	0.348687	1	0	-0.423942	-0.554262	-0.337305	-0.414502	0.647525	0.280307	-0.49414	-0.199655	-0.132568	0.188165	0.60189	-0.230552	0.556388	0.130497	-0.207063	0	0.509452	0.184463	-0.627405	-0.470313	0	0	0	0.188617	-0.484525	0	-0.520737	0	0
NUTLIN3	0.392093	0.140428	-0.228605	0.613475	-0.467115	0.635115	0.193958	0.182842	0.47043	0.195585	0.130635	0.566133	0.361702	0.364752	0.312723	0.475108	-0.144765	0.578422	0	1	0.499868	0.5333	0.44886	0.17909	0	0.750132	0.512675	0.509502	-0.319182	-0.196955	-0.162947	0.707917	0.186337	0.47313	0.563837	0.549418	0.476325	0.297673	0.441738	0.316135	0.14041	0.15209	0.570523	0.241957	0	0	0.626715	0.576998	0.76061
SARACATINIB	0.75681	0.535625	0.333747	0.127885	-0.467705	0.0157925	0.673965	0.362658	-0.195302	-0.172637	0.51897	0.464838	0.39243	0.357337	0	0.413282	-0.429045	0.267537	-0.423942	0.499868	1	0.74421	0.597128	0.74983	-0.53181	0.495217	0.796103	0.63	0.30142	-0.176982	0.17218	0.16338	0.3176	0.621415	0.2059	0.147185	0.634715	0.173327	0.525185	0.35279	0	0.18941	0.742727	0	0.607407	0.700852	0.798077	0.413482	0.482397
SIROLIMUS	0.664883	0.504467	0.338867	0.376543	-0.521352	0	0.50993	0.16986	0	0	0.548227	0	0.499032	0.242695	0	0	-0.204137	0.622465	-0.554262	0.5333	0.74421	1	0.576477	0.580157	-0.235355	0.479643	0.834163	0.718418	0.280615	-0.428947	-0.35931	0	-0.33968	0.497937	0.139558	0	0.521175	-0.12912	0.55534	0.399622	0.116382	0.69875	0.615367	0	0.70933	0.208657	0.78013	0.180528	0
SRT1720	0.563585	0.745918	-0.46752	0.186617	-0.214075	0.191422	0.196988	-0.139722	0.27155	-0.176205	0.512663	0.516475	0.150753	0.409658	0.202758	0.508848	0.624365	0.09442	-0.337305	0.44886	0.597128	0.576477	1	0.227378	0	0.449135	0.625825	0.54498	-0.336253	-0.38509	0.154927	0.523267	0.321327	0.40808	0.48712	0.442692	0.69247	0	0	0.207487	0.24862	0.62813	0.587597	-0.121405	0.714165	0.2212	0.607045	0.356135	0.624202
TANDUTINIB	0.619088	0.444195	0.348863	-0.126922	-0.465722	-0.29457	0.505737	-0.13974	-0.229118	0.143622	0.248325	-0.146163	0.168975	0.30826	0.0263525	0.16091	-0.461068	0.499035	-0.414502	0.17909	0.74983	0.580157	0.227378	1	0	0.362935	0.691908	0.526998	0.144725	-0.475598	-0.172175	0.20552	0	0.199302	0.380135	0	0	0.395075	0.137497	0.35035	0	0	0.53216	-0.460983	0.494798	0.25518	0.7288	-0.015725	0.39785
TG100115	-0.15649	-0.42433	-0.661218	-0.446215	0.193878	0	0.12682	0.114797	0.395855	-0.40519	0	-0.209145	-0.550327	0.15711	0.28859	-0.159098	0.543998	0.325405	0.647525	0	-0.53181	-0.235355	0	0	1	0.1742	-0.528802	-0.172017	-0.282477	-0.45375	0.377673	0	0.562482	-0.430717	-0.424318	0	0.167563	0.62122	-0.648505	0	0.496623	0	0	-0.122728	-0.182828	-0.177865	0	0	0
TW37	0.222757	0.531698	0	0	0	0.240437	0.23183	0.478448	0.345195	0.195867	-0.305155	0.58459	0.188328	0.4055	-0.17629	0.58318	0.4421	0.68417	0.280307	0.750132	0.495217	0.479643	0.449135	0.362935	0.1742	1	0.247705	0.213115	0	0.158155	0.144303	0.78272	0.19556	0.223318	0.168852	0.478712	0.53908	0.248	0.410355	-0.14262	0	0.289832	0.59256	0.579723	0.1564	0	0.471005	0.853797	0.82815
VER155008	0.69396	0.564623	0.20119	0	-0.54667	0.182273	0.510745	0.221573	-0.239352	0.19305	0.520057	0	0.257597	0.173263	0.18319	0.477258	-0.4306	0.71474	-0.49414	0.512675	0.796103	0.834163	0.625825	0.691908	-0.528802	0.247705	1	0.551397	-0.0844325	-0.452767	0.167145	0	-0.354335	0.540048	0.163293	0.579335	0.53261	0.326365	0.532405	0.384745	-0.187835	0.63101	0.592712	-0.195015	0.70625	0.414397	0.829662	0.492347	0.238288
ZSTK474	0.62471	0.421903	-0.332295	0.374355	-0.437287	0.219865	0.467515	0.147795	-0.143203	-0.399518	0.416785	0.476905	0.354552	0.426255	-0.196827	0.186658	-0.41401	0.395555	-0.199655	0.509502	0.63	0.718418	0.54498	0.526998	-0.172017	0.213115	0.551397	1	0.303733	-0.46947	-0.177187	0.506108	0.162355	0.437877	0	0.22187	0.562488	0	0.456278	0.35485	0.151377	0.64278	0.686048	0.211248	0.575507	0	0.673743	0.22147	0.49049
CHLORAMBUCIL	0.15391	-0.0216225	0.602255	-0.448705	0.321597	0.0045025	0.392005	0.301117	-0.492677	0.156502	-0.302507	0.345008	0.181545	0	0	-0.254402	-0.337278	-0.18651	-0.132568	-0.319182	0.30142	0.280615	-0.336253	0.144725	-0.282477	0	-0.0844325	0.303733	1	0.579708	0.297602	-0.220995	0.262607	0	-0.187197	-0.3467	0.189475	0	0.370935	-0.13559	-0.265993	0	0.315677	0.137807	-0.09871	0	0	0.19895	0
CYCLOPHOSPHAMIDE	-0.37203	0.17166	0.76136	-0.143533	0.579925	-0.170925	0.11998	0.378783	0.182157	0.463823	-0.439205	0.162357	0.363702	-0.410405	-0.267302	0.167008	0.188167	-0.457552	0.188165	-0.196955	-0.176982	-0.428947	-0.38509	-0.475598	-0.45375	0.158155	-0.452767	-0.46947	0.579708	1	-0.150945	-0.540837	0	0	-0.108525	-0.220875	0	-0.50596	0.158807	-0.167947	-0.40982	0	-0.42025	0.3971	-0.528408	0	-0.633223	0.365457	-0.388228
LOVASTATIN	0.172205	-0.115748	-0.438685	-0.363723	0.367482	0	-0.020185	0.34164	0	-0.341265	-0.202313	0.149218	-0.160757	-0.391533	0.375582	-0.136735	0	0.268713	0.60189	-0.162947	0.17218	-0.35931	0.154927	-0.172175	0.377673	0.144303	0.167145	-0.177187	0.297602	-0.150945	1	-0.142898	0.433645	0.322995	-0.17042	0	0.44138	0.164045	-0.46414	-0.427837	-0.159497	0	0.406775	0.43783	-0.146537	0.136683	-0.324755	0.156525	0
CLOFARABINE	0.19059	0.4049	-0.401492	0.32393	-0.490208	0.642217	0	-0.154652	0	0.19474	0.367355	0.693453	0.13901	0.47105	-0.499987	0.529635	0.371453	0	-0.230552	0.707917	0.16338	0	0.523267	0.20552	0	0.78272	0	0.506108	-0.220995	-0.540837	-0.142898	1	0.136093	0	0.493215	0.2064	0.479467	0.156825	0.612112	0.187345	0.564793	0.369365	0.617783	0.661138	0	-0.17994	0.27121	0.710908	0.87353
TAMOXIFEN	0.358045	0	-0.447025	0	0.2851	0	0.363685	0.496302	0.12613	0	0	0.219213	0	0	0.189535	0.145473	0.194433	-0.179852	0.556388	0.186337	0.3176	-0.33968	0.321327	0	0.562482	0.19556	-0.354335	0.162355	0.262607	0	0.433645	0.136093	1	0.439323	0	0	0.598163	0.459493	-0.422113	-0.20082	0.478023	0.184735	0.491918	0.389033	-0.176038	0.54014	0.125463	0	0.399062
SIMVASTATIN	0.48436	0.47286	0.359152	0.336512	0	0	0.318927	0.4404	0	0.194788	0	0.391412	0.164087	0	-0.122085	0.46542	-0.19145	0.13079	0.130497	0.47313	0.621415	0.497937	0.40808	0.199302	-0.430717	0.223318	0.540048	0.437877	0	0	0.322995	0	0.439323	1	0.34042	0.194587	0.613255	0	0.402338	0.19041	-0.32918	0.39377	0.554582	0.354602	0.396253	0.528395	0.527465	0.475608	0.211615
KI8751	-0.173687	0.446848	-0.134115	0	-0.433215	0.24913	-0.31312	0	-0.162578	0.4691	0.210792	0.206118	0.293532	0.222422	0.34667	0.234572	0	0.149352	-0.207063	0.563837	0.2059	0.139558	0.48712	0.380135	-0.424318	0.168852	0.163293	0	-0.187197	-0.108525	-0.17042	0.493215	0	0.34042	1	0.485662	0	0	0.171582	0.0064	0	-0.346197	0.18201	-0.167045	0	0	0.202753	0.179035	0.46796
PLX4720	0.329072	0.200857	-0.341515	-0.188158	-0.175365	0.683837	0.151485	0.205737	-0.409185	-0.134375	0.274307	0.550745	0	0.393193	0.438445	0.624415	-0.430185	0.42512	0	0.549418	0.147185	0	0.442692	0	0	0.478712	0.579335	0.22187	-0.3467	-0.220875	0	0.2064	0	0.194587	0.485662	1	0.303882	0.210925	0.15654	0.30142	-0.338958	0.186895	-0.178907	0	0	0.160477	0.466977	0.228038	0.51142
WZ4002	0.645665	0.666238	0	0	0.171093	0.578415	0.564963	0.488768	0.17965	0	0.396695	0.706878	0	0.165603	0.414563	0.61327	0.383653	-0.389423	0.509452	0.476325	0.634715	0.521175	0.69247	0	0.167563	0.53908	0.53261	0.562488	0.189475	0	0.44138	0.479467	0.598163	0.613255	0	0.303882	1	0.156455	0	0	0.1642	0.66106	0.700963	0.557728	0.237775	0.63049	0.51182	0.646548	0.599915
BRIVANIB	0.43525	-0.172605	-0.456527	0	0	0.19544	0.299275	-0.217452	0	-0.282068	0	0	-0.305028	0.127722	0.491152	0.147035	0.13956	0.173283	0.184463	0.297673	0.173327	-0.12912	0	0.395075	0.62122	0.248	0.326365	0	0	-0.50596	0.164045	0.156825	0.459493	0	0	0.210925	0.156455	1	-0.271778	-0.11063	0.631182	0.201825	0.508502	-0.474332	0.224073	0.177235	0.562257	0	0.431843
ETOPOSIDE	0.423173	0.20149	0.625683	0.379125	-0.417137	0.499908	0.18679	0	-0.124082	0.192763	0.41891	0.4481	0.570412	0.35912	-0.172435	-0.173125	-0.247065	-0.137225	-0.627405	0.441738	0.525185	0.55534	0	0.137497	-0.648505	0.410355	0.532405	0.456278	0.370935	0.158807	-0.46414	0.612112	-0.422113	0.402338	0.171582	0.15654	0	-0.271778	1	0.488963	0	0.168373	0.197862	0.194485	0.226045	0	0.506185	0.259525	0.480225
THALIDOMIDE	0.435475	0.34383	0.16186	0	0.0194675	0.15342	0	0.0266625	0.37307	0.612108	0	-0.262327	0.213725	0.68133	0	0.423737	0	-0.164977	-0.470313	0.316135	0.35279	0.399622	0.207487	0.35035	0	-0.14262	0.384745	0.35485	-0.13559	-0.167947	-0.427837	0.187345	-0.20082	0.19041	0.0064	0.30142	0	-0.11063	0.488963	1	0.202845	0.41127	0.437798	-0.360513	0	-0.184163	0.42181	0	0.174967
AM580	0.52318	0	-0.406328	0.185227	-0.143267	0.150743	0.174755	-0.35929	0.338595	0	0.136192	0.404382	-0.256405	0.128947	0.420625	0.349847	0.381655	-0.297127	0	0.14041	0	0.116382	0.24862	0	0.496623	0	-0.187835	0.151377	-0.265993	-0.40982	-0.159497	0.564793	0.478023	-0.32918	0	-0.338958	0.1642	0.631182	0	0.202845	1	0.236665	0.509375	-0.491372	0.506718	0.357735	0.448503	-0.163158	0.564462
LINSITINIB	0.255837	0.637633	0.322775	0	-0.129592	0.139645	0.18988	0.394587	0.442267	0	0.359783	0.215475	0.331285	0.205905	0	0.25259	0.600375	0.360463	0	0.15209	0.18941	0.69875	0.62813	0	0	0.289832	0.63101	0.64278	0	0	0	0.369365	0.184735	0.39377	-0.346197	0.186895	0.66106	0.201825	0.168373	0.41127	0.236665	1	0.612522	0.217888	0.599213	0	0.23845	0.518362	0.490347
KU0060648	0.690397	0.588368	-0.360308	0.14556	-0.179465	0.546493	0.58394	0.165958	0.0954075	0.133285	0.183535	0.63881	0.11253	0.411558	0	0.591853	-0.17768	0.326823	0	0.570523	0.742727	0.615367	0.587597	0.53216	0	0.59256	0.592712	0.686048	0.315677	-0.42025	0.406775	0.617783	0.491918	0.554582	0.18201	-0.178907	0.700963	0.508502	0.197862	0.437798	0.509375	0.612522	1	0	0.281873	0.499985	0.684895	0.505018	0.731718
GEMCITABINE	-0.139742	0.36617	-0.153165	0	0.366057	0.220727	0.4112	0.4596	0.29425	0.317837	-0.160027	0.530212	-0.17799	-0.216918	0	0.189977	0.399795	-0.458825	0.188617	0.241957	0	0	-0.121405	-0.460983	-0.122728	0.579723	-0.195015	0.211248	0.137807	0.3971	0.43783	0.661138	0.389033	0.354602	-0.167045	0	0.557728	-0.474332	0.194485	-0.360513	-0.491372	0.217888	0	1	-0.212925	0	-0.561265	0.525565	0.551505
HLI373	0.651415	0.19968	-0.165145	0.397355	-0.574677	-0.226128	0.158092	-0.195555	0	-0.261367	0.478665	0	0.199797	0.216652	0.141662	0.245817	0.48593	0.43355	-0.484525	0	0.607407	0.70933	0.714165	0.494798	-0.182828	0.1564	0.70625	0.575507	-0.09871	-0.528408	-0.146537	0	-0.176038	0.396253	0	0	0.237775	0.224073	0.226045	0	0.506718	0.599213	0.281873	-0.212925	1	0.171898	0.67015	0	0
PROCHLORPERAZINE	0.577337	0.557042	0.428972	-0.279048	-0.141758	-0.203753	0.524447	0.387873	0	0.297667	0.430173	0.181333	0.0296225	-0.171102	-0.383675	0.506068	-0.13381	-0.210588	0	0	0.700852	0.208657	0.2212	0.25518	-0.177865	0	0.414397	0	0	0	0.136683	-0.17994	0.54014	0.528395	0	0.160477	0.63049	0.177235	0	-0.184163	0.357735	0	0.499985	0	0.171898	1	0.425148	0	0
ERISMODEGIB	0.730187	0.538922	-0.192805	0.141615	-0.584555	0.374598	0.486755	0	-0.200002	0.289228	0.559362	0.15335	0.2179	0.526338	0.169437	0.456632	-0.584468	0.6418	-0.520737	0.626715	0.798077	0.78013	0.607045	0.7288	0	0.471005	0.829662	0.673743	0	-0.633223	-0.324755	0.27121	0.125463	0.527465	0.202753	0.466977	0.51182	0.562257	0.506185	0.42181	0.448503	0.23845	0.684895	-0.561265	0.67015	0.425148	1	0.399753	0.529338
MST312	0.475315	0.519648	0.190082	0	0	0.489467	0.392317	0.378682	0.10984	0.201362	-0.183583	0.639332	0.215737	0.193798	0	0.554813	0.185035	0	0	0.576998	0.413482	0.180528	0.356135	-0.015725	0	0.853797	0.492347	0.22147	0.19895	0.365457	0.156525	0.710908	0	0.475608	0.179035	0.228038	0.646548	0	0.259525	0	-0.163158	0.518362	0.505018	0.525565	0	0	0.399753	1	0.716178
CD437	0.277502	0.55451	-0.465137	0	-0.322412	0.7256	0.227325	0.173847	0.140325	0	0.173088	0.748062	0	0.262273	-0.351212	0.607428	0.454157	0.42895	0	0.76061	0.482397	0	0.624202	0.39785	0	0.82815	0.238288	0.49049	0	-0.388228	0	0.87353	0.399062	0.211615	0.46796	0.51142	0.599915	0.431843	0.480225	0.174967	0.564462	0.490347	0.731718	0.551505	0	0	0.529338	0.716178	1
PRIMA1MET	0.569403	0.528458	0	0.166453	-0.586525	0	0	-0.40152	-0.18247	0	0.536475	0.17594	0.38251	0.347675	0	0.545083	0.23319	0.18519	-0.641365	0.204418	0.62161	0.731555	0.79883	0.47383	-0.451472	0.138673	0.74955	0.589268	-0.19151	-0.44902	-0.161543	0	-0.408745	0.41046	0.5507	0.509387	0.536467	0	0.497872	0.18723	0.381628	0.600237	0.497617	-0.25481	0.769308	0	0.731487	0.308582	0.194048
TIPIFARNIBP2	0.569325	0.549523	-0.567397	0	0	0	0.436572	0.392035	0.167302	0	0.174162	0	-0.15175	0.38359	0.385952	0.483935	0.62456	0.786887	0.615417	0.601638	0.626115	0.565547	0.671377	0.468533	0.539555	0.686998	0.691797	0.467455	-0.145995	-0.16086	0.521295	0.190565	0.544725	0.386423	0.177845	0.276065	0.647887	0.444225	-0.452153	-0.176503	0.16057	0.59162	0.622195	0.12323	0.482455	0.247867	0.622565	0.48421	0.631413
KU0063794	0.516273	0.540168	0.343463	0.413835	-0.1353	0.173492	0.517532	0.188128	0.184465	-0.169245	0.188358	0.504212	0.387682	-0.146187	-0.195238	0.360353	-0.158803	-0.28281	-0.202758	0.46538	0.498167	0.709577	0	0	0	0.238648	0.22931	0.820882	0.178382	0	-0.13075	-0.16983	0.193445	0.449578	-0.454107	0	0.65371	-0.380532	0.23876	0.386947	0	0.742823	0.652852	0.551855	0.232343	0.227327	0.251575	0.404975	0.195055
GDC0879	0.481853	0	-0.345533	0.292727	-0.13022	0.47394	0.46211	0.432808	0.427598	0	0.186973	0.441578	0.32789	0.461618	0.376615	0.537095	0	0.472222	0.45156	0.578715	0.54339	0.46929	0.208572	0	0.120292	0.52488	0.58876	0.166765	-0.16645	0	0.152477	0	0	0.221975	0.163798	0.465068	0.499063	0.444613	0.165325	0.390625	0.142473	0.438518	0.531892	0	0.38519	0.212035	0.55667	0	0.239838
UNC0321	0.263062	-0.139373	0.470573	0.380352	-0.642875	0	0.325257	0.153892	-0.203522	0.374538	0.422602	0.151355	0.407403	0.158043	-0.437872	0	-0.623698	0.154885	-0.489362	0.516282	0.60605	0.61682	-0.189455	0.516118	-0.562065	-0.130233	0.506507	0.50349	0.15246	-0.425428	-0.493102	0.326875	-0.17927	0.524665	0	0.18486	-0.109332	0	0.631375	0	-0.168813	-0.139767	0.181232	-0.13457	0.47016	0.464548	0.68017	0	-0.151207
EX527	0.354048	0.360687	0	0.421955	-0.345225	0.411843	0.14694	-0.15027	0.357655	0.433698	0.379472	0.442673	0.148638	0.38598	0.199135	0.449525	0.19605	-0.1612	-0.224702	0.435453	0	0.201195	0.493922	-0.351195	-0.182663	0.45837	0.205638	-0.353135	-0.0374475	0	-0.326043	0.486245	-0.155122	0.352045	0.468165	0.212885	0.142137	0.33827	0.50438	0.41733	0.580427	0.276853	0.218885	0	0.503713	0	0.177787	0.553837	0.46625
VORINOSTAT	0.587233	0.513025	-0.18208	0	-0.188633	0.431582	0.53148	0.408488	-0.0524725	0.177473	0.295045	0.58912	-0.13467	0.424017	0	0.5314	0.202472	0.196313	0	0.418168	0.62846	0.18988	0.509032	0.419165	0	0.571495	0.470898	0.397867	0	-0.200065	0.373487	0.579148	0.528493	0.52241	-0.177808	-0.472975	0.600745	0.437702	0.415045	0.17013	0.394137	0.467203	0.817495	0.393458	0.258178	0.562767	0.52739	0.500795	0.715113
PF750	0.510983	0.749502	0.135818	0	0	0.63643	0.480517	0.413645	0.18385	0.206852	0	0.738545	0.169285	0.189883	0.507493	0.622315	0	0	0	0.689612	0.51234	0.241413	0.606975	0	-0.168495	0.702125	0.529365	0	0.04613	0.1558	0	0.64338	0.534115	0.548053	0.533957	0.614483	0.748065	0.15851	0.208065	0.327093	0.41496	0.6044	0.542477	0.448458	0	0.187543	0.551608	0.716108	0.720442
CAY10618	0.493455	0.71408	0	0	-0.12221	0.67562	0.489245	0.509672	0	0.475957	0.385015	0.760583	0.18686	0.208025	0.41955	0.63789	-0.060815	0.119642	0	0.720518	0.54723	0.252588	0.577287	0.207035	0	0.76204	0.507607	0.254555	0.0696625	0.159732	0	0.707167	0.480955	0.202475	0.541813	0.620907	0.750315	0.331632	0.266433	0.0180225	0.187425	0.241482	0.604742	0.50236	0	0.515508	0.564488	0.725927	0.776415
VELIPARIB	0.677273	0.221122	0	0.168073	-0.608402	0.4094	0.15878	-0.39233	-0.42097	0.155335	0.420063	0.171905	0.293065	0.39887	0.22354	0.449468	-0.6104	0.496325	-0.637683	0.51146	0.536925	0.629285	0.62286	0.559682	0	-0.139987	0.724753	0.605548	-0.114502	-0.580808	-0.238715	0.541843	-0.324728	0.384742	0.402008	0.496978	0	0.558582	0.49202	0.420038	0.647883	0.253097	0.662898	-0.56311	0.685473	0	0.854788	0	0.334413
ALVOCIDIB	0.634807	0	0.163807	0.473985	-0.554408	-0.219925	0.16936	-0.170503	-0.143373	-0.143932	0.499825	-0.19394	0.432553	0.185642	0	0.178565	-0.38596	0.468855	-0.499738	0	0.598208	0.670828	0.41817	0.466913	-0.440777	0	0.617877	0.21342	-0.104353	-0.396742	-0.255655	0	-0.18592	0	-0.210938	0	0.159823	0.40977	0.541715	0	0.467768	0.137917	0.222545	-0.289907	0.74576	0.194855	0.676077	0	0
RG108	0.652628	0.464768	-0.426762	0	-0.601542	0.407152	0.353832	-0.18731	-0.204327	-0.13902	0.522425	0.177182	0.36329	0.464185	0	0.455442	-0.170838	0.645192	-0.53841	0.531593	0.624243	0.684832	0.712377	0.610645	0.191818	0	0.813187	0.64255	-0.165552	-0.649617	-0.1279	0.469593	0	0	0.375348	0.515452	0.188927	0.54762	0.383522	0.21302	0.51682	0.6363	0.615932	-0.519765	0.728745	0	0.843453	0	0.56635
TRIFLUOPERAZINE	0.549198	0.613395	-0.527795	0	0.129765	0.547172	0.621818	0.191025	0	-0.22838	0.171497	0.62816	0	0	-0.14565	0.19623	0.222155	0.229213	0.550318	0.59847	0.687333	0.347598	0.627132	0.549907	0.49793	0.666445	0.1938	0.54863	0.179693	0	0.500513	0.518197	0.669053	0	0	0.228005	0.73314	0.178465	-0.201533	-0.31393	-0.144363	0	0.684377	0.497443	0	0.298878	0.57833	0.54402	0.691438
DOXORUBICIN	0.674813	0	0.41546	0.404743	-0.5829	0	0.21048	0	0	0	0.52136	-0.17815	0.201448	0.222518	0	0.16068	-0.181045	0	-0.581935	0	0.653535	0.697667	0.43265	0.466235	-0.553593	-0.191955	0.655593	0.23958	-0.133142	-0.342085	-0.20303	0	-0.222493	0.451445	0	0	0.210698	0.32819	0.600542	0.399825	0.462828	0.182385	0.279392	-0.23663	0.786695	0.24293	0.67425	0	0
AC55649	0.2082	0.201112	0.57767	0	-0.35716	0.489818	0.359652	0.423758	-0.35603	0.448805	0.216255	0.541855	0.347903	0.157455	-0.110533	0	-0.750027	-0.135837	-0.419598	0.525025	0.605773	0.52096	-0.232955	0.496198	-0.67743	0.212188	0.48636	0.43343	0.201155	0	-0.414272	0.122807	-0.151408	0.546242	0.166275	0.405445	0.0346525	-0.147893	0.588843	0.135962	-0.460845	0	0.385955	0	-0.143973	0.477645	0.616938	0.140187	0
PACLITAXEL	0.166217	-0.165933	0.16569	-0.515123	-0.16147	0.480953	0.366425	0.416385	-0.497055	0.176508	0.274187	0.39992	0.156053	0.359843	-0.0217075	0	-0.631543	0	0	0.38048	0.451553	0	-0.433632	0.515127	0.137483	0.318047	0.280855	0.21022	0.41639	-0.397643	0.21576	0.342345	0.191578	0.165565	0.155943	0.461743	0.339413	0	0.310138	-0.020785	0	-0.47908	0.395885	-0.211058	-0.410683	0	0.572257	0	0.182058
IBRUTINIB	0.535837	-0.106658	0	0.26704	-0.465392	0.17282	0.175593	-0.360347	0.30097	-0.211078	0.220225	0.443263	0.131905	-0.42526	0	0.19054	0.0891125	-0.480258	-0.10898	0.138785	0.54711	0.251455	0.40032	0.201932	-0.185815	-0.24157	0.177368	0.184275	-0.146732	-0.190803	-0.149292	0	0	0.371198	-0.14701	-0.20364	0.487878	0.416013	0.156482	-0.216828	0.387025	0.31834	0.473143	0	0.530423	0.530883	0.395628	-0.377227	0
OUABAIN	0	0.474892	-0.153812	0.144448	-0.364635	0.497262	0.20194	-0.122967	-0.401672	0.502018	0.374213	0.564237	0.43371	0.468548	-0.21586	0.47146	-0.205052	0.21511	-0.575215	0.634203	0.46607	0.552105	0.469265	0.479915	-0.147448	0.597415	0.266657	0.51536	0.136953	-0.39863	-0.37725	0.72208	-0.177673	0	0.2235	0.367395	0.0250475	-0.184647	0.539295	0.38615	0.331788	0.44702	0.642312	0.214515	0.16441	0	0.571268	0.51825	0.755792
TEMSIROLIMUS	0.710782	0.710562	-0.186842	0	-0.425005	0.528855	0.445047	0.329668	-0.154973	-0.193708	0.59054	0.602792	0.374735	0.375225	0.15485	0.560102	0	0.446808	-0.25262	0.576405	0.688527	0.835295	0.788415	0.517543	0	0.553165	0.80033	0.769698	0	-0.519532	0	0.297725	0.363415	0.590675	0.238233	0.720908	0.782482	0.389235	0.471363	0.420208	0.469555	0.772425	0.691963	-0.17309	0.747045	0.423223	0.803085	0.579192	0.608187
APICIDIN	0.361308	0.391197	0.184847	0.11479	-0.162995	0.13925	0	-0.130495	0.157848	0.586475	0.371972	0.182895	0.383678	0.60795	-0.399263	0.398637	0	0.311987	-0.51395	0.368428	0.3851	0.45108	0	0.166573	-0.193603	0.201143	0.352803	0.326365	-0.13357	-0.13017	-0.363748	0.23613	-0.348177	0.279597	0.177905	-0.0276825	-0.18527	-0.137275	0.431362	0.666345	0.16426	0.446613	0.465483	0.157458	0.218055	0.162945	0.34538	0.17846	0.214012
VINCRISTINE	0	0	0	-0.3079	0.44218	-0.203673	0	-0.315667	0.403232	0.458913	0	0	-0.156167	0	0.404127	0	0.42134	0	0.388115	0	-0.350112	-0.405625	-0.133307	-0.19829	0.51959	0.172918	-0.222917	-0.449323	0	0.380805	0.157395	0	0.139565	-0.35241	0	0.188612	-0.115492	0.15555	-0.362318	0.315953	0.533585	0.182627	0	0.16386	-0.40311	0	-0.422428	0	0.45468
MANUMYCINA	-0.15506	0.423283	0.155485	0	0.551488	0.529833	0.190782	0.399323	0.13314	0.418857	-0.151523	0.567245	-0.34703	0	0.392317	0.23666	-0.32664	-0.479208	0	0	-0.429397	-0.55115	-0.38277	-0.134825	0.34638	0.534925	-0.424608	-0.250225	0.313765	0.484337	0.149907	0.497432	0	0	0	0	0.182592	0.407025	-0.17147	0.233285	0.409023	-0.172068	0.127477	0.545273	-0.275945	0.181095	-0.503567	0.20377	0.611873
TRAMETINIB	-0.173895	-0.297637	0.22287	-0.120983	0.573253	0	0.3523	0.35003	0.22343	0.376468	-0.223857	0	-0.362725	-0.382945	-0.14244	-0.251567	0.327815	-0.426353	0.49783	-0.16059	-0.45286	-0.573375	-0.535913	-0.521085	0.313135	0	-0.576865	-0.547898	0.351718	0.600692	0	-0.222032	0	0	-0.36445	-0.25916	-0.163565	-0.341012	-0.315893	-0.0037025	-0.2711	-0.147393	-0.437415	0.475533	-0.573442	0.389455	-0.654035	0	-0.161078
CICLOPIROX	-0.30286	0	-0.211567	-0.312283	0.42083	0.158495	0.299162	0.445167	0.149952	0.151202	-0.339452	0.507015	-0.367847	0.317785	-0.318472	0.183103	0.50106	0.199195	0.572575	0.47832	-0.172027	-0.207652	0.169745	0	0.494535	0.799435	-0.353835	-0.194093	0	0	0.347917	0.689617	0	0	0	0.16776	0.195098	0.133735	-0.228923	0	-0.154408	0.150143	0.170505	0.51578	-0.216298	0	-0.235127	0.758938	0.682567
TENIPOSIDE	0.40433	-0.163882	0	-0.162215	-0.439665	0.564767	0.178375	0.144217	-0.185355	0	0.330867	0.521585	0.184205	0.186455	0	0.40014	0	0.358328	0	0.610315	0.277952	0.185902	0.45677	0	0	0.647165	0.27337	0.420353	0.148385	-0.404965	0.336782	0.746178	0	0.184685	0	0.158433	0.43944	0.409385	0.632068	0.349417	0.203327	0.18401	0.5367	0.530767	0.25237	0.188355	0.27311	0.613235	0.736332
SN38	0.187142	0.210383	-0.115398	0	0	0.58496	0.510395	0.416885	-0.10559	-0.209135	-0.13124	0.539837	0.135515	0.159785	-0.373445	0.157515	0.03572	0.382195	0	0.58838	0.3944	0.190585	0	0	0	0.70242	0.195158	0.23217	0.403622	-0.18591	0	0.663837	0	0.21796	0	0.18771	0.531155	-0.34446	0.480055	-0.314597	-0.51269	0	0.47438	0.686322	0.2229	-0.17172	0.188378	0.659253	0.651157
TGX221	0.748402	0.60056	0.152625	0	-0.255	0.4983	0.582605	0.378625	0.14374	0	0.421737	0.553735	0.152237	0.458285	-0.17263	0.38565	-0.240627	-0.092625	-0.208838	0.439852	0.656135	0.62623	0.555535	0.54774	0	0.491557	0.548685	0.678365	0.394135	-0.154328	-0.137403	0.51157	0.407222	0.544053	0	0.137942	0.634548	0.1621	0.503962	0.431655	0.49735	0.670325	0.726095	0.028695	0.262385	0.524312	0.656567	0.477268	0.551397
AFATINIB	0.587105	0.542107	0.42827	-0.19747	0	0.537608	0.56219	0.467228	0.147285	0.177635	0	0.618082	0	0.184188	0.331475	0.492688	-0.149413	0	0	0.461265	0.635125	0	0.423625	0.43884	0	0	0.558688	0	0.400682	0.371325	0.35889	-0.42337	0.472452	0.545395	0.472328	0.324215	0.678843	0.178138	0	0.162472	0	0.515475	0.504395	0	0	0.570102	0.509895	0.49611	0
SALERMIDE	0.218652	0.601835	-0.1769	0.351338	-0.158025	0.77458	0.257703	0.432248	0.149133	0.226705	0.33288	0.796585	0.185165	0.211533	0.22257	0.63812	0.332717	-0.150445	0	0.738085	0.49163	0.391867	0.574902	0.165415	0.163933	0.72604	0.25301	0.50368	-0.153363	-0.118243	0	0.757737	0.233025	0.247592	0.554508	0.612055	0.719993	0.379063	0.43477	0.232997	0.427378	0.538227	0.655075	0.26491	0	0	0.539928	0.680255	0.8666
KU60019	0.456572	0.292152	0.199398	0	0.44536	0.462585	0.59934	0.55131	0.183965	0	-0.128552	0.599703	0	0	-0.253688	0.372148	0	0	0.218872	0.488758	0.541125	0.371225	0.169403	0	0	0.537425	0.187108	0.415407	0.337863	0.481803	0.436742	0.151902	0.235555	0.491345	0.18077	0	0.64418	0	0	-0.0184025	-0.198827	0.235357	0.537447	0.22028	-0.435868	0.499827	0.15447	0.548885	0
RITA	0.16311	0.509153	0.154475	0	0	0.583392	0.402795	0.18829	0.195527	0	0.304092	0.549725	0.138635	0.331437	0.444468	0.524855	0.59743	0.353585	0	0.559192	0.478608	0	0.502825	-0.11092	0.134905	0.683655	0.45473	0	0	0.137472	0	0.625988	0.192568	0.174035	0.537887	0.577815	0.55617	0.164343	0.199	0.17529	0.129332	0.538523	0.461895	0.523745	0.182058	0	-0.13475	0.659112	0.65264
TUBASTATINA	0.694115	0.611385	-0.371103	0	0	0.528297	0.623505	0.423822	0.177877	0	0.413828	0.63698	0.167348	0.419515	-0.315115	0.477007	0.334012	0.358945	0	0.583435	0.63815	0.527367	0.56183	0.399995	0	0.712433	0.546435	0.551517	0.176762	-0.38618	0.149872	0.668488	0.521277	0.527605	0	0.176808	0.710732	0.413092	0.239445	0.322902	0.382055	0.58922	0.767023	0.557057	0.269912	0.488592	0.651095	0.58722	0.71585
OLAPARIB	0.482453	0.46357	-0.191725	0.198132	-0.231588	0.500158	0.384018	0.164367	0	0	0	0.5198	0.363318	0.399005	-0.33525	0.53845	0	0.655715	0	0.742053	0.540502	0.56047	0.548315	0.19987	0.143905	0.781225	0.616947	0.561695	0.153597	-0.46862	0	0.753058	0	0.48902	0.472693	0.551248	0.59865	0.375292	0.465278	0.158625	0.323582	0.53244	0.678388	0.453265	0	0	0.690813	0.64783	0.764455
GSK1059615	0.647725	0	-0.190095	0.465992	-0.525543	0.212193	0.212285	0	0.176753	-0.231885	0.560505	0.21095	0.412457	0.45893	-0.192972	0.558255	0.35994	0.345685	-0.369287	0.563987	0.649913	0.749762	0.71226	0.174805	-0.144707	0.237462	0.607082	0.741642	-0.13929	-0.26274	0	0.50614	0.130378	0.459965	0.319072	0.397085	0.658343	0	0.438625	0.190793	0.356575	0.68999	0.693873	0.152122	0.730082	0.236217	0.654018	0.252465	0.46829
FORETINIB	0.773305	0.659863	0.48334	0	0.155435	0.249345	0.720897	0.455795	0	0	0.352677	0.587605	0.15829	0	0	0.255458	-0.193755	0	0.124577	0.225525	0.79245	0.669935	0.535297	0.564495	-0.49501	0.22395	0.752062	0.588175	0.396325	0.35638	0.346683	-0.239297	0.436685	0.607698	0	0.200008	0.726953	-0.118722	0.243672	0.411282	0.11696	0.599143	0.63094	0.188337	0.240287	0.689135	0.663512	0.509278	0.197765
LE135	0.367053	0.54768	0	0	0.291978	0.709178	0.338795	0.363633	0.403222	-0.128812	-0.27225	0.725143	0.154945	0.132798	0.188557	0.643012	0.505452	-0.180055	0.192653	0.694017	0	0	0.508842	-0.244105	0.142363	0.790255	0	0	0	0.422532	0	0.79621	0	0.198595	0.23113	0.603178	0.704035	0.149565	0.273058	0.353882	0.48011	0.498192	0.545473	0.618605	0	0	-0.05306	0.76136	0.854128
DABRAFENIB	0	-0.41795	-0.438835	0	-0.156725	-0.63907	-0.334307	0	-0.148452	0.171208	0.16724	-0.54272	0.155955	0	0	-0.248452	-0.132805	0.351243	-0.256315	0	0.152837	0	-0.213103	0.225268	-0.161922	-0.187798	-0.138857	0	0.145918	-0.418932	-0.45028	0	0	-0.442308	0	-0.667647	-0.628027	0	0	0.305428	0.14261	-0.531715	-0.288465	-0.501507	0	0	0.162073	-0.188958	0
AT7867	0.701847	0.67694	0	0.21788	-0.39679	0.462572	0.619457	0	0	-0.147932	0.44149	0.598455	0.340907	0.402828	-0.348495	0.538793	0	0.139192	-0.505938	0.532717	0.690527	0.658285	0.702095	0.591603	-0.36708	0.55758	0.614245	0.733875	0.308217	-0.418683	-0.39463	0.540025	0	0.49024	0.300775	0.312673	0.61842	0.12631	0.48919	0.467087	0.370025	0.53193	0.722158	0.191192	0.553427	0.528927	0.655613	0.535928	0.60772
NVPBEZ235	0.467205	0.262875	-0.385983	0.37387	0.282565	0.274392	0.496457	0.04331	0	0	0.447285	0.553113	0.162655	0.358963	-0.188812	0.453535	0	0	0	0.401512	0.403045	0.49573	0.54716	0.133425	0	0.477005	0.226717	0.705692	-0.15015	-0.459143	0	0.224763	0	0.181333	0	-0.213627	0.486478	0	0	0.168132	0	0.492855	0.622777	0.204775	0.280655	0	0.26737	0.485365	0.55962
TG101348	0.7029	0.657245	-0.177313	0	0	0.59364	0.669655	0.420795	-0.0269225	0	0.453875	0.706122	0	0.416395	0	0.658225	0	-0.134942	0	0.514803	0.739535	0.585472	0.669918	0.504957	0	0.616372	0.59168	0.629463	0.412485	0	0.347615	0.569863	0.577017	0.598768	0	0	0.769948	0.436885	0.45872	0.372818	0.258153	0.63901	0.915063	0.216457	0.341313	0.6261	0.63476	0.62999	0.721677
BMS345541	0.59602	0.197297	0	0.3888	-0.57265	0.230038	0.196288	0	-0.195922	0.205508	0.51324	0.463495	0.472985	0.458485	-0.199478	0.233253	-0.218415	0.435503	-0.630025	0.500995	0.619425	0.683643	0.521073	0.50256	-0.505153	0.56572	0.660375	0.598357	0	-0.488115	-0.422405	0.589185	-0.185308	0.433185	0.373437	0.235857	0	0.154317	0.607005	0.173882	0.141735	0.187142	0.59705	0	0.689805	0	0.708098	0.32561	0.579252
BELINOSTAT	-0.226277	0.147237	0.425353	0.0106475	0.343322	-0.175173	-0.136878	-0.0213475	-0.063075	0.546952	0	0	-0.017765	0.146205	0.197095	0.150383	0	-0.441695	-0.187138	-0.391545	0.18018	-0.44811	-0.358127	0.13709	-0.171565	-0.162247	-0.185375	-0.633413	0.163945	0.435312	-0.197687	0	-0.139728	0	0.16895	-0.46717	-0.215798	0.334915	0.127575	0.396745	0.339543	-0.175845	0	-0.188832	0	0.443613	-0.437258	-0.189635	0
SGX523	-0.170492	-0.44785	-0.225733	0.329663	0.18987	-0.118792	0	0.033095	0.423582	-0.33681	0.247685	-0.141357	-0.364098	-0.302635	0	-0.16856	0.265858	-0.168793	0.582457	0.148985	-0.172428	-0.408647	0	-0.161625	0.462477	0	-0.558347	-0.293598	-0.17826	0.158502	0.337215	-0.339548	0.190092	-0.143795	-0.212115	-0.421303	0.19162	-0.130335	-0.430475	-0.45841	-0.212685	-0.18451	0	0.318568	-0.303175	-0.135653	-0.471027	-0.333175	-0.17188
FLUOROURACIL	0.114238	-0.1746	0.661822	-0.44763	0	0.220958	0.0665325	0.421085	-0.375428	0.3865	0	0	0.317462	0	-0.4258	-0.40213	-0.612485	0.227145	-0.1722	-0.134615	0.16097	-0.140623	-0.65426	0.186915	-0.431762	0.16876	0.15533	-0.13388	0.5315	0.37544	-0.159165	0.157225	0	0.127603	-0.11499	0	-0.227717	-0.17332	0.507748	0.148415	-0.482112	-0.4166	-0.297575	-0.12594	-0.264423	0	0.31887	-0.15523	0.11032
KU55933	0.697307	0.623005	-0.17273	0	-0.195885	0.206668	0.517768	0.167582	0	0	0.542098	0.53851	0.29048	0.300503	0	0.464565	-0.164793	0.160282	0	0.52082	0.73194	0.757478	0.740653	0.51684	-0.14656	0.170373	0.689797	0.754155	0.109325	-0.191755	-0.132985	0.28123	0.20119	0.623718	0.381093	0.529558	0.80443	0.190895	0.48615	0.15421	0.378825	0.634352	0.671362	0.18749	0.65806	0.554907	0.742343	0.422745	0.51214
OSI930	0.328192	0.18799	-0.389207	0	0	0.324105	0.168898	0	-0.33981	0	0.339848	0.173418	0.32336	0.368868	0.344517	0.177195	0.254352	0.492202	0.17002	0.371855	0.338583	0.46461	0.51314	-0.108245	0	0.48084	0.46868	0.40236	0.129752	-0.218655	0.12199	0.201295	0	0.35259	0.34856	0.387345	0.46224	0	0.157257	-0.15392	-0.166098	0.18045	0.162573	0.1299	0.226315	-0.154817	0.48506	0.481007	0.35021
CD1530	0.212347	0.548895	-0.433563	0.166618	0	0.792297	0.211372	0.475587	0.370418	0.166963	0.145132	0.790148	0.188205	0.498038	0.399085	0.618525	0.324008	-0.141445	0	0.777253	0	0.179122	0.54114	-0.276985	0.224532	0.751095	0.24951	0.43505	-0.149085	-0.17311	0	0.799122	0.374675	0.19306	0.59628	0.64271	0.668342	0.414633	0.50063	0.21113	0.625308	0.248345	0.619345	0.5042	0	0.343813	0.468335	0.654628	0.866842
BIX01294	0.543998	0	0	0.41614	-0.594045	0	-0.172425	0	0	0.194775	0.588855	0	0.447698	0.560175	-0.377275	0.219218	-0.193985	0.171653	-0.661112	0.224705	0.557423	0.586198	0.217683	0.47007	-0.484785	0	0.597387	0.461442	0	-0.394282	-0.455742	0.56094	-0.435727	0	0.485673	0	0	0.0027875	0.557323	0.585767	0.300528	0.20112	0.138788	-0.430065	0.585342	0	0.649305	0	0
TEMOZOLOMIDE	-0.207157	-0.61017	0.156365	-0.475162	-0.136297	-0.149897	0	0.22975	-0.337492	0	-0.35675	-0.48925	0	0.288307	-0.34241	-0.277942	-0.235898	0.55439	0.521045	0.344385	0.127345	-0.197615	-0.742443	0.38803	0.195845	0.429912	-0.128188	-0.41426	0.403048	0	0.208895	-0.422932	0	-0.272303	0	-0.01134	-0.54485	-0.140565	-0.412225	-0.18619	-0.601455	-0.533587	-0.453575	-0.20322	-0.637135	-0.332035	0	-0.228802	-0.208595
TIVANTINIB	-0.144443	0	-0.21053	0.366758	0	0	0	-0.158225	0	-0.196825	0	0.249807	0.188805	-0.307463	0	0.163908	0.200228	0.254072	0	0.228265	-0.406523	-0.282605	0.191353	-0.304372	0	0	-0.330863	0.0679825	0	0	-0.123463	0.180688	-0.142995	-0.181925	0.201992	0.17327	-0.19083	-0.142302	0	-0.0153075	-0.123122	-0.190277	0	0	-0.155975	-0.200555	-0.15861	0.36616	0.17224
BMS536924	0.72065	0.476562	-0.327078	0	-0.283172	0.539423	0.619823	0.343185	0.36032	-0.18816	0.39297	0.571043	0.17064	0.368463	0.195293	0.414605	0.143503	0.4324	0	0.585788	0.698348	0.632125	0.586395	0.483685	0.477442	0.312615	0.674848	0.653593	0.329352	-0.41067	0.386213	0.562435	0.497022	0.49384	-0.14272	0	0.727272	0.58739	0.181303	0.424258	0.568285	0.765602	0.795532	0.174698	0.345967	0.48502	0.693163	0.462438	0.69607
SB525334	0.576213	0.22863	-0.172513	0.417502	-0.518328	0	0.27314	-0.29024	0.14159	-0.166192	0	0.36933	0.31149	0.348548	0.198458	0.423347	-0.462805	0.439267	-0.201712	0.514323	0.511003	0.551535	0.539678	0.248583	0.159895	0.44183	0.46197	0.589078	-0.16155	-0.512722	-0.14611	0.470218	0.152947	0.130717	0.336245	0.39559	0.511995	0.348677	0.206638	0.161483	0.533312	0.403073	0.604877	-0.510933	0.601357	-0.12459	0.638713	0.188472	0.47194
LY2183240	0	-0.142918	-0.40707	0.13355	0.166765	0.476587	0.20282	0	0.324367	-0.409488	-0.146815	0.374545	-0.319447	-0.187225	0.13415	0.184867	0.391103	0.36753	0.19411	0.37314	0	-0.295503	0	-0.163557	0.188222	0.412143	0	0	-0.141513	-0.361708	0.328132	-0.192695	0	0.164593	0	0	0.01788	-0.147935	-0.195733	-0.321625	-0.33208	-0.173005	0.447185	0.126342	-0.147187	0.143925	0	0	0.477885
DASATINIB	0.589175	0.439315	0.3191	-0.299748	-0.178795	0.21252	0.21592	0.363957	0	0.198985	0.404602	0.165002	0.171288	0.35077	0.384475	0.564835	-0.513617	0.548872	-0.186528	0.252167	0.71044	0.57294	0.445147	0.509995	-0.398682	0	0.746827	0.204107	0	-0.214977	-0.167593	-0.137683	0	0.13995	0.17556	0.607485	0.565725	0.396562	0.37124	0.352555	0	0.20691	0.367997	0	0.217248	0.415035	0.65438	0.368202	0.18224
SORAFENIB	0.231102	0.185805	0.026595	0.14291	0	0.714875	0.546915	0.412652	0	-0.173755	-0.16035	0.693597	0.16301	-0.181298	0.505912	0.48383	0	0.12412	0.311758	0.66375	0.20106	-0.163455	0.464185	-0.451445	0	0.27746	0.546318	0	0	0	0.21282	0.497925	0.20581	0	0.188005	0.68377	0.719207	0.191417	0.254178	-0.160968	0	0.188007	0.170543	0.483432	0.17392	0	0.201322	0.309855	0.600485
NVPTAE684	0.722167	0.53571	-0.4103	-0.13413	-0.429907	0.60945	0.584527	0.326275	-0.201627	-0.178528	0.483185	0.556362	0.17122	0.442312	0	0.524898	-0.308965	0.180592	0	0.61901	0.764112	0.595035	0.743433	0.590548	0.177203	0.548312	0.675382	0.6612	0.0062175	-0.528905	0	0.606622	0.198098	0.464905	0.418318	0.377082	0.690105	0.4555	0.280527	0.155175	0.495623	0.537833	0.709082	0	0.57627	0.225835	0.763105	0.572067	0.669918
CANERTINIB	0.730267	0.673795	0	0	-0.42125	0.589503	0.578178	0.373495	0	0.369897	0.54215	0.672033	0.143615	0.428133	0.298015	0.557288	-0.469907	0.40654	0	0.632742	0.780262	0.6419	0.623097	0.656035	-0.420882	0.613152	0.73244	0.627465	0.29245	-0.47589	-0.132832	0.51557	0.227695	0.60448	0.416743	0.614635	0.702002	0.42254	0.475303	0.483637	0.463985	0.553077	0.704765	0	0.575608	0.479538	0.802415	0.565255	0.67671
TPCA1	0.20083	0.332383	-0.136942	0	0.310723	0.694943	0.614498	0.454255	0.241905	-0.19413	-0.198323	0.657547	-0.349177	-0.171602	0.496845	0.258257	-0.335253	0	0.585565	0.627927	0.397485	0	0.306652	-0.393695	0.214105	0.256295	0.43639	0	0	0.192208	0.200595	0	0.441935	0.476345	0	0.630637	0.69441	0.18035	0	-0.335425	0.131502	0.22089	0.50063	0.25658	-0.18658	0.268522	0.0006025	0.224035	0.261908
GDC0941	0.723123	0.56197	-0.172425	0.36406	-0.50581	0.192285	0.57354	0.143283	0	0	0.605478	0.566593	0.377145	0.221505	-0.190185	0.236292	-0.20389	0.15261	-0.493268	0.474785	0.798893	0.758437	0.723705	0.579377	-0.449765	0.174855	0.68682	0.842225	0.185182	-0.460442	-0.152883	0.295637	0.154225	0.528968	0.160413	0.195048	0.66211	0	0.61311	0.357457	0.276672	0.578375	0.743865	0.206217	0.686192	0.531203	0.755513	0.262643	0.279075
TIVOZANIB	0.742245	0.631498	-0.364262	0.430915	0.126075	0.445557	0.642853	0.441645	0.203055	-0.369833	0.218498	0.61475	0.0547	0.187548	0.38953	0.530573	0.197685	0	0.52915	0.528035	0.73706	0.572937	0.718313	0.217402	0.167673	0.54477	0.649752	0.565227	0.334215	0	0.40892	0.19131	0.575507	0.612132	0	0.236373	0.831592	0.444028	0	-0.181803	0	0.632073	0.68768	0.231985	0.560693	0.633528	0.60273	0.585573	0.576937
RUXOLITINIB	0.5191	0.19936	0	0.14635	-0.5055	0.490598	0.43652	0.016425	-0.15536	0.384805	0.47069	0.54757	0.167717	0	-0.247075	0.416495	-0.218778	-0.425405	-0.274713	0.52233	0.504158	0.440877	0.526813	0.437897	0	-0.06401	0.445773	0.577298	-0.147728	-0.464402	-0.396913	0.610235	0.18261	0.426347	0.443532	0.36932	0.46268	0.196195	0.508095	0.20854	0.453132	0.184748	0.544957	0	0.22723	0.428737	0.610665	0.196557	0.489897
MGCD265	0.649765	0.559163	0	0.12718	-0.456663	0.190435	0.41603	0	-0.486575	0.248365	0.489328	0.174045	0.365975	0.382725	0	0.495305	-0.427173	0.35494	-0.58346	0.348193	0.70572	0.681227	0.610587	0.549255	-0.563732	0.158908	0.75157	0.482233	0.134325	0	-0.181085	0.196065	0	0.572185	0.480422	0.498507	0.464083	0.310805	0.57071	0.145533	0	0.408822	0.524253	-0.181792	0.651903	0.506763	0.710607	0.27737	0
ABT737	0.537785	0.552305	-0.102138	0	0	0.703673	0.500768	0.331188	0.195705	0.162798	0.31316	0.746378	0	0	0.427023	0.601128	0	0	0	0.680508	0.489897	0	0.575198	0.352098	0	0.624082	0.497847	0.195398	0	0.381223	0	0.558377	0.435645	0.192818	0.426758	0.611375	0.747977	0.451215	0.1851	0.286765	0.484328	0.207033	0.634007	0.161562	0	0.206515	0.469037	0.643232	0.72979
SELUMETINIB	0.623395	0.178728	-0.05575	0	-0.190515	0.608805	0.504552	0.557347	0.191147	0.161625	0.180478	0.646905	0.19626	0.201917	0.36599	0.52932	-0.196813	0.15387	0.532955	0.670462	0.660075	0.490717	0.341555	0.300897	0.16634	0.553555	0.539915	0.478743	0.369445	-0.428	0.43011	0.512295	0.533432	0.617282	0	0	0.765047	0.459255	0.199747	-0.0377075	0.19738	0.522443	0.679205	0.23547	0.20926	0.529628	0.637665	0.52544	0.592522
AZD6482	0.67036	0.195997	0.0959575	0.178342	-0.5232	0	0.546063	0	0	-0.15372	0.51844	0	0.462415	0.26171	-0.156535	0.221417	-0.216585	0.608815	-0.371103	0.540555	0.713912	0.830547	0.621088	0.515373	-0.27713	0.278353	0.770282	0.812312	0.134275	-0.408725	0	0.221518	0	0.4831	0.15721	0.222232	0.594527	0.290202	0.486225	0.181365	0.160263	0.711217	0.712503	0	0.70627	0	0.7986	0.2181	0.272955
SERDEMETAN	0.69526	0.695917	-0.283465	0.180913	0.17346	0.534815	0.61546	0.182762	0.15628	0	0.197497	0.680728	0	0.136245	0.133203	0.460122	-0.16345	0.134268	0	0.551615	0.75062	0.47045	0.626578	0.56368	-0.144242	0.72875	0.48725	0.54377	0	0	0.197785	0.721675	0.26473	0.464353	0	0.196727	0.7415	0.156775	0.23356	0.365507	0.226937	0.24137	0.71427	0.551883	0	0.55592	0.601905	0.70898	0.74839
MG132	0.264522	0.516582	-0.366372	-0.120085	-0.353875	0.728885	0	0.152285	0.168648	0.167162	0.162963	0.643258	0	0.513833	0.16795	0.79641	0.219938	0.189665	0	0.609657	0.208345	0	0.27081	0.199522	0.16647	0.649805	0.228398	0.172185	0	-0.430155	-0.160565	0.738838	0	0.172655	0.538528	0.541632	0.48591	0.485925	0.180915	0.510977	0.585048	0.459888	0.665373	0	0.21759	0.329392	0.569595	0.545935	0.83828
GEFITINIB	0.710882	0.46351	0	0	-0.519775	0.64426	0.518405	0.339247	-0.12606	0.118125	0.466055	0.632755	0.312893	0.343533	0.16228	0.458338	-0.484023	0.40497	0	0.660495	0.761332	0.601067	0.577128	0.580043	-0.149833	0.55596	0.680998	0.583612	0	-0.416805	0.112745	0.593265	0.2429	0.56528	0.205443	0.63028	0.74816	0.246025	0.46473	0.240838	0.33112	0.492057	0.659743	0	0.48596	0.384128	0.76161	0.485932	0.640033
TRETINOIN	0.449508	0.46845	0.430255	-0.108325	-0.297995	0.22441	0.407045	-0.16954	0.1216	0.18786	0.28355	0.194617	0.49338	0	0	0.196162	-0.21023	0	-0.510252	0.215668	0.467703	0.531188	0.422055	0.154475	-0.40334	0	0.563932	0.136325	0.1826	0	-0.202285	0.19738	0.12359	0.210058	0.409895	0.155452	0	0.140808	0.534953	0.469065	0.519182	0.405775	0.44028	0	0.43949	0	0.577688	0	0.401593
PHA793887	0.66243	0.278087	0.18414	0.2669	-0.503602	0.167755	0.23414	-0.14824	0	0	0.579588	0.46972	0.14609	0.203687	-0.151858	0.264943	-0.200985	0	-0.68868	0.237215	0.616035	0.669547	0.67308	0.4372	-0.501208	0	0.63128	0.58685	0	-0.4002	-0.47295	0.276925	0	0.462775	0	0.256563	0.316348	0.155528	0.59687	0.179897	0.484365	0.25628	0.305665	0	0.784122	0.239505	0.741252	0.29606	0.18059
BI2536	0.622012	0.654323	0	0.151485	0	0.492925	0.590055	0.388185	-0.0329525	0.3645	0.466045	0.650155	0.167085	0.211462	-0.158532	0.569562	0	0	0	0.498993	0.71565	0.557667	0.601193	0.535493	-0.34294	0.59401	0.324425	0.559362	0.2101	-0.127137	0.188745	0.552845	0.245372	0.556993	0.337238	0	0.66983	0.337608	0.452462	0.15561	0	0.28534	0.888475	0.228055	0.27936	0.593255	0.58719	0.60369	0.642125
PI103	0.57925	0.162675	-0.546218	0.466647	-0.421515	0.506912	0.205682	-0.4113	0.15556	0	0.317537	0.267753	0.258255	0.383682	0.161447	0.247943	0	0.22259	0	0.498617	0.255283	0.618225	0.641522	0.174448	0.485545	0	0.376192	0.808022	-0.149033	-0.55684	0.132387	0.317613	0.143973	0	0	0	0.575078	0.37612	0.39314	0.143173	0.582263	0.59452	0.732555	0.16019	0.606982	-0.139102	0.653487	0.199247	0.577908
MK2206	0.66325	0.67586	0.133325	0	0	0.500395	0.655578	0.413903	-0.131357	0.149058	0.420065	0.704507	0.120752	0	0	0.2206	0.204162	-0.483727	0	0.518432	0.696677	0.584492	0.657215	0.568603	0.15091	0.543957	0.464402	0.67324	0.188507	0	0.14242	0.549408	0.277527	0.56115	0.438165	0.200555	0.765643	0	0.232373	0.296003	0.240105	0.561993	0.724665	0.450082	0.244695	0.65049	0.584157	0.558595	0.58475
AZD8055	0.495177	0.235347	-0.179065	0.362063	0	0.578732	0.45267	0.216425	-0.139613	-0.227315	0	0.490208	0.104985	0.19428	0	0.18294	-0.203613	0.404865	0.216892	0.541732	0.531983	0.571847	0.449163	-0.134485	-0.360922	0.286127	0.542687	0.710963	0.34495	-0.216913	0.186493	0	0.17642	0.46391	-0.148097	0.446978	0.631243	0.19084	0.201985	0	-0.190595	0.525158	0.251738	0	0.250435	0	0.553758	0.281168	0.286855
ERLOTINIB	0.639617	0.479602	0	0.478425	-0.463753	0.589525	0.24262	-0.127892	0	0.119057	0.366457	0.614178	0.144905	0.189	0	0.509337	-0.493988	0.186443	-0.23541	0.559288	0.629035	0.54893	0.602788	0.412573	-0.467583	0.252588	0.570712	0.597178	-0.112345	-0.419888	-0.356158	0.584005	0	0.203148	0.436465	0.63348	0.635898	0.39982	0.528885	0.192862	0.54184	0.238803	0.66196	-0.201245	0.58548	0.157945	0.686303	0.452155	0.592645
SUNITINIB	0.161342	0.463597	-0.147968	-0.292702	0.37242	0.683338	0.57375	0.386947	0.12115	-0.01247	-0.411257	0.641735	0	-0.170235	0	0.432515	-0.20643	-0.48429	0	0.440468	0	-0.179168	0	0	0.215833	0.448047	0.113505	-0.147965	0.405147	0.361042	0	0.19622	0.260107	0.327033	0	0.467062	0.548138	0	0	0.189243	0	0.133022	0.547095	0.23583	-0.51581	0.191505	0	0.18439	0.567268
NERATINIB	0.641537	0.774545	0	0.203547	-0.178705	0.699752	0.57131	0.202765	0	0.195832	0.46632	0.792495	0.141068	0.36922	0.475397	0.63541	0	-0.157958	0	0.648373	0.69528	0.511443	0.752305	0.25423	-0.168027	0.644165	0.603962	0.543845	0.188927	0	0.173995	0.676342	0.26315	0.511197	0.520962	0.629012	0.800538	0.183622	0.48627	0.315182	0.516245	0.263952	0.680708	0.232818	0.259752	0.315177	0.695497	0.704128	0.796175
GW843682X	0.462058	0.218872	-0.516047	-0.157823	-0.521745	0.551105	0.382873	-0.392527	-0.189103	-0.13386	0.172173	0.452653	0.148478	0.209317	0.42184	0.50935	0	0.55572	-0.482442	0.550015	0.421407	0.557585	0.65639	0.470288	0.32529	0.423442	0.686523	0.515532	-0.167173	-0.486023	0.108692	0.521495	-0.157883	0	0.56087	0.656325	0.2002	0.48908	0.17295	0.373007	0.516702	0.21937	0.291533	-0.204038	0.609642	-0.377012	0.708183	0.237162	0.663155
GSK461364	0.650877	0.6339	-0.46719	-0.20476	0	0.253912	0.61749	0.390315	-0.115312	0	0.191362	0.637502	0	0.20179	0.348835	0.478797	-0.158057	0	0	0.526415	0.771548	0.502955	0.646563	0.567632	0.429127	0.56063	0.588415	0.644912	0.154095	-0.466405	0.42449	0.49316	0.606163	0.487523	0	0.183145	0.771092	0.464838	0	0	0.19214	0.270798	0.7442	0.183773	0.23228	0.621415	0.691612	0.521145	0.589237
IMATINIB	0	0.475005	-0.496717	0	0.13927	0.407378	0.189085	0	-0.171157	0	0.383445	0.45554	-0.387593	0.12915	0	0.149138	0.38979	-0.55624	0.209368	0.147528	0.184007	-0.421357	0.54663	0	0.363418	0.238693	-0.470568	0.201808	0.13568	-0.200655	0.312135	0.55805	0.47342	-0.154957	0.202228	0.162215	0.464813	0.17598	-0.172747	-0.16661	0	0	0.162188	0.41831	0	0.214572	-0.167137	0.415343	0.446985
LINIFANIB	0.46027	0.158155	-0.2836	0.273788	-0.455462	0.403995	0.1141	0.166272	-0.163257	0.437045	0.411807	0.466083	0.298545	0.39744	0	0.509968	-0.214225	0	-0.247737	0.482405	0.445522	0.41133	0.267618	0.186917	0.143308	0.543125	0.279595	0.383547	-0.322458	-0.40179	-0.39109	0.582738	0	0.379968	0.429407	0.4307	0.445935	0.255732	0.23554	0	0.38326	0	0.285293	0	0.26855	0.203045	0.571905	0.52087	0.513825
ZEBULARINE	0	0	0.422805	-0.28174	-0.149955	0.188585	-0.118928	-0.14667	-0.161727	0.615507	0.163175	0.174657	0.13941	0	0	-0.187718	-0.427945	-0.1608	0	0.33534	-0.159873	0	-0.374727	0	0	-0.132227	0	0	0.141685	-0.119645	-0.37604	0.179835	0	0.306715	0.330512	0	0.135852	0.143905	0	-0.415392	0.17556	-0.3949	-0.151182	0	-0.253207	0	0	-0.149147	0
MERCK60	0.637643	0.47825	-0.16485	0.36011	-0.190232	0.51417	0.464898	0.368667	0.147498	0.16159	0.35778	0.57181	0	0.372812	-0.138575	0.517772	-0.209097	0	-0.18821	0.532325	0.5224	0.433725	0.173895	0.40754	-0.13195	0.536752	0.218427	0.58165	0.24477	-0.18684	-0.20209	0.519035	0.21701	0.49448	0.129183	0.194595	0.561005	0.35948	0.4046	0.14292	0.346407	0.18124	0.710955	0.353517	0.206097	0.384285	0.573255	0.458848	0.625367
TACEDINALINE	0.679133	0.557397	0	0.174267	-0.409413	0.497435	0.270632	0.192958	0	0.188447	0.49673	0.596137	0	0.46531	-0.168323	0.475038	0	0.166098	-0.208207	0.561825	0.59482	0.575337	0.593315	0.470938	0	0.622212	0.573338	0.59675	0.141595	-0.469135	0	0.654977	0.43092	0.469633	0.149037	0.337668	0.609123	0.325047	0.48889	0.379493	0.420212	0.561237	0.761055	0.484723	0.344398	0.4028	0.667807	0.5707	0.681723
BARASERTIB	0.228485	-0.190073	-0.557203	-0.363677	0.152353	-0.17005	0.269095	0.148927	0	0	-0.138	0	-0.426837	0.16253	0.17142	-0.137322	-0.382617	0.428073	0.472178	0.355623	0.257763	0.19134	-0.166785	0.47571	0.609463	0.229495	0.158205	0.371038	0	-0.470965	0.01334	0	0.501432	-0.175435	-0.233205	0	0.18013	0.54778	-0.448755	0.1483	0.400995	0	0.35973	0	-0.151267	0	0.51892	0	0.163062
CRIZOTINIB	0.714035	0.615138	0	0	-0.50556	0.590938	0.628467	0.38301	0	0.24518	0.559205	0.623988	0.13295	0.439038	0	0.47491	-0.2465	0.37785	-0.254493	0.661722	0.77649	0.719947	0.640385	0.617062	-0.191482	0.532915	0.747552	0.705125	0	-0.494522	0	0.5471	0.161795	0.582278	0.432827	0.458773	0.61205	0.338885	0.545397	0.351953	0.15695	0.570195	0.715758	0	0.543538	0.54853	0.774435	0.54754	0.657517
NILOTINIB	0.593507	0.558638	0	0.346067	-0.160415	0.751877	0.514042	0.399973	0	0.166595	0.44122	0.7619	0.41454	0.388097	0.203343	0.554145	-0.202123	0.33605	0	0.736383	0.63304	0.542743	0.587285	0.3317	-0.50393	0.690998	0.67049	0.5862	-0.02695	-0.17908	0.116225	0.736738	0	0.478007	0.520455	0.624308	0.704488	-0.143835	0.586565	0.339533	0	0.463765	0.62491	0.47176	0.220105	0.17309	0.623103	0.704145	0.773295
PIFITHRINMU	0.394775	0.225117	-0.390103	0	-0.51112	0.665745	0.244385	0.18222	0.308268	0	0.390028	0.552883	0	0.488447	0.334885	0.520745	-0.379532	0.457717	0	0.673255	0.459615	0.504455	0.424565	0.430602	0.15347	0.556795	0.523358	0.588063	0.36674	-0.513165	-0.184142	0.513035	0	0.461653	0.430955	0.506032	0.232263	0.37849	0.41544	0.424205	0.156142	0.44126	0.629472	0.17114	0.22856	-0.218075	0.663295	0.276005	0.665373
TOPOTECAN	0.58108	0.250993	0.142655	0.359542	-0.453955	0.382877	0.46726	-0.154515	-0.385512	0	0.468855	0.532937	0.467917	0.385625	0	0	-0.370535	0	-0.55295	0.554153	0.637305	0.662138	0.611108	0.365708	-0.554283	0.58107	0.657197	0.52459	0.136495	0	-0.369045	0.620143	0	0.502195	0.473237	0.37712	0.515595	0.077645	0.681235	0	0	0.208785	0.29674	0.201972	0.67626	0.419173	0.653227	0.59657	0.60182
IFOSFAMIDE	0.464895	0.30038	0.508155	-0.09122	-0.375953	0.154542	0.33732	-0.16358	-0.13015	-0.014485	0.550602	0.30279	0.3895	-0.15921	0	0.412452	-0.328487	-0.330622	-0.491632	0	0.487123	0.444848	0.381265	0.349318	-0.359455	-0.213617	0.48315	0.379655	0.474718	0.357868	-0.394838	0	0	0.465425	0.168607	0.272118	0.38708	0.347048	0.591877	0	0	0.209363	0.46602	-0.149505	0.518258	0.380795	0.54288	0	-0.109595
BIBR1532	0.45372	0.715525	-0.34596	0	0	0.473828	0.453195	0.498497	0	0.203847	0.137393	0.63239	0	0.203905	0.399135	0.443047	0.487405	0.333295	0.216938	0.627103	0.214927	0.24756	0.64353	-0.170145	0.124692	0.723603	0.516505	0.222225	0.17944	0.116625	0.18779	0.63296	0.507923	0.450172	0.218652	0.537567	0.699642	0.279133	0.22754	0	0.382607	0.622408	0.532382	0.613215	0.233395	0.38864	0.496725	0.64671	0.702538
BMS754807	0.57118	0.683407	0.294872	0	0.14176	0.643345	0.55814	0.45515	0.156562	0	0.19298	0.707058	0	0	0.184627	0.548203	0.137505	0.33514	0	0.538508	0.553652	0.32914	0.597705	0.33813	0	0.510602	0.622302	0.626215	0.365465	0	0.192623	0	0.49309	0.59359	0	0.66056	0.766825	0.13311	0.1928	0.36678	0	0.814235	0.666602	0.249188	0.258443	0.553468	0.308063	0.547377	0.556245
OBATOCLAX	0	0.587395	-0.2465	-0.242795	0	0.66341	0.206767	0.218323	0	0	0	0.68353	0.11651	0.210025	0.468583	0.53042	0.475672	0	0	0.668925	0	0	0.553872	0.384285	0.528798	0.717063	0	0.477838	0	-0.165928	0.15509	0.64079	0	0	0	0.545318	0.587943	0.117763	0	0.18264	-0.161215	0.240525	0.577688	0.47275	0	0	0.200492	0.569775	0.76568
STAUROSPORINE	0.59751	0.270093	0.225463	0.393605	-0.52644	0	0.16936	-0.125605	0	0	0.492673	0	0.400525	0.211737	-0.167655	0	-0.518335	0.213062	-0.694512	0	0.575782	0.69842	0.22836	0.493885	-0.59818	0	0.64579	0.264242	0	-0.373742	-0.499982	0	-0.268188	0.240372	0	0.265485	-0.18522	0.163305	0.587002	0.453805	0	0.14152	0	-0.475477	0.702245	0.244143	0.696532	0	0
DOCETAXEL	-0.37534	-0.114128	-0.446157	0.165967	0.4174	-0.186805	-0.16168	-0.241803	0.508585	-0.34889	-0.420297	-0.198695	-0.376182	-0.157328	0	-0.21392	0.523915	0.392848	0.610402	0	-0.512587	-0.488457	-0.172595	-0.42694	0.57794	0.14419	-0.502698	-0.179622	-0.397665	0.398763	0.214883	-0.413722	0.414397	-0.301847	-0.360947	-0.198187	-0.153455	0.132052	-0.65043	0	0.144927	0	-0.128928	0.21212	-0.43391	0.155807	-0.587712	-0.24094	0
DACARBAZINE	0	0	0.375972	0.161252	0.13538	0.192192	0.408618	0	0	0	0	0.166832	0.151185	0.185243	0	0	0	-0.130848	-0.316922	0	0.279855	0.278637	0	-0.146468	-0.39475	0	0.263562	0.30908	0	0.14605	0	0.18851	0	0.153685	0	0.1592	0	0	0.22395	-0.360355	-0.185748	0	0	0.163188	0.11925	0.147952	0.12934	0.212122	0
ABIRATERONE	-0.16673	0	-0.1616	0.372765	-0.313837	0	-0.195692	-0.153133	0.171435	0	0.185828	0.317053	0	-0.153243	-0.15178	0	0.149815	-0.210163	-0.305507	0	-0.447852	0	0.232437	-0.400908	-0.282693	-0.145072	-0.11354	0.161475	-0.28052	-0.123603	-0.173085	0.31259	-0.43179	-0.358812	0.427712	0.1184	-0.18593	0	0	0	0.319478	0.182003	-0.14182	0	0.163445	-0.402797	-0.325087	0.285382	0
ISONICOTINOHYDROXAMICACID	0.546027	0.448665	0.17062	0	0	0	0.397328	0	-0.132272	0	0.174555	0.15894	0.315968	0.314758	0	0	-0.301425	0.32235	-0.136365	0	0.535238	0.443275	0.191098	0.365233	-0.36764	0.161752	0.504402	0.425195	0.194343	0.161562	0.323877	0	0.142457	0.153927	-0.270693	0	0.461195	-0.143157	0	0.194705	-0.140085	0.358413	0.21792	0	0	0.364928	0.40998	0	0.162057
SB431542	0.612823	0.374265	-0.332477	0.348318	-0.51238	0.176512	0.37423	-0.173987	0.124135	0.334352	0.182675	-0.175677	0.343017	0.384478	0	0	-0.201925	0.742895	-0.210553	0.581745	0.609645	0.675737	0.451115	0.576145	-0.13292	0.579107	0.698658	0.56629	-0.296957	-0.492645	-0.0076375	0.207343	0	0.156557	0.19346	0.180347	0.09938	0.331785	0.408585	0.393965	0.34556	0.381593	0.552937	-0.207843	0.572398	0.174925	0.73166	0.362938	0.597198
ISOX	-0.495337	-0.30918	0	0	0.352098	0	-0.431365	0	0.181507	0.591015	0	0	-0.148948	0.263113	-0.19626	0	0.15031	0	0.408315	0.166915	-0.59332	-0.512393	-0.519595	-0.365405	0.20801	0.172082	-0.565638	-0.44811	-0.157738	0.190485	-0.133508	0	0.137585	-0.33018	0	-0.158475	-0.18709	0.08041	-0.417015	0	0.28782	0.136665	0	0.427605	-0.49383	-0.170483	-0.520478	0	0
MASITINIB	0.668717	0.531068	-0.442795	0.488167	-0.546825	0.51299	0.379167	0	0	-0.148973	0.492205	0.608413	0.31204	0.408815	0	0.483048	-0.183883	-0.14646	-0.382493	0.58002	0.64306	0.517057	0.73391	0.443995	-0.117538	0.2405	0.494425	0.67537	-0.16333	-0.572615	-0.363535	0.657825	0.357403	0.444252	0.414428	0.50031	0.68572	0.405467	0.458703	0	0.53709	0.2115	0.654312	0	0.697102	0.307815	0.700773	0.270103	0.552737
PAZOPANIB	0.741317	0.496098	0.129815	0.137565	-0.458755	0.46879	0.498868	0.0083075	-0.444528	0	0.486067	0.541145	0.34139	0.46665	-0.121545	0.500252	-0.50524	0.54585	-0.452433	0.568168	0.754452	0.664933	0.617298	0.62414	-0.469857	0.499845	0.717962	0.623003	0.329965	-0.489092	-0.160928	0.453522	0	0.437877	0.489912	0.639615	0.623942	0.216647	0.464895	0.294245	0.319185	0.497485	0.627075	-0.34447	0.59643	0.202127	0.793963	0.530092	0.485507
ALISERTIB	0.175875	0.410772	-0.398047	-0.181085	0.343363	0.563773	0.474548	0.400282	0	-0.1965	-0.15128	0.585265	-0.1438	0	-0.136382	0.391815	0.443815	-0.485432	0.243173	0.214998	-0.295737	-0.141297	0.55281	-0.392597	0.474672	0.480372	-0.185998	0.48607	0.19164	-0.163502	0.46585	0.558925	0.492935	0.349442	0.153798	0	0.711565	0.369437	-0.180525	-0.229715	0.440487	0.574908	0.492475	0.521925	0	-0.162065	-0.182745	0.54865	0.59039
ENTINOSTAT	0.658072	0.490538	-0.17308	0.17782	-0.437615	0.516745	0.272278	0.402315	-0.149867	-0.157878	0.449808	0.57183	0.301875	0.471215	-0.169235	0.474605	-0.180505	0.43666	-0.185955	0.518258	0.60324	0.572442	0.48967	0.505552	0	0.580445	0.546223	0.602893	0.346098	-0.464815	0.126138	0.622555	0.189117	0.446883	-0.176602	0.175512	0.582072	0.177905	0.492727	0	0.149175	0.240215	0.780992	0.475672	0.311355	0.17829	0.644473	0.508055	0.683638
MLN2238	0	-0.246045	0.394533	0.10983	-0.466425	0.194505	-0.311337	0.146592	-0.383182	0.200313	0.136392	0.159227	0.363978	0.378032	0.163995	0.536798	-0.535883	0	-0.458973	0.344983	0.436302	0.392612	0	0.417857	-0.416185	0	0.482795	-0.140873	0	-0.191325	-0.344367	0	-0.338185	0.19297	0.203662	0.412892	-0.369485	0	0.221958	0.471218	-0.12224	0	0.198805	-0.43642	0	0	0.515402	-0.165327	0.43644
CEDIRANIB	0.613243	0.56468	-0.141055	-0.269805	0.124507	0.228942	0.559712	0.469185	0.228038	0.172255	0.136635	0.53556	-0.170588	0	0.507537	0.51256	0.422075	0	0.520933	0	0.736585	0.194167	0.5743	0.448235	0	0.43035	0.557423	0	0.312107	0.151867	0.536937	0	0.593615	0.56386	0	0	0.765118	0.262533	0	-0.158325	0.227115	0.272165	0.66821	0.193763	0.193035	0.66582	0.5329	0.506047	0.232852
BRDK88742110	0.669015	0.600235	0.158403	-0.111625	-0.174242	0.60474	0.569902	0.427745	0.123328	0	0.26623	0.668305	0	0.179553	-0.133018	0.579963	-0.206852	0	0	0.507973	0.662408	0.53942	0.593827	0.410835	-0.353815	0.713673	0.554288	0.50778	0.33092	-0.115627	0.0323025	0.605475	0.405178	0.561415	0	0.36084	0.742725	0.31542	0.512822	0	0.425815	0.56527	0.721387	0.372605	0.437245	0.487465	0.69175	0.68084	0.672172
QUIZARTINIB	0.510158	0.59544	0	0	-0.194895	0.610918	0.502578	0.372428	-0.156925	0	0.402002	0.630115	0.358457	0.354942	0.188793	0.45839	-0.496205	0.45208	0	0.684558	0.576845	0.652922	0.570128	0.466458	0	0.631615	0.657482	0.679902	0.318335	-0.444837	-0.151	0.547817	0.21008	0.282892	0.424325	0.703755	0.678185	0.2074	0.459705	0.113257	0.159587	0.56113	0.646995	0	0.501718	-0.117195	0.735975	0.494493	0.644205
OSI027	0.531312	0.536343	0	0.21006	-0.146652	0.5453	0.584035	0.376302	0.05201	-0.1694	0.38635	0.605442	0	0.14093	-0.199777	0.396462	0	0	0	0.543003	0.656563	0.669192	0.658135	0.388792	-0.145932	0.47983	0.556288	0.789937	0.414102	0	0	0.489015	0.191185	0.542502	0.385657	0.193667	0.676312	0.11418	0.234978	0.370457	-0.131475	0.584195	0.69603	0.496142	0.250053	0.437443	0.548155	0.238145	0.613818
BOSUTINIB	0.507235	0.213303	0.021655	0.426465	-0.44773	0.174157	0	0	0	0.374415	0.22848	0	0.402253	0.656255	-0.11246	0.208223	-0.227685	0.343335	-0.557353	0.430905	0.447018	0.510625	0.49636	0.44037	0	0	0.509543	0.53853	-0.285017	-0.396033	-0.46392	0.470905	-0.180315	0.165795	0.23754	0.418875	0	0.134513	0.579612	0.708767	0.198245	0.19333	0.187667	-0.481148	0.513258	0	0.630983	0	0.16341
CYTARABINE	0.12743	0.376727	0	0.141412	-0.396033	0.514158	-0.11785	0.162843	-0.413535	0.148515	0.02256	0.444887	0.19244	0.337645	-0.399772	0.49454	-0.364553	0.0100425	-0.384215	0.500448	0.41077	0.186718	0.18519	-0.020435	-0.432613	0.59708	0.438665	0.184323	0.018125	-0.26445	-0.14266	0.732698	-0.12371	0.314105	0.256497	0.411508	0.188053	-0.137783	0.63248	0.143407	-0.157575	0	0.469398	0.437588	0.17796	0	0.401987	0.616485	0.722633
ETHINYLESTRADIOL	0	0	0.711222	-0.0590075	0.467278	0.413973	0	0	0.16227	0.373045	-0.201405	0.36547	0.463065	-0.364345	0	0.154085	-0.347562	-0.240008	-0.128408	0	0	-0.107112	-0.455033	-0.17946	-0.511435	0	0	-0.22541	0.429205	0.740585	-0.138407	-0.286035	-0.375057	0	-0.125647	0.174448	-0.157555	-0.18761	0.468477	0.164065	-0.36091	0.172072	0	0.31226	-0.492503	0	-0.420825	0.184185	0
MIFEPRISTONE	0.140003	0.149088	-0.48727	0	0	0.364563	0	-0.023325	0.366472	0.2123	0	0.317205	-0.158982	0.76171	0.184495	0.33608	0.14166	0	0	0.508455	0.149025	0.323163	0.433673	-0.14848	0.495145	0.44336	0	0.392605	-0.32279	-0.342828	-0.192048	0.444585	0.339218	0	0.23614	0.209643	0.213775	0.343153	0.165763	0.677595	0.377735	0.376935	0.413133	-0.345757	0.192557	-0.41823	0.38684	0	0.43117
PUROMYCIN	0.216455	0.559257	0	0	0	0.727348	0.464112	0.466097	0.132623	0.460633	0.404275	0.74014	0.387975	0.24167	0	0.720215	0.124162	0	0	0.727868	0.475523	0	0.493712	0.173247	0	0.702067	0.47938	0.187262	0	0	0	0.777127	0	0.20909	0.564025	0.619997	0.67159	0.37029	0.506857	0.399637	0.45162	0.425648	0.64134	0.533585	0	0	0.489475	0.650493	0.850015
ARTEMETHER	0.293032	0.0932475	-0.158275	0.38887	-0.13548	0	0.124527	0	0.524772	0.134052	0.315758	0.393452	-0.32861	0	0	0	-0.242	-0.51037	-0.15339	0.15196	0	0	0.292888	-0.245312	0	-0.213395	0	0	-0.330902	0.270182	0.24348	0	0	0.343357	0	-0.159727	0	0.350442	0.128675	0.202955	0.37039	0.142143	0.161455	0	0.158177	0.41223	0	0	-0.326298
ARTESUNATE	0.12102	0.538053	0.51894	0.165162	0.108688	0	0.138813	0.307758	-0.0062175	0.375165	-0.124543	0.256005	0.304297	-0.31067	-0.378138	0.29781	0.202082	-0.668785	-0.176687	-0.154697	0	-0.197497	0.211875	-0.412257	-0.580955	0	-0.341043	-0.416058	0.141093	0.558045	-0.34039	0.124798	-0.159875	0.355438	0	-0.197515	0	-0.406498	0.391082	0	0	0.333973	-0.381555	0.39932	-0.12325	0.524608	-0.583117	0.405875	-0.134687
CELECOXIB	0.647382	0.232143	0.45405	0	-0.553775	0.15226	0.180413	-0.132167	0	0	0.51002	0.0101575	0.352768	-0.180863	0.0746275	0.17258	-0.293208	0	-0.667597	0.02794	0.68987	0.568665	0.405745	0.611927	-0.482325	0	0.629382	0.452915	0.17384	-0.498418	-0.42407	0.208148	-0.323435	0.18497	0	0.358422	0.00478	0	0.547708	0.49207	0.510935	0.394688	0.405992	-0.194477	0.630833	0.401398	0.69865	0.20251	-0.169818
FLUCONAZOLE	0.436047	0.361598	-0.530125	0.195505	-0.427237	0.169635	-0.14298	-0.165263	-0.13187	0	0.444205	0.47503	-0.121677	0.229985	0.443368	0.477225	0.165777	-0.334892	-0.130785	0.24816	0.311443	0.407782	0.700535	-0.340565	0.33501	-0.147523	0.187888	0.443993	-0.11105	-0.470395	0.102315	0.21553	0.411375	0.359268	0.494592	0	0.66158	0.45891	0	0	0.607892	0.39639	0.533687	-0.131735	0.595063	0.330385	0.51091	0	0.237742
TRIAMCINOLONE	0	0	-0.50665	0.305177	0.130518	0	0.056335	0.199027	0.13686	0	0.135107	0	-0.155195	0.156053	0.143028	0.14231	-0.134605	0.473513	0.426067	0.49158	0.348905	0	0.152865	0.172747	0.183127	0.264443	0	0.0325525	0.13951	-0.33109	0	0.171047	0.361998	0.457815	0.338433	0.195385	0.173288	0.469568	0.118693	0.160323	0.187045	-0.124975	0.253592	0	0	0.163305	0.362793	0.14123	0.234827
YOHIMBINE	0.40123	-0.142932	-0.49092	0.156968	-0.167995	0.153773	0	0	0.296202	-0.143143	0.175575	-0.326392	0.193593	0.21499	-0.02745	0.32051	-0.107485	0.673623	0.133075	0.461448	0	0.221285	0.14157	0.49476	0.408347	0.50797	0.425523	0.458757	-0.360665	-0.555035	0	0.212152	0	-0.100195	-0.13581	0	-0.163885	0.421247	0	0.43444	0.424698	0	0.459157	-0.44297	0.236223	0.147338	0.579705	0	0.447773
CLOTRIMAZOLE	0	0.249688	0.565362	0.199445	0	0.150592	0.156625	0.157535	0	0.379862	0	0.223832	0.298648	-0.29321	-0.500038	-0.13938	-0.163878	-0.599145	-0.131428	0	0.148762	0	-0.439292	0	-0.55156	0	-0.438348	-0.4246	0	0.486415	-0.356563	0.303243	0.162105	0.425953	0	0.182292	0.140423	-0.412353	0.46296	-0.126165	-0.131733	-0.128238	-0.245182	0.432145	-0.517528	0.61358	-0.488845	0.412655	0
CLADRIBINE	0	0.213702	0	0	-0.150465	0.593082	-0.18212	0	0	0	-0.280115	0.600395	0.136417	0.235698	-0.588963	0.221053	0.363262	-0.37742	-0.119145	0.63123	0.165415	-0.182668	0.248427	-0.364243	-0.184982	0.796223	0	0.188557	-0.193775	0	0	0.937002	0	0.18031	0.21674	0.18164	0.270483	-0.149478	0.607917	-0.140795	0	0	0.531493	0.741683	0	-0.150918	-0.19501	0.725378	0.826185
FLUPHENAZINE	0.58541	0.485595	-0.15695	0	-0.415695	0.631038	0.464122	0.41266	0.319053	0.149067	0.372885	0.629455	0.134073	0.20136	0.20095	0.60117	-0.314837	0.341523	0	0.65879	0.566752	0.217993	0.52082	0.371632	0	0.562972	0.496705	0.227137	-0.280703	-0.226965	0	0.58703	0.5287	0.485833	0.232648	0.64051	0.743735	0.206673	0.358032	0.1084	0.462902	0.395377	0.586353	0.351005	0.205305	0.520578	0.676758	0.552362	0.644563
VEMURAFENIB	0.597453	0.59824	-0.380447	0	-0.124815	0.730035	0.605818	0.402427	0.179423	-0.171173	0.405865	0.752935	0.0149625	0	0.467967	0.650502	0.177835	0.271707	0.232107	0.618417	0.54382	0.526752	0.683972	0	0.14439	0.600023	0.660075	0.590533	-0.15248	-0.202905	0.203445	0.569897	0.486243	0.512325	0.18889	0.727718	0.829427	0.445918	0.162032	0	0.39809	0.645285	0.617287	0.510678	0.290033	0.251025	0.5628	0.675678	0.657998
FLUOROMETHOLONE	0.148195	-0.20468	-0.192265	0.347297	0.159073	0.192692	0.139022	0.177008	0.111965	0.186285	-0.166738	0	0	0.150578	-0.191655	-0.12765	-0.428017	0.585137	0.441198	0.55857	0.414378	0.19278	-0.420318	0.347025	0.157562	0.50292	0.214973	0.155945	0	0	0	0	0.35891	0.536195	0	0.19345	0.149367	0.41097	0	0	0	-0.36679	0.19407	0	-0.38704	0.417312	0.440138	0	0.403365
PEMETREXED	-0.368652	-0.395168	0.18286	0.148037	0.16659	0	-0.121075	0.428875	0.360042	0.0127775	0	0.379758	0	0.12385	-0.459585	-0.393425	-0.42487	-0.435032	0	0.38882	-0.120855	-0.190442	-0.482438	-0.334828	0.103728	-0.174343	-0.486755	0.336745	0.0915925	-0.186175	0	0.328547	0.16239	0.26119	-0.177448	-0.33295	0.151597	-0.379007	0.15826	-0.20265	-0.492005	-0.426025	-0.158605	0.202043	-0.50307	0	0	-0.176465	0
ACETYLCYSTEINE	-0.493358	-0.419702	-0.461147	-0.263692	0.536702	-0.196747	-0.206805	0	0.359003	-0.396083	-0.56572	-0.182775	-0.411405	-0.326842	0.20256	-0.278782	0	0.393305	0.736405	-0.222147	-0.650837	-0.662968	-0.609008	-0.39211	0.709095	0.241858	-0.646023	-0.45195	0.155638	0.351948	0.497107	-0.21932	0.47172	-0.44505	-0.425472	-0.234575	-0.194865	0.36663	-0.700002	-0.349343	0.156337	-0.219512	-0.214135	0.13981	-0.634382	-0.210187	-0.624548	0	0
HOMOHARRINGTONINE	0	0.149207	-0.344988	0.187425	-0.42016	0.57174	0	0.348112	0.0368125	0.518415	0.155215	0.508598	0.20445	0.429752	0.14455	0.423023	-0.154477	0	-0.204058	0.59535	0	0.17254	0.137203	0.151353	0.160383	0.18699	0	0.416235	-0.16486	-0.287423	-0.33739	0.66141	0.175272	0.154897	0.471672	-0.183053	0	0.32466	0.222167	0.35637	0.456765	0.414453	0.62891	0	-0.14054	-0.19476	0.42139	-0.212355	0.708005
CAMPTOTHECIN	0.503252	0.433242	0.146342	0.426623	-0.196178	0.177108	0.43427	0.16576	-0.202428	0	0.420005	0.53636	0.4269	0.379628	0	0	-0.380352	0.323933	-0.42241	0.569283	0.568005	0.649523	0.517385	0.145758	-0.514877	0.635153	0.555685	0.51116	0.14547	-0.144953	0	0.632605	0	0.50948	0.421492	0.383405	0.486418	0.17682	0.63854	0.16414	-0.137105	0	0.261528	0.496858	0.340162	0.431725	0.610845	0.625657	0.605885
CLIOQUINOL	-0.419687	0.318918	0.191747	-0.39686	0.327217	0.161945	0	0.33427	0	0.262238	0	0.152078	0	-0.398603	0	0	0.184675	0	0.158752	-0.149478	-0.365698	-0.381298	-0.117885	-0.393135	0	-0.398697	-0.142918	-0.151828	0	0.403313	0	-0.18199	0.325455	0.116812	0	0.139217	0	-0.274257	-0.18534	0.16264	-0.26785	0.20088	-0.192892	0.434148	-0.500522	0	-0.504857	-0.151032	0
MELPHALAN	0	0.134025	0.704065	-0.30737	0.458437	0.181938	0.163675	0.275558	-0.131587	0.262037	-0.37216	0.126337	0.403933	-0.429965	-0.151803	-0.31307	-0.439097	-0.430117	0	-0.245062	0	-0.151803	-0.489523	-0.210415	-0.513027	-0.26737	-0.06348	-0.38097	0.62072	0.67374	-0.390997	-0.33094	0	0	-0.152842	-0.12442	-0.317947	-0.403303	0.437522	0	-0.38405	-0.139315	-0.421283	0.385898	-0.585235	0.176668	-0.431262	0.151732	-0.130885
VINBLASTINE	0.254745	0.163892	-0.16585	-0.158257	-0.419743	0	0.137802	-0.383855	-0.000415	0.38105	0.326923	0.202527	0	0.148125	0.522177	0.429192	0	-0.121995	0	0.3846	0.215957	0.24324	0.303743	0.37658	0.226525	0.15869	0.480935	0.198197	-0.297075	-0.228928	0	0.520478	0.22585	-0.175052	0.431812	0.451767	0.531315	0.53158	0.178005	0.45059	0.699107	0.48224	0.479045	-0.194	0.217142	0	0.567503	0.344442	0.507798
DAUNORUBICIN	0.691365	0.2178	0.348052	0.398633	-0.595243	0	0.191702	-0.171377	0	0	0.57991	0	0.20246	0.187128	0	0.236012	-0.213418	0.165673	-0.625452	0	0.657863	0.72274	0.538427	0.53732	-0.583908	-0.26325	0.72037	0.491773	0	-0.4203	-0.461643	0	-0.198033	0.45253	0	0	0.217402	0.430575	0.554347	0.370928	0.455448	0.189002	0.280077	-0.500955	0.78854	0.260997	0.74307	0	-0.22034
IDARUBICIN	0.477555	0	0.380122	0.357187	-0.43648	-0.449773	0	0	-0.18268	-0.163777	0.43717	0	0.13874	-0.137925	0	0	0.131217	-0.177655	-0.21731	-0.248165	0.423315	0.507947	0.4335	0	-0.553902	-0.28003	0.259742	0	0	-0.15626	-0.439205	-0.246555	0	0	-0.22021	0	0	0.029425	0.216285	-0.166455	0.190763	-0.186638	-0.256345	0	0.735502	0	0.264522	0	-0.327203
DIGOXIN	0	0.192612	-0.159362	0	0	0.471778	0.214337	0	-0.43613	0.480385	0.167428	0.53646	0.22525	0.274487	-0.388795	0.213388	0.132518	0.163805	-0.432472	0.553662	0	0.179745	0.361038	0.458632	-0.109128	0.59869	-0.187617	0.4276	0.182157	-0.134745	0	0.72764	0.154875	0	0.21238	0	0	-0.3722	0.471085	0.20056	0.195655	0	0.560627	0.513517	-0.213548	0	0.169865	0.515452	0.737455
PIMOZIDE	0.50518	0.20473	-0.38414	0.361625	-0.336938	0.35006	0	-0.16202	0.157545	0	0.446905	0	0.407517	0.676275	0	0.437495	-0.196002	0.158862	-0.494453	0.422052	0.411725	0.56194	0.440213	0.415125	0	0.168917	0.414857	0.502472	-0.36675	-0.453058	-0.377982	0.42011	-0.138102	0	0.17913	0.160247	0.191637	0.322993	0.516005	0.737748	0.416168	0.203607	0.241737	-0.46581	0.545682	0	0.621023	0.365723	0.352335
IRINOTECAN	0	0.225695	-0.15094	0	-0.160733	0.50796	-0.138478	0	-0.1581	-0.168515	-0.352375	0.526763	-0.14641	0	-0.2152	0.506595	0.305243	-0.404382	0	0.546552	0.214528	-0.21512	0.459103	-0.200258	-0.178372	0.750275	0	-0.171265	0	0	0.184127	0.8374	0.355963	0.194815	0.216122	0	0.48842	0.309708	0.664737	-0.145522	0.243693	-0.181012	0.45523	0.655323	-0.146875	0	-0.165115	0.72745	0.766498
VINORELBINE	0.40439	0.669643	0.141715	0	-0.15113	0.656385	0.355225	0.120667	0	0.228958	0.325493	0.693242	0.116155	0.345505	0	0.53424	0	-0.393937	-0.486822	0.577945	0.25195	0.41045	0.572635	0.375733	-0.165513	0.53903	0.205225	0.498635	0.0277375	-0.124558	-0.202843	0.684872	0	0	0.515088	0.450905	0.49586	-0.143517	0.470665	0.22577	0.0878375	0.177748	0.58011	0.224977	0	0	0.48599	0.509345	0.682917
EVEROLIMUS	0.554412	0.545477	0	0	-0.436065	0.52842	0.537375	0.300802	-0.138272	0.4466	0.24137	0.539985	0.339888	0.480085	0	0.57672	-0.314103	0.40382	-0.210395	0.615193	0.642277	0.316165	0.517532	0.507475	-0.174492	0.687307	0.560177	0.49618	0	-0.37016	0.17492	0.62757	0.220683	0.435028	0.402965	0	0.520003	0.391565	0.494085	0.404712	0.18703	0.243308	0.862625	0	0.247855	0.482822	0.579137	0.601735	0.697285
MITOXANTRONE	0.55553	0	0.176267	0.38958	-0.454885	-0.422833	0	-0.188463	0	0	0.434945	-0.21191	0	0	0	0	0	0.339695	-0.20903	-0.35439	0.456973	0.603788	0.438117	0.392417	-0.392033	-0.197215	0.574925	0.16997	-0.111977	-0.339975	-0.17535	-0.201775	0	0.205398	-0.206563	-0.198265	0.16709	0.455385	0.434542	0	0.523613	0.177168	0.249053	-0.516413	0.791037	0.193568	0.5706	0	0
IMIQUIMOD	0.506452	0.44385	0.618348	0.119608	-0.3788	0.144643	0	0	0	0.750448	0.19625	0	0.472033	0.52635	0	0	-0.263147	0.352262	-0.64487	0.411155	0.499403	0.532728	-0.132203	0.539525	-0.553728	0.382435	0.519	0.164103	0.21027	0.38192	-0.503982	0.178847	-0.411145	0.367405	0.388282	0.184798	-0.399425	-0.198065	0.619505	0.654382	-0.11658	0.402285	0	-0.179643	0.17242	0.164565	0.545223	0.348888	0.40602
PONATINIB	0.64663	0.587278	0.300762	0	0.155325	0.658355	0.652473	0.483942	0	-0.1863	0	0.650552	-0.140767	0.175067	0.495822	0.606627	0	0.307252	0.30065	0.57855	0.702117	0.548222	0.601685	0.325402	-0.178415	0.56888	0.682482	0.233322	0.328835	0.16297	0.391945	0	0.503803	0.571797	0.165832	0.57227	0.817577	0.357123	0.236868	0.194565	-0.146077	0.602298	0.596812	0.215805	0.29546	0.582647	0.577313	0.620578	0.561917
AMONAFIDE	0.407838	0	-0.152053	-0.160298	-0.441525	0.414745	0.216215	-0.147005	-0.191045	-0.175517	0	0.413605	0	0.159768	-0.488737	0.199917	0.260015	-0.174618	-0.260455	0.424953	0.199082	0.195068	0.201212	0.444895	0.169728	0.601222	0	0.215803	0.173212	-0.451178	0	0.763607	0	0.288282	-0.152067	-0.236772	0	0.36908	0.259198	0.38552	0.508138	0.22325	0.652825	0.554338	0.339385	-0.0415525	0.257433	0	0.692307
FLUDARABINE	0	0.141258	-0.468973	0.35006	-0.257323	0.244377	-0.162447	-0.14038	0.126293	-0.389082	0.198057	0.259607	0.118118	0	-0.393693	0.469225	0.523752	-0.166183	0.308825	0.431192	0	0.091635	0.605718	-0.413212	-0.332037	0.285398	-0.170258	0.37764	-0.08359	-0.320823	0	0.76098	-0.0273925	0.17837	0.393193	0.196265	0.564355	0	0.21621	-0.449895	0.155028	0	0.36983	0.553133	0.279008	-0.177943	0	0.640803	0.572325
MEBENDAZOLE	0.198868	0.222878	0	0	-0.555248	0.616735	0.407863	0	-0.463247	0	0.411627	0.581098	0.168712	0.414287	-0.21221	0.397977	-0.496895	-0.188543	-0.493535	0.453782	0.447188	0.463282	0.335852	0.444245	-0.427382	0.163665	0.233258	0.514405	0.28171	-0.41311	-0.352672	0.518123	-0.14587	0.155335	0.454483	0.478702	-0.155755	-0.32195	0.479125	0	-0.163587	-0.367922	0.351815	0.17835	0.167132	0.178932	0.53975	-0.153473	0.497912
HALOPERIDOL	0.53097	0.55704	0.443792	0	0.0284425	0.113507	0.48079	0.280913	0	0.1525	0.221055	0.160965	0	-0.119972	-0.250453	0.45421	-0.221108	-0.378148	-0.187455	0	0.280405	0.210787	0.246145	0.430302	-0.532438	-0.136302	0.459778	0	0	0.11335	-0.257663	0	0.172123	0.586993	0.291592	0.203233	0.489422	-0.090655	0.206898	0.316472	0.24791	0	0.199428	0.278508	0.190095	0.686025	0.21318	0.126455	0
RALOXIFENE	0.700052	0.681658	-0.20624	0	0	0.308737	0.64845	0.484602	0	0	0.3179	0.56019	0	0	-0.16674	0.190653	0.163703	0.242698	0	0.524875	0.767663	0.54018	0.544843	0.632297	0.160243	0.702095	0.32595	0.563732	0.399065	0	0.168678	0.506593	0.48052	0.475608	0	0.20143	0.738298	0.139992	0	0.295045	-0.128438	0	0.744095	0.52213	0.203795	0.599825	0.638745	0.65084	0.720692
OFLOXACIN	-0.538425	-0.43219	-0.504705	-0.149698	0.212448	-0.170657	-0.282218	-0.20428	0.491088	-0.178218	-0.48709	0	-0.447933	-0.414432	0.425055	-0.222823	0.608775	-0.11746	0.679388	-0.156455	-0.685307	-0.666702	-0.382895	-0.526552	0.745355	0.151445	-0.696187	-0.47872	-0.169368	0.177888	0.43408	0	0.459665	-0.502695	-0.177775	-0.376705	0	0.389997	-0.580973	-0.190015	0.255965	-0.178528	-0.187502	0.126002	-0.552855	0	-0.664285	-0.274298	0
EPIRUBICIN	0.511583	0.241132	0.498572	0.160103	-0.19333	-0.3798	0.207017	-0.17877	0	0	0.410508	-0.18934	0.37728	0	-0.137937	-0.428152	-0.29517	0	-0.489395	-0.139245	0.444333	0.62797	0	0.181235	-0.521898	-0.204212	0.548255	0.176913	0.37672	0.18031	-0.362855	-0.205865	-0.221955	0.114592	-0.343718	0	0.22481	0	0.525223	0.476888	0.129103	0.21296	0	0.181298	0.250912	0.1839	0.481785	0.127702	-0.163603
FLOXURIDINE	0	0.14648	0	0.364202	0	0.279	0	0.13318	0.330993	0	-0.112308	0.234997	0.15279	0.153402	0	0.403782	0.433868	0.3086	0.276715	0.446302	0.154415	-0.392707	0	-0.138015	0	0.66905	0	0	-0.36733	-0.107048	-0.149932	0.711705	-0.135595	-0.154803	0.355385	0.28338	0.193595	0	0.511925	-0.164103	0.349733	0	0.198485	0.51705	0	0	0	0.67405	0.675767
COLCHICINE	0	-0.402983	-0.333593	0	-0.42877	-0.101557	-0.130285	0	0.152625	0.176778	0.26719	0	0.323113	0.147685	0.128392	0.36188	0.117523	0.441138	-0.0935175	0.439505	-0.143325	0.385008	0.135002	0	0.3943	0.340373	0	0.177435	-0.32137	-0.53926	-0.31969	0.429492	0	-0.320745	-0.11746	0	-0.202178	0	0	-0.128568	0.327528	0	0.372455	-0.18411	0.307928	-0.382763	0.441443	-0.146355	0.323487
MEVASTATIN	-0.332232	-0.190468	-0.22956	0	-0.131328	0.14012	-0.282115	-0.111632	0.147515	0.50034	0.451452	0.29652	-0.197195	-0.206283	0	0.127135	0.392182	-0.35328	0.155683	-0.11882	-0.350155	-0.391497	-0.322562	-0.17303	0	-0.125665	-0.403255	-0.288432	-0.348372	0.253292	0	0	0.128128	0.18794	0	-0.187463	0.056135	0.1401	-0.30888	-0.188975	0	-0.15415	0.120188	0.39779	-0.216525	0.353237	-0.463785	-0.439053	0.136547
AMPHOTERICINB	0.578747	0.145228	0.240253	0.336682	-0.588387	0.411425	0.334612	-0.20805	-0.239338	0.164107	0.410262	0.315775	0.332993	0.316323	-0.146723	0.410567	-0.572095	0.368855	-0.574527	0.495403	0.597947	0.58027	0.16663	0.56383	-0.412215	0.225603	0.585065	0.56929	0	-0.430692	-0.455695	0.441072	-0.26336	0.396027	0.417112	0.174965	0	0.166483	0.545863	0.329622	0.297747	0.143025	0.505537	-0.425857	0.515968	0.13796	0.705615	-0.13351	0.40378
NELFINAVIR	0.6151	0.598015	0.156738	0	-0.205262	0.655748	0.457448	0.382805	-0.150822	0.33037	0.44655	0.670658	0	0.184	0.201445	0.641875	0	0.138235	0	0.623478	0.61698	0.555187	0.6611	0.40921	-0.207905	0.565793	0.70133	0	-0.087205	0	0	0.579975	0.193898	0.592113	0.521153	0.69364	0.7711	0.38264	0.242325	0.170665	0.390682	0.589565	0.496057	0.19795	0	0.494245	0.643572	0.63575	0.67695
IDOXURIDINE	-0.509212	-0.36682	0	-0.143918	0.128062	-0.30937	-0.279685	0.44047	0	-0.188142	-0.418922	0	0	-0.141937	-0.161908	-0.40425	0.19865	0	0.1672	0.151675	0	0	-0.34061	-0.382238	0.148938	0.350465	-0.193975	-0.208775	0	0.220667	0	0	-0.174742	-0.163865	-0.127145	-0.381113	-0.175165	-0.176843	0.171008	-0.376715	-0.51503	-0.120197	-0.354737	0.187612	-0.213188	-0.315883	-0.193105	0.146363	0
LEFLUNOMIDE	0.557913	0.2077	0.483438	0.433748	-0.55027	0.467983	0.166123	0	0	0.426582	0.405378	0.396072	0.423683	0.389235	-0.171297	0.150155	0	0.3212	-0.558725	0.482932	0.583377	0.634888	0.16663	0.237462	-0.423265	0.318385	0.598453	0.575285	0	-0.296005	-0.388497	0.43559	0	0.46269	0.378053	0.20979	0.155303	0.353888	0.583005	0.470903	0.479463	0.55969	0.479942	-0.308213	0.583075	0.181985	0.621475	0.038735	0.38967
FLUMETHASONE	0.278885	-0.360442	-0.0580625	0.162093	-0.399093	0.122175	0.112058	-0.406878	0.2751	0.0157175	0	0.142025	-0.291075	0.144635	0.191965	0.163367	-0.259008	0.195145	0	0.34114	0	0.178803	0	0.154177	0.36567	0.299	0	0.341268	-0.398295	-0.334315	-0.153872	0.390408	0	0.258203	0.194183	-0.170127	-0.15374	0.441835	-0.262235	0.357428	0.463905	0.294583	0.422812	-0.19384	0	0	0.458937	-0.16373	0.174805
TERCONAZOLE	0.587835	0.270055	-0.37889	-0.207638	-0.143247	0	0.225612	0.12018	-0.464365	0	0	0.16171	-0.144313	-0.114587	0.22721	0.419865	-0.15979	0	0	0	0.520182	0.40462	0.48316	0.518075	0.154723	0	0.43983	0.20452	0.344125	0	0.15266	0.231632	0.457193	0.220685	0.148883	0.125002	0.460015	0.215875	0	0.147572	0.438255	0	0.53977	-0.316047	0.172758	0.262458	0.524015	0.192355	0.49521
RALTITREXED	0	0.363315	-0.236652	-0.295837	0.400865	0.452433	0	0	0	0	-0.282492	0	-0.293978	-0.188775	0.15044	0	0.466587	-0.488797	0.414515	0	0	-0.476608	0	-0.433708	0.458952	0.285425	-0.448295	0	-0.179113	0.200958	0.146165	0.683995	0.17768	0	0	0.13043	0	0.381005	0.17196	-0.321188	0.152125	0	0	0.561237	0	0	-0.449033	0.63021	0.629053
MITOTANE	-0.475905	0.133245	-0.23261	0	0.435918	0.405332	-0.131197	0.319585	0.250665	0	-0.44259	0.422833	-0.386798	-0.194293	0.379925	0	0.60693	0.17786	0.6501	0.465228	-0.63966	-0.59163	-0.211655	-0.47704	0.637575	0.58302	-0.51852	-0.39361	-0.255563	0.47721	0.392242	0.194818	0.50322	-0.39169	0.16257	0.50586	0.23119	0.16571	-0.502047	-0.154365	0	0.367255	-0.368735	0.544068	-0.585017	-0.164005	-0.580242	0.499503	0.257273
OXIBENDAZOLE	-0.49808	-0.41781	-0.454425	0.03415	0.27898	0.20896	-0.346558	-0.26933	0.410828	-0.163007	-0.372582	0	-0.357397	-0.15967	0.457493	-0.140555	0.535048	0.13114	0.480985	0.23407	-0.56588	-0.532813	-0.224697	-0.442142	0.642302	0.200205	-0.600445	-0.19574	0	0	0.151	0	0.139985	-0.527478	-0.131725	-0.219708	-0.22182	0.405728	-0.427	-0.397823	0.422335	-0.210592	0	0	-0.23266	-0.217145	-0.454778	0	0.203363
PROGESTERONE	-0.384692	0.3611	0.217685	0.17242	0.31889	0.342027	0	0.42344	0.212723	0.72939	0	0.36914	-0.257837	0.253267	0	0	0.387215	0	0.369932	0.425818	-0.43132	-0.39476	-0.21754	-0.173613	0.137502	0.457753	-0.451755	-0.1964	-0.142272	0.467728	-0.11501	0	0.385805	0.388962	0.15578	0.107813	0	0	-0.361347	0.379107	0	0	0.120688	0.424165	-0.47147	0	-0.421588	0	0
NICOTINAMIDE	0.16755	0.155645	0.413785	0.206107	-0.398668	0.292822	0.122268	0.207687	-0.155455	0.707845	0.263175	0.15442	0.430065	0.53787	-0.351818	0.174203	-0.468847	0.441692	-0.517787	0.50714	0.46463	0.502478	-0.29946	0.459892	-0.450937	0.22163	0.519413	0.388755	0	-0.163667	-0.382455	0.229368	-0.378795	0.239077	0.48033	0.343225	-0.342175	-0.302663	0.502112	0.625718	-0.174262	0	0.302907	0	0	0.288565	0.553042	-0.138297	0.19195
DEXAMETHASONE	-0.4728	0	-0.445398	0.139467	0.1909	-0.108832	-0.235792	0	0.227538	0.26764	0	-0.112623	-0.317765	0.227348	0.129328	-0.1647	0.515768	0	0.438515	0.178858	-0.482535	-0.528258	-0.120802	-0.214735	0.513153	0	-0.608733	-0.203123	-0.32718	0	0	0.220513	0.41648	0	0.16107	0	0.15261	0.28803	-0.432107	-0.188722	0	-0.184748	0	0	-0.246422	0	-0.477517	0	0.23588
VALPROICACID	0.408062	-0.412585	-0.399352	0	-0.442645	-0.170992	0	-0.145787	-0.414812	-0.299733	0.2135	-0.159135	0.14825	0.198035	-0.275162	0	-0.399838	0.429797	0.367453	0.394305	0.522253	0.47174	0.187183	0.43606	0	0	0.571048	0.513585	0.131935	-0.522875	0	-0.152287	0	0.191235	0	0.149075	0.264107	0.261435	0.140022	-0.450618	-0.460828	-0.16777	0.323667	-0.153142	0.16015	-0.150133	0.617375	-0.187485	-0.28104
ETACRYNICACID	0.15138	-0.15905	-0.15214	-0.157675	-0.436327	0.193323	-0.0378025	-0.212135	0.14089	0	0.153425	0.148627	-0.341637	0	0	0	0.33713	0.309955	0	0.200563	-0.12502	0	0	0.38939	0.46437	0.378177	0	0.13191	0.11246	-0.433405	-0.35419	0.394417	0	0	0.152723	0.169263	-0.202615	0.281423	0	0	0	0	0	0	0	-0.21166	0.400282	-0.184932	0
PYRIMETHAMINE	-0.401407	0	-0.216073	0.0939275	0.391185	0.22028	0	0	0.373845	-0.428368	-0.18835	0.434922	-0.380065	-0.33406	0.158663	0.173363	0.63903	-0.186367	0.733842	0.157775	-0.499003	-0.655822	0	-0.564075	0.585285	0.5507	-0.655852	-0.201327	-0.39112	0.184405	0.410513	0.603842	0.59549	-0.185655	-0.190862	0.219147	0.516895	0.160513	-0.20233	-0.458172	0.227112	0	0	0.514528	-0.218245	0.157128	-0.621555	0.543415	0.565555
METHYLPREDNISOLONE	0.478305	0.350633	-0.520015	-0.409697	-0.156452	0.192692	0.435827	0	0	0.190137	0.11368	0.207613	0	0.15908	0.494947	0.34	0.190345	0.421212	0.147393	0.222725	0.49303	0.38997	0.628683	0.20062	0.373485	0	0.58902	0.42254	0.132035	-0.382802	0.388695	0.207815	0.381655	0.15939	0.452182	0.186738	0.516975	0.46901	0	0.173132	0.400952	0.403035	0.42216	0.184133	0.50318	0.154927	0.572117	0	0.249475
RITONAVIR	0.265735	0.6143	0.55958	-0.44894	0	0.305665	0.175652	0.0027825	-0.44687	0.388855	0.148215	0.466012	0	0	-0.359645	0.45122	0	-0.584005	0	0	0.500162	-0.111272	0.405948	0.262873	-0.508443	0	0.17186	-0.344317	0.34884	0.462967	-0.127637	0.130933	0	0.156345	0.361967	0.390352	0.198213	0	0.200545	0.176437	0.168832	0	0.218087	0.14838	0	0.628085	0	0.40664	0.197843
AMSACRINE	0.18043	0.45523	0	-0.152645	-0.338713	0.576585	0	0.35537	-0.213328	0.18314	0.115907	0.621575	0.346322	0.34365	-0.376505	0.236127	0	-0.222715	-0.231783	0.652185	0.506175	0	0.483953	0.171058	-0.382557	0.784282	0	0.163688	0.182405	-0.153438	-0.150325	0.858267	0.167907	0.185665	0.241735	0	0.446445	-0.11489	0.704695	0.15282	0.235792	0	0.572555	0.699542	0	0.38752	0.206467	0.734395	0.81136
[truncated: 170 more columns]

## Sheet: E.DrugERank_CTRP
	ABT737	AC55649	AFATINIB	AGK2	ALISERTIB	ALVOCIDIB	AM580	APICIDIN	AT7867	AXITINIB	AZACITIDINE	AZD1480	AZD6482	AZD8055	BARASERTIB	BELINOSTAT	BI2536	BIBR1532	BIX01294	BMS345541	BMS536924	BMS754807	BORTEZOMIB	BOSUTINIB	BRDK88742110	BRIVANIB	CANERTINIB	CAY10618	CD1530	CD437	CEDIRANIB	CICLOPIROX	CRIZOTINIB	DABRAFENIB	DASATINIB	DECITABINE	DOXORUBICIN	ENTINOSTAT	ERLOTINIB	ETOPOSIDE	EX527	FLUOROURACIL	FLUVASTATIN	FORETINIB	FULVESTRANT	GDC0879	GDC0941	GEFITINIB	GEMCITABINE
ABT737	0	-0.0017931	0.356966	0.0957241	-0.00758621	0.250069	-0.00234483	0.304276	0.318621	0.157793	0.0937931	0.149517	0.14731	0.0962759	0.513103	0.258069	0.097931	0.0497931	0.361931	0.202897	0.24869	0.302345	-0.00648276	0.249793	0.0948966	0.357241	0.205931	0.312	0.0453793	0.0448276	0.313931	0.102621	0.361655	0.36469	0.628276	0.0495172	0.152552	0.0456552	0.0426207	0.0503448	0.415862	-0.004	0.411448	0.313379	0.311172	0.569655	0.259172	0.195448	0.202897
AC55649	-0.0017931	0	-0.0551724	0.153931	-0.0551724	0.158621	0.371586	-0.0551724	0.101517	0.0558621	0.0492414	-0.0551724	-0.0062069	-0.00206897	-0.0551724	0.0564138	-0.0551724	0.310345	-0.00482759	-0.00482759	-0.00206897	-0.0551724	-0.0551724	-0.0551724	0.213103	0.0508966	-0.00565517	-0.00206897	0.896138	0.89669	-0.0551724	-0.00317241	-0.0551724	0.0564138	-0.00317241	-0.00510345	0.153655	-0.0551724	0.0448276	-0.00206897	0.254207	0.0528276	0.212276	-0.00372414	-0.00234483	0.154759	0.0522759	-0.0551724	-0.0551724
AFATINIB	0.356966	-0.0551724	0	0.202069	0.0464828	0.144	-0.0551724	0.196276	0.197379	0.0453793	0.0957241	0.0948966	0.151724	0.258069	0.514207	0.0935172	-0.00565517	-0.00786207	0.310621	0.0948966	0.202621	0.253103	-0.00703448	0.354759	0.088	0.355862	0.630483	0.203448	-0.00372414	-0.004	0.568276	0.144276	0.409241	0.195448	0.356966	0.0442759	0.0431724	-0.0062069	0.427448	-0.0551724	0.309241	-0.0551724	0.302621	0.510069	0.196276	0.302069	0.254759	0.624414	0.144828
AGK2	0.0957241	0.153931	0.202069	0	0.0968276	0.105103	0.214483	-0.00786207	0.206759	0.210621	0.0448276	-0.00813793	0.0473103	0.25669	0.0431724	0.0544828	-0.0551724	0.262483	0.14869	0.102621	0.15669	0.0415172	-0.0551724	0.045931	0.261103	0.0995862	0.0971034	0.148414	0.202345	0.201793	0.142069	-0.00455172	0.144552	0.206207	0.050069	-0.00317241	0.204	0.213655	0.196552	-0.000137931	0.198483	0.212276	0.202621	0.149241	0.0442759	0.260552	0.263034	0.0448276	0.0390345
ALISERTIB	-0.00758621	-0.0551724	0.0464828	0.0968276	0	-0.00703448	0.257517	-0.0551724	-0.0551724	0.612276	0.0957241	0.67931	0.370483	0.0484138	-0.0551724	-0.0551724	0.0448276	-0.0551724	-0.0551724	0.365793	0.261655	0.159724	-0.0551724	-0.00427586	-0.0551724	-0.00648276	-0.00593103	0.0943448	-0.0551724	-0.0551724	-0.00648276	-0.0551724	-0.00648276	-0.00731034	-0.0551724	0.105103	-0.0551724	0.261103	-0.00455172	-0.00482759	-0.0551724	0.199862	-0.0551724	-0.00593103	-0.0551724	-0.00703448	0.196276	-0.0062069	0.310345
ALVOCIDIB	0.250069	0.158621	0.144	0.105103	-0.00703448	0	0.0508966	0.0428966	0.669379	0.154483	0.0993103	0.0456552	0.250621	0.318069	0.0467586	0.207034	0.302621	0.100414	0.358345	0.150069	0.206483	0.144828	-0.0551724	0.0902069	0.151172	0.0995862	0.254759	0.366621	0.159172	0.158897	0.100414	-0.00593103	0.0464828	0.258621	0.249241	0.103172	0.256966	-0.00317241	0.0462069	0.264414	0.403448	0.0495172	0.465793	0.253655	0.200414	0.352552	0.202897	0.14869	0.0451034
AM580	-0.00234483	0.371586	-0.0551724	0.214483	0.257517	0.0508966	0	-0.0551724	0.0517241	0.459448	-0.00344828	0.256414	0.155586	0.0484138	-0.0551724	0.0555862	-0.0551724	0.32	-0.0551724	0.103724	0.100414	0.148414	-0.0551724	-0.0551724	0.0544828	-0.0017931	-0.0551724	0.0473103	0.371586	0.371862	-0.0551724	-0.00372414	-0.00289655	0.107034	-0.0551724	0.0973793	0.0506207	0.317517	0.0478621	-0.0551724	0.0998621	0.367172	0.106759	-0.0551724	-0.0551724	0.105931	0.0514483	-0.0551724	0.146759
APICIDIN	0.304276	-0.0551724	0.196276	-0.00786207	-0.0551724	0.0428966	-0.0551724	0	0.14731	0.0470345	0.044	0.0962759	-0.00565517	-0.0551724	0.256966	-0.00427586	-0.00317241	-0.00537931	0.145931	0.0973793	0.199862	0.144552	0.257241	0.0926897	-0.00758621	0.156414	0.0451034	0.0998621	-0.0551724	-0.0551724	0.148966	0.0478621	0.149241	0.150345	0.256414	0.0995862	0.0456552	-0.0551724	-0.0551724	-0.0551724	0.266897	-0.0551724	0.20069	0.0990345	0.194621	0.301793	0.0971034	-0.00648276	0.097931
AT7867	0.318621	0.101517	0.197379	0.206759	-0.0551724	0.669379	0.0517241	0.14731	0	0.210069	0.149517	0.0506207	0.142897	0.302621	0.15531	0.15531	0.203172	0.158069	0.560276	0.204276	0.146759	0.201517	-0.0551724	0.144828	0.108138	0.152276	0.295724	0.463034	0.101793	0.101517	0.204276	0.0475862	0.206759	0.260552	0.36	0.101517	0.205655	0.0536552	0.0921379	0.199586	0.361103	0.0497931	0.464414	0.299862	0.357517	0.527172	0.209793	0.0998621	0.150621
AXITINIB	0.157793	0.0558621	0.0453793	0.210621	0.612276	0.154483	0.459448	0.0470345	0.210069	0	0.0428966	0.716138	0.149793	-0.0551724	0.0987586	0.157793	0.0417931	0.163034	0.0982069	0.250069	0.144276	0.288828	-0.0551724	0.0437241	0.0561379	0.0489655	0.0451034	0.10069	0.0564138	0.0561379	0.0968276	-0.00344828	0.0976552	0.213379	0.0993103	0.145931	0.106483	0.252276	0.0492414	-0.00648276	0.157241	0.306207	0.20869	0.0470345	0.0976552	0.261655	0.158897	-0.0062069	0.343172
AZACITIDINE	0.0937931	0.0492414	0.0957241	0.0448276	0.0957241	0.0993103	-0.00344828	0.044	0.149517	0.0428966	0	0.0470345	0.244552	0.152552	0.147586	-0.00675862	0.150069	-0.0551724	0.152552	0.251448	0.197379	0.203172	-0.00813793	0.0943448	0.0442759	0.203724	0.198207	0.345103	0.0984828	0.0982069	0.149793	-0.0551724	0.146207	0.094069	0.14731	0.582621	0.0951724	-0.00372414	0.0462069	0.0475862	0.201517	0.205103	0.254483	0.201241	-0.00455172	0.148138	0.0863448	0.194897	0.513931
AZD1480	0.149517	-0.0551724	0.0948966	-0.00813793	0.67931	0.0456552	0.256414	0.0962759	0.0506207	0.716138	0.0470345	0	0.37269	0.00124138	0.203448	-0.00206897	0.147586	-0.00317241	0.102345	0.414483	0.305655	0.466069	-0.00675862	-0.00289655	-0.00703448	0.150069	0.0448276	0.102897	-0.0551724	-0.0551724	0.0968276	0.0456552	0.153931	0.149793	0.200138	0.209241	0.0484138	0.207862	-0.0551724	-0.00565517	0.000137931	0.0990345	0.0962759	0.097931	0.0951724	0.143724	0.205103	0.0426207	0.311724
AZD6482	0.14731	-0.0062069	0.151724	0.0473103	0.370483	0.250621	0.155586	-0.00565517	0.142897	0.149793	0.244552	0.37269	0	0.355034	0.202345	-0.0551724	0.105379	-0.0551724	0.249241	0.474345	0.468552	0.318621	-0.0062069	0.0470345	0.0910345	0.206207	0.197931	0.25531	-0.00565517	-0.00565517	0.097931	-0.00537931	0.154483	0.0478621	0.207586	0.254759	0.143448	0.215586	0.050069	0.197103	0.0404138	0.200966	0.143724	0.248966	0.0451034	0.0946207	0.306207	0.245103	0.258345
AZD8055	0.0962759	-0.00206897	0.258069	0.25669	0.0484138	0.318069	0.0484138	-0.0551724	0.302621	-0.0551724	0.152552	0.00124138	0.355034	0	0.206759	-0.00234483	0.104	0.0478621	0.523586	0.154759	0.317793	0.110345	-0.0551724	0.202069	0.0470345	0.314759	0.413103	0.313379	0.0503448	0.050069	0.258345	-0.00675862	0.252828	0.097931	0.151448	0.0511724	0.25531	0.0995862	0.255586	0.263034	0.301793	-0.00289655	0.365241	0.360552	-0.0551724	0.0998621	0.262483	0.408966	-0.00427586
BARASERTIB	0.513103	-0.0551724	0.514207	0.0431724	-0.0551724	0.0467586	-0.0551724	0.256966	0.15531	0.0987586	0.147586	0.203448	0.202345	0.206759	0	0.0971034	0.0442759	-0.00427586	0.419724	0.259172	0.308414	0.409517	-0.00510345	0.357241	-0.00537931	0.469103	0.576552	0.207586	-0.00565517	-0.00593103	0.537655	0.150345	0.51531	0.307034	0.518621	0.10069	0.149793	-0.00455172	0.311448	-0.00482759	0.315034	-0.0551724	0.360828	0.580138	0.247034	0.357517	0.253379	0.521379	0.199034
BELINOSTAT	0.258069	0.0564138	0.0935172	0.0544828	-0.0551724	0.207034	0.0555862	-0.00427586	0.15531	0.157793	-0.00675862	-0.00206897	-0.0551724	-0.00234483	0.0971034	0	-0.00758621	0.105103	0.102621	-0.0062069	-0.0551724	0.0417931	-0.0551724	0.089931	0.0566897	0.100138	0.147034	0.0470345	0.0569655	0.0566897	0.152	-0.00593103	0.0448276	0.374897	0.044	0.0437241	0.104552	-0.00344828	0.0968276	0.105931	0.207034	0.0542069	0.157793	0.147586	0.0467586	0.152828	0.209517	0.101793	0.0434483
BI2536	0.097931	-0.0551724	-0.00565517	-0.0551724	0.0448276	0.302621	-0.0551724	-0.00317241	0.203172	0.0417931	0.150069	0.147586	0.105379	0.104	0.0442759	-0.00758621	0	-0.0551724	0.0486897	-0.00317241	0.0511724	0.250897	-0.0551724	-0.00786207	-0.00372414	0.245931	-0.00565517	0.150345	-0.0551724	-0.0551724	-0.00510345	-0.0551724	0.044	0.0423448	0.145655	0.0517241	0.000689655	-0.00206897	-0.0551724	0.10069	0.0467586	-0.00124138	0.0467586	0.0475862	0.0976552	0.148966	0.0533793	0.0445517	0.144552
BIBR1532	0.0497931	0.310345	-0.00786207	0.262483	-0.0551724	0.100414	0.32	-0.00537931	0.158069	0.163034	-0.0551724	-0.00317241	-0.0551724	0.0478621	-0.00427586	0.105103	-0.0551724	0	0.0484138	0.0475862	-0.0551724	-0.00675862	-0.0551724	-0.00758621	0.161931	-0.00124138	-0.00813793	0.0965517	0.360828	0.360552	-0.00565517	0.0415172	0.0484138	0.159448	-0.00675862	-0.00482759	0.202345	0.163586	0.096	-0.0551724	0.150069	0.315586	0.104276	-0.00786207	0.0481379	0.209517	0.154759	-0.0551724	-0.00510345
BIX01294	0.361931	-0.00482759	0.310621	0.14869	-0.0551724	0.358345	-0.0551724	0.145931	0.560276	0.0982069	0.152552	0.102345	0.249241	0.523586	0.419724	0.102621	0.0486897	0.0484138	0	0.305379	0.147586	0.308966	-0.0551724	0.304552	-0.000137931	0.267724	0.416138	0.413103	0.0478621	0.0475862	0.373793	0.0484138	0.360552	0.262483	0.411448	0.0489655	0.257241	-0.00124138	0.211448	0.14731	0.41669	-0.0551724	0.466069	0.464414	0.299034	0.310897	0.256138	0.270759	0.199862
BMS345541	0.202897	-0.00482759	0.0948966	0.102621	0.365793	0.150069	0.103724	0.0973793	0.204276	0.250069	0.251448	0.414483	0.474345	0.154759	0.259172	-0.0062069	-0.00317241	0.0475862	0.305379	0	0.468828	0.368828	-0.00482759	0.0453793	0.0517241	0.106759	0.194069	0.412276	-0.00427586	-0.00427586	0.152552	0.089931	0.314207	0.208138	0.312552	0.256138	0.203724	0.215034	-0.00234483	0.0481379	0.097931	0.148414	0.253931	0.30069	0.143724	0.256138	0.357241	0.100414	0.306207
BMS536924	0.24869	-0.00206897	0.202621	0.15669	0.261655	0.206483	0.100414	0.199862	0.146759	0.144276	0.197379	0.305655	0.468552	0.317793	0.308414	-0.0551724	0.0511724	-0.0551724	0.147586	0.468828	0	0.308966	-0.00510345	0.0987586	0.0470345	0.261931	0.302897	0.259172	-0.00151724	-0.00151724	0.204	-0.00731034	0.203448	0.148414	0.312276	0.255586	0.15669	0.256138	0.149793	0.16	0.25531	0.0473103	0.350345	0.310897	0.089931	0.247862	0.26	0.304	0.152
BMS754807	0.302345	-0.0551724	0.253103	0.0415172	0.159724	0.144828	0.148414	0.144552	0.201517	0.288828	0.203172	0.466069	0.318621	0.110345	0.409517	0.0417931	0.250897	-0.00675862	0.308966	0.368828	0.308966	0	-0.00344828	0.197103	-0.00372414	0.41669	0.201793	0.311724	-0.004	-0.00427586	0.256414	0.0428966	0.308966	0.203172	0.455862	0.204276	0.101793	0.152	0.0514483	-0.0551724	0.20731	0.094069	0.305103	0.310897	0.193517	0.251448	0.153655	0.205103	0.346207
BORTEZOMIB	-0.00648276	-0.0551724	-0.00703448	-0.0551724	-0.0551724	-0.0551724	-0.0551724	0.257241	-0.0551724	-0.0551724	-0.00813793	-0.00675862	-0.0062069	-0.0551724	-0.00510345	-0.0551724	-0.0551724	-0.0551724	-0.0551724	-0.00482759	-0.00510345	-0.00344828	0	-0.0551724	-0.00813793	0.045931	-0.0551724	-0.00565517	-0.0551724	-0.0551724	-0.00648276	-0.0551724	-0.00344828	-0.0062069	-0.004	-0.00675862	-0.00841379	-0.00731034	-0.0551724	-0.0551724	-0.0551724	-0.0551724	-0.0551724	-0.00482759	-0.0551724	-0.00841379	-0.00758621	-0.00703448	-0.0551724
BOSUTINIB	0.249793	-0.0551724	0.354759	0.045931	-0.00427586	0.0902069	-0.0551724	0.0926897	0.144828	0.0437241	0.0943448	-0.00289655	0.0470345	0.202069	0.357241	0.089931	-0.00786207	-0.00758621	0.304552	0.0453793	0.0987586	0.197103	-0.0551724	0	-0.0551724	0.300414	0.454207	0.198207	-0.00565517	-0.00593103	0.613655	0.0932414	0.296828	0.145103	0.244	0.0428966	0.0467586	-0.00344828	0.305379	-0.0551724	0.250621	-0.0551724	0.250345	0.510621	0.190759	0.198759	0.0987586	0.302897	0.140414
BRDK88742110	0.0948966	0.213103	0.088	0.261103	-0.0551724	0.151172	0.0544828	-0.00758621	0.108138	0.0561379	0.0442759	-0.00703448	0.0910345	0.0470345	-0.00537931	0.0566897	-0.00372414	0.161931	-0.000137931	0.0517241	0.0470345	-0.00372414	-0.00813793	-0.0551724	0	0.151724	-0.0551724	0.0453793	0.213103	0.212828	0.0398621	0.0475862	0.0511724	0.105655	0.0451034	-0.00703448	0.255862	0.000413793	0.0481379	-0.00289655	0.251724	0.0531034	0.204552	0.0417931	0.00124138	0.207586	0.155034	0.0401379	-0.0551724
BRIVANIB	0.357241	0.0508966	0.355862	0.0995862	-0.00648276	0.0995862	-0.0017931	0.156414	0.152276	0.0489655	0.203724	0.150069	0.206207	0.314759	0.469103	0.100138	0.245931	-0.00124138	0.267724	0.106759	0.261931	0.41669	0.045931	0.300414	0.151724	0	0.358897	0.15669	0.101517	0.100966	0.367172	0.0929655	0.359724	0.255862	0.410069	0.0481379	0.208966	-0.0551724	0.305103	0.000689655	0.41531	-0.00344828	0.464414	0.420276	0.0935172	0.305655	0.156966	0.464414	0.094069
CANERTINIB	0.205931	-0.00565517	0.630483	0.0971034	-0.00593103	0.254759	-0.0551724	0.0451034	0.295724	0.0451034	0.198207	0.0448276	0.197931	0.413103	0.576552	0.147034	-0.00565517	-0.00813793	0.416138	0.194069	0.302897	0.201793	-0.0551724	0.454207	-0.0551724	0.358897	0	0.306759	0.0462069	0.045931	0.682621	0.141793	0.403448	0.199862	0.300966	0.146759	0.0993103	-0.00510345	0.526345	0.0995862	0.304	-0.0551724	0.405379	0.722483	0.141793	0.201241	0.197103	0.735724	0.143448
CAY10618	0.312	-0.00206897	0.203448	0.148414	0.0943448	0.366621	0.0473103	0.0998621	0.463034	0.10069	0.345103	0.102897	0.25531	0.313379	0.207586	0.0470345	0.150345	0.0965517	0.413103	0.412276	0.259172	0.311724	-0.00565517	0.198207	0.0453793	0.15669	0.306759	0	0.0473103	0.0470345	0.206759	-0.00289655	0.30731	0.207034	0.363862	0.155862	0.205103	0.102621	0.0943448	0.106759	0.312	0.0946207	0.423586	0.360828	0.158897	0.408414	0.301793	0.20069	0.193241
CD1530	0.0453793	0.896138	-0.00372414	0.202345	-0.0551724	0.159172	0.371586	-0.0551724	0.101793	0.0564138	0.0984828	-0.0551724	-0.00565517	0.0503448	-0.00565517	0.0569655	-0.0551724	0.360828	0.0478621	-0.00427586	-0.00151724	-0.004	-0.0551724	-0.00565517	0.213103	0.101517	0.0462069	0.0473103	0	0.999448	-0.00427586	-0.00317241	-0.00648276	0.0569655	-0.00262069	-0.00455172	0.154483	-0.0551724	0.0932414	-0.00151724	0.304828	0.053931	0.262483	0.0478621	-0.00262069	0.155586	0.0528276	-0.00455172	-0.00813793
CD437	0.0448276	0.89669	-0.004	0.201793	-0.0551724	0.158897	0.371862	-0.0551724	0.101517	0.0561379	0.0982069	-0.0551724	-0.00565517	0.050069	-0.00593103	0.0566897	-0.0551724	0.360552	0.0475862	-0.00427586	-0.00151724	-0.00427586	-0.0551724	-0.00593103	0.212828	0.100966	0.045931	0.0470345	0.999448	0	-0.00455172	-0.00317241	-0.00675862	0.0566897	-0.00262069	-0.00455172	0.154207	-0.0551724	0.0926897	-0.00151724	0.304276	0.0536552	0.261931	0.0475862	-0.00262069	0.15531	0.0525517	-0.00482759	-0.00841379
CEDIRANIB	0.313931	-0.0551724	0.568276	0.142069	-0.00648276	0.100414	-0.0551724	0.148966	0.204276	0.0968276	0.149793	0.0968276	0.097931	0.258345	0.537655	0.152	-0.00510345	-0.00565517	0.373793	0.152552	0.204	0.256414	-0.00648276	0.613655	0.0398621	0.367172	0.682621	0.206759	-0.00427586	-0.00455172	0	0.10069	0.461103	0.309517	0.310621	0.0984828	0.0993103	0.0431724	0.466621	-0.0551724	0.263034	-0.0551724	0.261379	0.731034	0.14869	0.258069	0.252	0.583448	0.198483
CICLOPIROX	0.102621	-0.00317241	0.144276	-0.00455172	-0.0551724	-0.00593103	-0.00372414	0.0478621	0.0475862	-0.00344828	-0.0551724	0.0456552	-0.00537931	-0.00675862	0.150345	-0.00593103	-0.0551724	0.0415172	0.0484138	0.089931	-0.00731034	0.0428966	-0.0551724	0.0932414	0.0475862	0.0929655	0.141793	-0.00289655	-0.00317241	-0.00317241	0.10069	0	0.148414	0.151724	0.14869	-0.004	0.0484138	-0.0551724	-0.0551724	-0.000689655	0.0495172	-0.00317241	0.0957241	0.14731	0.143172	0.100138	-0.00482759	0.0401379	0.0470345
CRIZOTINIB	0.361655	-0.0551724	0.409241	0.144552	-0.00648276	0.0464828	-0.00289655	0.149241	0.206759	0.0976552	0.146207	0.153931	0.154483	0.252828	0.51531	0.0448276	0.044	0.0484138	0.360552	0.314207	0.203448	0.308966	-0.00344828	0.296828	0.0511724	0.359724	0.403448	0.30731	-0.00648276	-0.00675862	0.461103	0.148414	0	0.302621	0.418069	0.0511724	0.200414	-0.00124138	0.151172	-0.00455172	0.252828	-0.0551724	0.358621	0.463586	0.245103	0.359724	0.305379	0.353655	0.192966
DABRAFENIB	0.36469	0.0564138	0.195448	0.206207	-0.00731034	0.258621	0.107034	0.150345	0.260552	0.213379	0.094069	0.149793	0.0478621	0.097931	0.307034	0.374897	0.0423448	0.159448	0.262483	0.208138	0.148414	0.203172	-0.0062069	0.145103	0.105655	0.255862	0.199862	0.207034	0.0569655	0.0566897	0.309517	0.151724	0.302621	0	0.258345	0.0495172	0.256138	0.0481379	0.202897	0.152552	0.312828	0.105379	0.317241	0.252828	0.20069	0.358897	0.413931	0.152828	0.148966
DASATINIB	0.628276	-0.00317241	0.356966	0.050069	-0.0551724	0.249241	-0.0551724	0.256414	0.36	0.0993103	0.14731	0.200138	0.207586	0.151448	0.518621	0.044	0.145655	-0.00675862	0.411448	0.312552	0.312276	0.455862	-0.004	0.244	0.0451034	0.410069	0.300966	0.363862	-0.00262069	-0.00262069	0.310621	0.14869	0.418069	0.258345	0	0.100138	0.205655	-0.0551724	-0.00510345	0.0536552	0.362483	-0.0551724	0.464138	0.466345	0.408414	0.515586	0.153931	0.248138	0.150897
DECITABINE	0.0495172	-0.00510345	0.0442759	-0.00317241	0.105103	0.103172	0.0973793	0.0995862	0.101517	0.145931	0.582621	0.209241	0.254759	0.0511724	0.10069	0.0437241	0.0517241	-0.00482759	0.0489655	0.256138	0.255586	0.204276	-0.00675862	0.0428966	-0.00703448	0.0481379	0.146759	0.155862	-0.00455172	-0.00455172	0.0984828	-0.004	0.0511724	0.0495172	0.100138	0	0.0993103	0.0993103	-0.00896552	0.0506207	0.0484138	0.202621	0.103172	0.14869	-0.00151724	0.0948966	0.0462069	0.0954483	0.532414
DOXORUBICIN	0.152552	0.153655	0.0431724	0.204	-0.0551724	0.256966	0.0506207	0.0456552	0.205655	0.106483	0.0951724	0.0484138	0.143448	0.25531	0.149793	0.104552	0.000689655	0.202345	0.257241	0.203724	0.15669	0.101793	-0.00841379	0.0467586	0.255862	0.208966	0.0993103	0.205103	0.154483	0.154207	0.0993103	0.0484138	0.200414	0.256138	0.205655	0.0993103	0	-0.00344828	0.144	0.359724	0.354207	0.0492414	0.31531	0.150897	0.155862	0.250897	0.247862	0.147034	-0.00151724
ENTINOSTAT	0.0456552	-0.0551724	-0.0062069	0.213655	0.261103	-0.00317241	0.317517	-0.0551724	0.0536552	0.252276	-0.00372414	0.207862	0.215586	0.0995862	-0.00455172	-0.00344828	-0.00206897	0.163586	-0.00124138	0.215034	0.256138	0.152	-0.00731034	-0.00344828	0.000413793	-0.0551724	-0.00510345	0.102621	-0.0551724	-0.0551724	0.0431724	-0.0551724	-0.00124138	0.0481379	-0.0551724	0.0993103	-0.00344828	0	0.0448276	-0.0551724	-0.0551724	0.26469	-0.0062069	0.044	-0.0551724	0.108138	0.104	-0.00455172	0.152
ERLOTINIB	0.0426207	0.0448276	0.427448	0.196552	-0.00455172	0.0462069	0.0478621	-0.0551724	0.0921379	0.0492414	0.0462069	-0.0551724	0.050069	0.255586	0.311448	0.0968276	-0.0551724	0.096	0.211448	-0.00234483	0.149793	0.0514483	-0.0551724	0.305379	0.0481379	0.305103	0.526345	0.0943448	0.0932414	0.0926897	0.466621	-0.0551724	0.151172	0.202897	-0.00510345	-0.00896552	0.144	0.0448276	0	-0.0551724	0.242621	0.045931	0.149517	0.303448	-0.00344828	0.0473103	0.15531	0.630759	-0.00703448
ETOPOSIDE	0.0503448	-0.00206897	-0.0551724	-0.000137931	-0.00482759	0.264414	-0.0551724	-0.0551724	0.199586	-0.00648276	0.0475862	-0.00565517	0.197103	0.263034	-0.00482759	0.105931	0.10069	-0.0551724	0.14731	0.0481379	0.16	-0.0551724	-0.0551724	-0.0551724	-0.00289655	0.000689655	0.0995862	0.106759	-0.00151724	-0.00151724	-0.0551724	-0.000689655	-0.00455172	0.152552	0.0536552	0.0506207	0.359724	-0.0551724	-0.0551724	0	0.0489655	-0.0551724	0.154207	0.0508966	-0.000413793	-0.00234483	0.151448	0.0473103	-0.00565517
EX527	0.415862	0.254207	0.309241	0.198483	-0.0551724	0.403448	0.0998621	0.266897	0.361103	0.157241	0.201517	0.000137931	0.0404138	0.301793	0.315034	0.207034	0.0467586	0.150069	0.41669	0.097931	0.25531	0.20731	-0.0551724	0.250621	0.251724	0.41531	0.304	0.312	0.304828	0.304276	0.263034	0.0495172	0.252828	0.312828	0.362483	0.0484138	0.354207	-0.0551724	0.242621	0.0489655	0	0.0495172	0.724414	0.309517	0.261103	0.472138	0.101241	0.251448	0.151724
FLUOROURACIL	-0.004	0.0528276	-0.0551724	0.212276	0.199862	0.0495172	0.367172	-0.0551724	0.0497931	0.306207	0.205103	0.0990345	0.200966	-0.00289655	-0.0551724	0.0542069	-0.00124138	0.315586	-0.0551724	0.148414	0.0473103	0.094069	-0.0551724	-0.0551724	0.0531034	-0.00344828	-0.0551724	0.0946207	0.053931	0.0536552	-0.0551724	-0.00317241	-0.0551724	0.105379	-0.0551724	0.202621	0.0492414	0.26469	0.045931	-0.0551724	0.0495172	0	0.0514483	-0.0551724	-0.0551724	0.104276	0.147586	-0.0551724	0.301241
FLUVASTATIN	0.411448	0.212276	0.302621	0.202621	-0.0551724	0.465793	0.106759	0.20069	0.464414	0.20869	0.254483	0.0962759	0.143724	0.365241	0.360828	0.157793	0.0467586	0.104276	0.466069	0.253931	0.350345	0.305103	-0.0551724	0.250345	0.204552	0.464414	0.405379	0.423586	0.262483	0.261931	0.261379	0.0957241	0.358621	0.317241	0.464138	0.103172	0.31531	-0.0062069	0.149517	0.154207	0.724414	0.0514483	0	0.363862	0.250345	0.467724	0.205103	0.300414	0.197655
FORETINIB	0.313379	-0.00372414	0.510069	0.149241	-0.00593103	0.253655	-0.0551724	0.0990345	0.299862	0.0470345	0.201241	0.097931	0.248966	0.360552	0.580138	0.147586	0.0475862	-0.00786207	0.464414	0.30069	0.310897	0.310897	-0.00482759	0.510621	0.0417931	0.420276	0.722483	0.360828	0.0478621	0.0475862	0.731034	0.14731	0.463586	0.252828	0.466345	0.14869	0.150897	0.044	0.303448	0.0508966	0.309517	-0.0551724	0.363862	0	0.195724	0.309793	0.196276	0.520552	0.148138
FULVESTRANT	0.311172	-0.00234483	0.196276	0.0442759	-0.0551724	0.200414	-0.0551724	0.194621	0.357517	0.0976552	-0.00455172	0.0951724	0.0451034	-0.0551724	0.247034	0.0467586	0.0976552	0.0481379	0.299034	0.143724	0.089931	0.193517	-0.0551724	0.190759	0.00124138	0.0935172	0.141793	0.158897	-0.00262069	-0.00262069	0.14869	0.143172	0.245103	0.20069	0.408414	-0.00151724	0.155862	-0.0551724	-0.00344828	-0.000413793	0.261103	-0.0551724	0.250345	0.195724	0	0.203724	0.102897	0.0431724	0.144828
GDC0879	0.569655	0.154759	0.302069	0.260552	-0.00703448	0.352552	0.105931	0.301793	0.527172	0.261655	0.148138	0.143724	0.0946207	0.0998621	0.357517	0.152828	0.148966	0.209517	0.310897	0.256138	0.247862	0.251448	-0.00841379	0.198759	0.207586	0.305655	0.201241	0.408414	0.155586	0.15531	0.258069	0.100138	0.359724	0.358897	0.515586	0.0948966	0.250897	0.108138	0.0473103	-0.00234483	0.472138	0.104276	0.467724	0.309793	0.203724	0	0.307862	0.0946207	0.151172
GDC0941	0.259172	0.0522759	0.254759	0.263034	0.196276	0.202897	0.0514483	0.0971034	0.209793	0.158897	0.0863448	0.205103	0.306207	0.262483	0.253379	0.209517	0.0533793	0.154759	0.256138	0.357241	0.26	0.153655	-0.00758621	0.0987586	0.155034	0.156966	0.197103	0.301793	0.0528276	0.0525517	0.252	-0.00482759	0.305379	0.413931	0.153931	0.0462069	0.247862	0.104	0.15531	0.151448	0.101241	0.147586	0.205103	0.196276	0.102897	0.307862	0	0.149793	0.145379
GEFITINIB	0.195448	-0.0551724	0.624414	0.0448276	-0.0062069	0.14869	-0.0551724	-0.00648276	0.0998621	-0.0062069	0.194897	0.0426207	0.245103	0.408966	0.521379	0.101793	0.0445517	-0.0551724	0.270759	0.100414	0.304	0.205103	-0.00703448	0.302897	0.0401379	0.464414	0.735724	0.20069	-0.00455172	-0.00482759	0.583448	0.0401379	0.353655	0.152828	0.248138	0.0954483	0.147034	-0.00455172	0.630759	0.0473103	0.251448	-0.0551724	0.300414	0.520552	0.0431724	0.0946207	0.149793	0	0.0428966
GEMCITABINE	0.202897	-0.0551724	0.144828	0.0390345	0.310345	0.0451034	0.146759	0.097931	0.150621	0.343172	0.513931	0.311724	0.258345	-0.00427586	0.199034	0.0434483	0.144552	-0.00510345	0.199862	0.306207	0.152	0.346207	-0.0551724	0.140414	-0.0551724	0.094069	0.143448	0.193241	-0.00813793	-0.00841379	0.198483	0.0470345	0.192966	0.148966	0.150897	0.532414	-0.00151724	0.152	-0.00703448	-0.00565517	0.151724	0.301241	0.197655	0.148138	0.144828	0.151172	0.145379	0.0428966	0
GMX1778	0.256414	0.053931	0.303172	-0.00841379	-0.0551724	0.257517	-0.0551724	0.0971034	0.307586	0.0451034	0.247586	0.102897	0.103448	0.204828	0.360276	0.0426207	0.101241	-0.00731034	0.250897	0.204828	0.202897	0.311172	-0.00317241	0.24069	0.149793	0.361931	0.401241	0.35669	0.101241	0.100966	0.306483	0.194069	0.360828	0.198207	0.409517	0.100414	0.0973793	-0.0551724	0.044	0.100138	0.302621	-0.0551724	0.45669	0.46469	0.144828	0.310621	0.0982069	0.300966	0.139586
GOSSYPOL	0.094069	0.480966	0.0442759	0.153379	-0.0551724	0.0525517	0.268828	-0.00758621	-0.000689655	0.0566897	0.0910345	-0.00703448	-0.00648276	0.0976552	0.0971034	0.0572414	-0.0551724	0.314483	0.101517	0.0467586	0.0431724	0.10069	-0.00813793	0.0442759	0.258897	0.205931	0.0473103	0.094069	0.480414	0.479862	0.0968276	-0.004	0.0957241	0.157793	0.0445517	-0.00703448	0.251724	-0.0551724	0.196552	-0.0551724	0.252828	0.0536552	0.205931	0.0968276	0.0561379	0.0982069	0.10069	0.145655	-0.00813793
GSK1059615	0.15669	0.0561379	0.0456552	0.268828	0.0453793	0.102621	0.22	-0.00427586	0.159448	0.317793	-0.0551724	0.0932414	-0.0551724	0.0943448	0.0486897	0.269931	-0.0551724	0.320276	0.0486897	0.0954483	-0.0551724	-0.00565517	-0.0551724	0.044	0.110069	0.0484138	0.0451034	0.0973793	0.0566897	0.0564138	0.0475862	0.0442759	0.101517	0.368	0.0451034	-0.00372414	0.154483	0.217517	0.0492414	0.103448	0.103724	0.217793	0.106483	0.0464828	-0.00344828	0.263586	0.259724	-0.00648276	-0.004
GSK461364	0.660552	0.0478621	0.455586	0.248966	0.0946207	0.293241	0.0470345	0.310345	0.205379	0.202897	0.14869	0.203172	0.25669	0.253103	0.570483	0.148414	0.0973793	0.0971034	0.309793	0.315034	0.515586	0.413655	-0.00427586	0.297379	0.145931	0.466345	0.302621	0.316138	0.0984828	0.097931	0.359172	0.0921379	0.464966	0.36331	0.568552	0.0492414	0.250897	0.0478621	0.149793	-0.00344828	0.520828	0.0456552	0.510069	0.409517	0.29931	0.508138	0.364138	0.349517	0.147586
GW843682X	0.556138	0.0533793	0.302897	0.150621	0.152828	0.297103	0.154207	0.248966	0.202897	0.350345	0.153103	0.403448	0.310069	0.208966	0.514483	0.153103	0.196	0.101241	0.362207	0.366345	0.459172	0.567724	-0.00372414	0.197379	0.151724	0.476552	0.204828	0.315034	0.105655	0.105103	0.26	0.0428966	0.312276	0.366621	0.46	0.148414	0.306483	0.103448	0.155862	0.0434483	0.516414	0.150897	0.563862	0.261655	0.194621	0.453931	0.308966	0.309241	0.296552
HLI373	0.151172	-0.0551724	0.205931	0.044	0.26469	0.094069	0.202345	-0.00344828	0.096	0.242345	0.300414	0.268276	0.475724	0.16	0.25531	-0.00703448	0.209241	-0.0551724	0.208966	0.262759	0.21531	0.413931	-0.0551724	0.146759	-0.00289655	0.259724	0.204	0.190483	-0.00565517	-0.00593103	0.157793	0.0451034	0.146207	0.0431724	0.202897	0.206207	0.00151724	0.208414	0.052	0.00151724	0.152	0.352828	0.198207	0.252276	0.0924138	0.0995862	0.147862	0.204276	0.454483
IMATINIB	-0.00813793	-0.00593103	0.150621	0.257241	0.0998621	-0.00262069	-0.0551724	-0.0551724	0.0467586	-0.0551724	0.0935172	-0.00758621	0.0954483	0.307586	0.0962759	-0.0551724	-0.0551724	-0.00289655	0.202897	0.150069	0.250069	0.0982069	-0.0551724	0.202897	-0.000965517	0.200414	0.195448	0.145655	0.0426207	0.0423448	0.147586	-0.00868966	0.198207	-0.004	0.0948966	-0.00593103	0.145103	0.0489655	0.247034	-0.00289655	0.142345	-0.0551724	0.194897	0.197379	-0.00896552	0.0481379	0.16	0.196	-0.00813793
ISONICOTINOHYDROXAMICACID	-0.00234483	0.0544828	-0.0551724	0.154207	0.0965517	0.0511724	0.107586	-0.0551724	0.052	0.153655	-0.00124138	0.042069	-0.0551724	0.0442759	-0.0551724	0.0558621	-0.00758621	0.419172	-0.00317241	0.0954483	-0.0551724	-0.0551724	-0.0551724	-0.0551724	0.21531	-0.0017931	-0.0551724	-0.00675862	0.0555862	0.0553103	-0.0551724	0.0514483	-0.00317241	0.105379	-0.0551724	-0.00124138	0.100966	0.0517241	-0.00372414	-0.00813793	0.0511724	0.358345	0.0531034	-0.0551724	-0.0551724	0.103448	0.103448	-0.0551724	0.0484138
ISOX	0.215862	0.000137931	0.0993103	0.0531034	0.405103	0.207862	0.207862	0.0497931	0.32	0.568276	0.0475862	0.461655	-0.00206897	-0.00262069	0.103172	0.104552	0.101793	0.108414	0.15669	0.0993103	-0.00427586	0.154483	-0.0551724	0.0962759	0.000137931	0.101241	0.097931	0.159172	0.000137931	-0.000137931	0.104276	0.0475862	0.0998621	0.208414	0.208138	0.0506207	0.0536552	0.052	-0.00344828	-0.0551724	0.159448	0.0544828	0.160276	0.153931	0.206759	0.211724	0.0531034	-0.00289655	0.149241
KI8751	0.147862	-0.0551724	0.404276	0.52469	0.097931	-0.00565517	-0.0551724	0.0453793	0.0456552	-0.00317241	0.0451034	-0.00206897	-0.00317241	0.205103	0.200966	-0.00565517	-0.0551724	-0.00675862	0.153379	0.0451034	0.101793	0.0998621	-0.0551724	0.244552	0.0464828	0.195724	0.296	0.0984828	-0.00565517	-0.00593103	0.349793	0.142897	0.296	0.151448	0.142621	-0.00372414	0.0470345	-0.00317241	0.150897	-0.0551724	0.148414	-0.0551724	0.14869	0.298207	0.0434483	0.096	0.204828	0.197655	0.0935172
KU0060648	0.422483	0.102345	0.259172	0.305379	0.152276	0.360276	0.256414	0.151448	0.414207	0.405103	0.200414	0.307586	0.250621	0.309517	0.315586	0.15669	0.152	0.210069	0.364414	0.410897	0.358621	0.411172	-0.00675862	0.202621	0.201793	0.310621	0.307586	0.360552	0.154759	0.154207	0.314759	0.100138	0.363586	0.365517	0.419448	0.250897	0.310069	0.204	0.0464828	0.152552	0.366621	0.201793	0.469103	0.418897	0.154759	0.518621	0.30731	0.201517	0.401793
KU0063794	0.146759	-0.0017931	0.250069	0.209793	0.0462069	0.412552	-0.0551724	0.0409655	0.404	-0.00482759	0.152552	0.052	0.304	0.790069	0.205103	0.0453793	0.155034	0.0453793	0.572138	0.204828	0.366897	0.207862	-0.0551724	0.196552	0.0511724	0.268276	0.40731	0.364138	0.0508966	0.0506207	0.254759	-0.00758621	0.252828	0.0998621	0.201241	0.100966	0.309793	0.0968276	0.251724	0.262483	0.354207	-0.0551724	0.413379	0.357517	0.0442759	0.200966	0.261655	0.360552	0.0453793
KU55933	0.676	0.155862	0.309241	0.303448	-0.00841379	0.359172	0.105931	0.199034	0.366621	0.215586	0.148138	0.147862	0.144828	0.204276	0.314483	0.319448	0.0982069	0.206207	0.36331	0.204276	0.204552	0.255586	-0.00758621	0.251172	0.204276	0.311448	0.259172	0.36469	0.207586	0.207034	0.313655	0.100138	0.311724	0.52	0.469103	0.10069	0.311724	0.0968276	0.096	0.156966	0.470759	0.104276	0.476828	0.317241	0.360552	0.518345	0.312	0.19931	0.204552
KU60019	0.523034	0.105931	0.256138	0.20731	-0.00565517	0.567172	0.10731	0.20069	0.514483	0.212828	0.150621	0.153931	0.298207	0.355034	0.361103	0.159172	0.0990345	0.159448	0.405379	0.260276	0.310345	0.252552	-0.004	0.196828	0.152	0.259172	0.305655	0.37269	0.107034	0.106759	0.262483	0.150345	0.310345	0.519448	0.469931	0.156966	0.358345	0.0531034	-0.00372414	0.304	0.364138	0.105655	0.522207	0.317241	0.253655	0.520552	0.361103	0.198207	0.152552
LAPATINIB	0.24731	-0.0062069	0.625793	0.249241	0.0976552	0.094069	-0.0551724	0.0915862	0.145379	-0.00731034	0.0987586	0.144276	0.210345	0.40869	0.412	-0.00372414	-0.00234483	0.0478621	0.361655	0.26469	0.307034	0.256966	-0.00344828	0.251448	0.104828	0.311448	0.519448	0.259724	0.0431724	0.0428966	0.464966	0.0409655	0.464966	0.203172	0.253379	-0.00234483	0.197931	0.103724	0.522759	-0.0551724	0.245379	-0.0551724	0.245379	0.357241	0.142069	0.253379	0.366621	0.621655	0.0412414
LE135	0.254483	0.0536552	0.202897	0.15669	0.0951724	0.201241	0.156414	0.161103	0.10069	0.0544828	-0.0551724	-0.00648276	0.150621	0.204552	0.105931	0.108966	0.0478621	0.0536552	0.0528276	-0.00317241	0.309517	-0.0551724	-0.0551724	0.152276	0.154759	0.207586	0.145379	0.0514483	0.0542069	0.053931	0.199862	-0.00124138	0.100138	0.211448	0.104	-0.0551724	0.102621	0.0954483	0.0976552	-0.00234483	0.47269	0.0514483	0.263034	0.197103	0.0467586	0.260552	0.209517	0.0971034	-0.00151724
LINIFANIB	0.0514483	0.0547586	0.249793	0.685379	0.0971034	0.101241	0.160276	-0.00427586	0.105379	0.212552	-0.0551724	-0.00206897	-0.00455172	0.0514483	-0.00317241	0.105931	-0.00593103	0.159172	-0.00344828	-0.0062069	0.0517241	-0.00565517	-0.0551724	0.0445517	0.156966	0.0484138	0.0910345	0.0484138	0.0553103	0.0550345	0.144	0.0442759	0.143724	0.161931	-0.00565517	-0.00372414	0.102897	0.104	0.150897	-0.0551724	0.102345	0.158345	0.105103	0.0929655	-0.00344828	0.203724	0.311448	0.0442759	-0.004
LINSITINIB	0.20869	-0.00703448	0.14731	0.195448	0.262207	0.251172	0.154483	0.0937931	0.305931	0.247586	0.150897	0.314759	0.318621	0.305931	0.204552	0.044	0.103172	0.0995862	0.408138	0.578207	0.411724	0.41669	-0.0551724	0.194897	0.00124138	0.153655	0.244	0.365517	-0.00648276	-0.00648276	0.201793	-0.00675862	0.255034	0.254483	0.253931	0.201241	0.151724	0.269379	0.0481379	0.0462069	0.204552	0.100138	0.307586	0.248966	0.149517	0.310621	0.313103	0.0998621	0.255034
LOVASTATIN	0.0451034	0.0456552	0.042069	0.0470345	-0.00317241	0.160828	-0.000965517	0.0428966	0.198207	-0.00482759	0.0929655	0.0451034	0.0954483	0.16	0.0456552	-0.0551724	0.0467586	-0.00593103	0.0962759	0.0976552	0.151724	-0.00289655	-0.00731034	-0.00758621	0.0456552	0.0456552	0.146207	0.209241	0.045931	0.045931	0.0451034	0.102345	0.0990345	0.0426207	0.100414	0.0982069	0.249517	-0.0551724	-0.00675862	0.310621	0.146759	-0.00317241	0.207862	0.150345	0.253379	0.0943448	0.0448276	0.044	0.0451034
LY2183240	0.146207	0.0990345	0.0442759	0.259448	0.205379	0.304552	0.362207	-0.00675862	0.306759	0.34869	0.194069	0.252276	0.355586	0.206207	0.0442759	0.0987586	0.042069	0.213655	0.150621	0.36331	0.354483	0.250069	-0.00731034	-0.00675862	0.152828	0.0993103	0.144276	0.352276	0.100138	0.0998621	0.0453793	0.0486897	0.100138	0.246759	0.0993103	0.247862	0.197103	0.368	0.0448276	0.100414	0.14731	0.305379	0.252	0.151172	-0.00427586	0.354483	0.249241	0.0915862	0.196552
MANUMYCINA	-0.00344828	-0.00234483	-0.0551724	0.0531034	0.258345	0.0517241	0.194897	-0.0551724	0.0514483	0.236552	0.0995862	0.251172	0.256138	0.156966	0.0453793	-0.0551724	0.0484138	-0.00151724	0.0517241	0.259172	0.268	0.147034	-0.00344828	-0.0551724	0.0517241	-0.000137931	0.0506207	0.102069	-0.0017931	-0.0017931	-0.00124138	-0.0551724	0.0976552	-0.00896552	0.0528276	0.201241	0.208966	0.459448	-0.00317241	0.210069	0.0971034	0.0935172	0.153931	0.0536552	-0.000965517	0.0528276	0.0451034	0.050069	0.250621
MASITINIB	0.0957241	-0.0551724	0.101241	0.20731	0.514759	0.0415172	0.196828	0.0428966	0.102345	0.393517	-0.00262069	0.455586	0.264414	0.106759	0.0462069	-0.00648276	0.0426207	0.0462069	0.097931	0.314759	0.316138	0.249241	-0.0551724	0.0475862	0.000413793	-0.00262069	0.0453793	0.0982069	-0.0551724	-0.0551724	0.0951724	-0.00675862	0.151172	0.0957241	0.045931	0.151724	0.0475862	0.310069	-0.000689655	-0.00675862	-0.00427586	0.0957241	0.044	0.0456552	0.0434483	0.14869	0.317241	-0.00234483	0.301793
MERCK60	0.255586	0.0555862	0.14731	0.365241	0.254207	0.155586	0.370207	0.0453793	0.266345	0.625793	0.0434483	0.353655	-0.00262069	0.146207	0.197655	0.158897	0.044	0.325517	0.204276	0.102897	-0.00593103	0.19269	-0.0551724	0.141793	0.111172	0.148414	0.146759	0.20069	0.103724	0.103172	0.197103	0.0434483	0.250345	0.264138	0.148138	-0.00206897	0.157241	0.272414	0.0971034	-0.0062069	0.208138	0.269931	0.257793	0.149517	0.0984828	0.368	0.210621	0.0926897	0.245103
MG132	-0.00565517	-0.0551724	-0.0551724	-0.00151724	-0.00593103	-0.00510345	-0.0551724	0.258897	0.000689655	-0.0551724	-0.00427586	-0.00648276	-0.00124138	-0.00372414	-0.0551724	-0.0551724	0.0473103	0.053931	-0.000965517	0.0528276	-0.00482759	-0.0551724	0.161379	-0.0551724	0.000689655	-0.0062069	-0.0551724	0.0492414	-0.0551724	-0.0551724	-0.0551724	-0.0551724	-0.000965517	-0.00537931	-0.0551724	-0.00289655	-0.00317241	0.0525517	-0.0551724	-0.0551724	-0.0551724	-0.0551724	-0.0551724	-0.0551724	-0.0551724	0.0508966	0.0508966	-0.0551724	-0.0551724
MGCD265	0.367724	-0.0551724	0.511724	0.349793	0.0998621	0.151448	0.0486897	0.305655	0.261655	0.149793	0.197931	0.204552	0.151172	0.261655	0.411724	0.0473103	0.103448	-0.00565517	0.363586	0.205103	0.355862	0.465241	-0.00675862	0.29931	0.089931	0.363034	0.253379	0.361931	-0.00482759	-0.00510345	0.409793	0.0484138	0.407034	0.255862	0.417517	0.0987586	0.096	0.0475862	0.0965517	-0.0551724	0.425517	-0.0551724	0.421655	0.410897	0.255586	0.366345	0.260552	0.200414	0.250621
MK2206	-0.00289655	0.0497931	0.150069	0.369379	0.10069	0.206483	0.106759	-0.00482759	0.352552	0.0993103	0.0971034	-0.00262069	0.0987586	0.364966	-0.00372414	0.0475862	-0.0551724	0.155862	0.201793	0.147586	0.20869	-0.0062069	-0.0551724	0.0475862	0.0484138	0.0475862	0.246759	0.252828	0.050069	0.050069	0.0990345	-0.00648276	0.0990345	0.101517	0.0484138	0.0982069	0.100414	0.211724	0.0998621	0.101241	0.149241	0.106207	0.201517	0.199034	-0.004	0.20731	0.260276	0.0990345	-0.00455172
MLN2238	-0.0551724	-0.0551724	-0.0551724	-0.0551724	0.781241	-0.0551724	0.248138	-0.00317241	-0.0551724	0.626621	0.0913103	0.626069	0.255862	-0.0551724	-0.0551724	-0.0551724	-0.00289655	-0.0551724	-0.0551724	0.302621	0.0998621	0.149241	-0.00151724	-0.0551724	-0.0551724	-0.0551724	-0.0551724	0.0404138	-0.0551724	-0.0551724	-0.0551724	-0.0551724	-0.0551724	-0.0551724	-0.0551724	0.0968276	-0.0551724	0.149793	-0.0551724	-0.00344828	-0.0551724	0.190207	-0.0551724	-0.0551724	-0.0551724	-0.0551724	0.0384828	-0.0551724	0.298483
MST312	0.0451034	0.104828	-0.00455172	0.314207	-0.0551724	0.104276	0.218897	-0.0551724	0.0995862	0.163862	0.0415172	-0.0551724	-0.00758621	0.0984828	-0.00648276	0.0572414	-0.004	0.632138	0.0451034	-0.0062069	-0.00344828	-0.00482759	-0.0551724	-0.00648276	0.0561379	0.0495172	0.0434483	0.0948966	0.204552	0.204	-0.00510345	-0.0551724	0.0428966	0.107862	-0.00455172	-0.00648276	0.103172	0.164414	0.0962759	-0.00344828	0.149793	0.362207	0.154207	0.0451034	-0.0551724	0.204	0.0531034	-0.00537931	-0.00896552
NAVITOCLAX	0.784	-0.0551724	0.356138	0.0415172	-0.00648276	0.200138	-0.0551724	0.354759	0.265241	0.104276	0.094069	0.151172	0.0976552	0.0951724	0.459724	0.262483	0.0990345	-0.00317241	0.310345	0.155862	0.298759	0.255034	-0.00593103	0.24869	0.0423448	0.306483	0.204	0.313103	-0.00813793	-0.00841379	0.312	0.101241	0.357517	0.467448	0.52331	0.0503448	0.149517	-0.00262069	-0.00703448	0.209241	0.417241	-0.0551724	0.359724	0.262207	0.310345	0.516414	0.308966	0.194897	0.202897
NERATINIB	0.0896552	-0.00482759	0.405103	0.100414	0.0442759	-0.00675862	-0.0551724	0.0451034	-0.00482759	-0.0551724	0.0437241	0.089931	0.202345	0.0508966	0.248138	-0.0551724	-0.00565517	-0.0551724	-0.000689655	0.0971034	0.247862	0.0473103	-0.00648276	0.541517	0.137931	0.197379	0.257517	0.0478621	-0.00510345	-0.00510345	0.357793	-0.00813793	0.10069	0.0434483	0.0968276	-0.00537931	-0.00703448	0.0478621	0.262207	-0.0551724	0.0456552	-0.0551724	0.0888276	0.304276	-0.00841379	0.138483	0.152	0.252276	-0.0551724
NILOTINIB	-0.00344828	0.0517241	0.155862	0.213379	0.102069	0.0484138	0.0508966	-0.00731034	-0.00262069	0.0525517	-0.0551724	-0.00675862	0.0990345	0.105379	0.0484138	0.0531034	-0.0551724	0.103448	-0.00262069	-0.00510345	0.150897	-0.00565517	-0.0551724	0.0497931	0.052	0.0993103	0.0995862	-0.0551724	0.0522759	0.052	0.0506207	0.0426207	0.0484138	0.104552	-0.004	-0.0551724	0.0481379	-0.00289655	0.103172	-0.0551724	0.0973793	0.0495172	0.0982069	0.0962759	0.0893793	0.0473103	0.265793	0.0993103	-0.0551724
NINTEDANIB	0.0467586	-0.0551724	0.096	0.20869	0.0943448	0.0437241	0.0464828	-0.004	0.0437241	-0.00675862	0.0885517	-0.00482759	0.193241	0.0957241	-0.00344828	-0.0551724	0.0464828	-0.00124138	-0.004	0.0453793	0.0935172	-0.00731034	-0.0551724	0.157241	0.0962759	0.0473103	0.0935172	0.143172	-0.0551724	-0.0551724	0.152	-0.00455172	-0.00675862	0.0431724	0.0481379	-0.00565517	-0.00151724	0.0995862	-0.00731034	0.0481379	0.0451034	0.147586	0.0924138	0.152828	-0.00703448	-0.00234483	0.0412414	0.0409655	0.142345
NUTLIN3	0.574897	-0.000965517	0.310897	0.197931	-0.0551724	0.210069	0.0547586	0.252552	0.420276	0.155034	0.199862	0.100966	0.0486897	0.198759	0.416414	0.104276	0.102345	0.157241	0.413655	0.206207	0.0971034	0.360552	-0.004	0.300414	0.152552	0.313379	0.256966	0.363862	0.0492414	0.0486897	0.365241	0.0987586	0.411172	0.364966	0.51669	0.103448	0.203448	0.152828	0.0976552	-0.0551724	0.321655	0.0528276	0.416138	0.31669	0.307862	0.468552	0.205103	0.202621	0.201241
NVPBEZ235	-0.00344828	-0.00455172	0.202897	0.57269	0.313655	0.0423448	0.250069	-0.00537931	0.0462069	0.244828	-0.00565517	0.207034	0.210069	0.103448	-0.00427586	-0.00675862	-0.0551724	0.0965517	-0.00455172	0.149793	0.210621	0.197931	-0.0551724	0.0470345	0.0957241	-0.00289655	0.0448276	0.044	-0.00482759	-0.00482759	0.0965517	0.042069	0.0475862	0.0951724	-0.00675862	0.145655	-0.00427586	0.306759	0.0473103	-0.0551724	0.0423448	0.200414	0.0445517	0.0954483	-0.00455172	0.0462069	0.159448	-0.00262069	0.199586
NVPTAE684	0.46331	-0.0551724	0.156414	0.0467586	-0.0551724	0.262483	-0.0551724	0.100414	0.315034	0.0531034	0.148138	0.156414	0.350897	0.421379	0.465241	0.150897	0.053931	-0.00317241	0.522483	0.25669	0.258621	0.312276	-0.00648276	0.154483	0.0453793	0.21531	0.262483	0.315862	-0.00372414	-0.004	0.264414	-0.00234483	0.30869	0.358069	0.414207	0.102897	0.255586	-0.0551724	0.105379	0.40869	0.157793	-0.0551724	0.311724	0.306759	0.152828	0.150621	0.406483	0.26	0.102897
OBATOCLAX	0.414483	-0.0551724	0.357793	0.0495172	0.104276	0.144552	0.0954483	0.148138	0.313103	0.190207	0.240138	0.256966	0.307862	0.205931	0.416966	0.0428966	-0.00841379	0.0495172	0.417793	0.466897	0.299586	0.46	-0.00786207	0.29931	0.0486897	0.308966	0.358345	0.408138	-0.00427586	-0.00455172	0.313655	0.152828	0.469103	0.200414	0.469379	0.248414	0.149517	0.154483	0.0484138	-0.00455172	0.26	0.0442759	0.358345	0.415862	0.302897	0.312828	0.0995862	0.296828	0.299862
OLAPARIB	-0.00813793	-0.0551724	-0.0551724	0.0470345	0.67931	-0.00758621	0.298483	-0.0551724	0.00151724	0.618621	0.0464828	0.671586	0.207586	0.0965517	-0.00151724	-0.0551724	0.0456552	0.0511724	0.0533793	0.312552	0.197103	0.203724	-0.0551724	-0.00427586	0.00151724	-0.0017931	-0.00317241	0.0993103	-0.0551724	-0.0551724	-0.00206897	-0.0551724	0.0517241	0.0910345	-0.00537931	0.0957241	0.0486897	0.308414	-0.00372414	-0.00344828	-0.00455172	0.147034	-0.0017931	-0.00344828	-0.0551724	0.0492414	0.0492414	-0.00262069	0.203448
OSI027	0.412276	-0.0551724	0.25531	0.0448276	-0.00317241	0.252552	-0.0551724	0.14731	0.251448	-0.00317241	0.150069	0.0962759	0.150897	0.255034	0.302897	-0.00317241	0.30731	-0.00510345	0.361931	0.156414	0.206483	0.518897	-0.0062069	0.199862	0.0971034	0.517793	0.154759	0.363586	-0.004	-0.00427586	0.208966	-0.00537931	0.299586	0.248138	0.460828	-0.00510345	0.247586	0.0517241	0.0998621	0.0990345	0.365517	-0.0551724	0.361655	0.260276	0.100138	0.407586	0.146207	0.257793	0.096
OSI930	0.199586	0.10869	0.248414	0.522483	0.143172	0.204552	0.0553103	-0.00537931	0.107586	0.108138	-0.0062069	0.0470345	0.052	0.153379	0.0453793	0.159448	-0.00234483	0.208414	0.102621	0.103172	0.102069	0.0448276	-0.0551724	0.200414	0.267172	0.100414	0.141793	0.151724	0.157793	0.157241	0.242069	-0.00703448	0.14869	0.160828	-0.00675862	-0.00482759	0.155586	0.204828	0.0982069	-0.0551724	0.201517	0.053931	0.205379	0.243724	-0.00455172	0.208966	0.317517	0.0456552	0.042069
PAZOPANIB	0.359448	0.0533793	0.201517	0.206759	-0.00344828	0.202621	0.205103	0.206759	0.20731	0.309517	-0.00731034	0.202069	0.193517	0.198207	0.36	0.106207	0.150897	0.15531	0.201793	0.202621	0.305103	0.19931	-0.00703448	0.096	0.149793	0.25531	0.150069	0.150897	0.053931	0.0536552	0.204276	0.045931	0.207862	0.214483	0.256414	0.150069	0.258069	0.100138	0.0995862	0.0971034	0.260828	0.202345	0.307034	0.19931	0.105931	0.46	0.360276	0.144552	0.154759
PF750	0.161379	-0.0551724	0.147034	0.0514483	-0.0551724	0.147862	0.0506207	0.0522759	0.265793	0.0478621	-0.00675862	0.000965517	-0.0551724	0.147862	0.153103	0.0987586	-0.00758621	0.107862	0.263862	0.0533793	-0.004	0.0448276	-0.0551724	0.0957241	0.106759	0.0462069	0.197103	0.204	-0.0551724	-0.0551724	0.205655	0.257793	0.203172	0.205103	0.155586	-0.000689655	0.0522759	0.103724	0.0428966	-0.0551724	0.202069	0.00124138	0.155586	0.201241	0.155586	0.161103	0.0531034	0.0982069	0.0995862
PHA793887	0.574897	-0.0551724	0.411724	0.0451034	0.0998621	0.203172	0.0428966	0.306207	0.259724	0.198483	0.153103	0.304	0.305379	0.204552	0.576828	0.0495172	0.0492414	-0.00344828	0.47269	0.414759	0.402621	0.466621	-0.00537931	0.30731	-0.00565517	0.419724	0.312552	0.322207	-0.004	-0.00427586	0.373517	0.149793	0.470207	0.315862	0.523862	0.14869	0.153379	0.201517	0.102069	-0.00786207	0.42331	0.0409655	0.519724	0.421931	0.304828	0.466897	0.158069	0.30869	0.304276
PI103	0.467172	0.0467586	0.409241	0.0993103	-0.0551724	0.311448	-0.0551724	0.20069	0.40731	0.0971034	0.252	0.147586	0.29931	0.419172	0.521103	0.0445517	-0.00758621	-0.00455172	0.625517	0.359172	0.304828	0.360552	-0.0062069	0.352828	-0.00648276	0.363586	0.514483	0.424966	0.0984828	0.0982069	0.417793	0.146483	0.463862	0.257241	0.574897	0.154759	0.254207	-0.0551724	0.15531	0.155034	0.368552	-0.0551724	0.574345	0.570759	0.299034	0.40869	0.200414	0.406207	0.19931
PIFITHRINMU	0.102621	-0.00372414	0.145379	-0.0551724	0.203448	0.0489655	0.089931	-0.00289655	0.0453793	0.19931	0.0437241	0.298207	0.148966	0.094069	0.153931	0.213379	-0.0551724	-0.0551724	-0.00124138	0.150621	0.202897	0.100966	-0.00344828	-0.00703448	-0.00372414	0.0987586	0.198759	0.0489655	-0.0551724	-0.0551724	0.153931	0.0404138	0.103448	0.26331	0.100966	0.0971034	-0.004	0.0451034	0.0473103	0.158897	-0.00510345	-0.00731034	0.042069	0.204552	-0.00758621	0.0453793	0.104	0.250069	-0.00510345
PLX4720	0.149241	0.0558621	0.244552	0.208966	0.560828	0.205931	0.305103	-0.0062069	0.0495172	0.355862	0.143448	0.405103	0.562759	0.199034	0.0993103	0.111724	0.102069	0.0558621	0.0506207	0.411724	0.409793	0.251724	-0.00675862	0.044	0.156414	0.206759	0.147034	0.150069	0.0564138	0.0561379	0.147862	0.0462069	0.0984828	0.266345	0.102345	0.146759	0.156138	0.249241	0.149793	0.0517241	0.153379	0.307034	0.154759	0.192966	-0.00675862	0.149241	0.403172	0.24869	0.301793
PRIMA1	0.0484138	0.152552	-0.00731034	0.104828	-0.0551724	0.369655	0.100414	-0.00482759	0.306759	0.104276	0.0467586	-0.00262069	0.0470345	0.107862	-0.00372414	0.102345	0.101793	0.0998621	0.0993103	0.0971034	0.102345	-0.0062069	-0.0551724	-0.00703448	0.103724	-0.00317241	0.147034	0.213379	0.106207	0.105931	-0.00510345	0.045931	-0.004	0.105379	0.0489655	0.100414	0.15531	-0.0551724	-0.00510345	0.105379	0.151724	0.050069	0.259172	0.0995862	0.0473103	0.149517	0.149793	-0.00537931	-0.00455172
PRIMA1MET	0.052	0.0473103	0.0451034	0.000137931	-0.0551724	0.477655	-0.0551724	0.0445517	0.414759	0.0464828	0.149241	-0.00262069	0.150345	0.216138	0.0467586	0.044	0.201793	-0.00731034	0.255862	0.0990345	0.153655	0.096	-0.0551724	0.0428966	-0.00648276	-0.00317241	0.203448	0.318345	0.0470345	0.0470345	0.0478621	0.0423448	0.0464828	0.0470345	0.150621	0.153379	0.102345	-0.0551724	-0.0551724	0.212828	0.103172	-0.0551724	0.211724	0.205103	0.0984828	0.151724	0.0475862	0.0481379	0.0451034
PROCHLORPERAZINE	0.366069	-0.00455172	0.301793	0.151724	-0.0551724	0.258621	-0.0551724	0.198759	0.368552	0.104828	0.248414	0.150621	0.197931	0.311448	0.413931	0.101793	-0.00427586	0.0506207	0.526345	0.365241	0.300138	0.408966	-0.00675862	0.201793	0.0489655	0.260828	0.356966	0.418069	0.0462069	0.045931	0.313379	0.0442759	0.469379	0.264138	0.468828	0.153103	0.256414	-0.000413793	0.148966	0.0506207	0.415862	-0.0551724	0.468276	0.409517	0.305103	0.315034	0.158345	0.355586	0.153103
QUIZARTINIB	0.362759	0.106483	0.306207	0.311172	0.0417931	0.365517	0.0531034	0.0995862	0.369103	0.212	0.248966	0.150621	0.253103	0.36469	0.42	0.158345	0.0451034	0.16	0.474345	0.465517	0.404552	0.258345	-0.00565517	0.201517	0.160828	0.210897	0.461103	0.470483	0.158069	0.157517	0.415586	0.0448276	0.366069	0.370759	0.363862	0.154207	0.315862	0.147034	0.256414	0.102345	0.31531	0.0522759	0.473517	0.46331	0.202069	0.418069	0.517793	0.359724	0.149241
RG108	0.0984828	-0.00482759	0.0462069	-0.00537931	-0.0551724	-0.00289655	-0.00510345	0.209517	0.0462069	-0.0551724	0.000413793	-0.0551724	-0.0551724	-0.00565517	0.10069	-0.0551724	0.0517241	-0.00510345	-0.00372414	-0.0551724	0.0508966	-0.0551724	0.0406897	0.0976552	-0.00124138	0.0995862	0.0412414	-0.00565517	-0.00510345	-0.00510345	0.0943448	-0.00427586	0.094069	-0.00537931	0.0497931	0.000413793	-0.00427586	-0.00813793	-0.00593103	-0.00262069	0.258897	-0.0551724	0.0998621	0.0954483	0.0965517	0.10069	-0.0551724	-0.0551724	0.0514483
RITA	0.269655	0.158345	0.100414	0.208414	0.0486897	0.31531	0.205103	0.0990345	0.368828	0.313655	0.196276	0.156138	0.148138	0.252276	0.262759	0.161103	-0.00455172	0.157793	0.308966	0.25669	0.352276	0.250897	-0.0551724	0.146483	0.160276	0.152	0.353379	0.365793	0.159172	0.158897	0.259724	0.0464828	0.258069	0.270759	0.312276	0.153931	0.26331	0.0937931	0.14869	0.10069	0.412828	0.102345	0.473793	0.310897	0.313655	0.314483	0.212	0.199862	0.20069
RUXOLITINIB	0.461655	-0.000965517	0.365241	0.0971034	-0.0551724	0.245655	-0.00124138	0.260276	0.357241	0.149241	0.0932414	0.0987586	0.0984828	0.198759	0.418897	0.148966	0.0932414	0.101517	0.406483	0.203448	0.252276	0.197103	-0.0551724	0.249241	0.101517	0.254759	0.304276	0.303724	-0.000137931	-0.000137931	0.260828	0.150621	0.362207	0.204828	0.465517	0.0484138	0.152	-0.00151724	0.00151724	0.0462069	0.369655	-0.000689655	0.456414	0.30731	0.300414	0.467448	0.254759	0.198207	0.246759
SALERMIDE	0.407862	0.107586	0.19931	0.365241	-0.0551724	0.262483	0.215586	0.147034	0.45531	0.207862	-0.004	0.0426207	0.14731	0.304	0.30069	0.0575172	-0.0551724	0.269103	0.398759	0.256138	0.200138	0.147034	-0.0551724	0.094069	0.112	0.19931	0.195172	0.256414	0.10869	0.108414	0.0971034	0.0932414	0.255034	0.210069	0.46469	-0.004	0.205103	0.161103	0.0448276	0.100414	0.261931	0.213379	0.412276	0.254759	0.244	0.466345	0.211724	0.0423448	0.0434483
SARACATINIB	0.365241	-0.004	0.478759	0.0932414	-0.0551724	0.203448	-0.00427586	0.0492414	0.209517	0.153103	0.0982069	0.0982069	0.10069	0.309241	0.468552	0.100138	0.0984828	0.0473103	0.466897	0.20069	0.199862	0.253103	-0.0551724	0.302897	0.0481379	0.306483	0.525241	0.259724	0.0478621	0.0475862	0.420828	0.0470345	0.358621	0.207586	0.408138	-0.000689655	0.204276	-0.0551724	0.471862	0.0531034	0.306483	-0.00372414	0.408414	0.360552	0.203172	0.204276	0.255586	0.57131	0.150621
SB431542	0.0998621	0.0525517	0.105103	0.21531	0.205379	0.204276	0.205103	-0.0551724	0.0517241	0.20069	-0.0551724	0.097931	0.305379	0.206759	-0.00317241	0.053931	0.157793	0.0525517	0.0473103	0.152552	0.264966	0.0451034	-0.0551724	0.154207	0.151724	0.156414	0.0973793	0.000689655	0.0531034	0.0528276	0.14731	-0.0551724	0.0489655	0.105379	-0.00289655	0.0428966	0.152552	0.257517	0.151448	-0.000137931	0.147034	0.202069	0.150621	0.145931	-0.00482759	0.151172	0.265517	0.149517	0.0456552
SB525334	0.0442759	-0.00482759	0.0484138	0.206207	0.258897	0.305931	0.153655	-0.0551724	0.252276	0.0921379	0.0453793	0.155586	0.361931	0.305655	-0.0551724	-0.0551724	0.205379	0.0544828	0.097931	0.366069	0.412828	0.101241	-0.0551724	-0.00234483	0.0976552	0.045931	0.0935172	0.157241	-0.00427586	-0.00427586	-0.00455172	-0.0551724	0.0503448	0.0478621	0.045931	0.148414	0.101241	0.318069	-0.00262069	0.0990345	0.0412414	0.101793	0.0929655	0.0968276	0.0467586	0.104	0.209793	0.0426207	0.0995862
SELUMETINIB	0.0976552	0.106483	0.0486897	0.152552	0.567172	0.14869	0.356138	-0.0551724	0.0525517	0.404828	0.152828	0.362207	0.470207	0.0990345	-0.00289655	0.053931	0.0990345	0.0525517	-0.004	0.313379	0.313931	0.156414	-0.0551724	0.153103	0.156966	0.155586	0.0464828	0.0982069	0.106759	0.106483	0.0962759	-0.00565517	-0.0062069	0.154483	-0.00124138	0.103172	0.105931	0.208138	0.200966	0.050069	0.153379	0.30731	0.15531	0.0423448	-0.0551724	0.151448	0.300138	0.097931	0.308138
SERDEMETAN	0.51669	0.0497931	0.353931	0.0935172	-0.0551724	0.300138	-0.0551724	0.361931	0.412	0.0995862	0.196	0.097931	0.0918621	0.248138	0.466069	0.097931	0.0492414	0.0481379	0.462759	0.207586	0.305931	0.354483	-0.00675862	0.248138	0.199862	0.364414	0.251172	0.308138	0.0973793	0.0971034	0.359724	0.0495172	0.406207	0.307034	0.468552	0.0475862	0.250345	-0.00124138	0.0926897	0.0478621	0.682069	-0.0551724	0.51669	0.305931	0.253655	0.471862	0.152552	0.249241	0.199034
SGX523	0.241793	-0.0551724	0.0902069	0.0445517	0.639586	-0.0551724	0.307586	0.195172	0.0921379	0.718897	0.0462069	0.735448	0.21669	-0.0551724	0.244	-0.0551724	-0.004	-0.00455172	0.044	0.264138	0.310621	0.307862	-0.00703448	-0.00758621	-0.00731034	0.0965517	-0.00758621	0.0417931	-0.0551724	-0.0551724	0.0943448	-0.00593103	0.0951724	0.0957241	0.199034	0.153655	-0.00758621	0.211448	-0.00841379	-0.00455172	0.100138	0.152828	0.0915862	0.0462069	0.0406897	0.242621	0.0470345	-0.0062069	0.311172
SIMVASTATIN	0.102069	-0.00206897	0.0924138	-0.000137931	0.212276	0.20869	0.204552	0.0470345	0.251448	0.291586	0.14869	0.262483	0.262759	0.160828	0.0968276	0.042069	0.0401379	-0.00648276	0.200138	0.259724	0.262207	0.250897	-0.0551724	0.137379	-0.0551724	0.0431724	0.245931	0.261655	-0.00151724	-0.00151724	0.097931	0.200966	0.147862	0.144828	0.151448	0.256966	0.0528276	0.153379	-0.0551724	0.209517	0.203172	0.145931	0.313655	0.201517	0.247586	0.150897	0.0462069	0.0434483	0.350897
SIROLIMUS	0.406207	-0.00344828	0.349241	-0.00151724	-0.0551724	0.197655	-0.00593103	0.310345	0.199034	0.0448276	0.146483	0.0990345	0.150069	0.148138	0.357241	0.0423448	0.0993103	-0.00731034	0.199586	0.151172	0.264138	0.200414	-0.00565517	0.188276	0.0442759	0.30869	0.244828	0.256138	-0.00289655	-0.00289655	0.200966	0.143724	0.303172	0.147586	0.466621	0.150621	0.311172	-0.0551724	-0.0551724	0.204828	0.416138	-0.0551724	0.409517	0.305931	0.298759	0.405931	0.0445517	0.192138	0.0954483
SJ172550	0.0982069	-0.0551724	0.0428966	0.158897	0.154207	-0.00482759	0.306759	-0.00786207	0.105931	0.295724	0.0404138	0.199862	0.201517	0.0473103	0.146483	0.0965517	0.0456552	0.163034	0.0497931	0.155586	0.150069	0.194897	-0.00841379	0.0415172	0.0987586	0.0971034	0.0973793	0.145103	-0.0551724	-0.0551724	0.147862	0.000413793	0.150345	0.0915862	0.0456552	0.140138	0.0943448	0.419724	0.0926897	-0.0017931	-0.00289655	0.257517	-0.00317241	0.151448	-0.00455172	0.205655	0.045931	0.145931	0.146207
SN38	0.299862	0.107034	0.0395862	0.154207	0.152828	0.308138	0.205379	0.0888276	0.203172	0.301793	0.0431724	0.296276	0.354483	0.0525517	0.140966	0.154207	0.104	0.102345	0.0943448	0.349241	0.309517	0.243172	-0.00813793	-0.00813793	0.205655	0.104828	0.0423448	0.152276	0.108138	0.107862	0.0893793	0.0406897	0.142069	0.303172	0.201517	0.194897	0.360276	0.259448	-0.00317241	0.106483	0.202897	0.202621	0.307034	0.0946207	0.0932414	0.295724	0.29931	0.0434483	0.196828
SORAFENIB	-0.0551724	-0.0551724	0.204552	0.476276	0.0982069	-0.0551724	-0.0551724	-0.0551724	-0.0551724	-0.0551724	-0.0551724	-0.0551724	-0.00372414	0.0525517	-0.004	-0.0551724	-0.0551724	-0.0551724	-0.0551724	-0.0551724	0.104	-0.0551724	-0.0551724	-0.00317241	0.0481379	-0.00537931	0.0948966	-0.0551724	-0.0551724	-0.0551724	0.145655	0.0470345	0.0448276	0.0503448	-0.0551724	-0.0551724	-0.0551724	0.044	0.097931	-0.0551724	-0.0551724	-0.0551724	-0.0551724	0.0976552	-0.00482759	-0.0551724	0.154483	0.0965517	-0.0551724
SRT1720	-0.00372414	-0.00427586	0.153931	0.32	0.309517	0.0508966	0.0948966	-0.0551724	0.0503448	0.0891034	0.0462069	0.151724	0.313655	0.160828	-0.0551724	-0.0551724	-0.00206897	-0.000965517	0.0506207	0.262759	0.316138	0.0982069	-0.0551724	0.050069	0.154207	-0.00262069	0.0484138	0.105379	-0.00372414	-0.00372414	0.0935172	-0.0551724	0.0517241	-0.00344828	-0.00234483	0.145931	0.0503448	0.259724	-0.000689655	-0.00124138	-0.00455172	0.0428966	-0.00124138	0.0995862	-0.0551724	0.103724	0.219448	-0.00234483	0.096
SU11274	0.207586	0.0564138	0.0935172	0.0544828	0.620276	0.15531	0.309241	0.0464828	0.106759	0.784276	0.0868966	0.724966	0.253379	-0.00289655	0.144828	0.208138	0.0954483	0.108138	0.0993103	0.249793	0.0984828	0.299034	-0.00813793	0.044	0.103724	0.150621	0.0453793	0.147034	0.0569655	0.0566897	0.0971034	-0.00289655	0.0987586	0.210621	0.0973793	0.147586	0.154483	0.0998621	-0.00262069	-0.00482759	0.158069	0.253103	0.160552	0.0973793	0.0495172	0.202621	0.253931	0.0415172	0.302069
SUNITINIB	0.474621	0.107862	0.199862	0.107586	0.0921379	0.316414	0.0550345	0.097931	0.363586	0.162207	0.23931	0.0511724	0.245103	0.154207	0.255034	0.368	-0.00565517	0.107586	0.305103	0.346207	0.150345	0.0998621	-0.00648276	0.145379	0.104828	0.202345	0.299034	0.415034	0.108966	0.10869	0.205103	0.0973793	0.255034	0.36331	0.415862	0.152276	0.210069	-0.0551724	-0.00262069	0.203172	0.262207	0.152276	0.367448	0.358897	0.203724	0.413103	0.35531	0.143724	0.193793
TACEDINALINE	0.0486897	0.0544828	-0.0551724	0.264138	0.302345	0.0511724	0.369931	-0.00758621	0.101517	0.405931	0.0451034	0.196276	0.253379	-0.00289655	-0.00537931	0.0558621	0.0442759	0.272966	-0.00731034	0.252	0.0973793	0.14069	-0.0551724	-0.0551724	0.154759	-0.00151724	-0.0551724	0.151448	0.0550345	0.0547586	-0.00758621	-0.00289655	-0.0062069	0.158069	-0.00344828	0.0442759	0.0508966	0.320552	0.0484138	-0.00758621	0.0506207	0.521655	0.100966	-0.0551724	-0.00786207	0.156414	0.203172	-0.0551724	0.294345
TAMOXIFEN	-0.0551724	0.0973793	-0.0551724	0.193793	-0.0551724	0.197655	0.0492414	-0.0551724	0.141517	-0.00372414	0.0401379	-0.0551724	0.0404138	0.195724	-0.00344828	-0.00317241	-0.00537931	0.151448	0.0915862	0.0935172	0.145655	-0.0551724	-0.0551724	-0.0551724	0.104	-0.0551724	0.141793	0.197103	0.0984828	0.0984828	-0.00372414	-0.0551724	-0.00537931	0.0451034	-0.00455172	0.0431724	0.146207	0.096	0.045931	0.0968276	0.0954483	0.0495172	0.144276	0.0973793	0.0577931	0.0918621	0.0924138	0.0442759	-0.0551724
TANDUTINIB	0.420828	-0.0551724	0.465793	0.0423448	-0.0551724	0.151448	-0.00372414	0.100966	0.259448	0.0495172	0.150897	0.0489655	0.150069	0.35531	0.535724	0.150621	-0.00372414	0.0456552	0.531034	0.19931	0.101517	0.209793	-0.00648276	0.36	-0.00675862	0.369655	0.576552	0.260552	-0.004	-0.00427586	0.64069	0.10069	0.413103	0.306759	0.418345	0.0971034	0.196276	0.0453793	0.410621	-0.00565517	0.314759	-0.004	0.265241	0.580414	0.205655	0.259448	0.146759	0.576552	0.152276
TEMSIROLIMUS	0.307586	0.103172	0.147034	0.151172	-0.0551724	0.353931	0.0495172	0.200138	0.35531	0.201241	0.147586	0.0473103	0.0954483	0.104552	0.150069	0.150069	0.0973793	0.100138	0.250345	0.100414	0.153655	0.140966	-0.0551724	0.141793	0.0990345	0.148966	0.198483	0.209241	0.104276	0.104	0.149241	0.0484138	0.145103	0.255862	0.308414	0.157517	0.315586	0.044	-0.00482759	0.209793	0.356966	0.0481379	0.509241	0.153379	0.251172	0.356966	0.151724	0.0907586	0.145379
TENIPOSIDE	0.302621	-0.0551724	0.0946207	-0.00758621	0.0481379	0.0462069	-0.0062069	0.150345	0.0993103	0.144552	0.0951724	0.29931	0.150897	0.0506207	0.355034	-0.00510345	0.197931	-0.0062069	0.147586	0.253103	0.305379	0.552276	-0.00427586	0.0442759	0.0478621	0.306759	0.0932414	0.152828	-0.0551724	-0.0551724	0.148966	0.0426207	0.256414	0.203724	0.403724	0.0982069	0.316138	-0.00648276	-0.00427586	0.263862	0.153655	-0.0551724	0.197931	0.148966	0.143724	0.148138	0.150345	0.14869	0.144828
TG100115	0.0982069	0.105655	0.199034	0.421379	0.0968276	0.205379	0.16	-0.00427586	0.199034	0.212	0.149517	0.0511724	0.101241	0.415862	0.147586	0.156414	0.105655	0.15531	0.307862	0.0971034	0.157517	0.151448	-0.0551724	0.147034	0.0542069	0.259448	0.247034	0.200966	0.15531	0.154759	0.19931	-0.00593103	0.198483	0.210621	0.0971034	0.101517	0.257241	0.105379	0.297103	0.0525517	0.351724	0.158621	0.312552	0.24731	-0.00344828	0.253655	0.315862	0.201241	0.0976552
TG101348	0.20869	0.151172	0.308138	0.198759	-0.0551724	0.365793	0.0497931	0.0514483	0.359448	0.154483	0.143172	0.0553103	0.152	0.318069	0.261655	0.306207	0.103172	0.149517	0.423862	0.0971034	0.0995862	0.152552	-0.0551724	0.250345	0.104276	0.206759	0.459724	0.259172	0.20069	0.200138	0.364138	0.0492414	0.148414	0.262483	0.15669	0.152	0.258621	-0.0551724	0.300138	0.152276	0.412	0.0484138	0.41531	0.361655	0.209241	0.259172	0.26	0.258897	0.202345
TGX221	0.0888276	-0.0017931	0.205103	0.210069	0.264414	0.104552	0.101793	-0.00758621	0.104276	0.096	0.246483	0.259172	0.568552	0.421931	0.199034	-0.0551724	0.0998621	-0.00151724	0.259724	0.372414	0.476552	0.312828	0.0393103	0.148966	0.0965517	0.204552	0.256414	0.306207	0.0464828	0.0462069	0.201793	-0.0551724	0.202069	0.0946207	0.100414	0.25531	0.150345	0.361103	0.152276	0.101517	0.097931	0.0478621	0.153931	0.253103	-0.0551724	0.150069	0.366621	0.250621	0.150621
TIPIFARNIBP2	-0.0551724	-0.0551724	-0.0551724	-0.000689655	0.680966	0.0456552	0.20731	-0.0551724	0.103448	0.563586	0.0929655	0.578759	0.210069	0.0475862	-0.0551724	-0.0551724	0.0453793	-0.000413793	-0.000137931	0.319172	0.156966	0.160828	-0.00786207	-0.0551724	0.00151724	-0.0551724	-0.00537931	0.142345	-0.0551724	-0.0551724	-0.0551724	-0.0551724	-0.000137931	-0.0551724	-0.00565517	0.154483	-0.00234483	0.260276	-0.0551724	0.042069	-0.0551724	0.0965517	-0.00648276	-0.00510345	-0.0551724	0.0531034	0.0464828	-0.00731034	0.202621
TIVANTINIB	0.465517	-0.00317241	0.35669	0.145655	-0.00841379	0.412	-0.0551724	0.363862	0.510345	0.0993103	0.247034	0.194069	0.294345	0.357517	0.466621	0.045931	0.0445517	0.0431724	0.559724	0.405931	0.510345	0.356414	-0.00537931	0.247586	0.045931	0.313931	0.402621	0.515862	0.0456552	0.0453793	0.311172	0.096	0.405655	0.305379	0.473793	0.151172	0.247034	0.045931	0.0453793	0.202345	0.534621	-0.0551724	0.569931	0.41531	0.302897	0.518897	0.249793	0.249517	0.19931
TIVOZANIB	0.306483	-0.0017931	0.504552	0.522759	0.0470345	0.148414	-0.00234483	0.0943448	0.199862	0.100414	0.149793	0.0470345	0.0428966	0.304	0.358345	0.149241	-0.00510345	0.0462069	0.363586	0.0990345	0.101517	0.20731	-0.00648276	0.295172	0.151172	0.360276	0.353655	0.204828	0.050069	0.0495172	0.460276	0.141517	0.305103	0.356138	0.250345	0.0453793	0.196	-0.00372414	0.24731	-0.0551724	0.355034	-0.004	0.309793	0.455586	0.096	0.251724	0.200138	0.353655	0.145379
TOPOTECAN	0.0508966	-0.00234483	0.0924138	0.0525517	0.161931	0.260828	0.149517	-0.00289655	0.310345	0.245103	0.145379	0.262483	0.312	0.154759	0.144276	0.0434483	0.0464828	0.0478621	0.202069	0.364414	0.308966	0.301793	-0.0551724	0.0423448	-0.000137931	0.044	0.242345	0.25669	-0.0017931	-0.0017931	0.0467586	0.0428966	0.198759	0.0946207	0.151172	0.256138	0.208966	0.317241	-0.0551724	0.155034	0.101517	0.0976552	0.302621	0.198759	0.145655	0.154483	0.147862	0.0902069	0.253655
TPCA1	0.101793	-0.00427586	0.045931	0.102069	0.565241	0.0965517	0.355862	-0.00151724	0.153655	0.767724	-0.00648276	0.618345	0.102345	-0.00317241	0.0481379	0.0965517	0.0437241	0.15669	0.0497931	0.146207	0.045931	0.195724	-0.0551724	0.0442759	-0.00427586	0.0437241	0.0456552	0.0995862	-0.00427586	-0.00455172	0.0486897	-0.00317241	0.0478621	0.150345	0.0470345	0.0965517	0.0489655	0.209517	0.0417931	-0.00482759	0.100138	0.252552	0.101517	0.0475862	0.0497931	0.153103	0.0484138	-0.00593103	0.252
TRAMETINIB	0.298483	-0.00344828	0.254483	0.211172	0.097931	0.20731	-0.0551724	0.150069	0.310069	0.0473103	0.147862	0.103448	0.204	0.317241	0.349241	0.0448276	0.100966	0.0475862	0.406483	0.306483	0.414207	0.26	-0.00427586	0.261379	0.0506207	0.259172	0.250897	0.411724	-0.00289655	-0.00289655	0.255586	-0.00510345	0.309793	0.152	0.405931	0.100414	0.204	0.0503448	0.156138	0.0517241	0.255586	-0.0551724	0.258345	0.410345	0.147586	0.354483	0.366345	0.151724	0.045931
TRETINOIN	-0.0551724	0.255862	-0.0551724	-0.00427586	-0.0551724	0.0464828	0.153103	-0.0551724	-0.00786207	-0.0551724	-0.0062069	-0.0551724	-0.00731034	-0.00317241	-0.0551724	-0.0551724	-0.0551724	0.0423448	-0.00593103	-0.00593103	-0.00317241	-0.0551724	-0.0551724	-0.0551724	-0.00648276	-0.0551724	-0.00675862	-0.00317241	0.255586	0.255862	-0.0551724	-0.00731034	-0.0551724	-0.0551724	-0.00427586	-0.0062069	-0.00372414	-0.0551724	-0.0551724	-0.00317241	0.0404138	-0.0551724	0.0456552	-0.00482759	-0.0551724	-0.00648276	-0.0551724	-0.0551724	-0.0551724
TRIFLUOPERAZINE	0.307586	-0.00289655	0.149793	0.152	-0.0551724	0.311724	-0.0551724	0.150345	0.412828	0.102621	0.246207	0.102621	0.240966	0.411448	0.360828	0.0470345	-0.00648276	0.0495172	0.569103	0.365793	0.303724	0.305655	-0.00703448	0.149793	0.0475862	0.208138	0.305103	0.415862	0.0473103	0.0470345	0.259724	-0.00234483	0.414207	0.210069	0.363586	0.151172	0.304	-0.00151724	0.097931	0.200414	0.310069	-0.0551724	0.414483	0.360828	0.202897	0.259448	0.208966	0.249241	0.149793
TUBASTATINA	0.420828	0.101517	0.302897	0.0467586	-0.0551724	0.201517	-0.0551724	0.364966	0.366069	0.102345	0.144	0.148414	0.0442759	0.044	0.414759	0.0484138	0.0481379	0.0481379	0.310345	0.255862	0.299862	0.353103	-0.00703448	0.196828	0.148138	0.306207	0.197103	0.304	0.0998621	0.0998621	0.258621	0.149517	0.406483	0.256966	0.516414	0.0484138	0.193793	-0.00206897	-0.0062069	-0.00537931	0.531586	-0.0551724	0.462759	0.304552	0.303448	0.571862	0.154207	0.143448	0.154207
TW37	0.264414	-0.00344828	0.252828	0.305931	-0.0551724	0.314759	0.0508966	0.101517	0.418621	0.156414	0.251172	0.104	0.194069	0.560276	0.370207	0.0489655	-0.00455172	0.102345	0.524414	0.318345	0.308966	0.263034	-0.00537931	0.202345	0.0968276	0.260828	0.410897	0.419448	0.0475862	0.0473103	0.414759	0.0467586	0.369655	0.261655	0.31531	0.153379	0.30731	0.204	0.149517	0.202069	0.261103	0.0506207	0.41669	0.467448	0.104828	0.314207	0.209793	0.355034	0.152552
UNC0321	0.415034	-0.0551724	0.315034	0.145379	-0.0551724	0.200138	-0.00206897	0.0998621	0.361379	0.0984828	0.102621	0.102345	0.198207	0.51669	0.473793	0.102345	0.151448	0.100414	0.792	0.206207	0.0984828	0.26	-0.0551724	0.308966	0.0473103	0.369379	0.371034	0.258897	-0.00289655	-0.00317241	0.428	0.0993103	0.463034	0.311448	0.411172	-0.0017931	0.253931	0.0511724	0.212	0.0462069	0.36469	-0.00234483	0.363862	0.417517	0.250069	0.312828	0.20731	0.369655	0.200414
VELIPARIB	0.313379	-0.00372414	0.249241	0.249517	0.141517	0.25669	-0.00206897	0.148138	0.314759	0.0995862	0.198207	0.149517	0.300138	0.305379	0.261655	0.0481379	0.207034	0.102897	0.316138	0.366897	0.358897	0.257793	-0.0062069	0.19931	0.148414	0.258621	0.252552	0.472966	-0.00317241	-0.00317241	0.308414	0.0475862	0.359724	0.357517	0.412	0.100414	0.259172	0.15669	0.0481379	0.0525517	0.259724	0.0464828	0.313655	0.361103	0.149793	0.416966	0.359448	0.199586	0.197655
VER155008	-0.00289655	-0.0551724	-0.00344828	-0.004	-0.0551724	-0.0551724	-0.0551724	-0.00372414	-0.0017931	-0.0551724	0.156138	-0.00317241	-0.00262069	-0.0062069	0.0453793	-0.0551724	0.0542069	-0.00372414	-0.00344828	0.101517	-0.00151724	0.000137931	-0.00427586	-0.0551724	0.0987586	0.000413793	-0.0551724	0.0462069	-0.0551724	-0.0551724	-0.00289655	-0.0551724	0.0993103	0.0442759	0.0514483	0.104	0.0921379	-0.00289655	-0.0551724	-0.00427586	-0.0551724	-0.00124138	-0.0551724	-0.00124138	-0.000137931	0.0484138	0.150345	-0.00344828	0.103724
VORINOSTAT	0.0464828	0.0489655	-0.00841379	0.0971034	0.26	0.0937931	0.305103	-0.00593103	0.0473103	0.296	0.0984828	0.207862	0.261931	-0.00482759	-0.00482759	0.0984828	-0.00427586	0.150897	-0.00510345	0.256966	0.102345	0.19931	-0.0551724	-0.00813793	0.0492414	-0.004	-0.00868966	0.150069	0.0495172	0.0492414	-0.0062069	0.371862	-0.00510345	0.150621	-0.00731034	0.14869	0.0954483	0.205931	-0.00593103	-0.0551724	0.0948966	0.404	0.0976552	-0.00841379	-0.00510345	0.0929655	0.193793	-0.0551724	0.298759
WZ4002	0.468	0.102621	0.313379	0.0995862	-0.0551724	0.459724	-0.0551724	0.151172	0.616414	0.0486897	0.307862	0.0489655	0.297655	0.460552	0.366069	0.0462069	0.0976552	0.0431724	0.619172	0.301793	0.252828	0.312828	-0.00482759	0.302621	0.14731	0.366897	0.410345	0.565793	0.153379	0.153103	0.318345	0.0984828	0.412828	0.205103	0.571586	0.150897	0.300966	-0.004	0.0489655	0.253379	0.421379	-0.0551724	0.522207	0.522483	0.256138	0.471862	0.144276	0.302897	0.151448
ZEBULARINE	0.403448	0.0506207	0.194069	0.0937931	-0.0551724	0.0973793	-0.00262069	0.142621	0.307586	0.14869	0.422207	0.0957241	-0.00565517	0.103448	0.304	0.200414	-0.00703448	0.0470345	0.360828	0.151448	0.096	0.251172	-0.00731034	0.193517	0.0968276	0.360552	0.198207	0.255034	0.0993103	0.0987586	0.302897	0.044	0.346483	0.405655	0.302345	0.373517	0.200414	-0.0551724	0.148966	0.0481379	0.35531	-0.00427586	0.40869	0.252276	0.197379	0.301793	0.248966	0.202345	0.470483
ZSTK474	0.297655	-0.00206897	0.146207	0.104276	0.0976552	0.460552	-0.00427586	0.146483	0.463586	0.142069	0.250345	0.19131	0.347862	0.310069	0.146759	-0.00703448	0.203172	-0.000413793	0.352552	0.409241	0.408414	0.251172	-0.00841379	0.0428966	0.096	0.149241	0.149793	0.413379	-0.00151724	-0.00151724	0.0937931	-0.00648276	0.151172	0.144	0.359172	0.204276	0.200966	0.102897	-0.0551724	0.257241	0.205379	-0.00151724	0.357517	0.200966	0.097931	0.410069	0.202897	0.14069	0.146483
[truncated: 92 more columns]

## Sheet: F.DrugERank_NCI60
	ABIRATERONE	ACETYLCYSTEINE	AFATINIB	AMONAFIDE	AMSACRINE	AXITINIB	AZACITIDINE	BOSUTINIB	CAMPTOTHECIN	CELECOXIB	CLADRIBINE	CLOFARABINE	CLOTRIMAZOLE	COLCHICINE	DABRAFENIB	DASATINIB	DAUNORUBICIN	DECITABINE	DEXAMETHASONE	DIGOXIN	DOCETAXEL	DOXORUBICIN	EPIRUBICIN	ERLOTINIB	ETACRYNICACID	ETHINYLESTRADIOL	ETOPOSIDE	EVEROLIMUS	FLOXURIDINE	FLUCONAZOLE	FLUDARABINE	FLUMETHASONE	FLUOROMETHOLONE	FLUOROURACIL	FLUPHENAZINE	FLUVASTATIN	FULVESTRANT	GEFITINIB	GEMCITABINE	HALOPERIDOL	HOMOHARRINGTONINE	IDARUBICIN	IMATINIB	IRINOTECAN	ITRACONAZOLE	LAPATINIB	LOVASTATIN	MEBENDAZOLE	METHOTREXATE
ABIRATERONE	0	-0.057554	0.0392806	0.038705	-0.00489209	0.041295	-0.00978417	0.0879137	-0.00489209	0.0444604	-0.0100719	-0.00805755	0.0482014	0.19741	0.0907914	0.0404317	0.103165	-0.00661871	0.0976978	0.0467626	-0.00661871	0.0971223	0.148489	-0.00604317	0.0976978	0.254532	0.0473381	-0.057554	0.0461871	0.0484892	0.037554	0.15741	0.211799	-0.057554	0.0956835	0.100288	0.316978	-0.00920863	0.0398561	0.0971223	-0.00805755	0.101439	-0.00604317	0.0458993	0.0997122	0.0484892	0.209496	-0.00489209	-0.057554
ACETYLCYSTEINE	-0.057554	0	0.0899281	-0.057554	-0.057554	-0.057554	-0.0106475	-0.0094964	-0.057554	-0.057554	-0.00892086	-0.057554	0.0415827	-0.057554	-0.00863309	0.0441727	-0.00920863	-0.00920863	0.0381295	-0.057554	-0.057554	-0.0109353	-0.0106475	-0.0057554	-0.00978417	-0.00978417	-0.057554	0.0398561	-0.057554	-0.057554	-0.0100719	0.0369784	-0.0103597	-0.057554	-0.00863309	-0.0109353	-0.0115108	0.0893525	-0.057554	0.052518	-0.057554	-0.00863309	-0.0115108	-0.057554	-0.00690647	0.0939568	-0.00978417	-0.057554	-0.057554
AFATINIB	0.0392806	0.0899281	0	-0.00978417	0.0464748	0.0430216	0.0933813	0.352806	-0.057554	0.0415827	0.0933813	0.041295	0.0444604	0.146763	0.193094	0.355108	-0.00748201	0.0418705	0.141295	0.0444604	-0.057554	0.0407194	-0.00892086	0.426475	0.0427338	0.143885	-0.057554	0.195396	-0.00776978	-0.00633094	0.138705	0.0392806	0.092518	-0.057554	0.196259	0.300576	0.193957	0.623309	0.142446	0.145899	-0.057554	-0.00690647	0.148489	0.0435971	0.301439	0.624748	0.0395683	0.0994245	-0.057554
AMONAFIDE	0.038705	-0.057554	-0.00978417	0	-0.057554	0.55482	0.100288	-0.0094964	0.151079	0.10259	-0.057554	-0.00805755	0.245899	0.0398561	0.0461871	-0.00863309	-0.00374101	0.149353	0.24705	0.0948201	-0.057554	-0.00604317	-0.00374101	-0.00604317	-0.00892086	-0.00690647	-0.057554	-0.057554	0.154245	0.191942	-0.00978417	-0.057554	-0.00748201	0.420432	-0.00489209	-0.00604317	-0.00633094	-0.057554	0.303165	-0.00546763	-0.057554	-0.00402878	-0.057554	0.0435971	-0.057554	-0.057554	-0.057554	-0.00316547	0.201151
AMSACRINE	-0.00489209	-0.057554	0.0464748	-0.057554	0	-0.00172662	-0.00776978	-0.00690647	0.0988489	-0.00201439	-0.057554	-0.0100719	-0.00230216	0.147338	0.15223	-0.00633094	0.0988489	-0.057554	-0.057554	0.0507914	-0.00546763	0.149928	0.0994245	0.244748	0.0982734	0.0384173	-0.00345324	-0.00460432	0.0479137	0.102878	-0.057554	-0.057554	-0.00489209	-0.00460432	0.142446	0.144748	-0.057554	0.149928	-0.0094964	0.100863	-0.0057554	0.0516547	0.0922302	-0.057554	0.102878	0.148489	-0.057554	0.201727	-0.00201439
AXITINIB	0.041295	-0.057554	0.0430216	0.55482	-0.00172662	0	0.0404317	0.041295	0.237266	0.265755	0.041295	0.0467626	0.355108	0.0464748	0.211799	0.0971223	0.105468	0.143597	0.241295	0.242734	-0.00892086	0.104604	0.106043	0.0470504	0.151942	0.0456115	-0.00892086	-0.057554	0.0991367	0.136978	0.041295	-0.057554	0.149353	0.304317	0.100288	0.206906	0.0953957	-0.00863309	0.340719	0.203741	-0.057554	0.105468	-0.057554	0.0444604	-0.00719424	-0.00978417	-0.00719424	0.108633	0.300576
AZACITIDINE	-0.00978417	-0.0106475	0.0933813	0.100288	-0.00776978	0.0404317	0	0.0919424	0.045036	-0.00863309	0.306906	0.259712	0.0899281	0.0433094	0.0916547	0.145036	-0.00805755	0.581871	0.234676	0.14446	0.0410072	0.0928058	-0.057554	0.0438849	0.0401439	0.146187	0.0453237	0.144173	0.267194	0.195108	0.304317	0.0392806	0.0441727	0.203165	0.245036	0.252518	-0.00690647	0.192518	0.512374	0.0910791	0.0939568	-0.00690647	0.0910791	-0.00834532	0.245324	0.0965468	0.0905036	0.0418705	0.1
BOSUTINIB	0.0879137	-0.0094964	0.352806	-0.0094964	-0.00690647	0.041295	0.0919424	0	-0.057554	0.0421583	0.0902158	0.0395683	-0.057554	0.140719	0.142734	0.241583	0.0398561	0.0404317	0.0415827	0.0421583	-0.057554	0.0444604	-0.057554	0.303453	0.041295	0.0907914	-0.057554	0.0410072	0.0415827	0.0464748	0.136691	-0.00776978	0.0418705	-0.057554	0.147338	0.248201	0.188201	0.300863	0.137842	0.0928058	-0.00892086	0.0421583	0.200863	0.0433094	0.246475	0.249353	-0.0100719	0.0959712	-0.00920863
CAMPTOTHECIN	-0.00489209	-0.057554	-0.057554	0.151079	0.0988489	0.237266	0.045036	-0.057554	0	0.0930935	-0.011223	0.042446	0.100863	0.0470504	0.096259	0.0994245	0.0965468	0.147626	0.250504	0.0441727	0.196259	0.208345	0.0974101	-0.00920863	0.0933813	0.048777	0.101727	0.153669	0.14705	0.254245	-0.057554	-0.0057554	0.0913669	0.198561	0.10259	0.245612	0.0404317	-0.00863309	0.194532	0.246763	0.104029	0.0971223	0.0473381	0.261439	0.0968345	0.0435971	0.101439	0.15223	0.451942
CELECOXIB	0.0444604	-0.057554	0.0415827	0.10259	-0.00201439	0.265755	-0.00863309	0.0421583	0.0930935	0	0.0401439	0.0458993	-0.00776978	-0.00431655	0.371223	0.145324	0.304317	-0.00345324	-0.00230216	-0.00892086	0.0401439	0.152518	0.26	0.0953957	0.155971	-0.00374101	0.153957	-0.00633094	0.201151	0.0421583	0.0882014	-0.057554	0.148777	0.209496	0.204892	0.303741	0.0458993	-0.00719424	0.0461871	0.151655	0.0415827	0.204892	-0.0094964	0.045036	0.041295	0.0404317	-0.00633094	0.156259	0.201727
CLADRIBINE	-0.0100719	-0.00892086	0.0933813	-0.057554	-0.057554	0.041295	0.306906	0.0902158	-0.011223	0.0401439	0	0.789353	0.0933813	-0.00633094	0.191367	0.143885	0.0421583	0.203165	0.088777	0.0421583	-0.0103597	0.0893525	-0.00604317	-0.00690647	0.0910791	0.0430216	-0.057554	0.0389928	0.205755	0.0415827	0.744317	-0.00776978	0.0389928	0.101439	0.0942446	0.146475	-0.00719424	0.140719	0.20259	0.0902158	-0.0094964	0.0430216	-0.00805755	-0.0057554	0.195108	0.146187	-0.00834532	0.0438849	0.0401439
CLOFARABINE	-0.00805755	-0.057554	0.041295	-0.00805755	-0.0100719	0.0467626	0.259712	0.0395683	0.042446	0.0458993	0.789353	0	0.0933813	-0.00633094	0.0956835	0.092518	0.0415827	0.205468	0.0991367	-0.057554	0.0410072	0.145324	0.0421583	-0.00920863	-0.00661871	0.195683	-0.00460432	0.0421583	0.208058	0.0899281	0.639424	-0.00892086	0.139856	0.101727	0.0965468	0.249353	-0.00517986	0.0384173	0.155683	0.141583	-0.00546763	-0.0057554	0.038705	0.0942446	0.0879137	0.0873381	-0.00661871	0.0433094	-0.00661871
CLOTRIMAZOLE	0.0482014	0.0415827	0.0444604	0.245899	-0.00230216	0.355108	0.0899281	-0.057554	0.100863	-0.00776978	0.0933813	0.0933813	0	-0.057554	0.0435971	0.101727	-0.00431655	0.0953957	0.150791	0.143309	0.193094	0.142446	-0.0057554	-0.057554	0.0444604	0.102302	0.198561	0.200288	0.0499281	0.204604	0.0395683	0.0910791	0.0913669	-0.057554	0.202302	0.201439	-0.00661871	0.0945324	-0.057554	0.150216	0.202302	-0.00374101	0.096259	0.0461871	0.356547	0.158273	0.148777	-0.00230216	-0.057554
COLCHICINE	0.19741	-0.057554	0.146763	0.0398561	0.147338	0.0464748	0.0433094	0.140719	0.0470504	-0.00431655	-0.00633094	-0.00633094	-0.057554	0	0.151942	0.0991367	0.205468	0.0418705	0.0953957	0.103165	0.106619	0.208921	0.208345	0.188201	0.196547	0.150504	0.105755	0.104892	0.0922302	0.101151	0.0433094	0.0922302	0.0473381	-0.057554	0.0988489	0.202878	0.202302	0.253381	0.0930935	0.259424	0.259424	0.148489	-0.00892086	0.255396	0.197986	0.0936691	0.148201	0.245324	-0.00834532
DABRAFENIB	0.0907914	-0.00863309	0.193094	0.0461871	0.15223	0.211799	0.0916547	0.142734	0.096259	0.371223	0.191367	0.0956835	0.0435971	0.151942	0	0.256547	0.154532	0.0473381	0.148489	0.0991367	0.0415827	0.254245	0.104604	0.200863	0.204892	0.0461871	0.150504	0.0910791	0.147626	0.0997122	0.191079	0.0470504	0.20777	0.103453	0.257698	0.315827	0.198561	0.150791	0.146763	0.309209	0.0421583	0.106619	-0.00633094	0.149353	0.308921	0.201151	0.0401439	0.204604	0.154245
DASATINIB	0.0404317	0.0441727	0.355108	-0.00863309	-0.00633094	0.0971223	0.145036	0.241583	0.0994245	0.145324	0.143885	0.092518	0.101727	0.0991367	0.256547	0	0.0974101	0.0979856	0.203741	0.0956835	0.0988489	0.203741	0.0476259	-0.00748201	0.0982734	0.201439	0.0516547	0.313237	0.042446	0.0479137	0.193957	0.096259	0.197122	-0.057554	0.36259	0.46259	0.406619	0.245899	0.148777	0.260576	0.0965468	0.0991367	0.092518	0.143885	0.307194	0.251367	0.0982734	0.0441727	0.0366906
DAUNORUBICIN	0.103165	-0.00920863	-0.00748201	-0.00374101	0.0988489	0.105468	-0.00805755	0.0398561	0.0965468	0.304317	0.0421583	0.0415827	-0.00431655	0.205468	0.154532	0.0974101	0	-0.0109353	0.0479137	0.14964	0.204604	0.573813	0.843453	0.187914	0.154532	0.197122	0.257698	0.200288	0.148489	0.0922302	-0.00920863	0.196547	0.255396	0.104892	0.0415827	0.25223	0.204604	0.19482	-0.057554	0.045036	0.148201	0.737698	0.0861871	0.0473381	0.0418705	0.140719	0.196835	0.256259	0.205755
DECITABINE	-0.00661871	-0.00920863	0.0418705	0.149353	-0.057554	0.143597	0.581871	0.0404317	0.147626	-0.00345324	0.203165	0.205468	0.0953957	0.0418705	0.0473381	0.0979856	-0.0109353	0	0.250216	0.0461871	0.0441727	0.0971223	-0.057554	-0.0115108	0.0395683	0.0476259	0.0484892	0.149928	0.469209	0.196547	0.201439	0.088777	0.0982734	0.200576	0.150791	0.101151	-0.00374101	0.0930935	0.531655	0.0971223	0.0490647	-0.00978417	-0.00834532	0.045036	0.141295	-0.00460432	0.0959712	-0.057554	0.151655
DEXAMETHASONE	0.0976978	0.0381295	0.141295	0.24705	-0.057554	0.241295	0.234676	0.0415827	0.250504	-0.00230216	0.088777	0.0991367	0.150791	0.0953957	0.148489	0.203741	0.0479137	0.250216	0	0.0974101	0.0988489	0.101151	0.0444604	-0.00748201	0.0876259	0.206043	0.0548201	0.148489	0.0968345	0.347338	0.0893525	0.523022	0.476978	0.190216	0.152806	0.206619	0.202014	0.140719	0.344748	0.153381	-0.00201439	0.100576	0.0430216	0.0490647	0.249928	0.0444604	0.149065	-0.057554	0.143597
DIGOXIN	0.0467626	-0.057554	0.0444604	0.0948201	0.0507914	0.242734	0.14446	0.0421583	0.0441727	-0.00892086	0.0421583	-0.057554	0.143309	0.103165	0.0991367	0.0956835	0.14964	0.0461871	0.0974101	0	0.148489	0.150504	0.0994245	0.045036	0.0505036	-0.00661871	0.311511	0.0939568	-0.057554	0.102878	0.0418705	-0.00115108	-0.00115108	-0.057554	0.0948201	0.148489	0.0496403	0.200576	0.0953957	0.0994245	0.096259	0.152518	-0.00748201	-0.057554	0.150504	0.0453237	0.155683	0.0461871	0.0433094
DOCETAXEL	-0.00661871	-0.057554	-0.057554	-0.057554	-0.00546763	-0.00892086	0.0410072	-0.057554	0.196259	0.0401439	-0.0103597	0.0410072	0.193094	0.106619	0.0415827	0.0988489	0.204604	0.0441727	0.0988489	0.148489	0	0.314388	0.203453	-0.057554	-0.00920863	0.101727	0.461151	0.514388	-0.0094964	0.0456115	-0.0100719	0.0438849	0.0922302	-0.057554	0.146763	0.242158	0.149065	0.041295	-0.00920863	0.140719	0.357122	0.152806	-0.00776978	0.307482	0.136403	-0.0106475	0.351942	0.0936691	-0.057554
DOXORUBICIN	0.0971223	-0.0109353	0.0407194	-0.00604317	0.149928	0.104604	0.0928058	0.0444604	0.208345	0.152518	0.0893525	0.145324	0.142446	0.208921	0.254245	0.203741	0.573813	0.0971223	0.101151	0.150504	0.314388	0	0.525612	0.141583	0.249353	0.205755	0.357986	0.358849	0.0976978	0.151079	0.0902158	0.0916547	0.247626	0.0470504	0.255683	0.313813	0.153957	0.144748	-0.00374101	0.197986	0.25223	0.424173	0.142734	0.256259	0.149065	0.195683	0.247338	0.304317	0.0976978
EPIRUBICIN	0.148489	-0.0106475	-0.00892086	-0.00374101	0.0994245	0.106043	-0.057554	-0.057554	0.0974101	0.26	-0.00604317	0.0421583	-0.0057554	0.208345	0.104604	0.0476259	0.843453	-0.057554	0.0444604	0.0994245	0.203453	0.525612	0	0.092518	0.106331	0.145899	0.255683	0.200288	0.100288	-0.0094964	-0.057554	0.0939568	0.201439	0.105468	-0.00978417	0.200288	0.150216	0.0913669	-0.057554	0.0456115	0.100863	0.581295	0.0364029	0.0476259	-0.057554	0.0899281	0.143597	0.207194	0.158849
ERLOTINIB	-0.00604317	-0.0057554	0.426475	-0.00604317	0.244748	0.0470504	0.0438849	0.303453	-0.00920863	0.0953957	-0.00690647	-0.00920863	-0.057554	0.188201	0.200863	-0.00748201	0.187914	-0.0115108	-0.00748201	0.045036	-0.057554	0.141583	0.092518	0	0.141583	0.0907914	-0.057554	-0.057554	0.0884892	0.200863	-0.00719424	0.0905036	0.0418705	0.0435971	0.145612	0.147338	-0.0057554	0.629928	-0.0094964	0.0398561	-0.00834532	0.145036	0.244748	-0.00719424	0.196259	0.521583	-0.00920863	0.24705	0.0435971
ETACRYNICACID	0.0976978	-0.00978417	0.0427338	-0.00892086	0.0982734	0.151942	0.0401439	0.041295	0.0933813	0.155971	0.0910791	-0.00661871	0.0444604	0.196547	0.204892	0.0982734	0.154532	0.0395683	0.0876259	0.0505036	-0.00920863	0.249353	0.106331	0.141583	0	0.0496403	-0.00316547	-0.00805755	0.143597	0.0994245	0.0404317	0.143597	0.148777	0.0496403	0.146187	0.15223	0.0988489	0.146187	0.0401439	0.198849	-0.057554	0.152518	-0.00690647	0.0389928	0.195971	0.146763	0.0435971	0.104029	0.0516547
ETHINYLESTRADIOL	0.254532	-0.00978417	0.143885	-0.00690647	0.0384173	0.0456115	0.146187	0.0907914	0.048777	-0.00374101	0.0430216	0.195683	0.102302	0.150504	0.0461871	0.201439	0.197122	0.0476259	0.206043	-0.00661871	0.101727	0.205755	0.145899	0.0907914	0.0496403	0	-0.00230216	0.0988489	0.0470504	0.0447482	0.0418705	0.198849	0.257122	-0.057554	0.199424	0.356835	0.312374	0.140719	0.0910791	0.154245	-0.00316547	0.196259	0.136115	0.0464748	0.148201	0.141871	0.201439	0.037554	-0.057554
ETOPOSIDE	0.0473381	-0.057554	-0.057554	-0.057554	-0.00345324	-0.00892086	0.0453237	-0.057554	0.101727	0.153957	-0.057554	-0.00460432	0.198561	0.105755	0.150504	0.0516547	0.257698	0.0484892	0.0548201	0.311511	0.461151	0.357986	0.255683	-0.057554	-0.00316547	-0.00230216	0	0.306331	-0.00920863	0.0496403	-0.00863309	0.0505036	0.100288	-0.057554	0.100863	0.15223	-0.00258993	0.045036	-0.00805755	0.045036	0.416115	0.203453	-0.00517986	0.0997122	0.0928058	-0.057554	0.308921	0.0968345	-0.00431655
EVEROLIMUS	-0.057554	0.0398561	0.195396	-0.057554	-0.00460432	-0.057554	0.144173	0.0410072	0.153669	-0.00633094	0.0389928	0.0421583	0.200288	0.104892	0.0910791	0.313237	0.200288	0.149928	0.148489	0.0939568	0.514388	0.358849	0.200288	-0.057554	-0.00805755	0.0988489	0.306331	0	-0.0106475	-0.00230216	0.042446	0.0928058	0.0971223	-0.057554	0.0971223	0.351079	0.138705	0.140719	-0.00604317	0.139568	0.256547	0.149353	0.0433094	0.259137	0.345612	0.0953957	0.250791	0.0919424	-0.057554
FLOXURIDINE	0.0461871	-0.057554	-0.00776978	0.154245	0.0479137	0.0991367	0.267194	0.0415827	0.14705	0.201151	0.205755	0.208058	0.0499281	0.0922302	0.147626	0.042446	0.148489	0.469209	0.0968345	-0.057554	-0.0094964	0.0976978	0.100288	0.0884892	0.143597	0.0470504	-0.00920863	-0.0106475	0	0.104029	0.157698	0.0435971	0.0435971	0.262302	0.0513669	0.096259	0.0461871	0.0479137	0.372662	0.197698	-0.057554	0.149065	-0.00402878	-0.00489209	0.146187	-0.00201439	-0.057554	0.0482014	0.208345
FLUCONAZOLE	0.0484892	-0.057554	-0.00633094	0.191942	0.102878	0.136978	0.195108	0.0464748	0.254245	0.0421583	0.0415827	0.0899281	0.204604	0.101151	0.0997122	0.0479137	0.0922302	0.196547	0.347338	0.102878	0.0456115	0.151079	-0.0094964	0.200863	0.0994245	0.0447482	0.0496403	-0.00230216	0.104029	0	0.042446	0.101439	-0.00517986	0.186475	0.207482	0.152806	-0.057554	0.215252	0.241007	0.102302	0.100863	0.101727	0.147914	0.0453237	0.420432	0.20259	0.0484892	0.0997122	0.193094
FLUDARABINE	0.037554	-0.0100719	0.138705	-0.00978417	-0.057554	0.041295	0.304317	0.136691	-0.057554	0.0882014	0.744317	0.639424	0.0395683	0.0433094	0.191079	0.193957	-0.00920863	0.201439	0.0893525	0.0418705	-0.0100719	0.0902158	-0.057554	-0.00719424	0.0404317	0.0418705	-0.00863309	0.042446	0.157698	0.042446	0	-0.00892086	-0.00805755	0.0502158	0.193957	0.196259	0.0910791	0.0919424	0.250791	0.0939568	0.041295	-0.00805755	-0.00834532	-0.00748201	0.146763	0.0453237	0.0882014	-0.00748201	-0.0100719
FLUMETHASONE	0.15741	0.0369784	0.0392806	-0.057554	-0.057554	-0.057554	0.0392806	-0.00776978	-0.0057554	-0.057554	-0.00776978	-0.00892086	0.0910791	0.0922302	0.0470504	0.096259	0.196547	0.088777	0.523022	-0.00115108	0.0438849	0.0916547	0.0939568	0.0905036	0.143597	0.198849	0.0505036	0.0928058	0.0435971	0.101439	-0.00892086	0	0.63223	-0.057554	0.0435971	0.041295	0.202302	0.146187	-0.057554	-0.00978417	-0.00633094	0.20259	0.0366906	-0.0094964	0.199137	0.092518	0.3	-0.057554	-0.057554
FLUOROMETHOLONE	0.211799	-0.0103597	0.092518	-0.00748201	-0.00489209	0.149353	0.0441727	0.0418705	0.0913669	0.148777	0.0389928	0.139856	0.0913669	0.0473381	0.20777	0.197122	0.255396	0.0982734	0.476978	-0.00115108	0.0922302	0.247626	0.201439	0.0418705	0.148777	0.257122	0.100288	0.0971223	0.0435971	-0.00517986	-0.00805755	0.63223	0	0.0447482	0.100863	0.247914	0.30777	0.0384173	0.0427338	0.191942	0.0430216	0.205755	0.0389928	0.0910791	0.0479137	0.137266	0.253957	0.0470504	0.0467626
FLUOROURACIL	-0.057554	-0.057554	-0.057554	0.420432	-0.00460432	0.304317	0.203165	-0.057554	0.198561	0.209496	0.101439	0.101727	-0.057554	-0.057554	0.103453	-0.057554	0.104892	0.200576	0.190216	-0.057554	-0.057554	0.0470504	0.105468	0.0435971	0.0496403	-0.057554	-0.057554	-0.057554	0.262302	0.186475	0.0502158	-0.057554	0.0447482	0	-0.057554	0.0493525	-0.057554	-0.057554	0.299137	0.0427338	-0.057554	0.104317	-0.057554	-0.057554	-0.057554	-0.057554	-0.00546763	0.105468	0.30777
FLUPHENAZINE	0.0956835	-0.00863309	0.196259	-0.00489209	0.142446	0.100288	0.245036	0.147338	0.10259	0.204892	0.0942446	0.0965468	0.202302	0.0988489	0.257698	0.36259	0.0415827	0.150791	0.152806	0.0948201	0.146763	0.255683	-0.00978417	0.145612	0.146187	0.199424	0.100863	0.0971223	0.0513669	0.207482	0.193957	0.0435971	0.100863	-0.057554	0	0.413237	0.2	0.248489	0.147338	0.312662	0.153669	-0.00489209	0.24705	0.100576	0.308633	0.357122	0.149353	0.197986	-0.00690647
FLUVASTATIN	0.100288	-0.0109353	0.300576	-0.00604317	0.144748	0.206906	0.252518	0.248201	0.245612	0.303741	0.146475	0.249353	0.201439	0.202878	0.315827	0.46259	0.25223	0.101151	0.206619	0.148489	0.242158	0.313813	0.200288	0.147338	0.15223	0.356835	0.15223	0.351079	0.096259	0.152806	0.196259	0.041295	0.247914	0.0493525	0.413237	0	0.248201	0.298273	0.195396	0.407194	0.203453	0.205468	0.192518	0.146763	0.409784	0.243022	0.206043	0.253669	0.102014
FULVESTRANT	0.316978	-0.0115108	0.193957	-0.00633094	-0.057554	0.0953957	-0.00690647	0.188201	0.0404317	0.0458993	-0.00719424	-0.00517986	-0.00661871	0.202302	0.198561	0.406619	0.204604	-0.00374101	0.202014	0.0496403	0.149065	0.153957	0.150216	-0.0057554	0.0988489	0.312374	-0.00258993	0.138705	0.0461871	-0.057554	0.0910791	0.202302	0.30777	-0.057554	0.2	0.248201	0	0.0407194	0.142446	0.310647	0.0467626	0.203453	-0.0115108	0.142734	0.149065	0.139568	0.251367	0.0433094	-0.00920863
GEFITINIB	-0.00920863	0.0893525	0.623309	-0.057554	0.149928	-0.00863309	0.192518	0.300863	-0.00863309	-0.00719424	0.140719	0.0384173	0.0945324	0.253381	0.150791	0.245899	0.19482	0.0930935	0.140719	0.200576	0.041295	0.144748	0.0913669	0.629928	0.146187	0.140719	0.045036	0.140719	0.0479137	0.215252	0.0919424	0.146187	0.0384173	-0.057554	0.248489	0.298273	0.0407194	0	0.0404317	0.0982734	0.0942446	0.20259	0.193669	-0.00892086	0.360576	0.620432	0.0415827	0.196835	-0.00748201
GEMCITABINE	0.0398561	-0.057554	0.142446	0.303165	-0.0094964	0.340719	0.512374	0.137842	0.194532	0.0461871	0.20259	0.155683	-0.057554	0.0930935	0.146763	0.148777	-0.057554	0.531655	0.344748	0.0953957	-0.00920863	-0.00374101	-0.057554	-0.0094964	0.0401439	0.0910791	-0.00805755	-0.00604317	0.372662	0.241007	0.250791	-0.057554	0.0427338	0.299137	0.147338	0.195396	0.142446	0.0404317	0	0.148489	-0.057554	-0.057554	-0.0106475	0.0433094	0.0933813	0.038705	0.0427338	-0.011223	0.202302
HALOPERIDOL	0.0971223	0.052518	0.145899	-0.00546763	0.100863	0.203741	0.0910791	0.0928058	0.246763	0.151655	0.0902158	0.141583	0.150216	0.259424	0.309209	0.260576	0.045036	0.0971223	0.153381	0.0994245	0.140719	0.197986	0.0456115	0.0398561	0.198849	0.154245	0.045036	0.139568	0.197698	0.102302	0.0939568	-0.00978417	0.191942	0.0427338	0.312662	0.407194	0.310647	0.0982734	0.148489	0	0.207194	0.0447482	0.0907914	0.147338	0.299712	0.146187	0.141583	0.253094	0.0948201
HOMOHARRINGTONINE	-0.00805755	-0.057554	-0.057554	-0.057554	-0.0057554	-0.057554	0.0939568	-0.00892086	0.104029	0.0415827	-0.0094964	-0.00546763	0.202302	0.259424	0.0421583	0.0965468	0.148201	0.0490647	-0.00201439	0.096259	0.357122	0.25223	0.100863	-0.00834532	-0.057554	-0.00316547	0.416115	0.256547	-0.057554	0.100863	0.041295	-0.00633094	0.0430216	-0.057554	0.153669	0.203453	0.0467626	0.0942446	-0.057554	0.207194	0	0.0939568	0.0418705	0.202014	0.145324	-0.00776978	0.20777	0.299137	0.0407194
IDARUBICIN	0.101439	-0.00863309	-0.00690647	-0.00402878	0.0516547	0.105468	-0.00690647	0.0421583	0.0971223	0.204892	0.0430216	-0.0057554	-0.00374101	0.148489	0.106619	0.0991367	0.737698	-0.00978417	0.100576	0.152518	0.152806	0.424173	0.581295	0.145036	0.152518	0.196259	0.203453	0.149353	0.149065	0.101727	-0.00805755	0.20259	0.205755	0.104317	-0.00489209	0.205468	0.203453	0.20259	-0.057554	0.0447482	0.0939568	0	0.0410072	-0.00776978	0.0959712	0.0444604	0.146187	0.158849	0.154532
IMATINIB	-0.00604317	-0.0115108	0.148489	-0.057554	0.0922302	-0.057554	0.0910791	0.200863	0.0473381	-0.0094964	-0.00805755	0.038705	0.096259	-0.00892086	-0.00633094	0.092518	0.0861871	-0.00834532	0.0430216	-0.00748201	-0.00776978	0.142734	0.0364029	0.244748	-0.00690647	0.136115	-0.00517986	0.0433094	-0.00402878	0.147914	-0.00834532	0.0366906	0.0389928	-0.057554	0.24705	0.192518	-0.0115108	0.193669	-0.0106475	0.0907914	0.0418705	0.0410072	0	0.0415827	0.14705	0.301151	-0.00719424	0.410647	-0.00978417
IRINOTECAN	0.0458993	-0.057554	0.0435971	0.0435971	-0.057554	0.0444604	-0.00834532	0.0433094	0.261439	0.045036	-0.0057554	0.0942446	0.0461871	0.255396	0.149353	0.143885	0.0473381	0.045036	0.0490647	-0.057554	0.307482	0.256259	0.0476259	-0.00719424	0.0389928	0.0464748	0.0997122	0.259137	-0.00489209	0.0453237	-0.00748201	-0.0094964	0.0910791	-0.057554	0.100576	0.146763	0.142734	-0.00892086	0.0433094	0.147338	0.202014	-0.00776978	0.0415827	0	0.0433094	0.0956835	0.145036	0.0930935	-0.00920863
ITRACONAZOLE	0.0997122	-0.00690647	0.301439	-0.057554	0.102878	-0.00719424	0.245324	0.246475	0.0968345	0.041295	0.195108	0.0879137	0.356547	0.197986	0.308921	0.307194	0.0418705	0.141295	0.249928	0.150504	0.136403	0.149065	-0.057554	0.196259	0.195971	0.148201	0.0928058	0.345612	0.146187	0.420432	0.146763	0.199137	0.0479137	-0.057554	0.308633	0.409784	0.149065	0.360576	0.0933813	0.299712	0.145324	0.0959712	0.14705	0.0433094	0	0.311511	0.143885	0.100288	-0.00690647
LAPATINIB	0.0484892	0.0939568	0.624748	-0.057554	0.148489	-0.00978417	0.0965468	0.249353	0.0435971	0.0404317	0.146187	0.0873381	0.158273	0.0936691	0.201151	0.251367	0.140719	-0.00460432	0.0444604	0.0453237	-0.0106475	0.195683	0.0899281	0.521583	0.146763	0.141871	-0.057554	0.0953957	-0.00201439	0.20259	0.0453237	0.092518	0.137266	-0.057554	0.357122	0.243022	0.139568	0.620432	0.038705	0.146187	-0.00776978	0.0444604	0.301151	0.0956835	0.311511	0	0.0441727	0.255396	-0.00805755
LOVASTATIN	0.209496	-0.00978417	0.0395683	-0.057554	-0.057554	-0.00719424	0.0905036	-0.0100719	0.101439	-0.00633094	-0.00834532	-0.00661871	0.148777	0.148201	0.0401439	0.0982734	0.196835	0.0959712	0.149065	0.155683	0.351942	0.247338	0.143597	-0.00920863	0.0435971	0.201439	0.308921	0.250791	-0.057554	0.0484892	0.0882014	0.3	0.253957	-0.00546763	0.149353	0.206043	0.251367	0.0415827	0.0427338	0.141583	0.20777	0.146187	-0.00719424	0.145036	0.143885	0.0441727	0	-0.00690647	-0.00892086
MEBENDAZOLE	-0.00489209	-0.057554	0.0994245	-0.00316547	0.201727	0.108633	0.0418705	0.0959712	0.15223	0.156259	0.0438849	0.0433094	-0.00230216	0.245324	0.204604	0.0441727	0.256259	-0.057554	-0.057554	0.0461871	0.0936691	0.304317	0.207194	0.24705	0.104029	0.037554	0.0968345	0.0919424	0.0482014	0.0997122	-0.00748201	-0.057554	0.0470504	0.105468	0.197986	0.253669	0.0433094	0.196835	-0.011223	0.253094	0.299137	0.158849	0.410647	0.0930935	0.100288	0.255396	-0.00690647	0	0.151942
METHOTREXATE	-0.057554	-0.057554	-0.057554	0.201151	-0.00201439	0.300576	0.1	-0.00920863	0.451942	0.201727	0.0401439	-0.00661871	-0.057554	-0.00834532	0.154245	0.0366906	0.205755	0.151655	0.143597	0.0433094	-0.057554	0.0976978	0.158849	0.0435971	0.0516547	-0.057554	-0.00431655	-0.057554	0.208345	0.193094	-0.0100719	-0.057554	0.0467626	0.30777	-0.00690647	0.102014	-0.00920863	-0.00748201	0.202302	0.0948201	0.0407194	0.154532	-0.00978417	-0.00920863	-0.00690647	-0.00805755	-0.00892086	0.151942	0
METHYLPREDNISOLONE	0.268633	-0.057554	-0.057554	-0.057554	-0.057554	-0.057554	0.0410072	0.0919424	-0.0100719	-0.00920863	0.0395683	-0.0094964	0.145612	0.0922302	0.0464748	-0.00834532	0.202302	0.042446	0.310647	0.0994245	0.0922302	0.0919424	0.0484892	0.140719	0.0951079	0.157122	0.0991367	0.0389928	0.0893525	0.151367	-0.00805755	0.526187	0.476115	-0.057554	0.0438849	0.0951079	0.210072	0.148777	-0.057554	0.0407194	0.0916547	0.203165	-0.00776978	-0.057554	0.299424	0.045036	0.20777	-0.00690647	-0.0094964
MEVASTATIN	0.10518	-0.057554	-0.057554	-0.057554	-0.057554	0.0427338	-0.00633094	-0.057554	0.0976978	-0.057554	-0.057554	-0.057554	-0.057554	0.0994245	-0.00633094	-0.057554	0.0945324	-0.00633094	0.196259	0.210072	0.249065	0.145036	0.0919424	-0.057554	-0.00345324	0.0473381	0.250216	0.0956835	-0.057554	-0.00633094	-0.057554	0.207194	0.206906	-0.00546763	-0.057554	-0.00057554	0.149065	-0.057554	0.0441727	-0.00345324	0.0951079	0.0936691	-0.057554	0.0968345	-0.00517986	-0.057554	0.631367	0.0430216	0.0444604
MIFEPRISTONE	0.367194	0.041295	0.299712	-0.00748201	-0.00316547	0.0956835	0.142158	0.190791	0.143597	0.143885	0.0945324	0.0418705	0.151079	0.152806	0.303165	0.461439	0.251367	0.0945324	0.306619	0.150216	0.0905036	0.300288	0.149353	0.0435971	0.203453	0.31036	0.0974101	0.353669	0.0496403	0.0994245	0.194532	0.359137	0.414676	-0.057554	0.308345	0.458273	0.460863	0.146763	0.146187	0.254245	0.0404317	0.201151	0.141007	0.0896403	0.459712	0.301151	0.35741	0.0467626	0.0366906
MITOXANTRONE	0.143597	0.042446	0.142734	0.0435971	0.103741	0.208058	0.139856	0.191942	0.20259	0.20777	0.140432	0.0953957	0.0936691	0.253669	0.366331	0.360576	0.210072	0.143309	0.197698	0.0976978	0.0985612	0.362302	0.111511	0.146475	0.352518	0.149928	0.0528058	0.153957	0.200288	0.208345	0.190216	0.14446	0.199424	0.0513669	0.309496	0.416115	0.145612	0.252806	0.146187	0.352518	0.149353	0.316978	0.0922302	0.203453	0.352806	0.147914	0.0922302	0.211223	0.102014
NICOTINAMIDE	0.0415827	-0.0115108	-0.00978417	0.206331	0.0994245	0.156259	-0.057554	-0.057554	0.100288	0.156259	-0.00776978	-0.00690647	0.045036	-0.00805755	0.104317	-0.00719424	0.152806	-0.057554	-0.0094964	-0.00489209	-0.057554	0.096259	0.151942	0.0438849	0.0991367	-0.00978417	-0.057554	-0.00892086	0.151079	-0.00633094	-0.057554	-0.0115108	0.0930935	0.472374	-0.00748201	0.0974101	-0.0115108	-0.0106475	-0.057554	0.0922302	-0.0094964	0.153381	0.0378417	0.0456115	-0.00690647	0.0415827	-0.057554	0.155108	0.157698
NILOTINIB	-0.057554	0.0381295	0.153957	-0.057554	-0.00402878	0.0505036	-0.057554	0.0476259	-0.00719424	0.0490647	-0.00863309	-0.00776978	-0.0057554	-0.057554	0.10259	-0.00633094	0.0991367	-0.057554	0.0410072	-0.057554	-0.057554	0.0458993	0.0982734	0.101151	0.0484892	-0.00892086	-0.057554	-0.00805755	-0.00776978	-0.057554	-0.057554	0.0410072	0.143885	0.0473381	0.0421583	0.0959712	0.0867626	0.0971223	-0.057554	0.0410072	-0.057554	0.1	0.586763	-0.00546763	-0.00517986	0.154245	-0.057554	0.316691	0.0493525
OFLOXACIN	0.0482014	0.0430216	0.304317	-0.00863309	0.103741	0.0985612	0.147914	0.195683	0.0974101	0.145036	0.199424	0.092518	0.148777	0.208058	0.313813	0.418993	0.308058	0.0919424	0.149065	0.158273	0.0976978	0.309209	0.209496	0.24446	0.304317	0.153957	0.103741	0.209784	0.0369784	0.206331	0.196835	0.193957	0.246763	0.0456115	0.205468	0.411799	0.151367	0.410072	0.0458993	0.249065	0.15223	0.257122	0.0930935	-0.00776978	0.310647	0.306619	0.199712	0.15482	0.145036
OLAPARIB	-0.00345324	-0.057554	-0.057554	0.460288	-0.00201439	0.617266	0.0441727	-0.00661871	0.25223	-0.00863309	0.0398561	-0.011223	0.463741	-0.057554	0.0884892	-0.00776978	-0.00805755	0.0933813	0.146187	0.253094	-0.057554	0.0464748	-0.057554	-0.00604317	-0.00431655	-0.057554	-0.0057554	-0.057554	0.0490647	0.301439	-0.00748201	-0.057554	-0.057554	0.144748	0.0507914	-0.00402878	-0.057554	-0.00489209	0.201439	-0.00316547	-0.00863309	-0.00690647	0.0473381	-0.00661871	0.0994245	0.101439	-0.00402878	0.0493525	0.243022
OUABAIN	0.0482014	-0.057554	-0.057554	-0.00316547	0.15482	-0.057554	0.0447482	-0.057554	0.103453	-0.057554	-0.057554	-0.00546763	0.0482014	-0.057554	0.0441727	-0.00316547	-0.0028777	0.0479137	0.106043	0.209209	0.0985612	0.0493525	-0.00489209	-0.057554	-0.000863309	0.0473381	0.214101	0.0490647	-0.00460432	-0.0028777	-0.057554	0.15482	0.157698	-0.00345324	0.0479137	0.0499281	0.0484892	-0.00661871	-0.057554	0.0444604	0.0513669	-0.00201439	-0.00604317	-0.00604317	0.0982734	-0.057554	0.153957	-0.057554	0.0519424
OXIBENDAZOLE	-0.057554	0.0444604	0.252806	-0.057554	0.303453	0.0502158	0.0988489	0.199712	-0.00748201	0.0997122	0.14446	0.088777	0.0922302	0.0948201	0.209209	0.148201	0.200576	0.0444604	-0.0057554	0.0470504	-0.0100719	0.248777	0.1	0.30518	0.198273	0.0433094	0.041295	-0.00460432	0.0433094	0.153957	0.0464748	0.0464748	0.138993	0.0470504	0.204317	0.207482	-0.057554	0.36518	-0.00748201	0.0905036	0.0930935	0.153381	0.25741	-0.057554	0.255971	0.359424	-0.0057554	0.371799	0.148777
PACLITAXEL	0.0418705	-0.057554	-0.0103597	0.0456115	0.0456115	0.101439	0.0458993	-0.0100719	0.250791	0.0997122	-0.00892086	0.0913669	-0.00719424	0.151942	0.199137	0.0936691	0.30777	0.096259	0.100863	0.0974101	0.688777	0.462014	0.306619	-0.00719424	0.0482014	0.100576	0.355396	0.408921	0.148777	-0.00431655	-0.0103597	0.0447482	0.195971	0.102302	0.0476259	0.200288	0.152518	-0.0100719	0.0456115	0.141583	0.200576	0.25741	-0.00748201	0.304029	-0.00776978	-0.057554	0.251655	0.196259	0.206043
PAZOPANIB	-0.00661871	0.0395683	0.199424	0.145036	0.0479137	0.30777	-0.00978417	0.0936691	0.19223	0.468921	0.141007	0.0922302	0.0430216	0.0461871	0.21295	0.254532	0.262302	0.147914	0.0951079	-0.00719424	0.150791	0.256259	0.26259	0.0974101	0.151655	0.0507914	0.0948201	0.150216	0.25223	0.0421583	0.0896403	-0.00834532	0.199424	0.200288	0.156259	0.30518	0.104029	0.142158	0.152806	0.152518	0.0464748	0.208921	-0.057554	0.0467626	0.0942446	0.148777	0.0956835	0.152806	0.254532
PEMETREXED	0.141007	-0.057554	0.200288	-0.00719424	-0.00604317	0.0470504	0.153957	0.143885	0.0467626	0.042446	0.0441727	0.0433094	-0.00489209	0.0490647	0.0991367	0.153957	-0.00604317	0.156835	0.0473381	-0.00460432	-0.00374101	0.0979856	-0.00633094	-0.057554	0.0447482	0.150791	-0.00431655	0.0974101	0.206906	-0.00517986	0.0956835	-0.057554	0.0456115	-0.057554	0.148777	0.20777	0.204604	-0.00517986	0.208921	0.152806	-0.057554	-0.00604317	0.0453237	-0.00489209	0.152518	0.0939568	0.042446	0.0464748	0.11036
PIMOZIDE	0.0976978	-0.057554	0.149353	0.0484892	0.0528058	0.0493525	0.0997122	0.0953957	0.151367	-0.00201439	-0.00604317	0.0461871	-0.00258993	0.260288	0.205755	0.209209	-0.057554	0.0502158	0.0496403	0.0510791	-0.057554	0.0493525	-0.057554	-0.0057554	0.0470504	0.101439	-0.057554	-0.0057554	0.207194	0.0533813	0.0959712	-0.057554	-0.00345324	-0.00402878	0.21036	0.157122	0.310647	0.0982734	0.15223	0.482158	0.103741	-0.057554	-0.00489209	0.048777	0.155971	0.101439	0.0435971	0.152518	0.145324
PONATINIB	-0.057554	-0.0100719	0.293381	-0.057554	-0.057554	-0.057554	-0.0103597	0.164029	-0.057554	-0.0094964	0.0384173	-0.011223	0.0410072	-0.00517986	0.0858993	0.0427338	-0.00719424	-0.00892086	-0.0094964	-0.057554	-0.00834532	0.037554	-0.00719424	0.0464748	-0.0094964	-0.057554	-0.00604317	0.139568	-0.057554	-0.0109353	-0.00978417	-0.00892086	-0.057554	-0.057554	0.0404317	-0.0094964	-0.057554	0.0919424	-0.057554	-0.057554	-0.00633094	-0.057554	0.102014	0.0933813	0.135252	0.199424	-0.0094964	0.0951079	-0.057554
PROGESTERONE	0.259137	-0.00316547	0.041295	-0.00978417	-0.00719424	0.0939568	0.0421583	0.0389928	0.0933813	0.0444604	-0.00776978	0.0407194	-0.00834532	0.249353	0.14964	0.0942446	0.0994245	0.042446	0.31036	0.048777	0.0433094	0.147338	0.0985612	0.0401439	0.150504	0.310647	0.0499281	-0.00489209	0.0389928	-0.00546763	0.0395683	0.316978	0.419281	-0.00892086	0.0965468	0.150216	0.309209	-0.00690647	0.041295	0.352518	0.152518	0.0942446	-0.00863309	0.0893525	0.1	-0.0057554	0.251942	0.145899	0.041295
PUROMYCIN	-0.00748201	0.0398561	0.150216	-0.057554	-0.00604317	-0.00690647	0.306906	0.146763	-0.0109353	-0.00719424	0.625612	0.473813	0.0430216	0.0476259	0.0971223	0.248777	-0.00661871	0.0991367	0.0913669	0.0470504	-0.0100719	0.0433094	-0.057554	0.0470504	0.0441727	0.143309	-0.057554	0.0392806	0.0974101	-0.00374101	0.57295	-0.00776978	-0.00834532	-0.00633094	0.151367	0.152518	0.0505036	0.2	0.201151	0.0461871	-0.00719424	-0.00546763	0.0447482	-0.057554	0.204604	0.14964	-0.00834532	0.045036	-0.00748201
PYRIMETHAMINE	0.149065	-0.057554	0.251079	0.146475	0.0519424	0.246763	0.143885	0.142158	0.255396	0.0510791	-0.00776978	0.0435971	0.100863	0.151367	0.200863	0.256259	-0.057554	0.247626	0.248489	0.150216	0.0435971	0.100576	-0.057554	0.0444604	0.0458993	0.0982734	0.100863	0.150791	0.0953957	0.257986	0.0930935	-0.00748201	0.0444604	0.146187	0.252518	0.316691	0.199424	0.0965468	0.246763	0.353957	0.0479137	-0.057554	0.153957	0.0441727	0.308058	0.151655	0.152518	0.203165	0.151079
RALOXIFENE	0.20518	-0.057554	0.200576	0.100863	0.100863	0.206043	0.142734	0.145324	0.150216	0.205468	0.0922302	0.144748	0.145036	0.208058	0.313525	0.303453	0.10259	0.0994245	0.103453	0.0991367	0.14446	0.254245	0.103741	0.143309	0.259424	0.261151	0.149353	0.0456115	0.147338	0.103165	0.0956835	0.0458993	0.350791	0.101727	0.311511	0.413237	0.266043	0.198273	0.145899	0.408921	0.20259	0.100863	0.0415827	0.0965468	0.199424	0.193094	0.152806	0.0971223	0.149353
RALTITREXED	-0.00690647	-0.0109353	-0.0100719	0.195396	-0.0057554	0.345612	0.0982734	-0.057554	0.248201	0.104317	0.0415827	-0.00690647	0.244173	-0.057554	0.201727	-0.00690647	-0.00546763	0.203165	0.193381	0.0976978	-0.011223	0.0876259	-0.00517986	-0.00892086	0.0415827	-0.057554	0.252806	-0.00920863	0.0473381	0.195971	-0.0106475	-0.00978417	0.0401439	0.141871	-0.00920863	-0.00604317	-0.057554	-0.0100719	0.257698	-0.00978417	0.041295	-0.00517986	-0.057554	-0.00230216	0.0907914	0.0482014	0.0410072	-0.00546763	0.368345
SIMVASTATIN	0.251367	-0.057554	0.0899281	0.144173	-0.057554	0.289065	0.146475	0.134676	0.204892	0.0447482	-0.0100719	0.0456115	0.1	0.096259	0.142446	0.149353	-0.00316547	0.255108	0.41036	0.203741	0.149353	0.0507914	-0.00517986	-0.057554	-0.00863309	0.149353	0.20777	0.1	-0.00633094	0.255683	0.136403	0.152518	0.206043	0.143597	0.202014	0.312086	0.245324	0.0410072	0.348777	0.196547	0.105468	-0.00230216	-0.00517986	0.0461871	0.195683	-0.057554	0.52964	-0.057554	0.148489
STAUROSPORINE	-0.057554	-0.00892086	0.0438849	-0.057554	0.0502158	-0.00201439	0.185036	-0.057554	0.0976978	0.0502158	0.0453237	0.0433094	0.0907914	0.109496	0.0997122	0.250216	0.16	0.141583	0.0427338	0.0456115	0.20259	0.255971	0.160576	-0.00633094	0.0461871	-0.00748201	0.206619	0.362014	0.0447482	-0.00719424	0.0438849	0.0392806	0.0430216	-0.00489209	0.0905036	0.199424	-0.057554	0.0910791	0.042446	0.0873381	0.205468	0.104029	-0.0103597	0.24705	0.191942	-0.00431655	0.140719	0.102302	0.0988489
SUNITINIB	0.0930935	-0.00892086	0.197698	0.147338	-0.00172662	0.160576	0.236691	0.143022	0.0496403	0.262302	0.143885	0.149353	0.145612	0.0493525	0.361727	0.414388	0.0539568	0.150216	0.248489	0.092518	0.0939568	0.208345	0.0545324	-0.00489209	0.154245	0.153381	0.201151	0.145899	0.146475	0.192518	0.189065	0.0427338	0.205468	0.150216	0.306043	0.366043	0.201727	0.141295	0.191367	0.357986	0.102014	0.0542446	-0.00661871	0.0482014	0.195683	0.0453237	0.195108	0.0539568	0.0536691
TAMOXIFEN	0.151079	-0.057554	-0.057554	0.0447482	-0.00748201	-0.00604317	0.037554	-0.057554	0.0968345	0.0415827	-0.0103597	0.038705	0.142158	0.0453237	0.0427338	-0.00690647	0.0484892	0.0407194	0.0430216	-0.00920863	0.088777	0.143885	0.0493525	0.0435971	0.195396	0.102878	0.0945324	0.0418705	0.0942446	0.14705	-0.00978417	0.0936691	0.0942446	0.0473381	0.141583	0.141871	0.0559712	0.0418705	-0.057554	0.13295	0.147626	0.0959712	0.0389928	-0.00978417	0.137266	0.0461871	0.14705	0.0959712	0.0453237
TEMSIROLIMUS	0.198273	-0.057554	0.144748	-0.00690647	0.0461871	0.199137	0.145324	0.139281	0.304604	0.151079	0.0369784	0.0956835	0.0479137	0.149928	0.253957	0.306619	0.204317	0.155683	0.156547	0.148489	0.358561	0.314101	0.300863	-0.00719424	0.14446	0.0994245	0.208058	0.479281	0.045036	-0.00201439	0.0913669	0.0505036	0.305468	0.0458993	0.20259	0.507482	0.249065	0.0882014	0.143022	0.346475	0.15223	0.203741	-0.00517986	0.357986	0.196835	0.0384173	0.256547	0.0988489	0.0479137
TENIPOSIDE	-0.00805755	0.0410072	0.0922302	-0.00805755	-0.00345324	0.142158	0.0928058	0.0418705	0.0905036	0.0930935	0.0447482	-0.00690647	0.0467626	0.161151	0.201727	0.401727	0.261439	0.0959712	0.143309	0.150504	0.208345	0.314676	0.210647	-0.00661871	0.042446	0.0435971	0.262302	0.312374	0.0410072	0.0438849	0.0919424	0.0421583	0.0902158	-0.057554	0.200863	0.195683	0.141295	0.146475	0.142446	0.0994245	0.206043	0.206331	0.0398561	0.354532	0.0997122	0.146763	0.0951079	0.150216	0.0398561
TERCONAZOLE	0.0968345	0.0407194	0.145036	-0.057554	0.0985612	0.0395683	0.244748	0.0928058	0.200576	0.0936691	0.143597	0.0441727	0.415827	0.145899	0.249928	0.355396	0.145036	0.0982734	0.251079	0.145036	0.343309	0.251942	0.0930935	0.0461871	0.196835	0.19741	0.254532	0.298849	0.0484892	0.269209	0.141871	0.148201	0.147626	-0.057554	0.463453	0.454532	0.140144	0.295683	0.0870504	0.251655	0.306331	0.0974101	0.19741	0.0922302	0.583022	0.257986	0.15223	0.197122	-0.00748201
TOPOTECAN	0.092518	-0.0106475	0.0899281	0.147626	-0.00374101	0.242734	0.143022	0.0398561	0.485324	0.0444604	-0.00978417	0.0464748	0.203165	0.14964	0.0922302	0.149065	0.0430216	0.254245	0.357122	0.0930935	0.251079	0.207194	0.0415827	-0.057554	0.0430216	0.148201	0.153094	0.256835	0.0493525	0.307482	0.0870504	0.041295	0.0956835	0.0953957	0.254532	0.300576	0.143309	0.0876259	0.251655	0.253957	0.208345	-0.00776978	0.0942446	0.370647	0.147338	0.0458993	0.253094	0.0971223	0.198561
TRAMETINIB	0.0942446	-0.00661871	0.252518	-0.00776978	-0.00345324	0.045036	0.145612	0.259712	0.0510791	0.143022	0.0951079	0.0447482	0.152806	0.0470504	0.149928	0.404029	-0.00834532	0.0982734	0.151942	0.0447482	0.0456115	0.202014	-0.057554	0.154245	0.0968345	0.0997122	0.0496403	0.150216	0.145324	0.155971	0.191367	0.0453237	0.0456115	-0.057554	0.411223	0.256547	0.145324	0.14964	0.0435971	0.204604	0.0997122	-0.00719424	0.416115	0.0968345	0.30259	0.21295	0.0997122	0.206906	0.0407194
TRIAMCINOLONE	0.0985612	-0.057554	-0.057554	-0.057554	-0.00661871	-0.00776978	0.0974101	-0.057554	0.153094	-0.0057554	-0.057554	-0.00489209	0.250504	-0.00517986	-0.0057554	-0.00258993	-0.00258993	0.100863	0.368345	0.103165	0.197986	0.0951079	-0.00460432	-0.057554	-0.00892086	0.0482014	0.260863	0.0496403	-0.00604317	0.15482	-0.00690647	0.476691	0.417842	-0.057554	0.153381	0.102302	0.0994245	-0.00661871	-0.00719424	0.148777	0.262878	-0.00172662	0.0441727	0.0458993	0.195683	-0.0057554	0.312374	0.0461871	0.0456115
VALPROICACID	-0.057554	-0.057554	-0.057554	0.0430216	-0.057554	-0.057554	-0.057554	-0.057554	-0.00633094	-0.057554	-0.057554	-0.057554	-0.057554	-0.057554	-0.0106475	-0.057554	-0.057554	-0.057554	-0.057554	-0.057554	-0.057554	-0.057554	-0.057554	-0.057554	-0.00748201	-0.057554	-0.057554	-0.057554	-0.00690647	-0.057554	-0.057554	-0.057554	-0.057554	0.0418705	-0.057554	-0.057554	-0.057554	-0.057554	-0.057554	-0.057554	-0.057554	-0.00776978	-0.057554	-0.057554	-0.057554	-0.057554	-0.00633094	-0.057554	-0.00690647
VEMURAFENIB	0.045036	-0.00920863	0.198849	0.197122	0.158561	0.149928	0.0410072	0.0433094	0.199712	0.103453	0.0435971	0.0435971	0.0482014	0.103741	0.21554	0.0484892	0.108921	0.042446	0.141871	0.101151	-0.00316547	0.153669	0.109496	0.150216	0.0997122	-0.057554	-0.00115108	0.0519424	0.0447482	0.298273	-0.057554	-0.057554	0.0461871	0.250791	0.0401439	0.20777	-0.057554	0.152806	0.14446	0.147626	-0.00345324	0.109209	0.196259	0.0458993	0.149928	0.254245	-0.00258993	0.418705	0.15223
VINBLASTINE	0.041295	-0.0100719	0.240144	-0.00748201	-0.0094964	0.0948201	0.140144	0.191942	0.0415827	0.145036	0.092518	-0.00633094	-0.00892086	0.25741	0.302014	0.349065	0.0994245	0.0438849	0.0933813	0.0456115	0.153094	0.199712	0.048777	0.0435971	0.0913669	0.092518	0.100576	0.301727	-0.00546763	-0.00374101	0.191367	-0.00892086	0.0427338	-0.057554	0.253094	0.302302	0.193669	0.145324	0.191367	0.20259	0.203165	0.0441727	0.0942446	0.297986	0.29741	0.145036	0.138417	0.249065	0.0407194
VINCRISTINE	0.0430216	-0.0094964	0.190791	-0.00690647	-0.057554	0.0467626	0.149353	0.143885	-0.057554	0.0953957	0.0951079	-0.0057554	-0.00834532	0.162302	0.250791	0.349065	0.101727	0.0994245	0.0956835	0.0476259	0.106906	0.203165	0.0502158	-0.00402878	0.0435971	0.0473381	0.104317	0.304029	0.0496403	-0.00316547	0.19223	-0.00834532	-0.00517986	-0.057554	0.153957	0.205468	0.0959712	0.0982734	0.149065	0.0988489	0.155683	0.0458993	-0.00517986	0.307194	0.249353	0.0490647	0.0896403	0.0985612	0.0974101
VINORELBINE	-0.00863309	0.0410072	0.195971	-0.057554	-0.00776978	0.0398561	0.146187	0.0948201	-0.011223	0.139281	0.0979856	-0.057554	0.096259	0.157122	0.200576	0.300288	0.149353	-0.00489209	0.092518	0.0464748	0.200576	0.151079	0.0971223	0.0458993	0.0933813	0.0905036	0.150504	0.304892	-0.057554	0.0467626	0.143597	0.0421583	0.0372662	-0.057554	0.252806	0.295683	0.0882014	0.199712	0.0867626	0.0470504	0.203741	0.0945324	0.142734	0.146763	0.254245	0.199712	0.0959712	0.199712	-0.00690647
VORINOSTAT	-0.0103597	-0.057554	-0.0109353	0.352518	-0.00517986	0.293669	0.096259	-0.0106475	0.249353	0.0965468	-0.0103597	0.038705	-0.057554	-0.00863309	0.148489	-0.00978417	0.0467626	0.146475	0.293957	-0.00431655	-0.057554	0.0930935	0.0473381	-0.00834532	0.0968345	-0.00805755	-0.057554	-0.057554	0.0936691	0.245324	-0.0109353	-0.057554	0.0893525	0.402014	-0.00604317	0.0953957	-0.00748201	-0.057554	0.296547	0.088777	-0.057554	0.0470504	-0.057554	-0.00805755	-0.057554	-0.057554	-0.00143885	0.0467626	0.302878
YOHIMBINE	0.045036	0.0415827	0.358561	-0.0057554	-0.057554	0.0965468	0.0930935	0.246187	-0.0115108	0.145324	0.143885	0.0444604	0.0473381	0.0502158	0.253669	0.519856	0.0407194	0.0484892	0.150504	0.0441727	-0.0106475	0.096259	-0.00805755	-0.00834532	0.0939568	0.1	-0.057554	0.262302	0.0456115	0.0407194	0.196547	0.0427338	0.143597	-0.057554	0.256259	0.359712	0.356835	0.195108	0.148777	0.209209	-0.0109353	0.042446	0.0389928	0.0430216	0.309209	0.243885	0.0447482	-0.00863309	-0.011223
[truncated: 37 more columns]
